# Supplementary material for: Habitat-specific variation in gut microbial communities and pathogen prevalence in bumblebee queens (Bombus terrestris)
Source: PLoS One. 2018 Oct 25;13(10):e0204612. doi: 10.1371/journal.pone.0204612 (PMC6201867; doi:10.1371/journal.pone.0204612)
Supplement: S3 Table — (XLSX) [file pone.0204612.s003.xlsx]

## Sheet: Blad1
S3 Table. Identificationa of bacterial operational taxonomic units (OTUs) according to the Silva v1.23 database and distribution over the investigated samples.
OTU	GenBank Accession N°b	Phylumc	Family	Genus	Species	Name OTU in literature (Meeus et al., 2015)	S1-F								S2-F										S3-U										S4-U										S5-U
							S1_1	S1_2	S1_3	S1_4	S1_5	S1_6	S1_7	S1_8	S2_1	S2_2	S2_3	S2_4	S2_5	S2_6	S2_7	S2_8	S2_9	S2_10	S3_1	S3_2	S3_3	S3_4	S3_5	S3_6	S3_7	S3_8	S3_9	S3_10	S4_1	S4_2	S4_3	S4_4	S4_5	S4_6	S4_7	S4_8	S4_9	S4_10	S5_1	S5_2	S5_3	S5_4	S5_5
1	MH815255	p:Proteobacteria	f:Neisseriaceae(1.0000)	g:Snodgrassella(0.9900)	s:Snodgrassella_alvi(0.9900)	Beta	9	77	3	25	3054	4293	21	188	719	193	2	233	45	13	12865	326	557	10	16628	3	142	7188	5786	13969	536	8491	10052	14506	19188	6937	17397	10676	9697	14222	14227	9259	220	15096	4543	9935	338	379	1306
2	MH815256	p:Proteobacteria	f:Orbaceae(1.0000)	g:Gilliamella(1.0000)	s:Gilliamella_apicola(1.0000)	Gamma-1	6	158	1	56	4948	75	16	173	12688	77	37	401	9338	21992	8483	223	1670	15153	6583	8	138	6937	4043	7458	16	2630	8489	6653	4153	15031	4413	11943	9206	9052	9123	9888	18379	7862	18070	11629	539	809	5921
3	MH815257	p:Firmicutes	f:Bacillaceae(1.0000)	g:Bacillus(0.9600)	s:Bacillus_niacini(0.6700)		12228	14616	6	1807	80	1541	10	19707	3932	60	57	42	5	5	4	185	52	5	0	3	1	0	0	0	1	1	0	0	0	0	0	0	0	0	0	0	0	0	0	0	0	0	1
5	MH815258	p:Bacteroidetes	f:Flavobacteriaceae(1.0000)	g:Chryseobacterium(1.0000)	s:Chryseobacterium_daecheongense(1.0000)		0	1	4	0	0	2	1	6	21	633	121	315	22	20	15	792	87	8	0	4018	4276	1710	2510	424	4301	605	20	0	0	0	12	0	0	0	0	0	1	0	2	6	3	2	0
6	MH815259	p:Firmicutes	f:Lactobacillaceae(1.0000)	g:Lactobacillus(1.0000)	s:Lactobacillus_bombi(1.0000)	Firm-4/Lacto-2	0	0	1	0	0	0	0	30	17	0	0	30	0	0	5	0	0	2	0	1373	1	814	1	0	2	4472	0	24	0	0	0	0	1551	0	0	0	682	0	11	257	735	0	0
7	MH815260	p:Firmicutes	f:Bacillaceae(1.0000)	g:Bacillus(1.0000)	s:Bacillus_amyloliquefaciens(0.7200)		0	0	0	0	0	26	12	1	16	630	334	182	92	13	26	455	60	13	0	2814	2513	1042	1514	214	2999	437	10	0	0	0	7	1	0	0	0	2	0	0	0	3	0	1	0
8	MH815261	p:Proteobacteria	f:Pseudomonadaceae(1.0000)	g:Pseudomonas(1.0000)	s:Pseudomonas_deceptionensis(0.8900)		5	1098	4	0	18	14	2375	2	7	8	53	96	23	3	0	32	83	12	1	0	178	0	0	0	1	0	0	26	0	0	2	0	0	0	1	0	0	1	0	0	11924	13590	158
9	MH815262	p:Proteobacteria	f:Enterobacteriaceae(1.0000)	g:Buttiauxella(0.9900)	s:Buttiauxella_agrestis(0.9900)	Gamma-E1	0	29	84	0	70	86	381	3	51	664	541	354	47	16	27	654	192	14	7	977	787	335	545	72	1043	146	8	30	1	120	19	169	81	6	0	2	138	0	20	3	189	10	88
10	MH815263	p:Actinobacteria	f:Nocardiaceae(0.9800)	g:Gordonia(0.9800)	s:Gordonia_polyisoprenivorans(0.4000)		0	0	0	0	0	8	2	2	10	579	347	165	41	8	12	467	92	5	0	3968	3604	1518	2393	430	4253	597	10	0	0	0	11	0	0	1	0	0	0	0	3	7	0	0	0
11	MH815264	p:Proteobacteria	f:Moraxellaceae(1.0000)	g:Acinetobacter(1.0000)	s:Acinetobacter_bereziniae(0.8900)		0	1	1	0	162	44	126	7	14	115	241	244	33	27	28	435	40	15	1	2624	2469	862	2270	205	2678	274	12	1	0	0	13	0	0	1	0	0	0	0	6	3	3	0	0
12	MH815265	p:Firmicutes	f:Planococcaceae(0.4700)	g:Bacillus(0.3700)	s:Sporosarcina_siberiensis(0.1900)		85	668	0	21408	25	125	0	423	81	0	0	43	0	0	0	0	0	0	0	0	0	0	0	0	0	0	0	0	0	0	0	0	0	0	0	0	0	0	0	0	0	0	0
13	MH815266	p:Proteobacteria	f:Acetobacteraceae(1.0000)	g:Asaia(0.9600)	s:Asaia_bogorensis(0.8300)		0	0	0	0	0	4	0	1	22	622	226	93	37	6	34	232	82	2	0	1812	1657	661	932	87	1733	220	7	0	0	0	1	0	0	0	0	0	0	0	0	1	1	0	0
14	MH815267	p:Firmicutes	f:Paenibacillaceae(1.0000)	g:Paenibacillus(0.9900)	s:Paenibacillus_pabuli(0.6000)		0	71	2	0	3924	29	0	4	5	83	31	33	19	4	8	43	92	1	0	24	22	6	19	3	23	3	0	0	0	0	0	0	1	0	0	0	0	0	0	0	0	0	0
15	MH815268	p:Proteobacteria	f:Oxalobacteraceae(0.9900)	g:Undibacterium(0.9800)	s:Undibacterium_oligocarboniphilum(0.9800)		8	30	10	4	884	254	470	30	79	1429	604	1254	105	84	138	1264	499	75	6	6	11	2	3	2	7	1	1	0	0	78	2	11	27	1	1	6	134	0	8	1	1	1	1
16	MH815269	p:Bacteroidetes	f:Flavobacteriaceae(0.9800)	g:Apibacter (0.800)	s:Apibacter mensalis (0.8900)		0	0	0	45	0	0	0	0	2581	0	0	1	10464	0	0	0	1576	6153	0	0	0	0	0	0	0	0	0	0	0	0	0	0	0	0	0	0	0	0	0	0	0	0	0
17	MH815270	p:Proteobacteria	f:Pseudomonadaceae(1.0000)	g:Pseudomonas(1.0000)	s:Pseudomonas_antarctica(1.0000)		0	14	43	0	146	10794	561	2	0	38	1	90	5	3	0	108	121	4	0	0	2399	1	1	0	4	0	0	7	0	0	1	2	1	8	0	7	0	0	12	3	861	2237	7902
18	MH815271	p:Firmicutes	f:Staphylococcaceae(0.9900)	g:Staphylococcus(0.9900)	s:Staphylococcus_argenteus(0.8900)		0	62	0	0	1091	528	536	1	32	1076	7997	676	81	22	92	487	212	39	3	586	518	242	371	54	734	82	4	2	0	25	5	18	10	3	0	5	164	0	4	10	1	2	0
19	MH815272	p:Proteobacteria	f:Enterobacteriaceae(1.0000)	g:Hafnia(0.8800)	s:Hafnia_psychrotolerans(0.8000)	Gamma-E2	67	9	45	0	78	119	9	11	10	145	136	167	13	10	8	222	307	13	0	92	107	43	68	8	98	18	1	0	0	0	0	5	0	1	0	0	25	0	1	0	8047	6260	0
20	MH815273	p:Firmicutes	f:Lactobacillaceae(1.0000)	g:Lactobacillus(1.0000)	s:Lactobacillus_kimchicus(0.5200)	Lacto-5	0	0	0	0	1	0	13	14	0	0	26	28	0	0	0	1	0	0	0	486	0	140	0	0	0	2004	0	2090	0	11	0	0	2506	0	0	0	252	0	3	1370	538	6	0
21	MH815274	p:Proteobacteria	f:Enterobacteriaceae(1.0000)	g:Cosenzaea(1.0000)	s:Cosenzaea_myxofaciens(1.0000)		0	0	0	0	0	0	63	2	23	411	250	100	39	8	6	374	40	0	0	1153	1028	448	739	97	1251	203	8	0	0	0	4	0	1	0	0	0	36	0	2	0	2	0	0
22	MH815275	p:Proteobacteria	f:Lysobacteraceae(0.9800)	g:Thermomonas(0.7200)	s:Thermomonas_haemolytica(0.7200)		0	0	0	0	0	8	0	4	4	132	160	44	0	2	3	218	56	0	0	830	764	320	418	86	928	117	1	0	0	0	3	0	1	0	0	0	16	0	1	0	0	0	0
23	MH815276	p:Firmicutes	f:Lactobacillaceae(1.0000)	g:Lactobacillus(1.0000)	s:Lactobacillus_apis(0.3800)	Firm-5/Lacto-1	0	0	0	0	0	0	0	2	5	0	17	0	0	5	0	0	0	5	0	64	0	71	0	0	0	0	0	0	0	0	0	0	31	0	0	4141	1256	0	0	93	114	0	1
24	MH815277	p:Actinobacteria	f:Bifidobacteriaceae(1.0000)	g:Bifidobacterium(0.7500)	s:Bifidobacterium_coagulans(0.4900)	Bifido-3	0	2	0	6	0	0	1	115	0	0	0	0	0	0	0	0	0	0	0	0	0	2	0	0	0	0	4704	0	14	0	0	0	0	0	0	0	0	0	0	0	0	0	0
25	MH815278	p:Proteobacteria	f:Rhizobiaceae(0.7700)	g:Rhizobium(0.7700)	s:Rhizobium_pusense(0.6600)		3	175	633	0	228	191	672	18	85	445	78	513	66	18	39	284	801	39	10	5	17	1	4	0	5	1	0	1	0	43	8	89	52	7	0	8	207	0	1	1	1	3	4
26	MH815279	p:Firmicutes	f:Bacillaceae(0.9800)	g:Bacillus(0.9800)	s:Bacillus_aquimaris(0.9600)		125	0	0	0	0	46	10	0	4	132	133	0	7	5	0	0	0	4	0	906	803	343	589	80	886	113	1	0	0	0	1	0	3	0	0	1	0	0	0	1	1	0	0
27	MH815280	p:Proteobacteria	f:Pseudomonadaceae(0.8300)	g:Pseudomonas(0.6000)	s:Azotobacter_armeniacus(0.1900)		0	0	0	0	0	0	0	0	0	0	0	0	0	0	0	0	0	0	0	0	0	0	0	0	0	1	0	0	0	0	0	4	0	0	1	0	0	0	0	0	0	0	7671
28	MH815281	p:Actinobacteria	f:Streptomycetaceae(1.0000)	g:Streptomyces(0.9900)	s:Streptomyces_achromogenes_subsp._rubradiris(0.9800)		0	0	0	0	0	0	2	0	3	82	93	0	0	3	1	52	36	0	0	523	596	233	343	53	590	79	6	0	0	0	1	3	0	0	0	0	0	0	0	0	0	0	0
29	MH815282	p:Proteobacteria	f:Moraxellaceae(1.0000)	g:Enhydrobacter(1.0000)	s:Enhydrobacter_aerosaccus(1.0000)		0	0	0	0	0	36	40	0	23	140	0	109	23	0	34	43	0	26	0	0	2	0	1	0	3	0	0	0	0	12	0	1	0	1	0	0	14	1	0	0	0	0	0
30	MH815283	p:Bacteroidetes	f:Flavobacteriaceae(1.0000)	g:Flavobacterium(1.0000)	s:Flavobacterium_defluvii(0.3500)		12	943	2998	0	188	69	2	14	34	216	137	284	51	35	28	460	369	36	4	3	3	0	0	0	4	0	0	0	0	4	0	0	1	0	0	0	50	0	0	0	0	0	0
31	MH815284	p:Proteobacteria	f:Chromatiaceae(1.0000)	g:Rheinheimera(1.0000)	s:Rheinheimera_soli(0.9500)		6	251	1069	1	341	144	0	6	55	284	175	494	72	28	36	316	441	49	12	1	3	3	3	1	2	1	0	2	0	5	0	0	1	4	0	2	16	1	0	0	0	0	0
32	MH815285	p:Fusobacteria	f:Fusobacteriaceae(1.0000)	g:Fusobacterium(1.0000)	s:Fusobacterium_varium(0.9100)		0	0	0	0	0	0	1210	0	0	0	0	0	0	0	0	68	0	7	0	0	0	0	0	0	0	0	0	0	0	0	0	0	0	0	0	0	0	0	0	0	0	4	0
33	MH815286	p:Proteobacteria	f:Pseudomonadaceae(1.0000)	g:Pseudomonas(0.9900)	s:Pseudomonas_aeruginosa(0.9900)		1	31	160	1	122	43	37	4	33	145	141	122	66	21	16	329	365	17	1	283	324	104	235	32	319	43	3	0	0	2	0	0	1	0	0	1	0	0	0	0	0	1	1
34	MH815287	p:Bacteroidetes	f:Porphyromonadaceae(1.0000)	g:Parabacteroides(0.9600)	s:Parabacteroides_johnsonii(0.4200)		0	0	0	0	22	9	2189	0	6	1	0	51	0	0	0	78	0	3	0	0	0	0	0	0	1	0	0	0	0	0	0	0	0	0	0	0	0	0	0	0	0	2	0
35	MH815288	p:Firmicutes	f:Streptococcaceae(1.0000)	g:Streptococcus(1.0000)	s:Streptococcus_dentisani(0.9100)		2	1	0	0	144	158	184	4	14	370	77	335	40	26	30	302	87	7	1	1	0	0	1	1	0	0	3	3	0	17	0	12	2	1	0	3	61	0	1	2	0	2	0
36	MH815289	p:Bacteroidetes	f:Bacteroidaceae(1.0000)	g:Bacteroides(1.0000)	s:Bacteroides_caccae(0.3600)		0	0	0	0	0	13	678	0	0	0	0	0	0	0	3	0	12	0	0	0	0	0	0	0	0	0	0	0	0	0	0	0	0	0	0	0	0	0	0	0	0	1	0
37	MH815290	p:Firmicutes	f:Lactobacillaceae(0.4400)	g:Lactobacillus(0.4300)	s:Lactobacillus_mellifer(0.1600)	Lacto-4	0	0	0	0	0	0	0	0	0	0	0	0	0	0	0	0	0	0	0	0	0	0	0	0	0	0	0	0	0	0	1428	0	0	0	0	0	0	390	0	0	0	0	0
38	MH815291	p:Actinobacteria	f:Bifidobacteriaceae(1.0000)	g:Bifidobacterium(1.0000)	s:Bifidobacterium_bombi(0.3600)	Bifido-2	0	0	0	0	0	0	0	0	0	0	0	0	0	0	0	0	0	0	0	0	0	0	0	0	0	2715	0	1	0	0	0	0	0	0	0	0	0	0	10	0	21	0	0
39	MH815292	p:Proteobacteria	f:Lysobacteraceae(0.7800)	g:Stenotrophomonas(0.7400)	s:Stenotrophomonas_chelatiphaga(0.4600)		3	223	750	0	50	74	11	11	31	142	56	164	49	5	15	37	66	22	5	1	1	0	2	0	1	2	0	0	0	0	0	4	2	0	0	0	7	0	0	0	0	2	1
40	MH815293	p:Bacteroidetes	f:Porphyromonadaceae(0.8900)	g:Dysgonomonas(0.4900)	s:Dysgonomonas_macrotermitis(0.4200)		0	0	0	0	0	22	540	0	0	0	0	0	0	0	0	0	0	0	0	0	0	0	0	0	0	0	0	0	0	0	0	0	0	0	0	0	0	0	0	0	0	0	0
41	MH815294	p:Bacteroidetes	f:Porphyromonadaceae(0.9400)	g:Parabacteroides(0.7500)	s:Parabacteroides_johnsonii(0.3100)		0	0	0	0	0	45	1070	0	8	37	0	0	5	0	0	0	15	3	0	0	0	0	0	0	1	0	0	0	0	0	0	0	0	0	0	0	0	0	0	0	0	2	0
42	MH815295	p:Proteobacteria	f:Enterobacteriaceae(0.7700)	g:Photorhabdus(0.3800)	s:Photorhabdus_asymbiotica_subsp._australis(0.3500)		0	0	0	0	0	9	479	0	0	1	0	0	9	0	0	0	0	0	0	0	0	0	0	0	0	0	0	0	0	0	0	0	0	0	0	0	0	0	0	0	0	0	0
43	MH815296	p:Bacteroidetes	f:Flavobacteriaceae(1.0000)	g:Flavobacterium(1.0000)	s:Flavobacterium_nitratireducens(0.2700)		9	181	575	0	71	49	3	9	55	258	79	178	31	29	38	717	484	33	3	2	1	2	3	0	5	0	0	1	0	15	0	0	5	1	0	0	7	0	0	0	0	0	0
44	MH815297	p:Proteobacteria	f:Rickettsiaceae(1.0000)	g:Rickettsia(1.0000)	s:Rickettsia_aeschlimannii(1.0000)		0	1	0	0	0	0	0	0	0	0	0	0	0	17	11	0	40	0	0	0	0	0	0	0	0	0	0	0	0	0	0	0	0	0	0	0	0	0	0	0	0	0	0
45	MH815298	p:Bacteroidetes	f:Bacteroidaceae(0.9900)	g:Bacteroides(0.9900)	s:Bacteroides_luti(0.2800)		0	0	0	0	0	0	452	0	0	0	0	0	20	0	0	0	0	0	0	0	0	1	0	0	1	0	0	0	0	0	0	0	0	0	0	0	0	0	0	0	0	1	0
46	MH815299	p:Proteobacteria	f:Moraxellaceae(1.0000)	g:Acinetobacter(1.0000)	s:Acinetobacter_lwoffii(0.9000)		2	0	2	0	70	34	197	3	12	30	36	108	15	19	25	0	34	3	3	0	0	2	0	0	3	0	0	0	0	7	1	1	0	0	0	1	61	0	2	2	0	0	0
47	MH815300	p:Firmicutes	f:Bacillaceae(0.9100)	g:Lentibacillus(0.3200)	s:Oceanobacillus_limi(0.2200)		52	0	0	0	0	0	0	2092	180	0	0	0	0	0	0	0	0	0	0	0	0	0	0	0	0	0	0	0	0	0	0	0	0	0	0	0	0	0	0	0	0	0	0
48	MH815301	p:Bacteroidetes	f:Flavobacteriaceae(1.0000)	g:Flavobacterium(1.0000)	s:Flavobacterium_qiangtangense(0.8200)		5	271	875	0	35	9	2	5	24	81	93	60	0	8	32	61	92	12	2	0	0	0	0	0	1	0	0	0	0	0	0	0	0	0	0	0	0	0	0	0	0	0	0
49	MH815302	p:Proteobacteria	f:Sphingomonadaceae(1.0000)	g:Sphingobium(0.9900)	s:Sphingobium_fuliginis(0.8700)		2	110	377	1	211	44	0	6	32	276	160	241	71	10	15	178	458	21	0	1	6	1	0	0	2	0	0	1	0	0	0	2	0	0	0	0	0	0	1	0	2	0	0
50	MH815303	p:Proteobacteria	f:Bradyrhizobiaceae(1.0000)	g:Afipia(1.0000)	s:Afipia_broomeae(0.8900)		0	7	13	0	23	25	99	0	11	96	75	7	16	4	18	104	35	6	0	2	1	1	2	0	0	0	1	0	0	2	0	4	1	0	0	0	1	0	1	0	0	0	0
51	MH815304	p:Proteobacteria	f:Comamonadaceae(0.9900)	g:Hydrogenophaga(0.9300)	s:Hydrogenophaga_bisanensis(0.8500)		5	134	480	0	11	49	3	9	18	138	86	332	32	22	13	335	340	40	1	5	4	1	2	0	2	0	0	0	0	3	0	0	0	0	0	0	17	0	1	0	0	0	0
52	MH815305	p:Proteobacteria	f:Caulobacteraceae(1.0000)	g:Brevundimonas(1.0000)	s:Brevundimonas_lenta(0.7700)		0	207	793	0	143	75	2	4	14	35	0	111	11	7	9	132	139	18	0	0	1	0	1	0	0	0	0	0	0	0	0	1	0	2	0	0	0	0	0	0	0	0	0
53	MH815306	p:Proteobacteria	f:Pseudomonadaceae(1.0000)	g:Cellvibrio(1.0000)	s:Cellvibrio_fibrivorans(1.0000)		6	64	235	1	60	49	3	1	25	176	57	108	46	22	7	43	310	20	1	1	2	1	2	2	0	0	0	0	0	0	0	0	0	0	0	0	15	0	0	0	0	0	0
54	MH815307	p:Proteobacteria	f:Sphingomonadaceae(1.0000)	g:Sphingopyxis(0.9800)	s:Sphingopyxis_indica(0.6500)		0	79	308	0	17	69	0	2	12	174	13	242	11	6	4	116	32	14	0	113	94	34	85	13	126	12	0	0	0	0	0	0	0	0	0	0	0	0	0	0	0	0	0
55	MH815308	p:Actinobacteria	f:Corynebacteriaceae(1.0000)	g:Corynebacterium(1.0000)	s:Corynebacterium_tuberculostearicum(0.8100)		1	0	0	0	70	11	48	3	21	189	149	147	5	11	0	57	46	18	0	0	5	0	0	0	3	1	1	0	0	3	0	10	3	0	0	0	51	0	0	0	0	0	0
56	MH815309	p:Firmicutes	f:Enterococcaceae(1.0000)	g:Enterococcus(1.0000)	s:Enterococcus_cecorum(0.9700)		0	0	0	0	0	0	0	0	0	0	0	0	0	2	3	0	0	0	0	0	0	0	0	0	0	0	0	0	0	1	0	0	0	0	0	0	0	0	0	0	0	0	0
57	MH815310	p:Actinobacteria	f:Micrococcaceae(1.0000)	g:Arthrobacter(0.9900)	s:Arthrobacter_arilaitensis(0.7700)		0	0	0	0	11	0	0	0	2	0	0	1	0	5	0	0	0	0	0	0	0	0	0	0	0	0	0	0	0	0	0	16	3	0	0	1	275	0	0	0	0	2	0
58	MH815311	p:Actinobacteria	f:Micrococcaceae(1.0000)	g:Micrococcus(0.9000)	s:Micrococcus_aloeverae(0.9000)		0	0	0	0	68	15	31	2	19	79	42	101	10	17	25	116	46	2	0	0	0	0	0	0	2	0	0	0	0	0	0	0	0	0	0	0	0	0	0	0	0	0	0
59	MH815312	p:Proteobacteria	f:Comamonadaceae(0.9700)	g:Kinneretia(0.7300)	s:Kinneretia_asaccharophila(0.7300)		2	134	431	1	41	30	6	2	13	210	67	90	8	19	9	225	187	15	0	0	1	1	0	1	0	0	0	0	0	17	1	0	1	2	0	0	18	0	4	0	0	0	0
60	MH815313	p:Bacteroidetes	f:Porphyromonadaceae(0.9700)	g:Dysgonomonas(0.6500)	s:Dysgonomonas_gadei(0.3200)		0	0	0	0	0	6	278	0	0	0	0	0	0	0	0	0	0	0	0	0	0	0	0	0	0	0	0	0	0	0	0	0	0	0	0	0	0	0	0	0	0	0	0
61	MH815314	p:Firmicutes	f:Unclassified_Clostridiales(1.0000)	g:Finegoldia(1.0000)	s:Finegoldia_magna(1.0000)		1	4	0	0	0	0	5	0	8	404	0	0	0	0	29	0	32	0	0	0	0	0	0	0	0	0	1	0	0	0	0	0	0	1	0	0	103	0	0	0	0	0	0
62	MH815315	p:Bacteroidetes	f:Flavobacteriaceae(1.0000)	g:Cloacibacterium(1.0000)	s:Cloacibacterium_normanense(0.8900)		0	0	0	0	0	0	0	0	11	0	0	0	0	0	0	0	0	0	0	6	14	9	3	2	14	0	0	0	0	0	0	0	0	0	0	0	0	0	1	0	0	0	0
63	MH815316	p:Firmicutes	f:Streptococcaceae(1.0000)	g:Lactococcus(1.0000)	s:Lactococcus_formosensis(1.0000)		0	0	0	0	59	0	222	0	0	0	16	79	5	0	0	62	0	0	0	0	1	0	0	0	2	0	0	0	0	0	0	0	0	0	0	0	0	0	0	0	0	1	0
64	MH815317	p:Proteobacteria	f:Moraxellaceae(1.0000)	g:Psychrobacter(1.0000)	s:Psychrobacter_fozii(0.6300)		0	0	0	0	0	0	0	0	0	0	0	0	0	0	0	0	0	0	1	0	0	0	0	0	0	0	0	0	0	0	3	15	3	0	0	0	0	0	0	0	1	2	5
65	MH815318	p:Proteobacteria	f:Burkholderiaceae(0.7600)	g:Burkholderia(0.7600)	s:Burkholderia_soli(0.4200)		0	0	0	0	0	0	3	0	0	0	0	0	0	0	0	0	0	0	0	0	0	0	0	0	0	0	0	0	0	142	0	1	0	0	0	0	0	0	17	3	0	0	0
66	MH815319	p:Bacteroidetes	f:Cryomorphaceae(1.0000)	g:Fluviicola(1.0000)	s:Fluviicola_taffensis(0.7400)		0	66	191	0	8	11	0	5	34	99	67	479	22	26	30	234	173	14	0	0	0	1	0	0	3	0	0	0	0	3	0	0	0	0	0	0	13	0	0	0	0	0	0
67	MH815320	p:Actinobacteria	f:Dietziaceae(0.5800)	g:Dietzia(0.5800)	s:Dietzia_alimentaria(0.4500)		0	0	0	0	169	20	12	3	7	0	69	133	34	5	4	10	18	16	0	2	3	1	0	0	4	0	0	0	0	10	0	0	1	0	0	0	65	0	0	0	0	0	0
68	MH815321	p:Proteobacteria	f:Enterobacteriaceae(0.9800)	g:Pragia(0.3900)	s:Pragia_fontium(0.3900)		0	0	0	0	13	0	199	0	0	0	0	0	0	0	0	0	0	2	0	0	0	0	0	0	0	0	0	0	0	0	0	0	0	0	0	0	0	0	0	0	0	1	0
69	MH815322	p:Proteobacteria	f:Enterobacteriaceae(1.0000)	g:Morganella(1.0000)	s:Morganella_morganii_subsp._morganii(1.0000)		0	0	0	0	0	2	215	0	3	0	0	0	0	0	0	0	0	0	0	0	1	0	0	0	0	0	0	0	0	0	0	0	0	0	0	3	0	0	0	0	0	0	0
70	MH815323	p:Proteobacteria	f:Lysobacteraceae(1.0000)	g:Thermomonas(0.7100)	s:Thermomonas_brevis(0.7100)		1	120	469	0	51	15	0	1	7	112	32	0	16	0	11	130	153	21	0	2	2	0	1	1	1	0	0	0	0	0	0	0	0	0	0	1	0	0	0	0	0	0	0
71	MH815324	p:Bacteroidetes	f:Sphingobacteriaceae(0.4900)	g:Solitalea(0.2800)	s:Solitalea_canadensis(0.1700)		0	9	27	0	29	64	0	5	4	204	150	74	19	8	11	161	379	29	0	0	0	0	0	0	0	0	0	0	0	15	0	0	0	0	0	1	0	0	0	0	0	0	0
72	MH815325	p:Bacteroidetes	f:Cytophagaceae(1.0000)	g:Siphonobacter(1.0000)	s:Siphonobacter_aquaeclarae(1.0000)		0	0	0	0	0	0	1	0	9	0	0	0	7	0	0	0	0	0	0	62	62	28	54	7	61	4	0	0	0	0	0	0	0	0	0	0	0	0	0	0	0	0	0
73	MH815326	p:Proteobacteria	f:Pseudomonadaceae(0.9600)	g:Pseudomonas(0.6800)	s:Pseudomonas_aeruginosa(0.2200)		0	0	0	0	0	0	183	0	0	0	0	0	0	0	0	0	0	0	0	0	0	0	0	0	0	0	0	0	0	0	0	0	0	0	0	0	0	0	0	0	0	1	0
74	MH815327	p:Firmicutes	f:Unclassified_Bacillales(1.0000)	g:Gemella(1.0000)	s:Gemella_haemolysans(0.5600)		0	0	0	0	128	19	30	0	11	0	0	0	0	0	0	0	0	0	0	0	0	1	0	0	0	0	0	0	0	0	0	0	0	1	0	3	7	0	0	1	0	0	0
76	MH815328	p:Firmicutes	f:Listeriaceae(1.0000)	g:Brochothrix(1.0000)	s:Brochothrix_thermosphacta(0.8900)		0	0	0	0	0	0	0	0	0	0	0	39	0	0	0	0	0	0	0	1	0	0	0	0	0	0	0	0	0	0	1	12	5	0	0	0	22	0	0	0	0	0	1
77	MH815329	p:Proteobacteria	f:Bdellovibrionaceae(0.3100)	g:Vampirovibrio(0.3100)	s:Vampirovibrio_chlorellavorus(0.3100)		0	2	0	0	0	57	6	0	0	111	30	0	0	9	0	0	0	0	0	0	1	0	0	0	1	0	0	0	0	3	0	0	1	0	0	0	0	0	0	0	0	0	0
78	MH815330	p:Proteobacteria	f:Lysobacteraceae(1.0000)	g:Pseudoxanthomonas(1.0000)	s:Pseudoxanthomonas_japonensis(0.9900)		3	45	178	0	127	29	0	2	8	101	64	47	34	12	0	96	165	6	0	0	0	0	0	0	1	0	0	0	0	0	0	0	1	0	0	0	0	1	0	0	0	0	0
79	MH815331	p:Proteobacteria	f:Caulobacteraceae(1.0000)	g:Brevundimonas(1.0000)	s:Brevundimonas_nasdae(0.8700)		1	39	122	0	0	4	10	0	2	69	18	63	19	2	0	16	43	8	0	0	0	0	0	1	0	0	0	0	0	2	0	0	1	1	0	0	17	0	0	0	0	0	0
80	MH815332	p:Proteobacteria	f:Neisseriaceae(1.0000)	g:Neisseria(0.9900)	s:Neisseria_cinerea(0.9800)		1	0	0	0	23	34	32	3	6	0	0	49	6	0	4	0	0	0	0	0	0	0	0	0	0	0	0	1	0	9	0	1	0	0	0	1	24	0	0	0	0	0	0
81	MH815333	p:Bacteroidetes	f:Chitinophagaceae(1.0000)	g:Terrimonas(0.8500)	s:Terrimonas_arctica(0.4200)		0	34	75	0	18	51	0	10	39	41	91	241	15	6	15	106	199	16	1	0	0	0	0	0	0	0	0	0	0	6	0	0	0	0	0	0	0	0	0	0	1	0	0
82	MH815334	p:Proteobacteria	f:Pseudomonadaceae(1.0000)	g:Pseudomonas(1.0000)	s:Pseudomonas_psychrotolerans(0.7000)		0	0	0	0	0	56	7	0	21	0	31	321	22	0	11	185	25	0	0	0	0	0	0	0	0	0	0	0	0	0	0	0	0	0	0	0	0	0	0	0	0	0	0
83	MH815335	p:Actinobacteria	f:Microbacteriaceae(0.8500)	g:Agromyces(0.3500)	s:Agromyces_atrinae(0.2300)		0	0	1	0	0	0	15	0	0	0	0	0	0	0	4	0	0	0	0	0	0	0	0	0	0	0	0	0	0	0	0	0	0	0	0	0	0	0	0	0	0	0	0
84	MH815336	p:Proteobacteria	f:Rhizobiaceae(1.0000)	g:Rhizobium(1.0000)	s:Rhizobium_pseudoryzae(0.4300)		1	42	121	0	60	2	2	3	13	30	0	76	17	5	2	99	75	3	1	0	0	0	1	0	0	0	0	0	0	0	0	0	0	0	0	0	0	0	0	0	0	0	0
85	MH815337	p:Proteobacteria	f:Hydrogenophilaceae(1.0000)	g:Tepidiphilus(1.0000)	s:Tepidiphilus_succinatimandens(0.7100)		0	0	0	0	36	0	7	0	4	33	0	0	11	11	35	0	0	0	0	1	1	0	0	0	1	0	0	1	0	0	0	1	0	1	0	0	0	0	0	0	0	0	0
86	MH815338	p:Proteobacteria	f:Burkholderiaceae(1.0000)	g:Burkholderia(1.0000)	s:Burkholderia_ferrariae(0.7900)		0	0	0	0	0	17	138	0	0	0	0	0	0	0	0	0	0	3	0	0	0	0	0	0	0	0	0	0	0	0	0	0	0	0	0	0	0	0	0	0	0	1	0
87	MH815339	p:Actinobacteria	f:Micrococcaceae(1.0000)	g:Arthrobacter(1.0000)	s:Arthrobacter_aurescens(0.8500)		0	8	93	0	32	20	1	2	4	29	68	137	13	7	9	241	182	18	0	3	1	0	2	0	6	0	0	0	0	0	0	0	0	0	0	0	0	0	1	0	0	0	0
88	MH815340	p:Actinobacteria	f:Mycobacteriaceae(1.0000)	g:Mycobacterium(1.0000)	s:Mycobacterium_brumae(0.3200)		0	5	27	0	0	31	2	0	10	56	37	87	11	4	9	76	24	11	0	67	47	19	47	12	83	9	0	0	0	0	1	0	0	0	0	0	0	0	0	0	0	0	0
89	MH815341	p:Proteobacteria	f:Rhodanobacteraceae(1.0000)	g:Dyella(1.0000)	s:Dyella_terrae(0.8800)		0	0	0	0	32	5	154	0	0	0	0	0	0	0	0	0	0	0	0	0	0	0	0	0	0	0	0	0	0	0	0	0	0	0	0	0	0	0	0	0	0	0	0
90	MH815342	p:Proteobacteria	f:Burkholderiaceae(0.7400)	g:Burkholderia(0.6700)	s:Burkholderia_choica(0.3700)		0	0	0	0	0	0	0	0	0	0	0	0	0	0	0	0	0	0	0	0	0	0	0	0	0	0	0	0	0	69	0	0	0	0	0	0	0	0	12	6	0	0	0
91	MH815343	p:Actinobacteria	f:Micromonosporaceae(1.0000)	g:Micromonospora(0.5700)	s:Micromonospora_aurantiaca(0.5700)		0	0	0	0	0	0	1	0	0	136	9	0	6	0	5	0	0	5	0	37	35	15	35	4	47	4	0	0	0	0	0	0	0	0	0	0	0	0	0	0	0	0	0
92	MH815344	p:Proteobacteria	f:Succinivibrionaceae(0.2300)	g:Anaerobiospirillum(0.2300)	s:Anaerobiospirillum_thomasii(0.1400)		0	0	0	0	32	17	0	3	15	15	105	33	10	24	12	228	206	13	0	1	0	0	1	0	0	0	0	0	0	0	0	0	0	0	0	0	20	0	0	0	0	0	0
93	MH815345	p:Proteobacteria	f:Comamonadaceae(1.0000)	g:Acidovorax(1.0000)	s:Acidovorax_radicis(0.5600)		2	83	290	0	106	52	18	12	27	241	82	324	20	19	22	234	233	44	4	2	1	0	1	1	2	0	0	0	0	5	0	6	4	1	0	0	0	0	2	0	0	0	0
94	MH815346	p:Verrucomicrobia	f:Unclassified_Spartobacteria(0.6400)	g:Limisphaera(0.6300)	s:Limisphaera_ngatamarikiensis(0.6300)		0	105	408	0	0	0	0	0	8	36	34	0	0	0	0	0	9	2	0	0	0	0	0	0	0	0	0	0	0	0	0	0	0	0	0	0	0	0	0	0	0	0	0
95	MH815347	p:Proteobacteria	f:Unclassified_Burkholderiales(0.9900)	g:Aquabacterium(0.9900)	s:Aquabacterium_commune(0.9900)		1	20	71	0	0	15	0	0	4	44	38	149	31	4	4	136	31	9	2	0	1	0	0	0	2	0	0	0	0	0	0	0	0	0	0	0	13	0	0	0	0	0	0
96	MH815348	p:Proteobacteria	f:Caulobacteraceae(1.0000)	g:Asticcacaulis(1.0000)	s:Asticcacaulis_benevestitus(1.0000)		0	52	122	0	42	7	15	2	1	58	9	114	0	0	0	78	33	4	1	1	0	0	0	0	0	0	0	0	0	0	0	0	2	0	0	0	0	0	0	0	0	0	0
97	MH815349	p:Bacteroidetes	f:Porphyromonadaceae(0.9000)	g:Dysgonomonas(0.5400)	s:Dysgonomonas_macrotermitis(0.5200)		0	0	0	0	0	0	107	0	0	0	0	0	0	0	0	0	0	0	0	0	0	0	0	0	0	0	0	0	0	0	0	0	0	0	0	0	0	0	0	0	0	0	0
98	MH815350	p:Bacteroidetes	f:Porphyromonadaceae(0.9100)	g:Parabacteroides(0.4500)	s:Parabacteroides_johnsonii(0.1800)		0	0	0	0	0	0	121	0	0	0	0	0	0	0	0	0	0	0	0	0	0	0	0	0	0	0	0	0	0	0	0	0	0	0	0	0	0	0	0	0	0	0	0
99	MH815351	p:Bacteroidetes	f:Unclassified_Cytophagales(1.0000)	g:Ohtaekwangia(0.9400)	s:Ohtaekwangia_koreensis(0.9200)		1	2	5	0	37	20	0	4	42	154	7	108	14	14	7	77	127	17	0	1	1	0	0	0	0	0	0	0	0	0	1	0	0	0	0	0	0	0	0	0	0	0	0
100	MH815352	p:Proteobacteria	f:Bdellovibrionaceae(1.0000)	g:Bdellovibrio(1.0000)	s:Bdellovibrio_bacteriovorus(1.0000)		1	72	334	0	0	13	0	4	3	6	13	0	8	4	0	0	50	0	0	0	0	0	0	0	0	0	0	0	0	0	0	0	0	0	0	0	0	0	0	0	0	0	0
101	MH815353	p:Proteobacteria	f:Rhodanobacteraceae(1.0000)	g:Rhodanobacter(1.0000)	s:Rhodanobacter_thiooxydans(0.5500)		0	0	0	0	0	8	108	0	0	0	0	0	0	0	0	0	20	0	0	0	0	0	0	0	0	0	0	0	0	0	0	0	0	0	0	0	0	0	0	0	0	0	0
102	MH815354	p:Firmicutes	f:Peptoniphilaceae(1.0000)	g:Peptoniphilus(1.0000)	s:Peptoniphilus_gorbachii(1.0000)		0	0	0	0	0	0	4	0	0	70	0	83	0	0	35	0	0	0	0	0	0	0	0	0	0	0	0	0	0	0	0	0	0	0	0	0	0	0	0	0	0	0	0
103	MH815355	p:Bacteroidetes	f:Cytophagaceae(1.0000)	g:Dyadobacter(1.0000)	s:Dyadobacter_soli(0.9500)		0	59	270	0	44	5	2	0	11	31	24	79	7	0	0	39	122	7	3	0	1	0	0	0	0	0	0	0	0	0	0	0	0	0	0	0	0	0	0	0	0	0	0
104	MH815356	p:Proteobacteria	f:Desulfovibrionaceae(0.5400)	g:Desulfovibrio(0.5300)	s:Desulfovibrio_frigidus(0.1500)		0	0	0	0	0	12	119	0	0	0	0	0	0	0	0	0	0	0	0	0	0	0	0	0	0	0	0	0	0	0	0	0	0	0	0	0	0	0	0	0	0	0	0
105	MH815357	p:Bacteroidetes	f:Marinilabiliaceae(0.5900)	g:Alkalitalea(0.3900)	s:Alkalitalea_saponilacus(0.3900)		0	0	0	0	0	0	97	0	0	0	0	0	0	0	0	0	0	0	0	0	0	0	0	0	0	0	0	0	0	0	0	0	0	0	0	0	0	0	0	0	0	0	0
106	MH815358	p:Proteobacteria	f:Sphingomonadaceae(1.0000)	g:Sphingobium(0.9500)	s:Sphingobium_scionense(0.7000)		0	5	4	0	0	8	0	0	4	155	0	119	7	0	0	45	10	0	0	0	0	0	0	0	0	0	0	0	0	0	0	0	1	0	0	0	12	0	0	0	0	0	0
107	MH815359	p:Bacteroidetes	f:Chitinophagaceae(1.0000)	g:Chitinophaga(1.0000)	s:Chitinophaga_eiseniae(1.0000)		0	0	0	0	0	0	90	0	0	56	0	0	0	0	0	0	0	0	0	0	0	0	0	0	0	0	0	0	0	0	0	0	0	0	0	0	0	0	0	0	0	0	0
108	MH815360	p:Proteobacteria	f:Desulfovibrionaceae(1.0000)	g:Desulfovibrio(1.0000)	s:Desulfovibrio_cuneatus(0.9800)		0	0	0	0	0	0	91	0	0	73	0	0	0	0	0	0	0	0	0	0	0	0	0	0	1	0	0	0	0	0	0	0	0	0	0	0	0	0	0	0	0	0	0
109	MH815361	p:Bacteroidetes	f:Marinilabiliaceae(0.1900)	g:Mangroviflexus(0.1500)	s:Mangroviflexus_xiamenensis(0.1500)		0	19	59	0	43	76	0	0	1	34	63	127	0	4	11	51	80	1	0	0	0	0	0	0	0	0	0	0	0	0	0	0	0	0	0	0	0	0	0	0	0	0	0
110	MH815362	p:Proteobacteria	f:Burkholderiaceae(1.0000)	g:Cupriavidus(1.0000)	s:Cupriavidus_basilensis(0.9900)		1	36	158	0	0	38	0	6	2	142	28	59	22	7	8	153	208	9	0	0	4	0	2	0	0	0	0	0	0	0	0	0	0	0	0	0	0	0	0	0	0	0	0
111	MH815363	p:Bacteroidetes	f:Flavobacteriaceae(1.0000)	g:Chryseobacterium(1.0000)	s:Chryseobacterium_flavum(0.4300)		0	0	0	0	0	26	104	2	6	41	0	45	12	0	7	53	31	0	0	1	7	0	0	0	0	0	0	0	0	0	0	0	0	0	0	0	0	0	0	0	0	0	0
112	MH815364	p:Bacteroidetes	f:Chitinophagaceae(0.4900)	g:Chitinophaga(0.1900)	s:Chitinophaga_jiangningensis(0.1500)		0	69	267	0	0	16	0	1	0	220	33	0	25	2	9	0	17	5	0	1	1	0	0	0	0	0	0	0	0	0	0	0	0	0	0	0	0	0	0	0	0	0	0
113	MH815365	p:Bacteroidetes	f:Porphyromonadaceae(0.9700)	g:Parabacteroides(0.7800)	s:Parabacteroides_chinchillae(0.6600)		0	0	0	0	0	0	100	0	0	0	0	0	0	0	0	0	0	0	0	0	0	0	0	0	0	0	0	0	0	0	0	0	0	0	0	0	0	0	0	0	0	0	0
114	MH815366	p:Bacteroidetes	f:Chitinophagaceae(1.0000)	g:Arachidicoccus(0.6600)	s:Arachidicoccus_rhizosphaerae(0.6600)		0	0	0	0	0	0	109	0	0	0	0	0	0	0	0	0	0	0	0	0	0	0	0	0	0	0	0	0	0	0	0	0	0	0	0	0	0	0	0	0	0	1	0
115	MH815367	p:Proteobacteria	f:Oxalobacteraceae(1.0000)	g:Massilia(0.8100)	s:Massilia_alkalitolerans(0.6800)		0	17	87	0	12	25	24	1	16	34	32	74	6	2	15	84	119	11	0	0	3	0	0	0	2	0	0	0	0	2	0	0	0	0	0	0	0	0	0	0	1	0	0
116	MH815368	p:Proteobacteria	f:Hyphomicrobiaceae(1.0000)	g:Devosia(1.0000)	s:Devosia_insulae(1.0000)		0	22	80	0	0	15	7	0	18	112	43	48	14	2	1	51	86	0	0	0	3	0	1	0	0	0	0	0	0	0	0	3	0	0	0	0	0	0	0	0	0	0	0
117	MH815369	p:Bacteroidetes	f:Bacteroidaceae(0.9600)	g:Bacteroides(0.9600)	s:Bacteroides_cellulosilyticus(0.3300)		0	0	0	0	0	0	70	0	0	0	0	0	0	0	0	0	0	0	0	0	0	0	0	0	0	0	0	0	0	0	0	0	0	0	0	0	0	0	0	0	0	1	0
118	MH815370	p:Proteobacteria	f:Neisseriaceae(0.8100)	g:Neisseria(0.4800)	s:Neisseria_cinerea(0.4300)		0	0	0	0	0	14	6	5	0	61	46	171	8	8	0	0	64	7	0	0	0	0	0	0	2	0	0	0	0	0	0	0	0	1	0	0	0	0	0	0	0	0	0
119	MH815371	p:Proteobacteria	f:Methylophilaceae(1.0000)	g:Methylophilus(1.0000)	s:Methylophilus_flavus(1.0000)		0	24	82	0	12	46	0	1	9	87	31	157	27	3	10	33	61	10	1	0	1	0	0	1	0	0	0	0	0	10	0	0	2	0	0	0	0	0	1	0	0	0	0
120	MH815372	p:Proteobacteria	f:Pasteurellaceae(1.0000)	g:Haemophilus(0.6700)	s:Haemophilus_parainfluenzae(0.5600)		1	2	0	0	21	27	49	0	0	0	0	0	0	0	0	0	0	4	4	0	0	0	0	0	0	0	0	0	0	5	0	7	0	0	0	0	0	0	0	0	0	0	0
121	MH815373	p:Firmicutes	f:Bacillaceae(1.0000)	g:Bacillus(1.0000)	s:Bacillus_coagulans(0.7900)		0	0	0	0	0	0	3	0	0	0	0	0	0	0	0	0	0	0	0	0	0	0	0	0	0	0	0	0	0	0	0	0	0	0	0	0	0	0	0	0	0	0	0
122	MH815374	p:Firmicutes	f:Veillonellaceae(0.9900)	g:Veillonella(0.8700)	s:Veillonella_atypica(0.5100)		0	0	0	0	22	0	4	0	7	56	3	181	0	0	6	0	35	0	0	0	0	0	0	0	0	0	0	0	0	0	0	0	0	0	0	0	22	0	0	0	0	0	0
123	MH815375	p:Bacteroidetes	f:Rikenellaceae(0.8700)	g:Alistipes(0.8500)	s:Alistipes_finegoldii(0.6600)		0	0	0	0	0	0	93	0	0	0	0	0	0	2	0	0	0	0	0	0	0	0	0	0	0	0	0	0	0	0	0	0	0	0	0	0	0	0	0	0	0	0	0
124	MH815376	p:Proteobacteria	f:Psychromonadaceae(1.0000)	g:Psychromonas(1.0000)	s:Psychromonas_arctica(0.5100)		0	0	0	0	0	0	0	0	0	0	0	0	7	0	0	0	0	0	0	0	0	0	0	0	0	0	0	0	0	0	0	7	0	0	0	0	0	0	0	0	0	1	0
125	MH815377	p:Firmicutes	f:Clostridiaceae(0.5600)	g:Clostridium(0.3200)	s:Lactonifactor_longoviformis(0.2400)		0	0	0	0	0	0	51	0	0	0	0	0	0	0	0	0	0	0	0	0	0	0	0	0	0	0	0	0	0	0	0	0	0	0	0	0	0	0	0	0	0	0	0
126	MH815378	p:Bacteroidetes	f:Chitinophagaceae(1.0000)	g:Sediminibacterium(0.9100)	s:Sediminibacterium_salmoneum(0.7700)		0	7	6	0	19	20	0	0	18	149	25	0	20	0	16	138	93	4	1	0	0	0	0	0	0	0	0	0	0	2	0	0	1	0	0	0	0	0	0	0	0	0	0
127	MH815379	p:Firmicutes	f:Streptococcaceae(1.0000)	g:Streptococcus(1.0000)	s:Streptococcus_salivarius_subsp._salivarius(0.6200)		0	0	0	0	75	13	25	0	1	5	0	53	0	0	0	0	0	0	0	0	0	0	1	0	0	0	0	0	0	3	0	0	0	0	0	0	30	0	0	1	0	0	0
128	MH815380	p:Bacteroidetes	f:Porphyromonadaceae(0.9800)	g:Dysgonomonas(0.9800)	s:Dysgonomonas_macrotermitis(0.9400)		0	0	0	0	0	0	87	0	0	0	0	0	0	0	0	0	0	0	0	0	0	0	0	0	0	0	0	0	0	0	0	0	0	0	0	0	0	0	0	0	0	0	0
129	MH815381	p:Bacteroidetes	f:Rikenellaceae(0.9500)	g:Rikenella(0.4800)	s:Rikenella_microfusus(0.4800)		0	0	0	0	0	0	79	0	0	0	0	0	0	0	0	0	0	0	0	0	0	0	0	0	0	0	0	0	0	0	0	0	0	0	0	0	0	0	0	0	0	0	0
130	MH815382	p:Bacteroidetes	f:Flavobacteriaceae(1.0000)	g:Flavobacterium(1.0000)	s:Flavobacterium_ummariense(0.8600)		0	4	17	0	51	66	0	7	28	54	16	120	14	0	0	123	237	0	1	0	1	0	1	0	0	0	0	0	0	0	0	0	0	0	0	0	0	0	0	0	0	0	0
131	MH815383	p:Bacteroidetes	f:Chitinophagaceae(1.0000)	g:Sediminibacterium(0.9800)	s:Sediminibacterium_salmoneum(0.6600)		0	3	7	0	20	13	6	1	0	43	0	0	7	4	0	99	21	0	0	0	0	0	0	0	0	0	0	0	0	0	0	6	0	0	0	0	0	0	0	0	0	0	0
132	MH815384	p:Bacteroidetes	f:Porphyromonadaceae(1.0000)	g:Dysgonomonas(1.0000)	s:Dysgonomonas_hofstadii(0.8200)		0	0	0	0	0	6	68	0	0	0	0	75	0	0	0	0	0	0	0	0	0	0	0	0	0	0	0	0	0	0	0	0	0	0	0	0	0	0	0	0	0	0	0
133	MH815385	p:Proteobacteria	f:Methylobacteriaceae(1.0000)	g:Methylobacterium(1.0000)	s:Methylobacterium_brachiatum(0.9600)		0	0	0	0	29	0	4	0	0	91	0	0	0	0	9	0	0	3	0	0	0	0	0	0	1	0	0	0	0	0	0	6	0	0	0	0	0	0	0	0	0	0	0
134	MH815386	p:Bacteroidetes	f:Porphyromonadaceae(0.7900)	g:Dysgonomonas(0.7100)	s:Dysgonomonas_capnocytophagoides(0.3700)		0	0	0	0	0	0	82	0	0	0	0	0	0	0	0	0	0	0	0	0	0	0	0	0	0	0	0	0	0	0	0	0	0	0	0	0	0	0	0	0	0	0	0
135	MH815387	p:Actinobacteria	f:Micrococcaceae(0.9900)	g:Rothia(0.9500)	s:Rothia_mucilaginosa(0.7200)		0	1	0	0	0	0	70	0	0	19	0	0	6	11	6	0	0	1	0	0	0	0	0	0	0	0	0	0	0	2	0	0	0	0	0	0	49	0	0	0	0	1	0
136	MH815388	p:Firmicutes	f:Lactobacillaceae(1.0000)	g:Lactobacillus(1.0000)	s:Lactobacillus_iners(1.0000)		1	0	0	0	30	12	0	4	0	0	17	78	3	0	18	0	0	2	0	0	0	0	1	0	0	0	0	2	0	4	0	1	0	0	0	4	0	0	0	0	0	0	0
137	MH815389	p:Proteobacteria	f:Rhodobacteraceae(1.0000)	g:Paracoccus(0.8600)	s:Paracoccus_yeei(0.8000)		0	0	3	0	0	0	32	0	0	0	0	93	0	1	0	0	35	4	0	0	0	0	0	0	0	0	0	0	0	0	0	0	0	0	0	0	35	0	0	0	0	0	0
138	MH815390	p:Firmicutes	f:Bacillaceae(1.0000)	g:Bacillus(0.9800)	s:Bacillus_thermoamylovorans(0.7700)		0	0	0	0	0	0	0	0	0	12	0	0	0	0	0	0	0	0	0	0	0	0	0	0	0	0	0	0	0	0	0	0	0	0	0	0	0	0	0	0	0	0	0
139	MH815391	p:Proteobacteria	f:Caulobacteraceae(1.0000)	g:Phenylobacterium(1.0000)	s:Phenylobacterium_immobile(0.6600)		1	59	190	0	55	0	1	1	0	0	0	76	0	7	6	47	64	6	0	0	0	0	0	0	0	0	0	0	0	0	0	0	0	0	0	0	0	1	0	0	0	0	0
140	MH815392	p:Bacteroidetes	f:Unclassified_Cytophagales(0.8800)	g:Chryseolinea(0.8700)	s:Chryseolinea_serpens(0.8700)		0	1	6	0	33	9	0	0	18	138	17	42	0	8	7	60	36	13	0	0	0	0	0	0	0	0	0	0	0	0	0	0	0	0	0	0	0	0	0	0	0	0	0
141	MH815393	p:Firmicutes	f:Carnobacteriaceae(0.7900)	g:Granulicatella(0.7500)	s:Granulicatella_adiacens(0.6500)		0	0	0	0	28	0	81	0	0	175	0	0	3	6	13	49	16	0	0	0	5	0	0	0	0	0	0	0	0	0	0	0	0	0	0	0	0	0	0	1	0	0	0
142	MH815394	p:Bacteroidetes	f:Bacteroidaceae(0.8800)	g:Bacteroides(0.8800)	s:Bacteroides_luti(0.3000)		0	0	0	0	0	8	67	0	0	0	0	0	0	0	0	0	16	0	0	0	0	0	0	0	0	0	0	0	0	0	0	0	0	0	0	0	0	0	0	0	0	0	0
143	MH815395	p:Bacteroidetes	f:Porphyromonadaceae(1.0000)	g:Tannerella(0.4900)	s:Tannerella_forsythia(0.4900)		0	0	0	0	0	0	77	0	0	0	0	0	0	0	0	0	0	0	0	0	0	0	0	0	0	0	0	0	0	0	0	0	0	0	0	0	0	0	0	0	0	0	0
144	MH815396	p:Proteobacteria	f:Oxalobacteraceae(1.0000)	g:Duganella(1.0000)	s:Duganella_phyllosphaerae(1.0000)		0	22	88	0	0	9	5	1	4	48	0	126	8	2	0	38	10	0	0	0	0	0	0	0	0	0	0	0	0	0	0	0	0	0	0	0	0	0	0	0	0	0	0
145	MH815397	p:Bacteroidetes	f:Chitinophagaceae(0.9200)	g:Taibaiella(0.2700)	s:Niabella_aurantiaca(0.2100)		1	49	163	0	0	0	0	0	0	0	0	42	0	0	0	0	24	0	0	0	0	0	0	0	0	0	0	0	0	0	0	0	0	0	0	0	0	0	0	0	0	0	0
146	MH815398	p:Proteobacteria	f:Rhizobiaceae(0.9900)	g:Rhizobium(0.9900)	s:Rhizobium_cauense(0.9300)		1	77	271	0	54	74	10	3	25	87	55	86	14	7	7	87	162	5	0	0	0	1	0	0	1	0	0	0	0	0	0	0	0	0	0	0	0	0	2	0	0	0	0
147	MH815399	p:Bacteroidetes	f:Bacteroidaceae(0.5600)	g:Bacteroides(0.5600)	s:Alloprevotella_rava(0.3500)		0	0	0	0	0	56	0	0	0	58	0	0	0	0	0	0	0	0	0	3	1	0	0	0	0	0	0	0	0	0	0	0	0	0	0	0	29	0	0	0	0	0	0
148	MH815400	p:Proteobacteria	f:Burkholderiaceae(0.6200)	g:Burkholderia(0.5900)	s:Burkholderia_endofungorum(0.1900)		0	0	0	0	0	0	0	0	0	0	0	0	0	0	0	0	0	0	0	0	0	0	0	0	0	0	0	0	0	35	0	0	0	0	0	0	0	0	6	2	0	0	0
149	MH815401	p:Verrucomicrobia	f:Opitutaceae(0.9200)	g:Opitutus(0.7400)	s:Opitutus_terrae(0.7400)		0	0	0	0	0	6	0	2	0	33	14	114	0	0	0	92	50	0	0	0	0	0	0	0	0	0	0	0	0	0	0	0	0	0	0	0	0	0	0	0	0	0	0
150	MH815402	p:Proteobacteria	f:Enterobacteriaceae(1.0000)	g:Escherichia(0.6900)	s:Escherichia_coli(0.6700)		5	1	0	0	78	67	396	0	0	0	6	105	0	1	0	76	1	6	0	3	7	2	4	0	10	0	0	0	0	0	0	0	1	0	0	0	0	0	0	0	0	0	0
151	MH815403	p:Proteobacteria	f:Lysobacteraceae(0.9900)	g:Pseudoxanthomonas(0.9900)	s:Pseudoxanthomonas_taiwanensis(0.9600)		0	0	0	0	0	0	0	0	0	42	0	40	0	0	0	0	1	0	0	2	0	0	0	0	0	0	0	0	0	0	0	0	0	1	0	0	0	0	0	0	0	0	0
152	MH815404	p:Firmicutes	f:Veillonellaceae(1.0000)	g:Veillonella(1.0000)	s:Veillonella_dispar(0.7700)		0	0	0	0	41	85	15	0	7	0	31	69	14	0	0	0	0	4	0	0	0	0	1	0	0	0	0	0	0	12	0	9	0	0	0	1	0	0	1	1	0	0	0
153	MH815405	p:Bacteroidetes	f:Bacteroidaceae(0.9800)	g:Bacteroides(0.9800)	s:Bacteroides_luti(0.6900)		0	0	0	0	0	0	62	0	0	0	0	0	0	0	0	0	0	0	0	0	0	0	0	0	0	0	0	0	0	0	0	0	0	0	0	0	0	0	0	0	0	0	0
154	MH815406	p:Bacteroidetes	f:Cytophagaceae(1.0000)	g:Flectobacillus(1.0000)	s:Flectobacillus_roseus(1.0000)		0	18	71	0	24	10	0	0	0	0	0	76	0	7	0	0	14	4	0	0	1	0	0	1	0	0	0	0	0	0	0	0	0	0	0	0	0	0	0	0	0	0	0
155	MH815407	p:Bacteroidetes	f:Prevotellaceae(1.0000)	g:Prevotella(1.0000)	s:Prevotella_melaninogenica(0.9800)		0	0	0	0	32	180	6	0	0	55	0	0	0	0	0	0	37	0	0	0	0	0	0	0	0	0	0	0	0	8	0	4	0	0	0	0	0	0	0	0	0	0	0
156	MH815408	p:Proteobacteria	f:Desulfobacteraceae(0.6700)	g:Desulfosarcina(0.4100)	s:Desulfosarcina_ovata(0.3500)		0	0	0	0	0	0	72	0	0	0	0	0	0	0	0	0	0	0	0	0	0	0	0	0	0	0	0	0	0	0	0	0	0	0	0	0	0	0	0	0	0	0	0
157	MH815409	p:Bacteroidetes	f:Porphyromonadaceae(0.9400)	g:Parabacteroides(0.5200)	s:Parabacteroides_chinchillae(0.3800)		0	0	0	0	0	10	230	0	0	0	0	0	0	0	0	0	0	0	0	0	0	0	0	0	0	0	0	0	0	0	0	0	0	0	0	0	0	0	0	0	0	0	0
158	MH815410	p:Bacteroidetes	f:Chitinophagaceae(1.0000)	g:Flavihumibacter(0.9600)	s:Flavihumibacter_solisilvae(0.7300)		0	5	17	0	0	9	0	1	3	0	38	90	11	1	4	29	33	3	0	0	1	0	0	0	0	0	0	0	0	0	0	0	0	0	0	0	0	0	0	0	0	0	0
159	MH815411	p:Verrucomicrobia	f:Verrucomicrobiaceae(1.0000)	g:Verrucomicrobium(1.0000)	s:Verrucomicrobium_spinosum(1.0000)		0	10	25	0	0	0	0	1	4	61	0	0	0	0	0	61	0	0	0	0	0	0	0	0	0	0	0	0	0	0	0	0	0	0	0	0	0	0	0	0	0	0	0
160	MH815412	p:Proteobacteria	f:Methylococcaceae(0.9900)	g:Methylovulum(0.6000)	s:Methylovulum_miyakonense(0.6000)		0	0	0	0	0	0	0	0	0	0	0	0	0	0	0	0	0	0	0	0	0	0	0	0	0	0	0	0	0	47	0	0	0	0	0	0	0	0	6	0	0	0	0
161	MH815413	p:Verrumicrobia	f:Akkermansiaceae(0.7500)	g:Akkermansia(0.7500)	s:Akkermansia_muciniphila(0.7500)		0	0	0	0	0	0	64	0	0	0	0	0	0	0	0	0	0	0	0	0	0	0	0	0	0	0	0	0	0	0	0	0	0	0	0	0	0	0	0	0	0	0	0
162	MH815414	p:Proteobacteria	f:Caulobacteraceae(1.0000)	g:Phenylobacterium(0.6300)	s:Phenylobacterium_haematophilum(0.4000)		0	37	138	0	0	15	1	0	0	0	0	0	14	0	0	0	33	0	0	0	0	0	0	0	0	0	0	0	0	0	0	0	0	0	0	0	0	0	0	0	0	0	0
163	MH815415	p:Firmicutes	f:Clostridiaceae(0.8600)	g:Clostridium(0.8600)	s:Clostridium_leptum(0.6300)		0	0	0	0	0	0	58	0	0	0	0	0	0	0	0	0	0	0	0	0	0	0	0	0	0	0	0	0	0	0	0	0	0	0	0	0	0	0	0	0	0	1	0
164	MH815416	p:Actinobacteria	f:Corynebacteriaceae(1.0000)	g:Corynebacterium(1.0000)	s:Corynebacterium_coyleae(0.8400)		0	0	0	0	0	0	15	1	0	33	15	238	14	0	0	0	3	0	0	0	0	0	0	0	0	0	0	0	0	0	0	0	0	0	0	0	0	0	0	0	0	0	0
165	MH815417	p:Actinobacteria	f:Propionibacteriaceae(1.0000)	g:Propionibacterium(1.0000)	s:Propionibacterium_acnes(0.9900)		0	1	0	0	42	15	3	0	1	23	5	31	2	0	0	50	9	2	0	0	0	0	0	0	0	0	0	0	0	1	0	0	0	0	0	0	0	0	0	0	0	0	0
166	MH815418	p:Bacteroidetes	f:Rikenellaceae(0.7500)	g:Alistipes(0.5200)	s:Alistipes_indistinctus(0.5100)		0	0	0	0	0	0	48	0	0	0	0	0	0	0	0	0	0	0	0	0	0	0	0	0	0	0	0	0	0	0	0	0	0	0	0	0	0	0	0	0	0	0	0
168	MH815419	p:Firmicutes	f:Acidaminococcaceae(0.7200)	g:Acidaminococcus(0.6100)	s:Acidaminococcus_fermentans(0.5600)		0	0	0	0	0	0	54	0	0	0	0	0	0	0	0	0	17	0	0	0	0	0	0	0	0	0	0	0	0	0	0	0	0	0	0	0	0	0	0	0	0	0	0
169	MH815420	p:Bacteroidetes	f:Sphingobacteriaceae(1.0000)	g:Pedobacter(0.8800)	s:Pedobacter_rivuli(0.2800)		0	3	19	0	20	10	0	0	24	0	16	0	0	0	0	62	81	11	0	0	0	0	0	0	0	0	0	0	0	0	0	0	0	0	0	0	0	0	0	0	0	0	0
170	MH815421	p:Firmicutes	f:Carnobacteriaceae(1.0000)	g:Dolosigranulum(1.0000)	s:Dolosigranulum_pigrum(1.0000)		0	0	0	0	158	0	2	0	12	0	39	0	0	0	0	0	0	3	0	0	0	0	0	0	0	0	0	0	0	3	0	0	1	0	0	0	0	0	0	0	0	0	0
171	MH815422	p:Cyanobacteria	f:Stigonematales(0.7800)	g:Iphinoe(0.7200)	s:Iphinoe_spelaeobios(0.7200)		1	0	1	0	0	12	0	2	11	0	0	39	12	7	11	0	109	22	1	0	1	0	0	0	0	0	0	0	0	0	0	1	0	0	0	0	0	0	0	0	0	0	0
172	MH815423	p:Proteobacteria	f:Caulobacteraceae(1.0000)	g:Asticcacaulis(1.0000)	s:Asticcacaulis_endophyticus(0.9900)		0	41	156	0	18	7	0	0	0	0	0	0	0	0	0	29	29	2	0	0	0	0	0	0	0	0	0	0	0	0	0	0	0	1	0	0	0	0	0	0	0	0	0
173	MH815424	p:Proteobacteria	f:Rhodospirillaceae(1.0000)	g:Azospirillum(0.9500)	s:Azospirillum_irakense(0.9500)		0	0	4	0	0	0	0	0	2	116	16	0	13	0	0	0	56	11	1	0	2	1	0	0	1	0	0	0	0	0	0	0	3	0	0	0	0	0	0	0	0	0	0
174	MH815425	p:Actinobacteria	f:Actinomycetaceae(1.0000)	g:Actinomyces(1.0000)	s:Actinomyces_naeslundii(0.3700)		0	0	0	0	13	12	2	0	0	42	0	28	0	0	5	0	0	0	0	1	0	1	0	0	3	0	0	0	0	14	0	0	0	0	0	0	0	0	0	0	0	0	0
175	MH815426	p:Bacteroidetes	f:Cytophagaceae(1.0000)	g:Dyadobacter(1.0000)	s:Dyadobacter_arcticus(0.6000)		0	5	35	0	20	0	1	0	5	80	0	39	0	0	2	0	79	17	0	0	0	0	0	0	0	0	0	0	0	0	0	0	0	0	0	0	0	0	0	0	0	0	0
176	MH815427	p:Proteobacteria	f:Rhodobacteraceae(0.3600)	g:Hirschia(0.1400)	s:Hirschia_baltica(0.1400)		2	25	88	0	15	2	1	1	3	29	32	23	0	4	5	77	54	1	0	0	0	0	0	0	0	0	0	0	0	0	0	0	0	0	0	0	0	0	0	0	0	0	0
177	MH815428	p:Firmicutes	f:Unclassified_Clostridiales(0.2100)	g:Anaerococcus(0.1000)	s:Helcococcus_sueciensis(0.0700)		0	0	0	0	0	0	39	0	0	0	0	0	0	0	0	0	0	0	0	0	0	0	0	0	0	0	0	0	0	0	0	0	0	0	0	0	0	0	0	0	0	0	0
178	MH815429	p:Bacteroidetes	f:Flavobacteriaceae(1.0000)	g:Flavobacterium(1.0000)	s:Flavobacterium_beibuense(0.7000)		0	0	0	0	26	0	4	0	5	0	0	0	0	0	4	0	12	0	0	0	0	1	0	0	0	0	0	0	0	0	0	0	0	0	0	0	0	0	0	0	0	0	0
179	MH815430	p:Proteobacteria	f:Rhodobacteraceae(0.1200)	g:Clostridium(0.0900)	s:Henriciella_aquimarina(0.0700)		0	0	0	0	0	13	0	0	3	72	0	0	0	0	0	0	0	1	0	0	0	0	0	0	0	0	0	0	0	32	0	0	0	0	0	0	0	0	0	0	0	0	0
180	MH815431	p:Firmicutes	f:Unclassified_Clostridiales(1.0000)	g:Anaerococcus(1.0000)	s:Anaerococcus_octavius(1.0000)		0	0	0	0	34	0	0	0	0	59	0	0	0	0	5	0	0	0	0	1	0	0	0	0	0	0	0	0	0	0	0	0	0	0	0	0	0	0	0	0	0	0	0
181	MH815432	p:Firmicutes	f:Ruminococcaceae(0.9200)	g:Anaerofilum(0.6800)	s:Anaerofilum_agile(0.6800)		0	0	0	0	0	0	174	0	0	0	0	0	0	0	0	0	0	0	0	0	0	0	0	0	0	0	0	0	0	0	0	0	0	0	0	0	0	0	0	0	0	0	0
182	MH815433	p:Actinobacteria	f:Corynebacteriaceae(1.0000)	g:Corynebacterium(1.0000)	s:Corynebacterium_kroppenstedtii(1.0000)		0	0	0	0	0	0	1	0	2	0	8	75	7	0	0	129	0	0	0	0	0	0	0	0	0	0	0	0	0	0	0	0	0	0	0	0	7	0	0	0	0	0	0
183	MH815434	p:Bacteroidetes	f:Chitinophagaceae(1.0000)	g:Chitinophaga(1.0000)	s:Chitinophaga_terrae(1.0000)		0	0	0	0	0	0	60	0	0	0	0	0	0	0	0	0	0	0	0	0	0	0	0	0	0	0	0	0	0	0	0	0	0	0	0	0	0	0	0	0	0	0	0
184	MH815435	p:Proteobacteria	f:Burkholderiaceae(1.0000)	g:Burkholderia(1.0000)	s:Burkholderia_cepacia(0.4100)		0	2	0	0	0	0	60	0	0	0	0	0	0	0	0	0	0	0	0	0	0	0	0	0	0	0	0	0	0	0	0	0	0	0	0	0	0	0	0	0	0	0	0
185	MH815436	p:Firmicutes	f:Unclassified_Clostridiales(1.0000)	g:Anaerococcus(1.0000)	s:Anaerococcus_octavius(0.9700)		0	0	0	0	0	0	8	0	0	0	0	0	0	0	0	0	0	0	0	0	0	0	0	0	0	0	0	0	0	0	0	0	0	0	0	0	0	0	0	0	0	0	0
186	MH815437	p:Proteobacteria	f:Comamonadaceae(1.0000)	g:Ramlibacter(0.8800)	s:Ramlibacter_ginsenosidimutans(0.8800)		4	33	129	0	39	30	4	3	13	108	56	150	22	13	5	223	214	7	0	2	3	0	2	0	1	0	0	0	0	0	0	0	0	0	0	0	0	0	0	0	0	0	0
187	MH815438	p:Firmicutes	f:Unclassified_Clostridiales(1.0000)	g:Anaerococcus(1.0000)	s:Anaerococcus_prevotii(0.9000)		0	0	0	0	0	0	3	0	5	0	0	0	0	2	4	0	0	0	0	0	0	0	0	0	2	0	0	0	0	0	0	0	0	0	0	0	0	0	1	0	0	0	0
188	MH815439	p:Proteobacteria	f:Burkholderiaceae(1.0000)	g:Chitinimonas(1.0000)	s:Chitinimonas_prasina(1.0000)		0	5	37	0	19	4	0	0	2	37	16	0	15	0	0	0	26	1	0	0	0	1	0	0	0	0	0	0	0	0	0	0	0	0	0	0	0	0	0	0	0	0	0
189	MH815440	p:Firmicutes	f:Lactobacillaceae(1.0000)	g:Lactobacillus(1.0000)	s:Lactobacillus_furfuricola(0.5300)		0	0	0	0	0	10	72	0	0	0	0	0	0	0	0	0	0	0	0	0	0	0	0	0	0	0	0	0	0	0	0	0	0	0	0	0	0	0	0	0	0	1	0
190	MH815441	p:Bacteroidetes	f:Rikenellaceae(0.9800)	g:Alistipes(0.9800)	s:Alistipes_finegoldii(0.3900)		0	0	0	0	0	0	69	0	0	0	0	0	0	3	0	0	14	0	0	0	0	0	0	0	0	0	0	0	0	0	0	0	0	0	0	0	0	0	0	0	0	0	0
191	MH815442	p:Bacteroidetes	f:Flavobacteriaceae(1.0000)	g:Flavobacterium(1.0000)	s:Flavobacterium_cheonhonense(0.9900)		1	12	34	0	0	7	0	1	6	83	16	80	0	0	0	0	0	0	1	0	0	0	0	0	3	0	0	0	0	0	0	0	0	0	0	0	0	0	0	0	0	0	0
192	MH815443	p:Actinobacteria	f:Cellulomonadaceae(0.3200)	g:Actinotalea(0.3000)	s:Actinotalea_suaedae(0.3000)		0	0	0	0	0	0	0	1	0	77	0	0	14	12	5	0	0	0	0	0	0	0	0	0	0	0	0	0	0	2	0	0	0	0	0	0	0	0	0	1	0	0	0
193	MH815444	p:Proteobacteria	f:Oligoflexaceae(1.0000)	g:Oligoflexus(1.0000)	s:Oligoflexus_tunisiensis(1.0000)		0	0	0	0	21	50	0	3	3	0	0	0	17	2	0	36	136	6	0	0	0	0	1	0	0	0	0	0	0	0	0	0	0	0	0	0	0	0	0	0	0	0	0
194	MH815445	p:Firmicutes	f:Lactobacillaceae(1.0000)	g:Lactobacillus(1.0000)	s:Lactobacillus_apis(1.0000)		0	0	0	0	0	0	0	0	10	0	30	0	0	5	0	0	0	0	0	0	0	0	0	0	0	0	0	0	0	0	0	0	0	0	0	0	0	0	0	0	0	0	0
195	MH815446	p:Proteobacteria	f:Acetobacteraceae(1.0000)	g:Roseomonas(1.0000)	s:Roseomonas_lacus(0.9400)		1	2	12	0	0	7	0	2	7	0	0	27	0	0	0	81	66	0	1	0	0	0	0	0	0	0	0	0	0	0	0	0	0	0	0	0	0	0	0	0	0	0	0
196	MH815447	p:Proteobacteria	f:Sphingomonadaceae(1.0000)	g:Sphingomonas(1.0000)	s:Sphingomonas_aerolata(1.0000)		0	0	0	0	0	0	5	3	0	0	4	0	0	0	4	25	0	0	0	0	0	0	0	0	1	0	0	0	0	0	0	3	0	0	0	0	0	0	0	0	0	0	0
197	MH815448	p:Proteobacteria	f:Caulobacteraceae(1.0000)	g:Brevundimonas(1.0000)	s:Brevundimonas_diminuta(0.6800)		0	0	0	0	0	0	5	0	0	0	0	113	0	0	0	63	0	0	0	0	0	0	0	0	2	0	0	0	0	0	0	0	0	0	0	0	0	0	0	0	0	0	0
198	MH815449	p:Bacteroidetes	f:Rikenellaceae(0.8200)	g:Alistipes(0.7600)	s:Alistipes_finegoldii(0.5000)		0	0	0	0	0	0	35	0	0	0	0	0	0	0	0	0	0	0	0	0	0	0	0	0	0	0	0	0	0	0	0	0	0	0	0	0	24	0	0	0	0	0	0
199	MH815450	p:Firmicutes	f:Ruminococcaceae(0.8500)	g:Anaerofilum(0.6000)	s:Anaerofilum_agile(0.6000)		0	0	0	0	0	0	63	0	0	0	0	0	0	0	0	0	0	0	0	0	0	0	0	0	0	0	0	0	0	0	0	0	0	0	0	0	0	0	0	0	0	0	0
200	MH815451	p:Bacteroidetes	f:Bacteroidaceae(1.0000)	g:Bacteroides(1.0000)	s:Bacteroides_cellulosilyticus(0.5800)		0	0	0	0	0	0	23	0	0	0	0	0	0	0	0	0	0	0	0	0	0	0	0	0	0	0	0	0	0	0	0	0	0	0	0	0	0	0	0	0	0	0	0
201	MH815452	p:Actinobacteria	f:Corynebacteriaceae(1.0000)	g:Corynebacterium(1.0000)	s:Corynebacterium_aurimucosum(0.5700)		0	0	0	0	0	5	68	0	2	0	0	0	22	0	10	0	0	0	0	1	0	0	0	0	0	0	0	0	0	0	0	1	0	0	0	0	0	0	0	0	0	0	0
202	MH815453	p:Firmicutes	f:Unclassified_Clostridiales(0.6400)	g:Proteiniborus(0.6300)	s:Proteiniborus_ethanoligenes(0.6300)		2	0	0	0	30	0	0	1	0	0	0	0	0	0	0	0	0	0	0	0	0	0	0	0	0	0	0	0	0	0	0	0	0	0	0	0	13	0	0	0	0	0	0
203	MH815454	p:Bacteroidetes	f:Flavobacteriaceae(0.9900)	g:Moheibacter(0.6500)	s:Moheibacter_sediminis(0.6500)		0	0	2	0	17	7	0	0	2	0	35	186	3	0	0	0	29	0	0	0	0	0	0	0	0	0	0	0	0	0	0	0	0	0	0	0	0	0	0	0	0	0	0
204	MH815455	p:Proteobacteria	f:Brucellaceae(0.3000)	g:Bartonella(0.2700)	s:Bartonella_coopersplainsensis(0.2100)		0	0	0	0	0	0	34	0	0	0	0	0	0	0	0	0	0	0	0	0	0	0	0	0	0	0	0	0	0	0	0	0	0	0	0	0	0	0	0	0	0	1	0
205	MH815456	p:Proteobacteria	f:Sphingomonadaceae(1.0000)	g:Sphingomonas(1.0000)	s:Sphingomonas_hankookensis(0.3700)		0	3	16	0	14	13	23	0	4	41	3	0	0	0	4	111	73	2	0	0	0	0	0	0	2	0	0	0	0	0	0	0	0	0	0	0	0	0	0	0	0	0	0
206	MH815457	p:Bacteroidetes	f:Flavobacteriaceae(1.0000)	g:Chryseobacterium(1.0000)	s:Chryseobacterium_aquaticum(1.0000)		0	0	1	0	67	1	1	1	4	63	0	36	1	0	15	75	46	8	0	0	0	0	1	0	0	0	0	0	0	0	0	0	2	0	0	0	21	0	0	0	0	0	0
207	MH815458	p:Proteobacteria	f:Labilitrichaceae(0.9600)	g:Labilithrix(0.9600)	s:Labilithrix_luteola(0.9600)		0	0	0	0	0	13	0	0	0	0	0	0	0	0	2	0	20	0	0	0	0	0	0	0	0	0	0	0	0	0	0	0	0	0	0	0	0	0	0	0	0	0	0
208	MH815459	p:Planctomycetes	f:Planctomycetaceae(1.0000)	g:Blastopirellula(0.5500)	s:Blastopirellula_cremea(0.3100)		0	0	4	0	25	0	0	0	4	0	0	54	0	0	0	0	8	0	0	0	0	0	0	0	0	0	0	0	0	0	0	0	0	0	0	0	0	0	0	0	0	0	0
209	MH815460	p:Bacteroidetes	f:Chitinophagaceae(0.2700)	g:Paludibacter(0.2600)	s:Paludibacter_propionicigenes(0.2600)		0	3	15	0	0	10	0	5	0	0	0	0	0	0	0	0	51	0	0	0	0	1	1	0	0	0	0	0	0	0	0	4	0	0	0	0	0	0	0	0	0	0	0
210	MH815461	p:Proteobacteria	f:Polyangiaceae(0.8000)	g:Chondromyces(0.5800)	s:Chondromyces_apiculatus(0.3300)		0	0	0	0	0	3	3	0	0	0	14	0	0	3	0	0	28	2	0	0	0	0	0	0	0	0	0	0	0	1	0	0	0	0	1	0	0	0	0	0	0	0	0
211	MH815462	p:Bacteroidetes	f:Cytophagaceae(1.0000)	g:Cytophaga(1.0000)	s:Cytophaga_hutchinsonii(1.0000)		1	29	101	0	0	14	0	0	3	0	0	0	0	0	0	0	16	0	0	1	0	0	0	0	0	0	0	0	0	3	0	0	0	0	0	0	0	0	0	0	0	0	0
212	MH815463	p:Bacteroidetes	f:Rikenellaceae(0.7500)	g:Alistipes(0.5600)	s:Alistipes_finegoldii(0.3600)		0	0	0	0	0	0	39	0	0	0	0	0	0	0	0	0	0	0	0	0	0	0	0	0	0	0	0	0	0	0	0	0	0	0	0	0	0	0	0	0	0	0	0
213	MH815464	p:Bacteroidetes	f:Flavobacteriaceae(1.0000)	g:Flavobacterium(1.0000)	s:Flavobacterium_flevense(1.0000)		0	16	82	0	0	8	0	1	0	1	15	0	3	0	0	28	0	4	0	0	0	0	0	0	0	0	0	0	0	3	0	0	0	0	0	0	0	0	0	0	0	0	0
214	MH815465	p:Proteobacteria	f:Sphingomonadaceae(1.0000)	g:Sphingobium(1.0000)	s:Sphingobium_baderi(0.4700)		0	0	0	0	0	0	0	0	0	0	0	0	0	0	0	0	0	0	0	11	15	4	6	0	9	1	0	0	0	0	0	0	0	0	0	0	0	0	0	0	0	0	0
215	MH815466	p:Acidobacteria	f:Acidobacteriaceae(0.1600)	g:Caloramator(0.0700)	s:Bryocella_elongata(0.0500)		0	0	0	0	0	9	36	0	0	0	0	0	0	0	0	0	0	0	0	0	0	0	0	0	0	0	0	0	0	0	0	0	0	0	0	0	0	0	0	0	0	1	0
216	MH815467	p:Proteobacteria	f:Lysobacteraceae(0.9800)	g:Thermomonas(0.9500)	s:Thermomonas_fusca(0.9400)		0	17	54	0	16	0	0	0	0	0	18	0	0	0	0	0	0	0	0	0	0	0	0	0	0	0	0	0	0	0	0	0	0	0	0	0	0	0	0	0	0	0	0
217	MH815468	p:Proteobacteria	f:Aurantimonadaceae(0.8500)	g:Aureimonas(0.8400)	s:Aureimonas_altamirensis(0.3600)		0	0	0	0	0	0	1	0	0	0	0	62	0	0	12	0	0	0	0	0	0	0	0	0	0	0	0	0	0	0	0	0	0	0	0	0	0	0	0	0	0	0	0
218	MH815469	p:Firmicutes	f:Clostridiaceae(0.2000)	g:Clostridiisalibacter(0.0800)	s:Clostridiisalibacter_paucivorans(0.0800)		0	0	0	0	0	8	0	3	0	0	17	0	0	0	0	0	0	0	0	0	0	0	0	0	0	0	0	0	0	0	0	0	0	0	0	0	0	0	0	0	0	0	0
219	MH815470	p:Bacteroidetes	f:Rikenellaceae(0.9300)	g:Alistipes(0.8600)	s:Alistipes_onderdonkii(0.4100)		0	0	0	0	0	4	77	0	0	0	0	0	0	0	4	44	0	0	0	0	0	0	0	0	0	0	0	0	0	0	0	0	0	0	0	0	0	0	0	0	0	0	0
220	MH815471	p:Bacteroidetes	f:Chitinophagaceae(1.0000)	g:Ferruginibacter(0.4300)	s:Ferruginibacter_alkalilentus(0.2700)		1	1	17	0	16	0	0	4	1	50	0	0	0	6	5	0	35	0	0	0	0	0	0	0	0	0	0	0	0	0	0	0	1	0	0	0	0	0	0	0	0	0	0
221	MH815472	p:Chlamydiae	f:Parachlamydiaceae(0.9800)	g:Neochlamydia(0.6500)	s:Neochlamydia_hartmannellae(0.6500)		0	0	0	0	3	0	0	1	1	23	0	0	8	0	0	53	50	12	0	0	0	0	0	0	1	0	0	0	0	0	0	0	0	0	0	0	0	0	0	0	0	0	0
222	MH815473	p:Firmicutes	f:Ruminococcaceae(0.4500)	g:Clostridium(0.2700)	s:Mitsuokella_jalaludinii(0.1000)		0	0	0	0	0	0	40	0	0	0	0	0	0	0	0	0	0	0	0	0	0	0	0	0	0	0	0	0	0	0	0	0	0	0	0	0	0	0	0	0	0	0	0
223	MH815474	p:Firmicutes	f:Leuconostocaceae(1.0000)	g:Weissella(1.0000)	s:Weissella_cibaria(1.0000)		0	0	0	0	0	0	3	2	0	0	0	142	5	0	0	0	0	0	0	0	0	0	0	0	0	0	0	0	0	0	0	0	0	0	0	0	0	0	0	0	0	0	0
224	MH815475	p:Proteobacteria	f:Rhodobacteraceae(0.2900)	g:Paracoccus(0.1000)	s:Beijerinckia_doebereinerae(0.0900)		0	10	75	0	0	0	0	2	12	34	6	0	0	0	4	0	28	0	0	0	0	0	0	0	0	0	0	0	0	0	0	0	0	0	0	0	0	0	0	0	0	0	0
225	MH815476	p:Firmicutes	f:Acidaminococcaceae(0.6900)	g:Acidaminococcus(0.3700)	s:Acidaminococcus_fermentans(0.2800)		0	0	0	0	0	0	36	0	0	0	0	0	0	0	0	0	0	0	0	0	0	0	0	0	0	0	0	0	0	0	0	0	0	0	0	0	0	0	0	0	0	0	0
226	MH815477	p:Fusobacteria	f:Fusobacteriaceae(0.5500)	g:Fusobacterium(0.5500)	s:Filifactor_alocis(0.4500)		0	0	0	0	0	33	8	0	0	0	42	182	0	0	3	0	31	0	0	0	0	0	0	0	0	0	0	0	0	21	0	0	0	0	0	0	30	0	0	0	0	0	0
227	MH815478	p:Proteobacteria	f:Burkholderiaceae(0.8400)	g:Ralstonia(0.8400)	s:Ralstonia_insidiosa(0.8400)		0	3	4	0	0	0	6	0	4	18	8	0	3	0	0	0	0	0	0	0	0	0	0	0	0	0	0	0	0	0	0	0	0	0	0	0	0	0	0	0	0	0	0
228	MH815479	p:Verrucomicrobia	f:Opitutaceae(0.9900)	g:Opitutus(0.7500)	s:Opitutus_terrae(0.7500)		0	6	10	0	0	0	0	0	0	77	0	0	0	3	0	95	0	1	0	0	0	0	0	0	1	0	0	0	0	0	0	0	0	0	0	0	0	0	0	0	0	0	0
229	MH815480	p:Bacteroidetes	f:Sphingobacteriaceae(0.2500)	g:Olivibacter(0.2000)	s:Acetobacteroides_hydrogenigenes(0.1600)		0	0	0	0	0	0	33	0	0	0	0	0	0	0	0	0	0	0	0	0	0	0	0	0	0	0	0	0	0	0	0	0	0	0	0	0	0	0	0	0	0	0	0
230	MH815481	p:Proteobacteria	f:Lysobacteraceae(1.0000)	g:Luteimonas(1.0000)	s:Luteimonas_aquatica(0.9900)		0	0	0	0	0	7	0	1	2	39	8	104	3	0	7	0	24	6	0	0	0	0	0	0	0	0	0	0	0	0	0	0	0	0	0	0	0	0	0	0	0	0	0
231	MH815482	p:Actinobacteria	f:Bifidobacteriaceae(1.0000)	g:Bifidobacterium(1.0000)	s:Bifidobacterium_animalis_subsp._animalis(0.9900)		0	0	0	0	0	0	0	0	0	0	0	0	0	0	0	0	0	0	0	0	0	0	0	0	0	0	0	0	0	0	0	0	1	0	0	0	0	0	0	0	0	0	0
232	MH815483	p:Proteobacteria	f:Unclassified_Rhodospirillales(1.0000)	g:Reyranella(1.0000)	s:Reyranella_massiliensis(0.7400)		0	10	63	0	35	11	1	1	8	74	14	15	3	5	0	0	33	0	0	1	0	0	0	0	0	0	0	0	0	0	0	0	0	0	0	0	0	0	0	0	0	0	0
233	MH815484	p:Bacteroidetes	f:Sphingobacteriaceae(1.0000)	g:Pedobacter(0.9900)	s:Pedobacter_agri(0.9900)		2	6	20	0	66	8	3	4	3	40	33	0	3	6	0	0	79	6	0	0	0	0	0	0	0	0	0	0	0	0	1	0	0	0	0	0	2	0	0	0	0	0	0
234	MH815485	p:Cyanobacteria	f:Stigonematales(0.5300)	g:Iphinoe(0.3500)	s:Iphinoe_spelaeobios(0.3500)		5	101	263	0	91	36	11	3	18	98	32	113	11	16	18	182	175	7	3	2	1	0	2	1	3	0	0	0	0	2	4	2	1	0	0	0	4	2	0	0	0	0	0
235	MH815486	p:Firmicutes	f:Paenibacillaceae(1.0000)	g:Paenibacillus(1.0000)	s:Paenibacillus_liaoningensis(1.0000)		0	0	0	0	0	28	0	0	6	73	45	24	6	6	3	28	97	0	0	0	0	0	0	1	0	0	0	0	0	0	0	0	1	0	0	0	0	0	0	0	0	0	0
236	MH815487	p:Actinobacteria	f:Streptomycetaceae(0.3200)	g:Demequina(0.2100)	s:Demequina_lutea(0.2000)		0	0	0	0	0	0	0	0	4	0	30	29	0	0	0	0	0	0	0	0	0	0	1	0	0	0	0	0	0	4	0	0	0	2	0	0	0	0	0	0	0	0	0
237	MH815488	p:Actinobacteria	f:Pseudonocardiaceae(1.0000)	g:Actinokineospora(0.9600)	s:Actinokineospora_bangkokensis(0.8700)		0	0	0	0	0	0	0	1	11	0	0	40	0	0	0	96	0	0	0	0	0	0	0	0	0	0	0	0	0	0	0	0	0	0	0	0	0	0	0	0	0	0	0
238	MH815489	p:Bacteroidetes	f:Cryomorphaceae(1.0000)	g:Fluviicola(1.0000)	s:Fluviicola_taffensis(0.7800)		0	6	15	0	0	0	0	0	0	0	0	0	0	0	0	0	6	0	0	0	2	0	1	0	0	0	0	0	0	0	0	0	0	0	0	0	0	0	0	0	0	0	0
239	MH815490	p:Firmicutes	f:Clostridiaceae(0.4400)	g:Clostridium(0.4100)	s:Gracilibacter_thermotolerans(0.3000)		0	0	0	0	0	6	29	0	0	0	0	0	0	0	0	0	0	0	0	0	0	0	0	0	0	0	0	0	0	0	0	0	0	0	0	0	0	0	0	0	0	0	0
240	MH815491	p:Bacteroidetes	f:Ignavibacteriaceae(0.1600)	g:Ignavibacterium(0.1600)	s:Ignavibacterium_album(0.1600)		1	1	6	0	12	0	1	0	10	25	9	0	11	3	9	40	37	2	0	0	0	0	0	0	1	0	0	0	0	0	0	0	0	0	0	0	0	0	0	0	0	0	0
241	MH815492	p:Proteobacteria	f:Sphingomonadaceae(0.8900)	g:Sphingorhabdus(0.7000)	s:Sphingorhabdus_arenilitoris(0.4600)		0	0	0	0	0	0	0	0	0	128	17	82	15	0	22	24	0	0	0	0	0	0	0	0	0	0	0	0	0	0	0	0	0	0	0	0	0	0	0	0	0	0	0
243	MH815493	p:Verrucomicrobia	f:Unclassified_Spartobacteria(0.4500)	g:Limisphaera(0.4500)	s:Limisphaera_ngatamarikiensis(0.4500)		0	0	0	0	11	0	0	1	0	72	12	71	0	0	0	17	15	0	0	0	0	0	0	0	0	0	0	0	0	0	0	0	0	0	0	0	0	0	0	0	0	0	0
244	MH815494	p:Proteobacteria	f:Hyphomicrobiaceae(0.9900)	g:Hyphomicrobium(0.9800)	s:Hyphomicrobium_vulgare(0.7700)		0	10	41	0	21	0	2	1	0	2	66	14	8	0	0	127	108	3	0	0	2	0	0	0	0	0	0	0	0	0	0	0	0	0	0	0	0	0	0	0	0	0	0
245	MH815495	p:Bacteroidetes	f:Rikenellaceae(0.8900)	g:Alistipes(0.8200)	s:Alistipes_finegoldii(0.4500)		0	0	0	0	0	0	28	0	0	0	0	0	0	0	0	0	0	0	0	0	0	0	0	0	0	0	0	0	0	0	0	0	0	0	0	0	0	0	0	0	0	0	0
247	MH815496	p:Proteobacteria	f:Geminicoccaceae	g:Geminicoccus(0.9500)	s:Geminicoccus_roseus(0.9500)		0	0	0	0	30	0	0	0	0	0	0	0	0	0	0	61	0	0	0	0	0	0	0	0	0	1	0	0	0	0	0	0	0	0	0	0	0	0	0	0	0	0	0
248	MH815497	p:Proteobacteria	f:Comamonadaceae(0.9600)	g:Acidovorax(0.4900)	s:Curvibacter_gracilis(0.2600)		0	9	35	0	0	29	4	1	6	48	0	0	14	0	7	1	120	13	4	0	0	0	0	0	0	0	0	0	0	0	0	0	0	0	0	0	0	0	2	0	0	0	0
249	MH815498	p:Proteobacteria	f:Pseudoalteromonadaceae(1.0000)	g:Pseudoalteromonas(1.0000)	s:Pseudoalteromonas_agarivorans(0.9800)		0	0	0	0	0	0	0	0	1	0	30	0	0	0	0	0	0	3	0	0	0	0	0	1	0	0	0	0	0	0	0	0	0	0	0	0	53	0	0	0	0	0	0
250	MH815499	p:Bacteroidetes	f:Rikenellaceae(1.0000)	g:Alistipes(1.0000)	s:Alistipes_onderdonkii(0.7600)		0	0	0	0	0	0	31	0	0	0	0	0	0	0	0	0	0	0	0	0	0	0	0	0	0	0	0	0	0	0	0	0	0	0	0	0	0	0	0	0	0	0	0
251	MH815500	p:Firmicutes	f:Unclassified_Clostridiales(0.1700)	g:Gallicola(0.0800)	s:Gallicola_barnesae(0.0800)		0	0	0	0	0	0	1	107	3	0	0	0	0	0	0	0	0	0	2	0	0	8	0	0	0	7	0	0	0	0	0	0	0	0	0	0	0	0	0	0	0	0	0
252	MH815501	p:Proteobacteria	f:Desulfovibrionaceae(0.9100)	g:Desulfovibrio(0.8700)	s:Desulfovibrio_cuneatus(0.6400)		0	0	0	0	0	0	29	0	0	0	0	0	0	0	0	0	0	0	0	0	0	0	0	0	0	0	0	0	0	0	0	0	0	0	0	0	0	0	0	0	0	0	0
254	MH815502	p:Proteobacteria	f:Desulfovibrionaceae(0.9300)	g:Desulfovibrio(0.9300)	s:Desulfovibrio_litoralis(0.4500)		0	0	0	0	0	0	18	0	0	0	0	0	0	0	0	0	0	0	0	0	0	0	0	0	0	0	0	0	0	0	0	0	0	0	0	0	0	0	0	0	0	0	0
255	MH815503	p:Firmicutes	f:Unclassified_Clostridiales(0.1000)	g:Spiroplasma(0.0900)	s:Gallicola_barnesae(0.0800)		0	8	36	0	0	0	0	0	0	0	0	0	0	6	0	0	0	0	0	0	0	0	0	0	0	0	0	0	0	0	0	0	0	0	0	0	0	0	0	0	0	0	0
256	MH815504	p:Proteobacteria	f:Phyllobacteriaceae(1.0000)	g:Aminobacter(1.0000)	s:Aminobacter_aganoensis(1.0000)		0	14	44	0	35	23	3	0	5	0	48	14	0	3	0	49	1	0	0	0	0	0	0	0	0	0	0	1	0	0	0	0	0	0	0	0	0	0	0	0	0	0	0
257	MH815505	p:Proteobacteria	f:Hyphomicrobiaceae(1.0000)	g:Devosia(1.0000)	s:Devosia_limi(0.6600)		0	1	3	0	10	0	0	0	0	45	11	0	0	0	0	0	0	0	0	0	0	0	0	0	0	0	0	0	0	0	0	0	0	0	0	0	0	0	0	0	0	0	0
258	MH815506	p:Proteobacteria	f:Neisseriaceae(0.6100)	g:Neisseria(0.2000)	s:Neisseria_cinerea(0.1400)		0	0	0	0	0	0	0	0	0	119	0	0	0	0	0	0	0	0	0	0	0	0	0	0	0	0	0	0	0	0	0	0	0	0	0	0	0	0	0	0	0	0	0
259	MH815507	p:Proteobacteria	f:Bdellovibrionaceae(0.3400)	g:Vampirovibrio(0.3400)	s:Vampirovibrio_chlorellavorus(0.3400)		0	0	0	0	0	6	0	0	0	60	40	134	0	0	1	0	0	0	0	0	0	0	0	0	0	0	0	0	0	0	0	0	0	0	0	0	0	0	0	0	0	0	0
260	MH815508	p:Actinobacteria	f:Microbacteriaceae(1.0000)	g:Lysinimonas(0.8200)	s:Lysinimonas_soli(0.8200)		0	9	43	0	46	9	2	2	9	104	14	62	4	0	2	131	83	12	0	0	0	0	0	0	0	0	0	0	0	0	0	4	0	0	0	0	0	0	0	0	0	0	0
261	MH815509	p:Bacteroidetes	f:Chitinophagaceae(1.0000)	g:Chitinophaga(0.2900)	s:Parasegetibacter_terrae(0.2600)		0	25	104	0	4	0	0	0	0	0	0	0	0	3	0	0	0	0	0	0	0	0	1	0	0	0	0	0	0	0	0	0	0	0	0	0	0	0	0	0	0	0	0
262	MH815510	p:Firmicutes	f:Aerococcaceae(1.0000)	g:Aerococcus(1.0000)	s:Aerococcus_urinaeequi(0.9900)		0	0	0	0	0	7	15	0	0	0	0	0	0	0	6	0	0	0	0	0	2	0	0	0	0	0	0	0	0	6	0	1	1	0	0	0	0	0	0	0	0	0	0
263	MH815511	p:Proteobacteria	f:Pseudomonadaceae(1.0000)	g:Pseudomonas(1.0000)	s:Pseudomonas_cichorii(0.8300)		0	36	12	0	0	8	112	0	626	92	4612	1658	480	9	5	272	62	33	0	0	63	0	1	0	0	0	0	1	0	13	0	6	5	0	0	0	0	0	0	0	4	8	31
264	MH815512	p:Proteobacteria	f:Rhodobacteraceae(1.0000)	g:Paracoccus(0.6400)	s:Paracoccus_aestuarii(0.6400)		0	5	39	0	0	11	4	0	1	0	0	84	1	17	13	0	44	15	2	0	0	0	0	0	0	0	0	0	0	0	0	0	0	0	0	0	0	0	0	0	0	0	0
265	MH815513	p:Proteobacteria	f:Lysobacteraceae(1.0000)	g:Pseudoxanthomonas(1.0000)	s:Pseudoxanthomonas_dokdonensis(1.0000)		0	0	6	0	0	19	1	1	0	35	0	0	16	0	0	0	10	0	0	0	0	0	0	0	0	0	0	0	0	0	0	0	0	0	0	0	0	0	0	0	0	0	0
266	MH815514	p:Proteobacteria	f:Methylobacteriaceae(1.0000)	g:Methylobacterium(1.0000)	s:Methylobacterium_bullatum(0.6000)		0	0	0	0	0	0	3	0	0	0	0	0	0	0	0	104	0	0	0	0	0	0	0	0	1	0	0	0	0	0	0	0	0	0	0	0	0	0	0	0	0	0	0
267	MH815515	p:Actinobacteria	f:Actinomycetaceae(1.0000)	g:Actinomyces(1.0000)	s:Actinomyces_gerencseriae(0.4000)		0	0	0	0	21	0	1	1	1	0	0	0	0	0	0	0	0	0	0	0	0	0	0	0	0	0	0	0	0	0	0	0	0	0	0	0	0	0	0	0	0	0	0
270	MH815516	p:Firmicutes	f:Clostridiaceae(0.7300)	g:Clostridium(0.6700)	s:Clostridium_celerecrescens(0.1900)		0	0	0	0	0	0	59	0	0	0	0	0	0	0	0	0	0	0	0	0	0	0	0	0	0	0	0	0	0	0	0	2	0	0	0	0	0	0	0	0	0	0	0
271	MH815517	p:Proteobacteria	f:Thiotrichaceae(0.9900)	g:Thiothrix(0.9900)	s:Thiothrix_unzii(0.9800)		0	0	0	0	0	0	0	0	0	0	0	0	0	0	0	0	0	0	0	0	0	0	0	0	0	0	0	0	0	23	0	0	0	0	0	0	0	0	0	0	0	0	0
272	MH815518	p:Proteobacteria	f:Pseudomonadaceae(1.0000)	g:Pseudomonas(1.0000)	s:Pseudomonas_hibiscicola(0.7500)		0	0	0	0	0	0	24	0	0	0	0	0	7	0	0	0	0	0	0	0	1	0	0	0	0	0	0	0	0	0	0	0	0	0	0	0	0	0	0	0	0	0	0
273	MH815519	p:Proteobacteria	f:Micropepsaceae	g:Rhizomicrobium(0.6200)	s:Rhizomicrobium_electricum(0.5300)		0	1	5	0	0	0	11	0	12	0	0	0	0	5	1	0	16	0	0	0	0	0	0	0	0	0	0	0	0	0	0	2	0	0	0	0	0	0	0	0	0	0	0
274	MH815520	p:Verrucomicrobia	f:Verrucomicrobiaceae(1.0000)	g:Prosthecobacter(0.8800)	s:Prosthecobacter_debontii(0.8300)		1	16	27	0	50	7	0	0	0	0	0	0	0	0	0	0	45	2	0	0	0	0	0	0	0	0	0	0	0	0	0	0	0	0	0	0	0	0	0	0	0	0	0
276	MH815521	p:Firmicutes	f:Unclassified_Clostridiales(1.0000)	g:Anaerococcus(1.0000)	s:Anaerococcus_vaginalis(0.8500)		0	0	0	0	36	0	1	0	1	0	0	0	0	0	3	0	0	0	0	0	0	0	0	0	1	0	0	0	0	0	0	0	0	0	0	0	0	0	0	0	1	0	0
278	MH815522	p:Firmicutes	f:Bacillaceae(1.0000)	g:Bacillus(1.0000)	s:Bacillus_anthracis(1.0000)		0	0	0	0	50	29	348	0	43	221	36	65	34	19	10	114	32	8	0	1	5	1	0	0	0	0	0	0	0	14	0	4	1	1	0	0	0	0	0	1	0	0	0
279	MH815523	p:Bacteroidetes	f:Bacteroidaceae(0.8100)	g:Bacteroides(0.8100)	s:Bacteroides_acidifaciens(0.3800)		0	0	0	0	0	0	26	0	0	0	0	0	0	0	0	0	0	0	0	0	0	0	0	0	0	0	0	0	0	0	0	0	0	0	0	0	0	0	0	0	0	0	0
280	MH815524	p:Bacteroidetes	f:Chitinophagaceae(1.0000)	g:Taibaiella(1.0000)	s:Taibaiella_smilacinae(1.0000)		0	8	11	0	1	0	0	0	16	0	17	0	0	0	9	35	24	4	0	0	0	0	0	0	0	0	0	0	0	0	0	0	0	0	0	0	0	0	0	0	0	0	0
281	MH815525	p:Proteobacteria	f:Bdellovibrionaceae(1.0000)	g:Vampirovibrio(1.0000)	s:Vampirovibrio_chlorellavorus(1.0000)		0	0	0	0	11	15	0	0	0	14	14	0	0	0	2	35	0	4	0	0	0	0	0	0	0	0	0	0	0	0	0	0	0	0	0	0	0	0	0	0	0	0	0
282	MH815526	p:Firmicutes	f:Lactobacillaceae(1.0000)	g:Lactobacillus(1.0000)	s:Lactobacillus_acidophilus(0.9900)		0	0	0	0	37	0	5	1	0	0	0	0	0	0	0	0	0	0	0	0	0	0	0	0	0	0	0	0	0	0	0	0	0	0	0	0	0	0	0	0	0	0	0
283	MH815527	p:Proteobacteria	f:Acetobacteraceae(0.1700)	g:Caedibacter(0.1100)	s:Caedibacter_caryophilus(0.1100)		0	1	5	0	0	0	0	0	0	0	0	0	0	0	0	0	0	0	0	0	0	0	0	0	0	0	0	0	0	0	0	0	0	0	0	0	0	0	0	0	0	0	0
284	MH815528	p:Proteobacteria	f:Bacteriovoracaceae(0.9900)	g:Bacteriovorax(0.9900)	s:Bacteriovorax_stolpii(0.9900)		0	1	5	0	0	2	1	0	0	0	18	0	0	0	0	57	0	0	0	0	0	0	0	0	0	0	0	0	0	3	0	0	0	0	0	0	0	0	0	0	0	0	0
285	MH815529	p:Firmicutes	f:Clostridiaceae(0.2600)	g:Desulfosporosinus(0.1400)	s:Desulfosporosinus_acididurans(0.1000)		0	0	0	0	0	0	21	0	0	0	0	0	0	0	0	0	0	0	0	0	0	0	0	0	0	0	0	0	0	0	0	0	0	0	0	0	0	0	0	0	0	0	0
286	MH815530	p:Fusobacteria	f:Leptotrichiaceae(1.0000)	g:Leptotrichia(1.0000)	s:Leptotrichia_buccalis(0.5500)		0	0	0	0	0	0	1	0	0	0	0	0	0	0	0	0	0	0	0	0	0	0	0	0	0	0	0	0	0	1	0	0	0	0	0	0	44	0	0	0	0	0	0
287	MH815531	p:Bacteroidetes	f:Rikenellaceae(0.9600)	g:Alistipes(0.9600)	s:Alistipes_finegoldii(0.5500)		0	0	0	0	0	0	30	0	0	0	0	0	0	0	0	0	0	0	0	0	0	0	0	0	0	0	0	0	0	0	0	0	0	0	0	0	0	0	0	0	0	0	0
288	MH815532	p:Firmicutes	f:Leuconostocaceae(1.0000)	g:Leuconostoc(1.0000)	s:Leuconostoc_carnosum(1.0000)		0	0	0	0	0	0	5	0	0	0	0	34	2	4	0	0	0	0	0	0	0	0	0	0	0	0	0	0	0	0	0	1	2	0	0	0	0	0	0	0	0	0	0
290	MH815533	p:Bacteroidetes	f:Flavobacteriaceae(1.0000)	g:Chryseobacterium(0.9000)	s:Chryseobacterium_taichungense(0.5900)		0	0	0	0	0	0	0	0	0	0	0	0	0	3	0	0	0	0	0	0	0	0	0	0	0	0	0	0	0	0	0	0	0	0	0	0	0	0	0	0	0	0	0
291	MH815534	p:Proteobacteria	f:Sphingomonadaceae(1.0000)	g:Sphingobium(1.0000)	s:Sphingobium_chungbukense(0.8900)		0	9	21	0	0	0	0	0	1	29	0	0	0	0	0	0	0	0	0	0	0	0	0	0	0	0	0	0	0	0	0	0	0	0	0	0	0	0	0	0	0	0	0
292	MH815535	p:Proteobacteria	f:Phyllobacteriaceae(0.9700)	g:Aquamicrobium(0.5800)	s:Aquamicrobium_defluvii(0.4500)		2	27	100	0	36	6	0	3	2	0	10	89	14	2	0	117	121	13	0	0	1	0	0	0	0	0	0	0	0	0	0	0	0	0	0	0	0	0	0	0	0	0	0
293	MH815536	p:Chlamydiae	f:Parachlamydiaceae(0.2700)	g:Neochlamydia(0.1700)	s:Neochlamydia_hartmannellae(0.1700)		0	0	0	0	0	0	0	0	0	0	0	0	4	0	0	91	0	0	0	0	0	0	0	0	0	0	0	0	0	0	0	0	0	0	0	0	0	0	0	0	0	0	0
294	MH815537	p:Actinobacteria	f:Intrasporangiaceae(1.0000)	g:Janibacter(0.5300)	s:Humibacillus_xanthopallidus(0.3400)		0	0	0	0	0	10	6	0	2	0	0	87	7	2	6	0	0	0	0	0	0	0	0	0	0	0	0	0	0	0	0	0	0	0	0	0	0	0	0	0	0	0	0
295	MH815538	p:Proteobacteria	f:Alcaligenaceae(1.0000)	g:Achromobacter(1.0000)	s:Achromobacter_aegrifaciens(1.0000)		0	9	30	0	17	20	9	4	4	18	10	62	0	0	3	0	59	2	0	1	0	0	0	0	0	0	0	0	0	5	0	0	0	0	0	0	0	0	1	0	0	0	0
296	MH815539	p:Proteobacteria	f:Methylococcaceae(0.9900)	g:Methylobacter(0.4600)	s:Methylobacter_tundripaludum(0.3500)		0	0	0	0	0	0	0	0	0	0	0	0	0	0	0	0	0	0	0	0	0	0	0	0	0	0	0	0	0	14	0	0	0	0	0	0	0	0	1	0	0	0	0
298	MH815540	p:Proteobacteria	f:Desulfovibrionaceae(0.7000)	g:Desulfovibrio(0.5400)	s:Desulfonatronovibrio_magnus(0.1700)		0	0	0	0	0	0	27	0	0	0	0	0	0	0	0	0	0	0	0	0	0	0	0	0	0	0	0	0	0	0	0	0	0	0	0	0	0	0	0	0	0	0	0
299	MH815541	p:Proteobacteria	f:Unclassified_Thiotrichales(1.0000)	g:Caedibacter(1.0000)	s:Caedibacter_caryophilus(1.0000)		0	0	0	0	0	0	0	0	0	0	0	0	0	0	0	56	0	0	0	0	0	0	0	0	0	0	0	0	0	0	0	0	0	0	0	0	0	0	0	0	0	0	0
300	MH815542	p:Bacteroidetes	f:Flavobacteriaceae(0.3200)	g:Robertkochia(0.1500)	s:Robertkochia_marina(0.1500)		0	0	0	0	0	0	20	0	0	0	0	0	0	0	0	0	0	0	0	0	0	0	0	0	0	0	0	0	0	0	0	0	0	0	0	0	0	0	0	0	0	0	0
301	MH815543	p:Proteobacteria	f:Rhodanobacteraceae(0.9900)	g:Dyella(0.5900)	s:Dyella_ginsengisoli(0.2400)		0	1	0	0	0	0	20	0	0	0	0	0	0	0	0	0	0	0	0	0	0	0	0	0	0	0	0	0	0	0	0	0	0	0	0	0	0	0	0	0	0	0	0
302	MH815544	p:Bacteroidetes	f:Flavobacteriaceae(1.0000)	g:Elizabethkingia(1.0000)	s:Elizabethkingia_meningoseptica(0.9300)		0	0	0	0	0	0	33	0	0	0	0	0	0	0	0	0	0	0	0	0	0	0	0	0	0	0	0	0	0	0	0	0	0	0	0	0	0	0	0	0	0	0	0
303	MH815545	p:Firmicutes	f:Clostridiaceae(0.9600)	g:Clostridium(0.9600)	s:Clostridium_cocleatum(0.5300)		0	0	0	0	0	0	0	0	0	0	0	0	0	0	0	0	0	0	0	0	0	0	0	0	0	0	0	0	0	0	0	0	0	0	0	0	0	0	0	0	0	0	0
304	MH815546	p:Actinobacteria	f:Corynebacteriaceae(1.0000)	g:Turicella(1.0000)	s:Turicella_otitidis(1.0000)		0	0	0	0	0	0	0	0	0	0	0	0	0	0	0	0	0	0	0	0	0	0	0	0	0	0	0	0	0	0	0	0	0	0	0	0	0	0	0	0	0	0	0
305	MH815547	p:Firmicutes	f:Veillonellaceae(1.0000)	g:Selenomonas(0.5800)	s:Selenomonas_bovis(0.5300)		0	0	0	0	0	0	0	0	0	0	0	0	0	0	0	96	0	0	0	0	0	1	0	0	0	0	0	0	0	0	0	0	0	0	0	0	0	0	0	0	0	0	0
306	MH815548	p:Proteobacteria	f:Sphingomonadaceae(1.0000)	g:Sphingopyxis(1.0000)	s:Sphingopyxis_alaskensis(1.0000)		0	22	71	0	0	0	1	0	9	0	0	0	0	0	0	0	21	0	0	0	0	0	0	0	0	0	0	0	0	0	0	0	0	0	0	0	0	0	0	0	0	0	0
307	MH815549	p:Proteobacteria	f:Bradyrhizobiaceae(1.0000)	g:Bosea(1.0000)	s:Bosea_minatitlanensis(0.7400)		0	28	71	0	10	0	3	3	4	0	0	52	5	1	0	0	30	0	0	0	0	0	0	0	1	0	0	0	0	0	0	0	0	0	0	0	0	0	0	0	0	0	0
308	MH815550	p:Actinobacteria	f:Iamiaceae(0.9500)	g:Aquihabitans(0.9500)	s:Aquihabitans_daechungensis(0.9500)		0	0	0	0	0	0	0	0	0	0	0	0	0	0	0	58	0	0	0	0	0	0	0	0	0	0	0	0	0	0	0	0	0	0	0	0	22	0	0	0	0	0	0
309	MH815551	p:Proteobacteria	f:Pasteurellaceae(1.0000)	g:Aggregatibacter(0.9900)	s:Aggregatibacter_aphrophilus(0.9900)		0	1	0	0	0	0	2	0	0	0	0	0	0	0	0	0	35	0	0	0	0	0	0	0	0	0	0	0	0	0	0	0	0	0	0	0	40	0	0	0	0	0	0
310	MH815552	p:Deinococcus-Thermus	f:Deinococcaceae(1.0000)	g:Deinococcus(1.0000)	s:Deinococcus_radiotolerans(0.4500)		0	1	0	0	0	0	0	0	0	0	0	0	9	0	0	0	4	0	0	0	0	0	2	0	0	0	0	0	0	0	0	0	0	0	0	0	0	0	0	0	0	0	0
311	MH815553	p:Bacteroidetes	f:Rikenellaceae(0.7800)	g:Alistipes(0.7300)	s:Alistipes_finegoldii(0.4100)		0	0	0	0	0	4	22	0	0	0	0	0	0	0	0	0	0	0	0	0	0	0	0	0	0	0	0	0	0	0	0	0	0	0	0	0	0	0	0	0	0	0	0
312	MH815554	p:Proteobacteria	f:Nevskiaceae(0.3700)	g:Algiphilus(0.2600)	s:Algiphilus_aromaticivorans(0.2600)		0	11	25	0	0	0	0	0	4	47	0	0	0	0	0	0	36	4	0	0	1	0	0	0	0	0	0	0	0	0	0	0	0	0	0	0	0	0	0	0	0	0	0
313	MH815555	p:Actinobacteria	f:Corynebacteriaceae(1.0000)	g:Corynebacterium(1.0000)	s:Corynebacterium_glucuronolyticum(1.0000)		0	0	0	0	0	0	0	0	0	0	0	0	0	0	0	70	0	0	0	1	0	0	0	0	0	0	0	0	0	0	0	0	0	0	0	0	0	0	0	0	0	0	0
314	MH815556	p:Firmicutes	f:Ruminococcaceae(0.6100)	g:Anaerotruncus(0.2800)	s:Anaerotruncus_colihominis(0.2800)		0	0	0	0	0	12	42	0	0	0	0	0	0	0	0	0	0	0	0	0	0	0	0	0	0	0	0	0	0	0	0	0	0	0	0	0	0	0	0	0	0	0	0
315	MH815557	p:Cyanobacteria	f:Oscillatoriales(0.6700)	g:Crinalium(0.3000)	s:Crinalium_epipsammum(0.3000)		0	0	0	0	0	0	0	0	0	0	0	0	0	0	0	75	0	0	0	0	0	0	0	0	0	0	0	0	0	0	0	0	0	0	0	0	0	0	0	0	0	0	0
316	MH815558	p:Firmicutes	f:Veillonellaceae(1.0000)	g:Selenomonas(0.7400)	s:Selenomonas_noxia(0.7400)		0	0	0	0	31	0	0	0	0	0	15	0	0	0	0	0	0	2	0	0	0	0	0	0	0	0	0	0	0	0	0	0	0	0	0	0	41	0	0	0	0	0	0
317	MH815559	p:Bacteroidetes	f:Unclassified_Cytophagales(0.7400)	g:Chryseolinea(0.7300)	s:Chryseolinea_serpens(0.7300)		0	3	7	0	0	0	0	0	0	0	0	0	0	0	0	0	0	0	0	0	1	0	0	0	0	0	0	0	0	0	0	0	0	0	0	0	0	0	0	0	0	0	0
318	MH815560	p:Actinobacteria	f:Microbacteriaceae(0.2700)	g:Agromyces(0.2300)	s:Agromyces_rhizospherae(0.1100)		0	0	0	0	0	0	0	0	5	0	15	0	0	0	5	0	36	0	0	0	0	0	0	0	1	0	0	0	0	3	0	0	0	0	0	0	0	0	0	0	0	0	0
319	MH815561	p:Firmicutes	f:Unclassified_Clostridiales(1.0000)	g:Anaerococcus(1.0000)	s:Anaerococcus_murdochii(0.3500)		0	0	0	0	0	0	0	0	0	0	0	0	0	0	0	0	0	0	0	0	0	0	0	0	0	0	0	0	0	2	0	2	0	0	0	0	0	0	0	0	0	0	0
320	MH815562	p:Firmicutes	f:Clostridiaceae(0.5500)	g:Anaerosporobacter(0.4800)	s:Anaerosporobacter_mobilis(0.4800)		0	0	0	0	0	0	11	0	0	0	0	0	0	0	0	0	0	0	0	0	0	0	0	0	0	0	0	0	0	0	0	0	0	0	0	0	0	0	0	0	0	0	0
321	MH815563	p:Proteobacteria	f:Sphingomonadaceae(1.0000)	g:Sphingomonas(1.0000)	s:Sphingomonas_oligoaromativorans(1.0000)		0	0	0	0	17	0	0	0	0	0	0	36	0	0	0	0	0	0	0	0	0	0	0	0	0	0	0	0	0	0	0	0	0	0	0	0	0	0	0	0	0	0	0
322	MH815564	p:Actinobacteria	f:Acidothermaceae(0.3700)	g:Acidothermus(0.3700)	s:Acidothermus_cellulolyticus(0.3700)		0	0	4	0	0	9	0	0	0	0	0	0	0	0	0	0	0	0	0	0	0	0	0	0	0	0	0	0	0	0	0	0	0	0	0	0	0	0	0	0	0	0	0
323	MH815565	p:Bacteroidetes	f:Bacteroidaceae(0.8600)	g:Bacteroides(0.8600)	s:Bacteroides_acidifaciens(0.4000)		0	0	0	0	0	0	21	0	0	0	0	0	0	0	0	0	0	0	0	0	0	0	0	0	0	0	0	0	0	0	0	0	0	0	0	0	0	0	0	0	0	0	0
324	MH815566	p:Bacteroidetes	f:Cryomorphaceae(0.9100)	g:Brumimicrobium(0.2500)	s:Brumimicrobium_mesophilum(0.1700)		0	0	0	0	0	0	0	0	0	0	0	0	0	0	0	78	0	5	0	0	0	0	0	0	0	0	0	0	0	0	0	0	0	0	0	0	0	0	0	0	0	0	0
325	MH815567	p:Firmicutes	f:Planococcaceae(0.8200)	g:Sporosarcina(0.8200)	s:Sporosarcina_pasteurii(0.8200)		0	0	0	0	0	0	0	0	0	0	0	0	0	0	0	88	0	0	0	0	0	0	0	0	0	0	0	0	0	0	0	0	0	0	0	0	0	0	0	0	0	0	0
326	MH815568	p:Proteobacteria	f:Pseudomonadaceae(1.0000)	g:Pseudomonas(0.9600)	s:Pseudomonas_argentinensis(0.8200)		24	561	1990	0	1041	326	48	40	107	1626	672	1202	159	89	125	2012	1855	204	13	10	93	5	10	0	5	7	3	1	0	2	0	1	14	0	0	2	90	0	1	0	0	0	7
327	MH815569	p:Firmicutes	f:Peptoniphilaceae(1.0000)	g:Peptoniphilus(1.0000)	s:Peptoniphilus_coxii(1.0000)		0	0	0	0	0	0	1	0	0	0	0	0	0	0	0	0	0	0	0	0	0	0	0	0	0	0	1	0	0	0	0	0	0	0	0	0	0	0	0	0	0	0	0
328	MH815570	p:Proteobacteria	f:Erythrobacteraceae(1.0000)	g:Altererythrobacter(0.8000)	s:Altererythrobacter_xinjiangensis(0.3200)		0	0	1	0	0	0	0	0	0	34	0	0	0	0	0	0	36	6	0	0	0	0	0	0	0	0	0	0	0	0	0	0	0	0	0	0	0	0	0	0	0	0	0
329	MH815571	p:Bacteroidetes	f:Bacteroidaceae(0.2100)	g:Acetomicrobium(0.2100)	s:Acetomicrobium_faecale(0.2100)		0	0	3	0	0	0	0	0	0	0	0	0	0	0	0	0	5	0	0	0	0	0	0	0	0	0	0	0	0	0	0	0	0	0	0	0	0	0	0	0	0	0	0
330	MH815572	p:Proteobacteria	f:Phyllobacteriaceae(0.4300)	g:Mesorhizobium(0.4300)	s:Defluviimonas_denitrificans(0.3600)		0	3	3	0	0	1	1	0	0	0	0	0	0	3	2	51	31	0	0	0	0	0	0	0	0	0	0	0	0	0	0	0	0	0	0	0	0	0	0	0	0	0	0
331	MH815573	p:Proteobacteria	f:Sphingomonadaceae(1.0000)	g:Sphingosinicella(0.9900)	s:Sphingosinicella_microcystinivorans(0.8900)		0	3	15	0	0	0	0	0	4	0	0	37	0	0	0	38	25	3	0	0	0	0	0	0	0	0	0	0	0	0	0	0	0	0	0	0	0	0	0	0	0	0	0
332	MH815574	p:Proteobacteria	f:Rhodanobacteraceae(1.0000)	g:Dokdonella(1.0000)	s:Dokdonella_soli(0.4900)		0	0	4	0	0	0	33	0	2	0	0	0	0	0	0	0	0	0	0	0	0	0	0	0	1	0	0	0	0	0	0	0	0	0	0	0	0	0	0	0	0	0	0
333	MH815575	p:Bacteroidetes	f:Chitinophagaceae(1.0000)	g:Terrimonas(0.4700)	s:Terrimonas_lutea(0.4600)		0	0	1	0	0	15	0	1	1	0	0	40	14	6	11	38	53	12	0	0	0	0	0	0	0	0	0	0	0	0	0	0	0	0	0	0	0	0	0	0	0	0	0
334	MH815576	p:Bacteroidetes	f:Cytophagaceae(1.0000)	g:Hymenobacter(1.0000)	s:Hymenobacter_ginsengisoli(0.8600)		0	0	0	0	0	0	0	0	0	0	27	0	0	0	0	0	0	0	0	0	0	0	0	0	0	0	0	0	0	0	0	0	0	0	0	0	0	0	0	0	0	0	0
335	MH815577	p:Verrucomicrobia	f:Verrucomicrobiaceae(0.5600)	g:Haloferula(0.1900)	s:Roseimicrobium_gellanilyticum(0.1800)		0	0	0	0	0	0	0	0	0	0	0	0	0	0	0	0	0	0	0	0	0	0	0	0	0	0	0	0	0	2	0	0	0	0	0	0	0	0	1	0	0	0	0
336	MH815578	p:Firmicutes	f:Clostridiaceae(0.2500)	g:Clostridium(0.2000)	s:Clostridium_putrefaciens(0.0900)		0	0	0	0	0	15	28	0	0	0	0	0	0	0	0	0	0	0	0	0	0	0	0	0	0	0	0	0	0	0	0	0	0	0	0	0	0	0	0	0	0	0	0
337	MH815579	p:Proteobacteria	f:Rhizobiaceae(0.9300)	g:Rhizobium(0.9200)	s:Rhizobium_subbaraonis(0.9000)		0	98	354	0	33	11	7	2	20	70	93	48	10	1	22	1	43	16	0	0	0	0	0	0	0	0	0	0	0	0	0	0	0	1	0	0	0	1	0	0	0	0	0
338	MH815580	p:Bacteroidetes	f:Rikenellaceae(0.9700)	g:Alistipes(0.9700)	s:Alistipes_indistinctus(0.6700)		0	0	0	0	0	0	18	0	0	0	0	0	0	0	0	0	0	0	1	0	0	0	0	0	0	0	0	0	0	0	0	0	0	0	0	0	0	0	0	0	0	0	0
339	MH815581	p:Proteobacteria	f:Methylobacteriaceae(1.0000)	g:Methylobacterium(1.0000)	s:Methylobacterium_aminovorans(1.0000)		0	0	1	0	31	0	0	0	0	0	14	36	0	0	0	0	13	0	0	0	0	0	0	0	0	0	0	0	0	0	0	0	0	0	0	0	0	0	0	0	0	0	0
340	MH815582	p:Bacteroidetes	f:Chitinophagaceae(1.0000)	g:Parasegetibacter(0.3200)	s:Parasegetibacter_terrae(0.2800)		0	3	4	0	8	0	0	1	5	0	0	0	27	0	0	0	0	6	1	0	0	0	0	0	0	0	0	0	0	0	0	0	0	0	0	0	0	0	0	0	0	0	0
342	MH815583	p:Firmicutes	f:Clostridiaceae(0.5100)	g:Clostridium(0.3500)	s:Clostridium_phytofermentans(0.2000)		0	0	0	0	0	12	17	0	0	0	0	0	0	0	0	0	0	0	0	0	0	0	0	0	0	0	0	0	0	0	0	0	0	0	0	0	0	0	0	0	0	1	0
343	MH815584	p:Bacteroidetes	f:Prevotellaceae(1.0000)	g:Prevotella(1.0000)	s:Prevotella_salivae(0.9900)		0	0	0	0	23	0	3	0	0	0	0	66	0	0	0	0	0	0	0	0	0	0	0	0	0	0	0	0	0	0	0	0	0	0	0	0	0	0	0	0	0	0	0
344	MH815585	p:Bacteroidetes	f:Chitinophagaceae(0.9400)	g:Chitinophaga(0.4000)	s:Niabella_aurantiaca(0.3300)		0	0	2	0	0	0	0	0	6	0	0	0	0	0	0	0	0	0	0	0	0	0	0	0	0	0	0	0	0	0	0	0	0	0	0	0	0	0	0	0	0	0	0
345	MH815586	p:Proteobacteria	f:Rhizobiaceae(0.1600)	g:Roseiarcus(0.1000)	s:Roseiarcus_fermentans(0.1000)		0	23	54	0	0	0	0	0	1	0	0	0	5	0	0	0	0	0	0	0	0	0	0	0	0	0	0	0	0	0	0	0	0	0	0	0	0	0	0	0	0	0	0
346	MH815587	p:Proteobacteria	f:Hyphomicrobiaceae(1.0000)	g:Hyphomicrobium(0.9400)	s:Hyphomicrobium_facile_subsp._facile(0.5800)		0	0	11	0	2	0	0	0	0	1	17	42	0	2	0	52	12	2	0	0	0	0	0	0	1	0	0	0	0	0	0	0	0	0	0	0	0	0	0	0	0	0	0
347	MH815588	p:Proteobacteria	f:Rhodobacteraceae(1.0000)	g:Gemmobacter(0.6300)	s:Gemmobacter_nectariphilus(0.4300)		0	0	12	0	4	2	1	0	4	34	24	0	0	2	6	0	14	6	0	0	0	0	0	1	0	0	0	0	0	8	0	0	0	0	0	0	0	0	0	0	0	0	0
348	MH815589	p:Proteobacteria	f:Burkholderiaceae(0.4300)	g:Burkholderia(0.3100)	s:Azoarcus_indigens(0.1800)		0	0	0	0	0	0	0	0	0	18	11	0	0	2	0	0	36	5	2	2	0	0	0	0	0	0	0	0	0	3	0	0	0	0	0	0	0	0	0	0	0	0	0
349	MH815590	p:Proteobacteria	f:Desulfovibrionaceae(0.1600)	g:Desulfovibrio(0.1400)	s:Bradymonas_sediminis(0.1000)		0	0	0	0	0	0	0	0	0	0	0	80	0	0	0	0	0	0	0	0	0	0	0	0	0	0	0	0	0	0	0	0	0	0	0	0	0	0	0	0	0	0	0
350	MH815591	p:Actinobacteria	f:Micrococcaceae(1.0000)	g:Kocuria(0.9300)	s:Kocuria_rhizophila(0.7600)		0	0	0	0	41	8	9	0	0	34	15	0	17	0	7	75	0	21	0	0	0	0	0	0	0	0	0	0	0	6	0	0	3	0	0	0	0	0	0	0	0	0	0
351	MH815592	p:Firmicutes	f:Lachnospiraceae(0.6300)	g:Hespellia(0.6100)	s:Hespellia_porcina(0.4500)		0	0	0	0	0	0	30	0	0	0	0	0	0	0	0	0	0	0	0	0	0	0	0	0	0	0	0	0	0	0	0	0	0	0	0	0	0	0	0	0	0	0	0
352	MH815593	p:Proteobacteria	f:Comamonadaceae(0.5200)	g:Brachymonas(0.4500)	s:Brachymonas_chironomi(0.4500)		1	8	32	0	0	21	1	1	11	176	7	54	10	1	0	3	109	10	0	39	37	21	24	3	47	9	1	0	0	0	0	0	0	0	0	1	0	0	0	0	0	0	0
354	MH815594	p:Acidobacteria	f:Acidobacteriaceae(1.0000)	g:Acidobacterium(0.6000)	s:Acidobacterium_capsulatum(0.6000)		0	0	0	0	0	0	7	0	0	0	0	0	0	0	0	0	0	0	0	0	0	0	0	0	0	0	0	0	0	0	0	0	0	0	0	0	0	0	0	0	0	0	0
355	MH815595	p:Firmicutes	f:Aerococcaceae(1.0000)	g:Abiotrophia(1.0000)	s:Abiotrophia_defectiva(1.0000)		0	0	0	0	0	0	0	0	4	0	0	0	10	0	0	0	0	0	0	0	0	0	0	0	0	0	0	0	0	0	0	0	0	0	0	4	24	0	0	0	0	0	0
356	MH815596	p:Bacteroidetes	f:Cytophagaceae(1.0000)	g:Larkinella(1.0000)	s:Larkinella_bovis(0.8200)		3	0	0	0	0	0	0	0	0	0	12	0	0	5	0	0	12	0	0	0	0	0	0	0	0	0	0	0	0	0	0	0	0	0	0	0	0	0	0	0	0	0	0
357	MH815597	p:Bacteroidetes	f:Cytophagaceae(1.0000)	g:Dyadobacter(1.0000)	s:Dyadobacter_sediminis(0.5500)		0	4	6	0	0	7	1	0	0	75	0	0	0	0	0	0	15	2	0	0	0	0	0	0	0	0	0	0	0	0	0	0	0	0	0	0	0	0	0	0	0	0	0
358	MH815598	p:Firmicutes	f:Peptostreptococcaceae(1.0000)	g:Peptostreptococcus(1.0000)	s:Peptostreptococcus_stomatis(0.9600)		0	0	0	0	0	0	0	0	0	0	0	74	0	0	0	0	0	0	0	0	0	0	0	0	0	0	0	0	0	0	0	0	0	0	0	0	0	0	0	0	0	0	0
359	MH815599	p:Proteobacteria	f:Rhizobiaceae(1.0000)	g:Kaistia(1.0000)	s:Kaistia_geumhonensis(1.0000)		0	6	44	0	0	0	0	0	1	0	0	0	7	0	0	0	0	7	0	0	0	0	0	0	1	0	0	0	0	0	0	0	0	0	0	0	20	0	0	0	0	0	0
361	MH815600	p:Proteobacteria	f:Alcaligenaceae(0.7800)	g:Kerstersia(0.4700)	s:Kerstersia_gyiorum(0.4700)		0	0	0	0	0	0	26	0	0	0	0	0	0	0	0	0	0	0	0	0	0	0	0	0	0	0	0	0	0	0	0	0	0	0	0	0	0	0	0	0	0	0	0
362	MH815601	p:Firmicutes	f:Ruminococcaceae(0.8100)	g:Ethanoligenens(0.2600)	s:Ethanoligenens_harbinense(0.2600)		0	0	0	0	0	0	18	0	0	0	0	0	0	0	0	0	0	0	0	0	0	0	0	0	0	0	0	0	0	0	0	0	0	0	0	0	0	0	0	0	0	0	0
363	MH815602	p:Firmicutes	f:Clostridiaceae(0.6100)	g:Clostridium(0.5900)	s:Clostridium_colinum(0.4000)		0	0	0	0	0	0	15	0	0	0	0	0	0	0	0	0	0	0	0	0	0	0	0	0	0	0	0	0	0	0	0	0	0	0	0	0	0	0	0	0	0	0	0
364	MH815603	p:Proteobacteria	f:Pseudomonadaceae(1.0000)	g:Pseudomonas(0.9900)	s:Pseudomonas_xanthomarina(0.9300)		0	14	17	0	23	0	1	0	0	0	0	0	0	0	0	0	0	0	0	0	0	0	0	0	0	0	0	0	0	0	0	0	0	0	0	0	0	0	0	0	0	0	0
365	MH815604	p:Proteobacteria	f:Nevskiaceae(1.0000)	g:Alkanibacter(0.6600)	s:Alkanibacter_difficilis(0.6600)		0	0	0	0	0	0	0	0	0	40	0	0	0	0	0	0	38	0	0	0	0	0	0	0	0	0	0	0	0	0	0	0	0	0	0	0	0	0	0	0	0	0	0
366	MH815605	p:Proteobacteria	f:Desulfovibrionaceae(0.9600)	g:Bilophila(0.5200)	s:Bilophila_wadsworthia(0.5200)		0	0	0	0	0	0	8	0	0	0	0	0	0	0	0	0	0	0	0	0	0	0	0	0	0	0	0	0	0	0	0	0	0	0	0	0	0	0	0	0	0	0	0
367	MH815606	p:Proteobacteria	f:Nevskiaceae(1.0000)	g:Fontimonas(0.8500)	s:Fontimonas_thermophila(0.8500)		0	0	0	0	0	0	0	0	0	0	0	0	1	0	0	49	0	0	0	0	0	0	0	0	0	0	0	0	0	0	0	0	0	0	0	0	0	0	0	0	0	0	0
368	MH815607	p:Proteobacteria	f:Phyllobacteriaceae(0.8900)	g:Mesorhizobium(0.8900)	s:Mesorhizobium_abyssinicae(0.8900)		1	0	12	0	0	6	0	0	0	0	9	105	0	5	0	6	34	2	0	0	3	0	0	0	3	0	0	0	0	0	0	0	0	0	0	0	0	0	0	0	0	0	0
369	MH815608	p:Bacteroidetes	f:Chitinophagaceae(0.4100)	g:Solitalea(0.1800)	s:Solitalea_koreensis(0.1800)		0	0	0	0	0	0	0	0	0	2	0	0	0	8	0	30	17	10	0	0	0	0	0	0	0	0	0	0	0	0	0	0	0	0	0	0	0	0	0	0	0	0	0
370	MH815609	p:Bacteroidetes	f:Chitinophagaceae(0.3300)	g:Bacteroides(0.2000)	s:Bacteroides_acidifaciens(0.1200)		0	0	0	0	0	0	2	0	0	0	17	87	0	0	0	0	0	5	0	0	0	0	0	0	0	0	0	0	0	6	0	0	0	0	0	0	0	0	0	0	0	0	0
372	MH815610	p:Firmicutes	f:Ruminococcaceae(0.9200)	g:Anaerofilum(0.5000)	s:Anaerofilum_agile(0.5000)		0	0	0	0	0	0	32	0	0	0	0	0	0	0	0	0	0	0	0	0	0	0	0	0	0	0	0	0	0	0	0	0	0	0	0	0	0	0	0	0	0	0	0
374	MH815611	p:Proteobacteria	f:Desulfovibrionaceae(0.9200)	g:Bilophila(0.7400)	s:Bilophila_wadsworthia(0.7400)		0	0	0	0	0	0	14	0	0	0	0	0	0	0	0	0	0	0	0	0	0	0	0	0	0	0	0	0	0	0	0	0	0	0	0	0	0	0	0	0	0	0	0
375	MH815612	p:Bacteroidetes	f:Chitinophagaceae(1.0000)	g:Taibaiella(1.0000)	s:Taibaiella_koreensis(0.8100)		0	3	10	0	0	27	0	2	2	19	0	0	15	7	5	0	54	0	0	0	1	0	0	0	0	0	0	0	0	0	0	0	0	0	0	0	0	0	0	0	0	0	0
376	MH815613	p:Verrucomicrobia	f:Verrucomicrobiaceae(1.0000)	g:Haloferula(0.8700)	s:Haloferula_luteola(0.4900)		0	17	35	0	1	0	0	3	13	11	10	0	0	0	0	0	22	12	0	0	1	0	0	0	0	0	0	0	0	0	0	0	0	0	0	0	0	0	0	0	0	0	0
377	MH815614	p:Proteobacteria	f:Rhodospirillaceae(0.7100)	g:Caenispirillum(0.2500)	s:Caenispirillum_bisanense(0.2500)		0	0	0	0	0	0	10	0	0	0	0	0	0	0	0	0	0	0	0	0	0	0	0	0	0	0	0	0	0	0	0	0	0	0	0	0	0	0	0	0	0	0	0
378	MH815615	p:Proteobacteria	f:Hyphomicrobiaceae(1.0000)	g:Devosia(1.0000)	s:Devosia_crocina(0.8500)		0	7	24	0	26	15	1	0	8	69	31	33	14	0	0	0	54	0	0	0	0	0	1	0	0	0	0	0	0	0	0	0	0	0	0	0	0	0	0	0	0	0	0
379	MH815616	p:Firmicutes	f:Thermoanaerobacteraceae(0.2000)	g:Carboxydocella(0.1100)	s:Carboxydocella_manganica(0.1100)		0	0	0	0	0	0	0	0	0	0	0	0	0	0	0	0	0	0	0	0	0	0	0	0	0	0	0	0	0	3	0	0	0	0	0	0	0	0	0	0	0	0	0
380	MH815617	p:Bacteroidetes	f:Saprospiraceae(0.9600)	g:Haliscomenobacter(0.5600)	s:Haliscomenobacter_hydrossis(0.5600)		0	0	0	0	12	0	0	0	0	0	0	0	0	3	0	0	0	0	0	0	0	0	0	0	0	0	0	0	0	0	0	0	0	0	0	0	0	0	0	0	0	0	0
382	MH815618	p:Proteobacteria	f:Hyphomicrobiaceae(1.0000)	g:Hyphomicrobium(1.0000)	s:Hyphomicrobium_denitrificans(1.0000)		0	2	19	0	0	0	0	3	0	0	0	0	0	0	0	0	19	0	0	0	0	0	0	0	0	0	0	0	0	0	0	0	0	0	0	0	0	0	0	0	0	0	0
383	MH815619	p:Proteobacteria	f:Thioalkalispiraceae(0.4400)	g:Thioprofundum(0.4300)	s:Thioprofundum_hispidum(0.3000)		0	0	2	0	0	10	0	0	0	0	0	0	0	3	4	0	34	0	0	0	0	0	0	0	0	0	0	0	0	0	0	0	0	0	0	0	0	0	0	0	0	0	0
384	MH815620	p:Bacteroidetes	f:Chitinophagaceae(1.0000)	g:Asinibacterium(0.3900)	s:Asinibacterium_lactis(0.3900)		0	0	4	0	0	0	0	0	5	24	2	58	9	0	0	49	69	0	0	0	0	0	0	0	1	0	0	0	0	0	0	0	0	0	0	0	0	0	0	0	0	0	0
385	MH815621	p:Bacteroidetes	f:Prevotellaceae(1.0000)	g:Prevotella(1.0000)	s:Prevotella_copri(1.0000)		0	0	0	0	22	0	0	0	0	45	0	0	0	0	0	0	0	0	0	0	0	0	0	0	0	0	0	0	0	0	0	0	0	0	0	0	0	0	0	0	0	0	0
386	MH815622	p:Bacteroidetes	f:Flavobacteriaceae(1.0000)	g:Flavobacterium(1.0000)	s:Flavobacterium_aquaticum(0.8400)		0	3	17	0	0	0	2	0	0	0	0	0	0	0	0	28	0	0	0	0	0	0	0	0	0	0	0	0	0	0	0	0	0	0	0	0	0	0	0	0	0	0	0
387	MH815623	p:Proteobacteria	f:Legionellaceae(0.7400)	g:Legionella(0.7400)	s:Legionella_anisa(0.3000)		0	0	0	0	0	0	0	0	0	0	0	74	0	0	0	0	0	0	0	0	0	0	0	0	0	0	0	0	0	0	0	0	0	0	0	0	0	0	0	0	0	0	0
388	MH815624	p:Proteobacteria	f:Hyphomicrobiaceae(0.9400)	g:Filomicrobium(0.8300)	s:Filomicrobium_fusiforme(0.7600)		0	0	1	0	0	9	0	0	16	81	10	27	0	4	15	0	27	0	0	0	0	0	0	0	0	0	0	0	0	0	0	0	0	0	0	0	0	0	0	0	0	0	0
389	MH815625	p:Verrucomicrobia	f:Opitutaceae(1.0000)	g:Opitutus(1.0000)	s:Opitutus_terrae(1.0000)		0	0	0	0	0	0	0	0	5	0	0	0	0	0	0	0	5	0	0	0	0	0	0	0	0	0	0	0	0	0	0	0	0	0	0	0	0	0	0	0	0	0	0
390	MH815626	p:Proteobacteria	f:Haliangiaceae(0.3900)	g:Haliangium(0.3900)	s:Haliangium_ochraceum(0.3900)		0	0	0	0	0	0	0	0	0	0	0	78	0	0	0	0	0	0	0	0	0	0	0	0	0	0	0	0	0	0	0	0	0	0	0	0	0	0	0	0	0	0	0
391	MH815627	p:Firmicutes	f:Clostridiaceae(1.0000)	g:Clostridium(0.7500)	s:Hungatella_effluvii(0.2500)		0	0	0	0	0	0	15	0	0	0	0	0	0	0	0	0	0	0	0	0	0	0	0	0	0	0	0	0	0	0	0	0	0	0	0	0	0	0	0	0	0	0	0
392	MH815628	p:Proteobacteria	f:Rhodospirillaceae(0.8100)	g:Nitrospirillum(0.1800)	s:Nitrospirillum_amazonense(0.1800)		0	0	0	0	0	0	0	0	0	76	0	0	0	0	0	0	0	0	0	0	0	0	0	0	0	0	0	0	0	0	0	0	0	0	0	0	0	0	0	0	0	0	0
393	MH815629	p:Actinobacteria	f:Micrococcaceae(1.0000)	g:Kocuria(1.0000)	s:Kocuria_kristinae(1.0000)		0	0	0	0	0	38	0	0	0	0	23	0	0	0	0	0	0	0	0	0	1	0	0	0	0	0	0	0	0	0	0	0	0	0	0	0	0	0	0	0	0	0	0
394	MH815630	p:Actinobacteria	f:Dermabacteraceae(1.0000)	g:Brachybacterium(1.0000)	s:Brachybacterium_muris(0.7600)		0	0	0	0	0	0	1	0	0	0	0	0	4	0	0	0	0	0	0	0	0	0	0	0	0	0	0	0	0	0	0	0	0	0	0	0	0	0	0	0	0	0	0
396	MH815631	p:Bacteroidetes	f:Chitinophagaceae(1.0000)	g:Taibaiella(0.2900)	s:Taibaiella_koreensis(0.2800)		0	0	0	0	33	0	2	0	4	0	0	0	0	3	0	0	13	0	0	0	0	0	0	0	0	0	0	0	0	0	0	0	0	0	0	0	0	0	0	0	0	0	0
397	MH815632	p:Firmicutes	f:Unclassified_Clostridiales(0.5600)	g:Tissierella(0.3000)	s:Tissierella_praeacuta(0.2100)		0	0	0	0	23	0	2	0	0	0	0	0	0	0	0	0	0	0	0	0	0	0	0	0	0	0	0	0	0	0	0	0	0	0	0	0	0	0	0	0	0	0	0
398	MH815633	p:Verrucomicrobia	f:Verrucomicrobiaceae(1.0000)	g:Prosthecobacter(0.9800)	s:Prosthecobacter_algae(0.9700)		0	0	0	0	0	0	0	0	9	29	0	0	0	3	0	0	0	0	0	0	0	0	0	0	0	0	0	0	0	0	0	0	0	0	0	0	0	0	0	0	0	0	0
399	MH815634	p:Firmicutes	f:Unclassified_Clostridiales(0.6300)	g:Blautia(0.6300)	s:Blautia_schinkii(0.3300)		0	0	0	0	0	0	6	0	0	0	0	0	0	0	0	0	0	0	0	0	0	0	0	0	0	0	0	0	0	0	0	0	0	0	0	0	0	0	0	0	0	0	0
400	MH815635	p:Proteobacteria	f:Xanthobacteraceae(0.9300)	g:Pseudolabrys(0.9300)	s:Pseudolabrys_taiwanensis(0.9300)		0	0	1	0	0	4	0	0	0	46	0	0	3	0	5	47	35	0	0	0	0	0	0	0	0	0	0	0	0	0	0	0	0	0	0	0	0	0	0	0	0	0	0
401	MH815636	p:Fusobacteria	f:Leptotrichiaceae(1.0000)	g:Leptotrichia(1.0000)	s:Leptotrichia_hongkongensis(0.4300)		0	0	0	0	0	0	0	0	0	0	11	0	0	0	0	114	0	0	0	0	0	0	0	0	0	0	0	0	0	14	0	0	0	0	0	0	0	0	0	0	0	0	0
402	MH815637	p:Actinobacteria	f:Dermacoccaceae(1.0000)	g:Dermacoccus(0.5900)	s:Dermacoccus_abyssi(0.5900)		0	0	0	0	0	0	1	0	0	0	0	0	0	0	0	0	0	0	0	0	0	0	0	0	3	0	0	0	0	13	0	0	0	0	0	0	0	0	0	0	0	0	0
403	MH815638	p:Firmicutes	f:Erysipelotrichaceae(1.0000)	g:Solobacterium(0.9600)	s:Solobacterium_moorei(0.9600)		0	0	0	0	0	0	0	0	0	53	0	0	0	0	5	0	0	0	0	0	0	0	0	0	0	0	0	0	0	0	0	0	3	0	0	0	0	0	0	0	0	0	0
407	MH815639	p:Bacteroidetes	f:Prevotellaceae(1.0000)	g:Prevotella(1.0000)	s:Prevotella_baroniae(1.0000)		0	0	0	0	0	47	0	0	0	0	0	0	0	0	0	0	0	0	0	0	0	0	0	0	0	0	0	0	0	0	0	0	0	0	0	0	0	0	0	0	0	0	0
408	MH815640	p:Proteobacteria	f:Rhodospirillaceae(1.0000)	g:Azospirillum(1.0000)	s:Azospirillum_melinis(0.5700)		0	0	0	0	0	0	1	0	0	4	0	0	6	0	0	0	0	0	0	1	2	0	0	0	0	0	0	0	0	0	0	0	0	0	0	0	0	0	0	0	0	0	0
409	MH815641	p:Firmicutes	f:Clostridiaceae(0.5500)	g:Clostridium(0.3300)	s:Clostridium_asparagiforme(0.1700)		0	0	0	0	0	0	44	0	0	0	0	0	0	0	0	0	0	0	0	0	0	0	0	0	0	0	0	0	0	0	0	0	0	0	0	0	0	0	0	0	0	0	0
410	MH815642	p:Bacteroidetes	f:Cytophagaceae(1.0000)	g:Emticicia(1.0000)	s:Emticicia_ginsengisoli(1.0000)		0	2	7	0	0	5	2	0	0	0	0	0	0	0	0	40	34	0	0	0	1	0	0	0	0	0	0	0	0	0	0	0	0	0	0	0	0	0	0	0	0	0	0
412	MH815643	p:Bacteroidetes	f:Chitinophagaceae(1.0000)	g:Ferruginibacter(0.6100)	s:Ferruginibacter_alkalilentus(0.5600)		0	6	5	0	20	0	0	0	2	21	0	35	1	0	0	0	27	0	0	0	0	0	0	0	0	0	0	0	0	0	0	0	0	0	0	0	0	0	0	0	0	0	0
413	MH815644	p:Firmicutes	f:Clostridiaceae(0.8400)	g:Clostridium(0.8300)	s:Clostridium_polysaccharolyticum(0.6200)		0	0	0	0	0	0	11	0	0	0	0	0	0	0	0	0	0	0	0	0	0	0	0	0	0	0	0	0	0	0	0	0	0	0	0	0	0	0	0	0	0	1	0
415	MH815645	p:Proteobacteria	f:Geminicoccaceae	g:Geminicoccus(0.5500)	s:Geminicoccus_roseus(0.5500)		0	0	0	0	54	0	0	0	0	0	0	0	0	0	0	0	0	0	0	0	0	0	0	0	0	0	0	0	0	0	0	0	0	0	0	0	0	0	0	0	0	0	0
416	MH815646	p:Proteobacteria	f:Myxococcaceae(0.3900)	g:Aggregicoccus(0.3900)	s:Aggregicoccus_edonensis(0.3900)		0	0	0	0	0	0	0	0	0	0	0	0	0	0	0	74	0	0	0	0	0	0	0	0	0	0	0	0	0	0	0	0	0	0	0	0	0	0	0	0	0	0	0
417	MH815647	p:Bacteroidetes	f:Chitinophagaceae(0.9200)	g:Hydrotalea(0.3400)	s:Asinibacterium_lactis(0.2700)		0	0	0	0	0	0	11	0	0	0	0	0	0	0	0	0	0	0	0	0	0	0	0	0	0	0	0	0	0	0	0	0	0	0	0	0	0	0	0	0	0	0	0
418	MH815648	p:Bacteroidetes	f:Flavobacteriaceae(1.0000)	g:Capnocytophaga(1.0000)	s:Capnocytophaga_leadbetteri(1.0000)		0	0	0	0	29	17	0	0	0	61	13	0	0	0	0	0	0	0	0	0	0	0	0	0	1	0	0	0	0	0	0	3	0	0	0	0	0	0	0	0	0	0	0
419	MH815649	p:Bacteroidetes	f:Cytophagaceae(0.9700)	g:Adhaeribacter(0.6900)	s:Adhaeribacter_aerophilus(0.3400)		0	0	0	0	0	0	0	0	3	0	0	64	0	0	0	0	0	0	0	0	0	0	0	0	0	0	0	0	0	0	0	0	0	0	0	0	0	0	0	0	0	0	0
420	MH815650	p:Bacteroidetes	f:Flavobacteriaceae(1.0000)	g:Flavobacterium(0.5900)	s:Flavobacterium_ahnfeltiae(0.1900)		0	0	0	0	0	0	0	0	0	0	0	0	2	0	0	0	0	0	1	0	0	0	0	0	0	0	0	0	0	0	0	0	0	0	0	0	0	0	0	0	0	0	0
421	MH815651	p:Firmicutes	f:Streptococcaceae(1.0000)	g:Streptococcus(1.0000)	s:Streptococcus_anginosus(1.0000)		0	0	0	0	0	0	0	0	0	0	0	0	13	0	21	1	0	0	0	0	0	0	0	0	0	0	0	0	0	0	0	0	0	0	0	0	0	0	0	0	0	0	0
422	MH815652	p:Verrucomicrobia	f:Verrucomicrobiaceae(1.0000)	g:Luteolibacter(1.0000)	s:Luteolibacter_yonseiensis(0.3700)		0	0	1	0	0	5	0	1	0	0	0	0	0	0	2	48	0	1	0	0	1	0	0	0	0	0	0	0	0	0	0	0	0	0	0	0	0	0	0	0	0	0	0
423	MH815653	p:Bacteroidetes	f:Chitinophagaceae(0.9700)	g:Taibaiella(0.4200)	s:Sediminibacterium_ginsengisoli(0.3500)		0	8	59	0	0	6	0	0	0	0	23	40	0	0	0	0	0	0	0	0	0	0	0	0	0	0	0	0	0	0	0	0	0	0	0	0	0	0	0	0	0	0	0
424	MH815654	p:Firmicutes	f:Listeriaceae(0.6100)	g:Listeria(0.6100)	s:Listeria_grayi(0.5100)		0	0	0	0	0	0	11	0	0	0	0	0	0	0	0	0	0	0	0	0	0	0	0	0	0	0	0	0	0	0	0	0	0	0	0	0	0	0	0	0	0	0	0
425	MH815655	p:Bacteroidetes	f:Bacteroidaceae(1.0000)	g:Bacteroides(1.0000)	s:Bacteroides_dorei(1.0000)		0	0	0	0	0	0	5	0	0	0	0	0	0	0	0	0	0	0	0	0	0	0	0	0	0	0	0	0	0	0	0	0	0	0	0	0	0	0	0	0	0	0	0
426	MH815656	p:Bacteroidetes	f:Cytophagaceae(1.0000)	g:Spirosoma(1.0000)	s:Spirosoma_oryzae(0.6700)		0	0	0	0	0	0	0	0	0	70	0	0	0	0	0	0	0	0	0	0	0	0	0	0	0	0	0	0	0	0	0	0	0	0	0	0	0	0	0	0	0	0	0
427	MH815657	p:Actinobacteria	f:Corynebacteriaceae(1.0000)	g:Corynebacterium(1.0000)	s:Corynebacterium_durum(1.0000)		0	0	0	1	0	0	4	0	0	0	13	0	17	0	0	0	0	0	0	0	0	0	0	0	0	0	0	0	0	0	0	0	0	0	0	0	0	0	0	0	0	0	0
428	MH815658	p:Bacteroidetes	f:Chitinophagaceae(1.0000)	g:Hydrotalea(0.4000)	s:Hydrotalea_flava(0.4000)		0	0	0	0	0	0	19	0	0	0	0	0	0	0	0	0	0	0	0	0	0	0	0	0	0	0	0	0	0	0	0	0	0	0	0	0	0	0	0	0	0	0	0
429	MH815659	p:Bacteroidetes	f:Porphyromonadaceae(0.8100)	g:Dysgonomonas(0.7600)	s:Dysgonomonas_macrotermitis(0.6600)		0	0	0	0	0	0	8	0	0	0	0	0	0	0	0	0	0	0	0	0	0	0	0	0	0	0	0	0	0	0	0	0	0	0	0	0	0	0	0	0	0	0	0
430	MH815660	p:Proteobacteria	f:Legionellaceae(1.0000)	g:Legionella(1.0000)	s:Legionella_lytica(0.8100)		0	0	3	0	0	0	0	0	0	0	0	0	0	1	0	0	0	0	0	0	0	0	0	0	0	0	0	0	0	0	0	0	0	0	0	0	0	0	0	0	0	0	0
431	MH815661	p:Proteobacteria	f:Polyangiaceae(0.7200)	g:Chondromyces(0.5000)	s:Chondromyces_crocatus(0.2900)		0	0	0	0	6	0	0	0	0	0	0	0	0	0	0	45	31	0	0	0	0	0	0	0	0	0	0	0	0	0	0	0	0	0	0	0	0	0	0	0	0	0	0
432	MH815662	p:Proteobacteria	f:Myxococcaceae(0.8700)	g:Aggregicoccus(0.8700)	s:Aggregicoccus_edonensis(0.8700)		0	0	0	0	0	0	0	0	0	0	0	0	0	0	0	0	12	0	0	0	0	0	0	0	0	0	0	0	0	0	0	0	0	0	0	0	0	0	1	0	0	0	0
433	MH815663	p:Verrucomicrobia	f:Unclassified_Spartobacteria(0.3700)	g:Limisphaera(0.3700)	s:Limisphaera_ngatamarikiensis(0.3700)		0	0	0	0	2	5	0	1	5	39	0	0	0	0	0	0	0	0	0	0	0	0	0	0	0	0	0	0	0	0	0	0	0	0	0	0	0	0	0	0	0	0	0
434	MH815664	p:Actinobacteria	f:Pseudonocardiaceae(1.0000)	g:Saccharopolyspora(0.7400)	s:Saccharopolyspora_lacisalsi(0.3600)		0	0	0	0	0	0	3	0	2	0	0	79	0	0	0	0	0	0	0	0	0	0	0	0	0	0	0	0	0	0	0	0	0	0	0	0	0	0	0	0	0	0	0
435	MH815665	p:Proteobacteria	f:Legionellaceae(0.4100)	g:Legionella(0.4100)	s:Legionella_brunensis(0.1800)		0	0	0	0	0	0	0	0	0	0	0	0	0	0	0	52	0	0	0	0	0	0	0	0	0	0	0	0	0	0	0	0	0	0	0	0	0	0	0	0	0	0	0
440	MH815666	p:Proteobacteria	f:Desulfobacteraceae(0.1200)	g:Desulfonema(0.0400)	s:Mucispirillum_schaedleri(0.0400)		0	0	0	0	0	0	0	0	0	0	0	63	0	0	0	0	0	0	0	0	0	0	0	0	0	0	0	0	0	0	0	0	0	0	0	0	0	0	0	0	0	0	0
441	MH815667	p:Bacteroidetes	f:Prevotellaceae(1.0000)	g:Prevotella(1.0000)	s:Prevotella_denticola(1.0000)		0	0	0	0	0	0	0	0	7	0	0	0	0	0	0	0	0	0	0	0	0	0	0	0	0	0	0	0	0	14	0	2	0	0	0	0	0	0	0	0	0	0	0
442	MH815668	p:Proteobacteria	f:Moraxellaceae(1.0000)	g:Acinetobacter(1.0000)	s:Acinetobacter_beijerinckii(0.9900)		0	0	0	0	15	123	15	5	41	137	123	212	26	18	0	482	504	5	12	217	219	84	125	12	232	20	0	0	0	3	11	225	92	24	0	0	0	0	0	1	6	9	14
443	MH815669	p:Firmicutes	f:Unclassified_Clostridiales(0.4500)	g:Blautia(0.4500)	s:Blautia_coccoides(0.3000)		0	0	0	0	0	0	7	0	0	0	0	0	0	0	0	0	0	0	0	0	0	0	0	0	0	0	0	0	0	0	0	0	0	0	0	0	0	0	0	0	0	0	0
444	MH815670	p:Firmicutes	f:Unclassified_Clostridiales(0.1600)	g:Anaerococcus(0.1000)	s:Anaerococcus_murdochii(0.0500)		17	0	0	0	0	0	34	0	0	0	0	0	0	0	0	0	0	0	0	0	0	0	0	0	0	0	0	0	0	0	0	0	0	0	0	0	0	0	0	0	0	0	0
445	MH815671	p:Verrucomicrobia	f:Verrucomicrobiaceae(1.0000)	g:Luteolibacter(0.9700)	s:Luteolibacter_luojiensis(0.7800)		0	0	0	0	38	0	0	0	0	0	1	34	0	0	0	0	0	6	0	0	0	0	0	0	0	0	0	0	0	3	0	0	0	0	0	0	0	0	0	0	0	0	0
446	MH815672	p:Proteobacteria	f:Desulfobacteraceae(0.1600)	g:Desulfomicrobium(0.1000)	s:Desulfomicrobium_escambiense(0.0600)		0	0	1	0	0	0	0	0	0	61	17	64	0	0	0	0	28	8	0	0	0	0	0	0	0	0	0	0	0	0	0	0	0	0	0	0	0	0	0	0	0	0	0
447	MH815673	p:Planctomycetes	f:Planctomycetaceae(0.9800)	g:Blastopirellula(0.8500)	s:Blastopirellula_cremea(0.7500)		0	0	0	0	14	0	0	0	0	0	0	0	0	0	0	0	0	0	0	0	0	0	0	0	0	0	0	0	0	0	0	0	0	0	0	0	0	0	0	0	0	0	0
449	MH815674	p:Proteobacteria	f:Sphingomonadaceae(0.9500)	g:Sphingobium(0.5200)	s:Sphingobium_boeckii(0.2700)		0	0	0	0	0	0	0	0	0	0	0	56	0	0	0	0	0	0	0	0	0	0	0	0	0	0	0	0	0	0	0	0	0	0	0	0	0	0	0	0	0	0	0
450	MH815675	p:Proteobacteria	f:Methylococcaceae(0.9900)	g:Methylobacter(0.7200)	s:Methylobacter_tundripaludum(0.6600)		0	0	0	0	0	0	0	0	0	0	0	0	0	0	0	0	0	0	0	0	0	0	0	0	0	0	0	0	0	1	0	0	0	0	0	0	0	0	0	2	0	0	0
451	MH815676	p:Proteobacteria	f:Hydrogenophilaceae(1.0000)	g:Thiobacillus(1.0000)	s:Thiobacillus_thioparus(0.8000)		0	0	0	0	0	0	12	0	0	0	0	0	0	0	0	0	0	0	0	0	0	0	0	0	0	0	0	0	0	0	0	0	0	0	0	0	0	0	0	0	0	0	0
453	MH815677	p:Proteobacteria	f:Xanthobacteraceae(0.9800)	g:Xanthobacter(0.9500)	s:Xanthobacter_viscosus(0.5600)		0	1	8	0	0	1	0	0	0	0	0	0	0	0	0	0	11	0	0	0	0	0	0	0	0	0	0	0	0	0	0	0	0	0	0	0	0	0	0	0	0	0	0
454	MH815678	p:Bacteroidetes	f:Prevotellaceae(1.0000)	g:Prevotella(1.0000)	s:Prevotella_timonensis(1.0000)		0	0	0	0	0	0	3	0	0	0	0	0	0	0	0	0	0	12	0	0	0	0	0	0	0	0	0	0	0	0	0	0	0	0	0	0	0	0	0	0	0	0	0
455	MH815679	p:Proteobacteria	f:Hyphomicrobiaceae(0.3700)	g:Blastochloris(0.3600)	s:Blastochloris_sulfoviridis(0.2700)		0	0	0	0	0	0	0	0	0	50	0	0	0	0	0	0	17	0	0	0	0	0	0	0	0	0	0	0	0	0	0	0	0	0	0	0	0	0	0	0	0	0	0
456	MH815680	p:Bacteroidetes	f:Chitinophagaceae(1.0000)	g:Ferruginibacter(0.6300)	s:Ferruginibacter_lapsinanis(0.5400)		0	0	1	0	0	0	0	0	0	0	0	90	0	0	0	0	54	11	0	0	0	0	0	0	0	0	0	0	0	0	0	0	0	0	0	0	0	0	0	0	0	0	0
457	MH815681	p:Actinobacteria	f:Acidothermaceae(0.3700)	g:Acidothermus(0.3700)	s:Acidothermus_cellulolyticus(0.3700)		0	0	0	0	0	0	0	0	0	13	0	36	0	0	0	0	0	0	0	0	0	0	0	0	0	0	0	0	0	0	0	0	0	0	0	0	0	0	0	0	0	0	0
458	MH815682	p:Proteobacteria	f:Aurantimonadaceae(0.5300)	g:Aureimonas(0.3800)	s:Aureimonas_altamirensis(0.3800)		0	0	0	0	0	4	0	0	0	0	0	0	0	0	3	47	0	0	0	0	0	0	0	0	0	0	0	0	0	0	0	0	0	0	0	0	0	0	0	0	0	0	0
459	MH815683	p:Planctomycetes	f:Planctomycetaceae(0.9700)	g:Rubinisphaera(0.4300)	s:Rubinisphaera_brasiliensis(0.4300)		0	0	0	0	0	5	0	0	0	0	0	0	0	0	0	0	37	0	0	0	0	0	0	0	2	0	0	0	0	0	0	0	0	0	0	0	0	0	0	0	0	0	0
460	MH815684	p:Proteobacteria	f:Rhodospirillaceae(0.3900)	g:Sphingomonas(0.1800)	s:Rhodovibrio_sodomensis(0.1300)		0	1	10	0	0	0	0	0	0	0	0	43	0	0	3	0	16	5	0	0	0	0	0	0	0	0	0	0	0	0	0	0	0	0	0	0	0	0	0	0	0	0	0
461	MH815685	p:Firmicutes	f:Bacillaceae(0.8000)	g:Bacillus(0.2000)	s:Aquibacillus_albus(0.1200)		0	0	0	0	0	0	0	0	0	0	0	0	0	0	0	43	0	0	0	0	0	0	0	0	0	0	0	0	0	0	0	0	0	0	0	0	0	0	0	0	0	0	0
464	MH815686	p:Bacteroidetes	f:Chitinophagaceae(1.0000)	g:Taibaiella(1.0000)	s:Taibaiella_koreensis(0.5100)		0	0	0	0	0	0	17	0	0	0	0	0	0	0	0	0	0	0	0	0	0	0	0	0	0	0	0	0	0	0	0	0	0	0	0	0	0	0	0	0	0	0	0
465	MH815687	p:Verrucomicrobia	f:Puniceicoccaceae(0.7100)	g:Cerasicoccus(0.3800)	s:Cerasicoccus_arenae(0.3800)		0	0	0	0	0	0	0	0	0	0	0	0	0	1	0	0	0	0	0	0	0	0	0	0	0	0	0	0	0	12	0	0	0	0	0	0	0	0	0	0	0	0	0
466	MH815688	p:Chloroflexi	f:Caldilineaceae(1.0000)	g:Caldilinea(0.7400)	s:Caldilinea_aerophila(0.7400)		0	0	0	0	21	0	0	0	0	0	0	0	0	0	0	0	0	3	0	0	0	0	0	0	0	0	0	0	0	0	0	0	0	0	0	0	0	0	0	0	0	0	0
467	MH815689	p:Firmicutes	f:Clostridiaceae(0.7900)	g:Clostridium(0.7900)	s:Clostridium_methylpentosum(0.7900)		0	0	0	0	0	0	7	0	0	0	0	0	0	0	0	0	0	0	0	0	0	0	0	0	0	0	0	0	0	0	0	0	0	0	0	0	0	0	0	0	0	0	0
468	MH815690	p:Bacteroidetes	f:Rikenellaceae(0.8800)	g:Rikenella(0.7100)	s:Rikenella_microfusus(0.7100)		0	0	0	0	0	0	6	0	0	0	0	0	0	0	0	0	0	0	0	0	0	0	0	0	0	0	0	0	0	0	0	0	0	0	0	0	0	0	0	0	0	0	0
469	MH815691	p:Actinobacteria	f:Acidomicrobiaceae(0.4900)	g:Aciditerrimonas(0.4900)	s:Aciditerrimonas_ferrireducens(0.4900)		0	1	5	0	15	0	0	0	0	0	0	0	0	0	0	0	0	0	0	0	0	0	0	0	0	0	0	0	0	0	0	0	0	0	0	0	0	0	0	0	0	0	0
470	MH815692	p:Proteobacteria	f:Lysobacteraceae(1.0000)	g:Luteimonas(0.9200)	s:Luteimonas_mephitis(0.4000)		0	1	23	0	0	0	0	0	0	32	0	0	0	3	0	0	11	2	0	0	0	0	0	0	0	0	0	0	0	0	0	0	0	0	0	0	0	0	0	0	0	0	0
471	MH815693	p:Firmicutes	f:Clostridiaceae(0.1300)	g:Caloramator(0.0800)	s:Caloramator_proteoclasticus(0.0600)		0	1	7	0	0	0	2	0	0	0	0	0	0	0	4	46	0	0	0	0	0	0	0	0	0	0	0	0	0	0	0	0	0	0	0	0	0	0	0	0	0	0	0
472	MH815694	p:Proteobacteria	f:Sphingomonadaceae(1.0000)	g:Sphingomonas(0.8000)	s:Sphingomonas_laterariae(0.3700)		0	0	0	0	0	0	2	0	0	0	0	0	0	0	0	0	0	0	0	0	0	0	0	0	0	0	0	0	0	0	0	0	0	0	0	0	0	0	0	0	0	0	0
473	MH815695	p:Firmicutes	f:Clostridiaceae(1.0000)	g:Mobilitalea(0.8700)	s:Mobilitalea_sibirica(0.8700)		0	0	0	0	0	3	0	0	0	0	0	0	0	0	0	0	0	0	0	0	0	0	0	0	0	0	0	0	0	0	0	0	0	1	0	0	0	0	0	0	0	0	0
474	MH815696	p:Firmicutes	f:Clostridiaceae(0.8900)	g:Clostridium(0.8900)	s:Clostridium_cocleatum(0.3300)		0	0	0	0	0	6	17	0	0	0	0	0	0	0	0	0	0	0	0	0	0	0	0	0	0	0	0	0	0	0	0	0	0	0	0	0	0	0	0	0	0	0	0
475	MH815697	p:Proteobacteria	f:Campylobacteraceae(1.0000)	g:Arcobacter(1.0000)	s:Arcobacter_suis(0.8700)		0	0	0	0	0	0	0	0	0	0	0	0	7	0	0	0	0	0	0	0	0	0	0	0	0	0	0	0	0	2	0	0	0	0	0	0	0	0	0	0	0	0	0
476	MH815698	p:Proteobacteria	f:Sphingomonadaceae(0.2200)	g:Sphingorhabdus(0.0700)	s:Sphingorhabdus_rigui(0.0700)		0	0	0	0	0	3	1	0	0	0	0	39	0	0	0	0	0	1	0	0	0	0	0	0	0	0	0	0	0	0	0	0	0	0	0	0	0	0	0	0	0	0	0
477	MH815699	p:Chlamydiae	f:Parachlamydiaceae(0.9900)	g:Parachlamydia(0.8100)	s:Parachlamydia_acanthamoebae(0.8100)		0	0	2	0	0	0	0	0	0	0	0	33	5	0	0	0	0	1	0	0	0	0	0	0	0	0	0	0	0	0	0	0	0	0	0	0	0	0	0	0	0	0	0
478	MH815700	p:Proteobacteria	f:Rhodocyclaceae(1.0000)	g:Zoogloea(0.9900)	s:Zoogloea_oryzae(0.8900)		0	2	12	0	6	6	0	2	0	20	0	0	10	4	4	13	19	0	0	0	0	0	2	0	0	0	0	0	0	0	0	0	0	3	0	0	0	0	0	0	0	0	0
479	MH815701	p:Firmicutes	f:Peptococcaceae(0.2700)	g:Gracilibacter(0.1400)	s:Gracilibacter_thermotolerans(0.1400)		0	0	0	0	0	0	16	0	0	0	0	0	0	0	0	0	0	0	0	0	0	0	0	0	0	0	0	0	0	0	0	0	0	0	0	0	0	0	0	0	0	0	0
481	MH815702	p:Verrucomicrobia	f:Unclassified_Spartobacteria(0.7200)	g:Limisphaera(0.6800)	s:Limisphaera_ngatamarikiensis(0.6800)		0	0	0	0	0	0	0	0	0	10	0	0	0	0	0	0	0	0	0	0	0	0	0	0	0	0	0	0	0	0	0	0	0	0	0	0	0	0	0	0	0	0	0
482	MH815703	p:Proteobacteria	f:Moraxellaceae(1.0000)	g:Alkanindiges(0.9300)	s:Alkanindiges_illinoisensis(0.9300)		0	0	0	0	0	0	5	0	0	0	0	0	0	0	0	0	0	0	0	0	0	0	0	0	0	0	0	0	0	0	0	0	0	0	0	0	0	0	0	0	0	0	0
483	MH815704	p:Bacteroidetes	f:Chitinophagaceae(1.0000)	g:Ferruginibacter(0.9800)	s:Ferruginibacter_yonginensis(0.9800)		0	0	0	0	0	0	0	0	0	50	0	0	0	0	0	0	0	0	0	0	0	0	0	0	0	0	0	0	0	0	0	0	0	0	0	0	0	0	0	0	0	0	0
484	MH815705	p:Firmicutes	f:Clostridiaceae(0.6600)	g:Clostridium(0.6600)	s:Clostridium_colinum(0.6200)		0	0	0	0	0	0	10	0	0	0	0	0	0	0	0	0	0	0	0	0	0	0	0	0	0	0	0	0	0	0	0	0	0	0	0	0	0	0	0	0	0	0	0
485	MH815706	p:Firmicutes	f:Acholeplasmataceae(0.0700)	g:Acholeplasma(0.0700)	s:Anaeroplasma_bactoclasticum(0.0400)		0	5	13	0	0	0	0	0	0	0	0	0	0	0	0	40	0	0	0	0	0	0	0	0	0	0	0	0	0	3	0	0	0	0	0	0	0	0	0	0	0	0	0
486	MH815707	p:Proteobacteria	f:Rhodanobacteraceae(0.9600)	g:Dokdonella(0.9600)	s:Dokdonella_fugitiva(0.9100)		0	0	1	0	0	0	0	0	3	0	0	53	0	0	0	0	0	0	0	0	0	0	0	0	0	0	0	0	0	0	0	0	0	0	0	0	0	0	0	0	0	0	0
487	MH815708	p:Proteobacteria	f:Caulobacteraceae(1.0000)	g:Phenylobacterium(1.0000)	s:Phenylobacterium_koreense(0.9800)		0	4	31	0	0	0	7	0	0	0	0	38	0	0	0	0	0	1	0	0	0	0	0	0	0	0	0	0	0	0	0	0	0	0	0	0	0	0	0	0	0	0	0
488	MH815709	p:Proteobacteria	f:Rhodospirillaceae(0.9600)	g:Dongia(0.8200)	s:Dongia_mobilis(0.8200)		0	0	0	0	0	0	0	0	0	0	19	0	0	0	6	51	0	2	0	0	0	0	0	0	0	0	0	0	0	0	0	0	0	0	0	0	0	0	0	0	0	0	0
490	MH815710	p:Firmicutes	f:Ruminococcaceae(0.5900)	g:Acetanaerobacterium(0.3500)	s:Acetanaerobacterium_elongatum(0.3500)		0	0	0	0	0	0	6	0	0	0	0	0	0	0	0	0	0	0	0	0	0	0	0	0	0	0	0	0	0	0	0	0	0	0	0	0	0	0	0	0	0	0	0
491	MH815711	p:Proteobacteria	f:Xanthobacteraceae(0.6800)	g:Pseudolabrys(0.6700)	s:Pseudolabrys_taiwanensis(0.6700)		0	1	5	0	0	0	0	0	0	12	0	0	0	0	0	78	49	0	0	0	1	0	0	0	0	0	0	0	0	0	0	0	0	0	0	0	0	0	0	0	0	0	0
492	MH815712	p:Bacteroidetes	f:Flavobacteriaceae(1.0000)	g:Flavobacterium(1.0000)	s:Flavobacterium_ummariense(0.8100)		0	10	25	0	0	0	0	0	0	0	0	0	0	0	0	0	20	0	1	0	0	0	0	0	0	0	0	0	0	0	0	0	0	0	0	0	12	0	0	0	0	0	0
493	MH815713	p:Firmicutes	f:Staphylococcaceae(1.0000)	g:Jeotgalicoccus(1.0000)	s:Jeotgalicoccus_psychrophilus(0.6500)		0	0	0	0	0	0	8	0	0	0	0	0	0	0	0	0	0	0	0	0	0	0	0	0	0	0	0	0	0	0	0	0	0	0	0	0	0	0	0	0	0	0	0
494	MH815714	p:Verrucomicrobia	f:Opitutaceae(0.9600)	g:Opitutus(0.9400)	s:Opitutus_terrae(0.9400)		0	0	0	0	0	0	0	0	0	0	0	0	0	0	0	50	0	0	0	0	0	0	0	0	0	0	0	0	0	0	0	0	0	0	0	0	0	0	0	0	0	0	0
495	MH815715	p:Armatimonadetes	f:Fimbriimonadaceae(0.8900)	g:Fimbriimonas(0.8900)	s:Fimbriimonas_ginsengisoli(0.8900)		0	2	12	0	0	0	0	0	6	0	10	18	0	0	0	0	0	0	0	0	0	0	0	0	2	0	0	0	0	0	0	0	0	0	0	0	0	0	0	0	0	0	0
496	MH815716	p:Firmicutes	f:Unclassified_Bacillales(0.9800)	g:Exiguobacterium(0.9800)	s:Exiguobacterium_antarcticum(0.9000)		0	0	2	0	7	0	11	0	0	0	0	0	0	0	0	0	0	0	0	5	2	0	1	0	1	0	0	0	0	0	0	0	0	0	0	0	0	0	0	0	0	0	0
497	MH815717	p:Bacteroidetes	f:Porphyromonadaceae(0.1100)	g:Porphyromonas(0.1100)	s:Porphyromonas_crevioricanis(0.0500)		0	0	0	0	0	0	0	0	5	33	0	0	0	0	0	0	14	0	0	0	0	0	0	0	0	0	0	0	0	0	0	0	0	0	0	0	0	0	0	0	0	0	0
499	MH815718	p:Bacteroidetes	f:Unclassified_Cytophagales(0.9300)	g:Chryseolinea(0.9000)	s:Chryseolinea_serpens(0.9000)		0	0	0	0	0	0	0	0	0	42	0	46	0	0	0	24	50	3	0	0	0	0	0	0	0	0	0	0	0	0	0	0	0	0	0	0	0	0	0	0	0	0	0
500	MH815719	p:Actinobacteria	f:Thermomonosporaceae(0.8900)	g:Actinomadura(0.6200)	s:Actinomadura_alba(0.5100)		0	0	0	0	0	0	12	0	0	0	0	0	0	0	0	0	0	0	0	0	0	0	0	0	0	0	0	0	0	0	0	0	0	0	0	0	0	0	0	0	0	0	0
501	MH815720	p:Proteobacteria	f:Polyangiaceae(0.6900)	g:Chondromyces(0.5200)	s:Chondromyces_apiculatus(0.2600)		0	0	0	0	0	4	0	0	0	0	0	0	0	0	0	49	0	0	0	0	0	0	0	0	0	0	0	0	0	0	0	0	0	0	0	0	0	0	0	0	0	0	0
504	MH815721	p:Proteobacteria	f:Sphingomonadaceae(1.0000)	g:Sphingomonas(1.0000)	s:Sphingomonas_jaspsi(0.7000)		0	0	0	0	0	0	0	0	3	0	0	0	0	0	0	0	0	11	0	0	0	0	0	0	0	0	0	0	0	0	0	0	0	0	0	0	0	0	0	0	0	0	0
505	MH815722	p:Planctomycetes	f:Planctomycetaceae(0.9700)	g:Zavarzinella(0.4600)	s:Zavarzinella_formosa(0.4600)		0	0	0	0	0	3	0	0	0	0	0	0	0	3	0	0	8	4	0	0	0	0	0	0	0	0	0	0	0	0	0	0	0	0	0	0	0	0	0	0	0	0	0
506	MH815723	p:Verrucomicrobia	f:Unclassified_Spartobacteria(0.8100)	g:Limisphaera(0.8100)	s:Limisphaera_ngatamarikiensis(0.8100)		0	0	0	0	0	0	0	0	0	37	0	0	0	0	0	0	0	0	0	0	0	0	0	0	0	0	0	0	0	0	0	0	0	0	0	0	0	0	0	0	0	0	0
507	MH815724	p:Verrucomicrobia	f:Verrucomicrobiaceae(1.0000)	g:Prosthecobacter(1.0000)	s:Prosthecobacter_fluviatilis(0.9000)		0	4	28	0	0	0	1	0	0	0	0	0	0	0	0	51	26	7	0	0	2	0	0	0	0	0	0	0	0	0	0	0	0	0	0	0	0	0	0	0	0	0	0
508	MH815725	p:Planctomycetes	f:Planctomycetaceae(0.9900)	g:Aquisphaera(0.8800)	s:Aquisphaera_giovannonii(0.8800)		0	0	8	0	0	0	0	0	0	0	23	0	0	0	0	0	0	0	0	0	0	0	0	0	0	0	0	0	0	0	0	0	0	0	0	0	0	0	0	0	0	0	0
509	MH815726	p:Bacteroidetes	f:Chitinophagaceae(0.1100)	g:Chitinophaga(0.1000)	s:Chitinophaga_taiwanensis(0.1000)		0	4	37	0	0	0	0	0	0	0	0	0	0	0	0	0	0	0	0	0	0	0	0	0	0	0	0	0	0	0	0	0	0	0	0	0	0	0	0	0	0	0	0
510	MH815727	p:Proteobacteria	f:Campylobacteraceae(1.0000)	g:Campylobacter(1.0000)	s:Campylobacter_rectus(0.9600)		0	0	0	0	0	3	0	0	0	0	0	0	0	0	0	0	0	2	0	0	0	0	0	0	0	0	0	0	0	0	0	0	4	0	0	0	0	0	0	0	0	0	0
511	MH815728	p:Proteobacteria	f:Coxiellaceae(1.0000)	g:Aquicella(1.0000)	s:Aquicella_siphonis(1.0000)		0	0	0	0	0	0	0	0	0	0	0	0	0	0	0	41	0	0	0	0	0	0	0	0	0	0	0	0	0	0	0	0	0	0	0	0	0	0	0	0	0	0	0
514	MH815729	p:Actinobacteria	f:Streptomycetaceae(0.3800)	g:Streptomyces(0.3800)	s:Jatrophihabitans_endophyticus(0.2800)		0	0	2	0	0	0	0	0	0	0	0	39	0	0	0	0	11	0	0	0	0	0	0	0	0	0	0	0	0	0	0	0	0	0	0	0	0	0	0	0	0	0	0
515	MH815730	p:Firmicutes	f:Clostridiaceae(0.5400)	g:Clostridium(0.3500)	s:Eubacterium_eligens(0.1800)		0	0	0	0	0	0	0	0	0	47	0	0	0	0	0	0	0	0	0	0	0	0	0	0	0	0	0	0	0	0	0	0	0	0	0	0	0	0	0	0	0	0	0
516	MH815731	p:Bacteroidetes	f:Porphyromonadaceae(0.9500)	g:Parabacteroides(0.8600)	s:Parabacteroides_chinchillae(0.7000)		0	0	0	0	0	15	481	0	5	0	0	0	0	0	0	0	0	6	0	0	0	0	0	0	0	0	0	0	0	0	0	0	0	0	0	0	0	0	0	0	0	0	0
517	MH815732	p:Acidobacteria	f:Acidobacteriaceae(1.0000)	g:Telmatobacter(0.6800)	s:Telmatobacter_bradus(0.6800)		0	0	0	0	0	0	11	0	0	0	0	0	0	0	0	0	0	0	0	0	0	0	0	0	0	0	0	0	0	0	0	0	0	0	0	0	0	0	0	0	0	0	0
518	MH815733	p:Proteobacteria	f:Polyangiaceae(0.3800)	g:Jahnella(0.3300)	s:Jahnella_thaxteri(0.3300)		0	0	0	0	0	0	0	0	0	0	0	35	0	0	0	43	5	0	0	1	0	0	0	0	0	0	0	0	0	0	0	0	0	0	0	0	0	0	0	0	0	0	0
519	MH815734	p:Chloroflexi	f:Sphaerobacteraceae(0.4400)	g:Nitrolancea(0.3500)	s:Nitrolancea_hollandica(0.3500)		0	0	0	0	0	0	0	0	0	0	0	0	0	0	0	42	0	0	0	0	0	0	0	0	0	0	0	0	0	0	0	0	0	0	0	0	0	0	0	0	0	0	0
520	MH815735	p:Planctomycetes	f:Planctomycetaceae(0.9600)	g:Zavarzinella(0.3600)	s:Zavarzinella_formosa(0.3600)		0	0	0	0	0	0	0	0	0	0	0	0	0	0	0	35	0	0	0	0	0	0	0	0	0	0	0	0	0	0	0	0	0	0	0	0	0	0	0	0	0	0	0
522	MH815736	p:Firmicutes	f:Eubacteriaceae(0.9200)	g:Eubacterium(0.9100)	s:Eubacterium_coprostanoligenes(0.9100)		0	0	0	0	0	0	8	0	0	0	0	0	0	0	0	0	0	0	0	0	0	0	0	0	0	0	0	0	0	0	0	0	0	0	0	0	0	0	0	0	0	1	0
523	MH815737	p:Actinobacteria	f:Corynebacteriaceae(1.0000)	g:Corynebacterium(1.0000)	s:Corynebacterium_lipophiloflavum(0.8600)		0	0	0	0	0	0	1	0	0	0	32	0	0	0	0	0	0	0	0	0	0	0	0	1	0	0	0	0	0	0	0	0	0	0	0	0	0	0	0	0	0	0	0
524	MH815738	p:Bacteroidetes	f:Sphingobacteriaceae(1.0000)	g:Pedobacter(0.9900)	s:Pedobacter_composti(0.9900)		0	1	2	0	0	0	0	0	0	0	0	0	0	0	0	0	0	0	0	0	0	0	0	0	0	0	0	0	0	0	0	0	0	0	0	0	0	0	0	0	0	0	0
525	MH815739	p:Actinobacteria	f:Bifidobacteriaceae(0.1100)	g:Bifidobacterium(0.0800)	s:Bifidobacterium_animalis_subsp._lactis(0.0600)		0	0	0	0	0	0	0	0	0	0	0	0	0	0	0	43	0	0	0	0	0	0	0	0	0	0	0	0	0	0	0	0	0	0	0	0	0	0	0	0	0	0	0
526	MH815740	p:Planctomycetes	f:Planctomycetaceae(1.0000)	g:Thermogutta(0.5600)	s:Thermogutta_terrifontis(0.4500)		0	1	2	0	0	3	1	1	0	42	0	0	9	0	0	20	0	0	0	0	0	0	0	0	1	0	0	0	0	0	0	0	0	0	0	0	24	0	0	0	0	0	0
528	MH815741	p:Firmicutes	f:Ruminococcaceae(1.0000)	g:Faecalibacterium(1.0000)	s:Faecalibacterium_prausnitzii(1.0000)		0	0	0	0	0	6	9	0	0	0	0	0	0	0	0	0	0	0	0	0	0	0	0	0	0	0	0	0	0	0	0	0	0	0	0	0	20	0	0	0	0	0	0
529	MH815742	p:Chlamydiae	f:Parachlamydiaceae(1.0000)	g:Neochlamydia(0.9700)	s:Neochlamydia_hartmannellae(0.9700)		0	0	1	0	0	0	0	0	0	18	0	0	0	0	0	0	22	0	0	0	0	0	0	0	0	0	0	0	0	0	0	0	0	0	0	0	0	0	0	0	0	0	0
530	MH815743	p:Firmicutes	f:Unclassified_Clostridiales(0.0900)	g:Actinopolyspora(0.0900)	s:Leptolinea_tardivitalis(0.0500)		0	0	0	0	0	0	1	0	0	15	0	39	0	1	0	0	0	0	0	0	0	0	0	0	0	0	0	0	0	0	0	0	0	0	0	0	0	0	0	0	0	0	0
531	MH815744	p:Bacteroidetes	f:Flavobacteriaceae(1.0000)	g:Capnocytophaga(1.0000)	s:Capnocytophaga_gingivalis(0.8000)		0	0	0	0	0	0	0	0	0	0	0	45	0	0	0	0	0	0	0	0	0	0	0	0	0	0	0	0	0	0	0	0	0	0	0	0	0	0	0	0	0	0	0
532	MH815745	p:Proteobacteria	f:Brucellaceae(1.0000)	g:Brucella(1.0000)	s:Brucella_abortus(1.0000)		0	9	34	0	46	0	2	0	0	40	0	0	1	0	0	0	38	3	0	1	0	0	0	0	1	0	0	0	0	4	0	0	0	0	0	0	0	0	0	0	0	0	0
536	MH815746	p:Planctomycetes	f:Planctomycetaceae(1.0000)	g:Singulisphaera(0.9300)	s:Singulisphaera_acidiphila(0.5800)		0	1	4	0	0	0	0	0	0	0	0	0	0	0	0	29	0	0	0	0	0	0	0	0	0	0	0	0	0	0	0	0	0	0	0	0	0	0	0	0	0	0	0
537	MH815747	p:Proteobacteria	f:Rhodocyclaceae(0.6500)	g:Azonexus(0.6100)	s:Azonexus_caeni(0.5300)		0	0	0	0	0	0	0	0	0	0	0	0	0	0	0	54	0	0	0	0	0	0	0	0	0	0	0	0	0	0	0	0	0	0	0	0	0	0	0	0	0	0	0
538	MH815748	p:Firmicutes	f:Clostridiaceae(0.1400)	g:Cyclobacterium(0.0700)	s:Desulfonatronospira_thiodismutans(0.0500)		0	0	0	0	0	0	0	0	0	0	0	0	0	0	0	47	0	0	0	0	0	0	0	0	0	0	0	0	0	0	0	0	0	0	0	0	0	0	0	0	0	0	0
540	MH815749	p:Bacteroidetes	f:Saprospiraceae(1.0000)	g:Haliscomenobacter(1.0000)	s:Haliscomenobacter_hydrossis(1.0000)		0	0	0	0	0	0	0	0	0	0	0	0	0	0	6	0	6	0	0	0	0	0	0	0	0	0	0	0	0	0	0	0	0	0	0	0	0	0	0	0	0	0	0
541	MH815750	p:Planctomycetes	f:Planctomycetaceae(0.9600)	g:Planctopirus(0.3600)	s:Planctopirus_limnophila(0.3600)		0	0	0	0	0	0	0	0	0	0	38	0	0	0	0	0	0	0	0	0	0	0	0	0	0	0	0	0	0	0	0	0	0	0	0	0	0	0	0	0	0	0	0
542	MH815751	p:Proteobacteria	f:Caulobacteraceae(0.9700)	g:Asticcacaulis(0.9700)	s:Asticcacaulis_excentricus(0.8900)		0	0	0	0	0	0	0	0	2	0	0	0	5	0	0	0	0	0	0	0	0	0	0	0	0	0	0	0	0	0	0	0	0	0	0	0	0	0	0	0	0	0	0
545	MH815752	p:Firmicutes	f:Peptostreptococcaceae(0.9900)	g:Filifactor(0.9900)	s:Filifactor_villosus(0.9900)		0	0	0	0	36	0	2	0	0	0	0	0	0	0	0	0	0	0	0	0	0	0	0	0	0	0	0	0	0	0	0	0	0	0	0	0	0	0	0	0	0	0	0
547	MH815753	p:Bacteroidetes	f:Rikenellaceae(0.9000)	g:Alistipes(0.5300)	s:Alistipes_indistinctus(0.4300)		0	0	0	0	0	0	12	0	0	0	0	0	0	0	0	0	0	0	0	0	0	0	0	0	0	0	0	0	0	0	0	0	0	0	0	0	0	0	0	0	0	0	0
548	MH815754	p:Firmicutes	f:Veillonellaceae(1.0000)	g:Veillonella(1.0000)	s:Veillonella_montpellierensis(1.0000)		0	0	0	0	0	0	0	0	0	42	0	0	0	0	0	0	0	0	0	0	0	0	0	0	0	0	0	0	0	0	0	0	0	0	0	0	0	0	0	0	0	0	0
549	MH815755	p:Proteobacteria	f:Aeromonadaceae(1.0000)	g:Aeromonas(1.0000)	s:Aeromonas_aquariorum(1.0000)		9	157	643	0	490	65	7	5	16	297	79	164	37	13	25	117	174	18	9	3	3	1	1	0	2	1	1	1	0	0	0	3	0	0	0	0	14	0	0	0	0	0	0
550	MH815756	p:Firmicutes	f:Clostridiaceae(0.1200)	g:Legionella(0.1000)	s:Legionella_israelensis(0.0800)		0	0	0	0	0	0	0	0	0	0	0	0	0	0	0	48	0	0	0	0	0	0	0	0	0	0	0	0	0	0	0	0	0	0	0	0	0	0	0	0	0	0	0
551	MH815757	p:Proteobacteria	f:Hyphomonadaceae(1.0000)	g:Ponticaulis(0.5100)	s:Ponticaulis_koreensis(0.5100)		0	0	0	0	0	0	0	0	5	0	41	0	0	0	0	0	0	0	0	0	0	0	0	0	0	0	0	0	0	0	0	0	0	0	0	0	0	0	0	0	0	0	0
552	MH815758	p:Proteobacteria	f:Rhodospirillaceae(1.0000)	g:Ferrovibrio(1.0000)	s:Ferrovibrio_denitrificans(1.0000)		0	0	0	0	0	0	0	0	0	0	0	0	4	0	0	0	0	2	0	0	0	0	0	0	0	0	0	0	0	0	0	0	0	0	0	0	0	0	0	0	0	0	0
553	MH815759	p:Planctomycetes	f:Planctomycetaceae(0.9500)	g:Pirellula(0.5500)	s:Pirellula_staleyi(0.5500)		0	0	0	0	0	0	0	0	4	0	0	44	0	0	0	0	0	0	0	0	0	0	0	0	0	0	0	0	0	0	0	0	1	0	0	0	0	0	0	0	0	0	0
554	MH815760	p:Firmicutes	f:Paenibacillaceae(1.0000)	g:Paenibacillus(1.0000)	s:Paenibacillus_hordei(0.6800)		0	0	0	0	0	0	10	0	0	0	0	0	0	0	0	0	0	0	0	0	0	0	0	0	0	0	0	0	0	0	0	0	0	0	0	0	0	0	0	0	0	0	0
555	MH815761	p:Firmicutes	f:Unclassified_Clostridiales(0.1900)	g:Anaerococcus(0.1000)	s:Litoricola_lipolytica(0.0500)		0	0	0	0	0	0	0	0	13	0	25	0	0	0	0	0	0	0	0	0	0	0	0	0	0	0	0	0	0	0	0	0	0	0	0	0	0	0	0	0	0	0	0
557	MH815762	p:Bacteroidetes	f:Bacteroidaceae(0.6500)	g:Bacteroides(0.6500)	s:Bacteroides_acidifaciens(0.3700)		0	0	0	0	0	0	5	0	0	0	0	0	0	0	0	0	0	0	0	0	0	0	0	0	0	0	0	0	0	0	0	0	0	0	0	0	0	0	0	0	0	0	0
559	MH815763	p:Proteobacteria	f:Legionellaceae(1.0000)	g:Legionella(1.0000)	s:Legionella_anisa(0.4100)		0	8	14	0	0	0	0	0	3	33	0	0	8	0	0	0	2	0	1	0	0	0	0	0	0	0	0	0	0	0	0	0	0	0	0	0	0	0	0	0	0	0	0
560	MH815764	p:Proteobacteria	f:Pseudomonadaceae(1.0000)	g:Pseudomonas(0.9200)	s:Pseudomonas_citronellolis(0.9200)		0	2	10	0	0	0	3	0	0	37	0	25	0	0	0	0	0	0	0	0	0	0	0	0	0	0	0	0	0	0	0	0	0	0	0	0	0	0	0	0	0	0	0
561	MH815765	p:Planctomycetes	f:Planctomycetaceae(0.9700)	g:Rhodopirellula(0.4800)	s:Pirellula_staleyi(0.4700)		0	0	0	0	0	0	0	1	0	0	0	35	0	0	2	0	20	0	0	0	0	0	0	0	0	0	0	0	0	0	0	0	0	0	0	0	0	0	0	0	0	0	0
564	MH815766	p:Proteobacteria	f:Lysobacteraceae(1.0000)	g:Lysobacter(1.0000)	s:Lysobacter_capsici(0.6900)		0	0	0	0	0	0	0	0	4	0	0	0	0	0	0	49	0	0	0	0	0	0	0	0	0	0	0	0	0	0	0	0	0	0	0	0	0	0	0	0	0	0	0
566	MH815767	p:Verrucomicrobia	f:Verrucomicrobiaceae(0.4300)	g:Verrucomicrobium(0.1400)	s:Verrucomicrobium_spinosum(0.1400)		0	0	0	0	0	0	0	1	0	0	0	0	0	4	0	0	11	0	0	0	0	0	0	0	0	0	0	0	0	0	0	0	0	0	0	0	0	0	0	0	0	0	0
567	MH815768	p:Proteobacteria	f:Alcaligenaceae(1.0000)	g:Candidimonas(0.5400)	s:Candidimonas_nitroreducens(0.3500)		0	1	0	0	0	0	0	0	2	29	0	0	0	0	0	0	0	0	0	0	0	0	0	0	0	0	0	0	0	0	0	0	0	0	0	0	0	0	0	0	0	0	0
569	MH815769	p:Firmicutes	f:Clostridiaceae(0.6700)	g:Alkaliphilus(0.5300)	s:Alkaliphilus_crotonatoxidans(0.3900)		0	0	0	0	0	0	10	0	0	0	0	0	0	0	0	0	0	0	0	0	0	0	0	0	0	0	0	0	0	0	0	0	0	0	0	0	0	0	0	0	0	0	0
570	MH815770	p:Firmicutes	f:Unclassified_Clostridiales(1.0000)	g:Blautia(1.0000)	s:Blautia_wexlerae(1.0000)		0	0	0	0	0	0	6	0	0	0	0	0	0	0	0	0	0	0	0	0	0	0	0	0	0	0	0	0	0	0	0	0	0	0	0	0	0	0	0	0	0	0	0
571	MH815771	p:Proteobacteria	f:Rhodobacteraceae(1.0000)	g:Rubellimicrobium(1.0000)	s:Rubellimicrobium_roseum(0.9700)		0	0	0	0	0	0	0	0	0	0	0	0	0	0	0	33	0	0	0	0	0	0	0	0	0	0	0	0	0	0	0	0	0	0	0	0	0	0	0	0	0	0	0
572	MH815772	p:Bacteroidetes	f:Flavobacteriaceae(1.0000)	g:Flavobacterium(1.0000)	s:Flavobacterium_ummariense(0.9600)		0	0	0	0	0	0	0	0	0	2	0	0	0	0	0	0	20	0	0	0	0	0	0	0	0	0	0	0	0	0	0	0	0	0	0	0	0	0	0	0	0	0	0
573	MH815773	p:Firmicutes	f:Ruminococcaceae(0.4200)	g:Papillibacter(0.3400)	s:Papillibacter_cinnamivorans(0.3400)		0	0	0	0	0	0	5	0	0	0	0	0	0	0	0	0	0	0	0	0	0	0	0	0	0	0	0	0	0	0	0	0	0	0	0	0	0	0	0	0	0	0	0
574	MH815774	p:Bacteroidetes	f:Flavobacteriaceae(0.2200)	g:Clostridium(0.0600)	s:Alkaliphilus_oremlandii(0.0400)		0	0	0	0	0	0	0	0	0	0	0	0	4	0	0	53	3	0	0	0	0	0	0	0	0	0	0	0	0	0	0	0	0	0	0	0	0	0	0	0	0	0	0
575	MH815775	p:Firmicutes	f:Unclassified_Clostridiales(0.1300)	g:Anaerovorax(0.0800)	s:Anaerovorax_odorimutans(0.0800)		0	0	1	0	48	0	0	2	0	0	0	0	0	0	0	0	0	0	0	0	0	0	0	0	0	0	0	0	0	0	0	0	0	0	0	0	0	0	0	0	0	0	0
576	MH815776	p:Proteobacteria	f:Sphingomonadaceae(1.0000)	g:Sphingomonas(1.0000)	s:Sphingomonas_endophytica(1.0000)		0	0	0	0	36	0	2	0	0	0	0	0	0	0	0	0	0	0	0	0	0	0	0	0	0	0	0	0	0	0	1	0	0	0	0	0	0	0	0	0	0	0	0
577	MH815777	p:Proteobacteria	f:Pseudomonadaceae(1.0000)	g:Pseudomonas(0.9300)	s:Pseudomonas_argentinensis(0.8800)		0	0	0	0	0	0	0	0	0	2	0	1	0	0	0	0	36	0	0	0	0	0	0	0	0	0	0	0	0	0	0	0	0	0	0	0	0	0	0	0	0	0	0
578	MH815778	p:Gemmatimonadetes	f:Gemmatimonadaceae(0.4500)	g:Gemmatimonas(0.4500)	s:Gemmatimonas_aurantiaca(0.4500)		0	0	0	0	0	0	0	0	0	33	0	0	0	0	0	0	0	0	0	0	0	0	0	0	0	0	0	0	0	0	0	0	0	0	0	0	0	0	0	0	0	0	0
579	MH815779	p:Bacteroidetes	f:Bacteroidaceae(1.0000)	g:Bacteroides(1.0000)	s:Bacteroides_ovatus(0.9600)		0	0	0	0	0	0	15	0	0	0	0	0	0	0	0	0	0	0	0	0	0	0	0	0	0	0	0	0	0	0	0	0	0	0	0	0	0	0	0	0	0	0	0
580	MH815780	p:Planctomycetes	f:Tepidisphaeraceae(0.9700)	g:Tepidisphaera(0.9700)	s:Tepidisphaera_mucosa(0.9700)		0	2	23	0	22	23	0	1	0	0	0	0	0	0	4	0	0	0	0	0	0	0	0	0	0	0	0	0	0	0	0	0	0	0	0	0	0	0	0	0	0	0	0
581	MH815781	p:Bacteroidetes	f:Unclassified_Cytophagales(0.8400)	g:Chryseolinea(0.7400)	s:Chryseolinea_serpens(0.7400)		0	0	0	0	0	0	0	0	0	28	0	0	0	0	0	0	0	0	0	0	0	0	0	0	0	0	0	0	0	0	0	0	0	0	0	0	0	0	0	0	0	0	0
582	MH815782	p:Proteobacteria	f:Coxiellaceae(1.0000)	g:Diplorickettsia(1.0000)	s:Diplorickettsia_massiliensis(1.0000)		0	0	0	0	0	0	0	0	0	36	0	0	0	0	0	0	0	4	0	0	0	0	0	0	0	1	0	0	0	0	0	0	0	0	0	0	0	0	0	0	0	0	0
583	MH815783	p:Proteobacteria	f:Unclassified_Rhizobiales(0.2700)	g:Blastochloris(0.1900)	s:Bauldia_consociata(0.1800)		0	0	0	0	0	0	0	4	0	46	0	0	13	0	0	0	0	0	0	0	0	0	0	0	0	0	0	0	0	0	0	0	0	0	0	0	0	0	0	0	0	0	0
584	MH815784	p:Armatimonadetes	f:Fimbriimonadaceae(1.0000)	g:Fimbriimonas(1.0000)	s:Fimbriimonas_ginsengisoli(1.0000)		0	0	4	0	0	0	0	0	0	31	0	0	0	0	0	0	20	0	0	0	0	0	0	0	0	0	0	0	0	0	0	0	0	0	0	0	0	0	0	0	0	0	0
586	MH815785	p:Verrucomicrobia	f:Verrucomicrobiaceae(1.0000)	g:Luteolibacter(0.8200)	s:Luteolibacter_luojiensis(0.4900)		0	3	9	0	0	0	0	0	0	0	0	0	0	0	0	31	0	0	0	0	0	0	0	0	0	0	0	0	0	0	0	0	0	0	0	0	0	0	0	0	0	0	0
587	MH815786	p:Chlamydiae	f:Parachlamydiaceae(0.7600)	g:Neochlamydia(0.7100)	s:Neochlamydia_hartmannellae(0.7100)		0	0	0	0	0	0	0	0	0	34	0	0	0	0	0	0	0	0	0	0	0	0	0	0	0	0	0	0	0	0	0	0	0	0	0	0	0	0	0	0	0	0	0
588	MH815787	p:Proteobacteria	f:Campylobacteraceae(0.2800)	g:Caminibacter(0.2000)	s:Arcobacter_nitrofigilis(0.1700)		0	0	0	0	0	0	0	0	0	38	0	0	0	0	0	0	0	0	0	0	0	0	0	0	0	0	0	0	0	0	0	0	0	0	0	0	0	0	0	0	0	0	0
589	MH815788	p:Firmicutes	f:Clostridiaceae(0.1200)	g:Clostridium(0.0900)	s:Thermomarinilinea_lacunifontana(0.0800)		0	0	0	0	0	0	0	0	0	0	0	0	0	0	0	33	0	0	0	0	0	0	0	0	0	0	0	0	0	0	0	0	0	0	0	0	0	0	0	0	0	0	0
591	MH815789	p:Firmicutes	f:Unclassified_Bacillales(0.9900)	g:Exiguobacterium(0.9900)	s:Exiguobacterium_aestuarii(0.9600)		0	0	0	0	0	0	3	0	0	0	0	0	0	0	0	0	0	0	0	0	0	0	0	0	1	0	0	0	0	0	0	0	0	0	0	0	0	0	0	0	0	0	0
592	MH815790	p:Firmicutes	f:Clostridiaceae(0.9900)	g:Clostridium(0.9900)	s:Clostridium_cocleatum(0.9900)		0	0	0	0	0	0	5	0	0	0	0	0	5	0	0	0	0	0	0	0	0	0	0	0	0	0	0	0	0	0	0	0	0	0	0	0	0	0	0	0	0	0	0
593	MH815791	p:Proteobacteria	f:Bdellovibrionaceae(0.2000)	g:Bdellovibrio(0.2000)	s:Bdellovibrio_bacteriovorus(0.1900)		0	0	0	0	0	0	0	1	0	38	0	0	16	0	0	0	0	0	0	0	0	0	0	0	0	0	0	0	0	0	0	0	0	0	0	0	0	0	0	0	0	0	0
597	MH815792	p:Tenericutes	f:Mycoplasmataceae(0.2200)	g:Mycoplasma(0.2200)	s:Mycoplasma_alligatoris(0.1000)		0	0	0	0	0	0	0	0	0	0	0	43	0	0	0	0	0	0	0	0	0	0	0	0	0	0	0	0	0	0	0	0	0	0	0	0	0	0	0	0	0	0	0
598	MH815793	p:Proteobacteria	f:Nevskiaceae(1.0000)	g:Alkanibacter(0.5100)	s:Alkanibacter_difficilis(0.5100)		0	0	3	0	0	0	0	0	5	0	0	40	0	0	0	0	0	5	0	0	0	0	0	0	0	0	0	0	0	0	0	0	0	0	0	0	0	0	0	0	0	0	0
599	MH815794	p:Bacteroidetes	f:Chitinophagaceae(0.5800)	g:Terrimonas(0.3000)	s:Terrimonas_ferruginea(0.2900)		0	0	0	0	2	0	0	0	0	0	0	0	0	0	0	0	0	0	0	0	0	0	0	0	0	0	0	0	0	0	0	0	0	0	0	0	0	0	0	0	0	0	0
600	MH815795	p:Proteobacteria	f:Desulfobulbaceae(0.3000)	g:Desulfonatronum(0.2300)	s:Anaeromyxobacter_dehalogenans(0.1600)		0	0	0	0	13	7	0	0	6	0	0	0	0	0	0	0	0	0	0	0	0	0	0	0	0	0	0	0	0	0	0	0	0	0	0	0	0	0	0	0	0	0	0
601	MH815796	p:Spirochaetes	f:Spirochaetaceae(1.0000)	g:Treponema(1.0000)	s:Treponema_medium(1.0000)		0	0	0	0	0	29	0	0	0	0	0	0	0	0	0	0	0	0	0	0	0	0	0	0	0	0	0	0	0	0	0	0	0	0	0	0	0	0	0	0	0	0	0
602	MH815797	p:Proteobacteria	f:Bdellovibrionaceae(0.9500)	g:Vampirovibrio(0.9500)	s:Vampirovibrio_chlorellavorus(0.9500)		0	0	0	0	0	0	0	0	0	0	0	0	0	0	0	32	0	0	0	0	0	0	0	0	0	0	0	0	0	0	0	0	0	0	0	0	0	0	0	0	0	0	0
604	MH815798	p:Proteobacteria	f:Bradyrhizobiaceae(0.4800)	g:Bradyrhizobium(0.4100)	s:Bradyrhizobium_ganzhouense(0.3200)		0	0	0	0	0	0	0	0	0	0	0	42	0	0	0	0	0	0	0	0	0	0	0	0	0	0	0	0	0	0	0	0	0	0	0	0	0	0	0	0	0	0	0
605	MH815799	p:Firmicutes	f:Unclassified_Clostridiales(0.1900)	g:Eubacterium(0.1100)	s:Guggenheimella_bovis(0.1100)		0	0	0	0	0	0	0	0	0	0	0	37	0	0	0	0	0	0	0	0	0	0	0	0	0	0	0	0	0	0	0	0	0	0	0	0	0	0	0	0	0	0	0
606	MH815800	p:Proteobacteria	f:Caulobacteraceae(1.0000)	g:Caulobacter(0.9900)	s:Caulobacter_ginsengisoli(0.9500)		0	0	3	0	0	0	0	0	0	0	0	0	0	0	0	0	29	0	0	0	0	0	0	0	0	0	1	0	0	0	0	0	0	0	0	0	0	0	0	0	0	0	0
607	MH815801	p:Bacteroidetes	f:Porphyromonadaceae(0.9900)	g:Paludibacter(0.9900)	s:Paludibacter_propionicigenes(0.9900)		0	0	0	0	0	0	0	0	0	0	0	84	0	0	0	0	0	0	0	0	0	0	0	0	0	0	0	0	0	0	0	0	0	0	0	0	0	0	0	0	0	0	0
609	MH815802	p:Proteobacteria	f:Unclassified_Rhizobiales(0.3500)	g:Amorphus(0.2700)	s:Amorphus_coralli(0.2200)		0	0	2	0	0	0	0	0	0	55	0	0	0	6	0	0	0	0	0	0	0	0	0	0	0	0	0	0	0	0	0	0	0	0	0	0	0	0	1	0	0	0	0
611	MH815803	p:Bacteroidetes	f:Flavobacteriaceae(1.0000)	g:Flavobacterium(1.0000)	s:Flavobacterium_cheonhonense(0.4100)		0	1	10	0	0	11	0	2	0	19	0	0	10	2	0	0	0	0	0	0	0	0	0	0	0	0	0	0	0	0	0	0	0	0	0	0	0	0	0	0	0	0	0
612	MH815804	p:Verrucomicrobia	f:Unclassified_Spartobacteria(0.9000)	g:Terrimicrobium(0.9000)	s:Terrimicrobium_sacchariphilum(0.9000)		1	8	28	0	0	0	0	0	0	0	0	0	0	0	0	0	0	0	0	0	0	0	0	0	0	0	0	0	0	0	0	0	0	0	0	0	0	0	0	0	0	0	0
614	MH815805	p:Proteobacteria	f:Unclassified_Rhizobiales(0.9300)	g:Alsobacter(0.9300)	s:Alsobacter_metallidurans(0.9300)		0	0	0	0	0	0	0	0	5	0	0	0	0	0	0	0	0	0	0	0	0	0	0	0	0	0	0	0	0	0	0	0	0	0	0	0	0	0	0	0	0	0	0
615	MH815806	p:Proteobacteria	f:Rhodocyclaceae(0.6300)	g:Azoarcus(0.4100)	s:Azoarcus_anaerobius(0.2200)		0	0	0	0	0	0	1	0	0	0	13	0	0	0	0	0	0	0	0	0	0	0	0	0	0	0	0	0	0	0	0	0	0	0	0	1	0	0	1	0	0	0	0
616	MH815807	p:Proteobacteria	f:Bartonellaceae(0.0900)	g:Bartonella(0.0900)	s:Bartonella_acomydis(0.0700)		0	0	1	0	0	6	0	0	0	0	0	43	0	0	0	0	0	0	0	0	0	0	0	0	0	0	0	0	0	0	0	0	0	0	0	0	0	0	0	0	0	0	0
617	MH815808	p:Cyanobacteria	f:Prochlorococcaceae(1.0000)	g:Prochlorococcus(1.0000)	s:Prochlorococcus_marinus_subsp._marinus(0.7700)		1	0	0	0	42	0	0	0	0	0	11	0	0	0	0	0	0	0	0	0	0	0	0	0	0	0	0	0	0	2	0	0	0	0	0	0	0	0	0	0	0	0	0
618	MH815809	p:Bacteroidetes	f:Prevotellaceae(1.0000)	g:Prevotella(1.0000)	s:Prevotella_bivia(1.0000)		0	0	0	0	0	0	0	0	0	0	0	0	0	0	22	0	0	0	0	0	0	0	0	0	0	0	0	0	0	0	0	0	0	0	0	0	0	0	0	0	0	0	0
619	MH815810	p:Bacteroidetes	f:Cytophagaceae(1.0000)	g:Pseudarcicella(0.7400)	s:Pseudarcicella_hirudinis(0.7400)		0	0	0	0	0	0	0	0	0	0	0	0	0	0	0	0	0	0	0	0	0	0	0	0	0	0	0	0	0	19	0	0	0	0	0	0	0	0	0	0	0	0	0
620	MH815811	p:Actinobacteria	f:Microbacteriaceae(1.0000)	g:Rhodoluna(0.9800)	s:Rhodoluna_lacicola(0.9800)		0	0	0	0	0	0	0	0	0	3	0	0	5	0	0	0	0	0	0	0	0	0	0	0	0	0	0	0	0	17	0	0	0	0	0	0	0	0	0	2	0	0	0
621	MH815812	p:Chlamydiae	f:Parachlamydiaceae(0.9700)	g:Parachlamydia(0.8900)	s:Parachlamydia_acanthamoebae(0.8900)		1	0	0	0	0	0	0	0	0	0	0	34	0	0	0	0	0	0	0	0	0	0	0	0	0	0	0	0	0	0	0	0	0	0	0	0	0	0	0	0	0	0	0
623	MH815813	p:Actinobacteria	f:Micromonosporaceae(0.2900)	g:Actinocatenispora(0.2700)	s:Actinocatenispora_sera(0.1800)		0	0	0	0	1	0	0	0	2	0	0	0	0	4	0	0	20	0	0	0	0	0	0	0	0	0	0	0	0	0	0	0	0	0	0	0	0	0	0	0	0	0	0
624	MH815814	p:Proteobacteria	f:Methylococcaceae(1.0000)	g:Methylosoma(0.8400)	s:Methylosoma_difficile(0.8400)		0	0	0	0	0	0	0	0	0	0	0	0	0	0	0	36	0	0	0	0	0	0	0	0	0	0	0	0	0	0	0	0	0	0	0	0	0	0	0	0	0	0	0
625	MH815815	p:Proteobacteria	f:Rhodocyclaceae(0.8000)	g:Azoarcus(0.3300)	s:Georgfuchsia_toluolica(0.3300)		0	0	7	0	0	0	0	0	0	0	16	0	0	1	3	0	10	1	0	0	0	0	0	0	0	0	0	0	0	0	0	0	0	0	0	0	0	0	0	0	0	0	0
626	MH815816	p:Actinobacteria	f:Nocardioidaceae(1.0000)	g:Nocardioides(1.0000)	s:Nocardioides_exalbidus(0.6400)		0	0	5	0	0	0	0	0	0	23	0	0	0	0	0	0	18	0	0	0	0	0	0	0	0	0	0	0	0	0	0	0	0	0	0	0	0	0	0	0	0	0	0
627	MH815817	p:Bacteroidetes	f:Chitinophagaceae(1.0000)	g:Terrimonas(1.0000)	s:Terrimonas_lutea(0.8900)		0	1	2	0	0	0	1	0	0	0	0	0	0	0	0	0	30	1	0	0	0	0	0	0	0	0	0	0	0	0	0	0	0	0	0	0	0	0	0	0	0	0	0
628	MH815818	p:Bacteroidetes	f:Rikenellaceae(0.7300)	g:Rikenella(0.5000)	s:Rikenella_microfusus(0.5000)		0	0	0	0	0	0	5	0	0	0	0	0	0	0	0	0	0	0	0	0	0	0	0	0	0	0	0	0	0	0	0	0	0	0	0	0	0	0	0	0	0	0	0
630	MH815819	p:Proteobacteria	f:Ectothiorhodospiraceae(0.1000)	g:Exilispira(0.0600)	s:Exilispira_thermophila(0.0600)		0	0	0	0	0	0	0	0	0	0	0	0	0	0	0	0	0	0	0	0	0	0	0	0	0	0	0	0	0	4	0	0	0	0	0	0	0	0	0	0	0	0	0
631	MH815820	p:Proteobacteria	f:Comamonadaceae(0.5400)	g:Acidovorax(0.3500)	s:Methylibium_petroleiphilum(0.2600)		1	208	707	0	34	21	4	0	2	104	9	45	12	2	1	102	47	10	1	0	1	0	0	0	1	0	0	0	0	2	0	0	2	0	0	0	0	0	0	1	0	0	0
633	MH815821	p:Proteobacteria	f:Neisseriaceae(0.1400)	g:Aquaspirillum(0.1100)	s:Aquaspirillum_serpens(0.1000)		0	0	0	0	0	0	0	0	0	61	0	0	0	0	0	0	0	0	0	0	0	0	0	0	0	0	0	0	0	0	0	0	0	0	0	0	0	0	0	0	0	0	0
634	MH815822	p:Proteobacteria	f:Nitrosomonadaceae(0.5100)	g:Nitrosomonas(0.5000)	s:Nitrosomonas_europaea(0.3800)		0	0	0	0	0	0	3	0	0	0	0	0	0	0	0	0	0	0	0	0	0	0	0	0	0	0	0	0	0	0	0	0	0	0	0	0	0	0	0	0	0	0	0
635	MH815823	p:Bacteroidetes	f:Prevotellaceae(1.0000)	g:Prevotella(1.0000)	s:Prevotella_corporis(1.0000)		0	0	0	0	0	0	1	0	0	36	0	0	0	0	0	0	0	0	0	0	0	0	0	0	0	0	0	0	0	0	0	0	0	0	0	0	0	0	0	0	0	0	0
636	MH815824	p:Planctomycetes	f:Planctomycetaceae(0.2600)	g:Blastopirellula(0.2500)	s:Blastopirellula_cremea(0.2000)		0	0	0	0	0	0	0	0	0	32	0	0	0	0	0	0	0	0	0	0	0	0	0	0	0	0	0	0	0	0	0	0	0	0	0	0	0	0	0	0	0	0	0
638	MH815825	p:Proteobacteria	f:Burkholderiaceae(0.6000)	g:Polynucleobacter(0.3900)	s:Polynucleobacter_acidiphobus(0.2300)		0	3	21	0	0	0	0	0	0	0	0	0	4	0	0	0	11	0	0	0	0	1	0	0	0	0	0	0	0	0	0	0	0	0	0	0	0	0	0	0	0	0	0
639	MH815826	p:Proteobacteria	f:Comamonadaceae(1.0000)	g:Hydrogenophaga(1.0000)	s:Hydrogenophaga_intermedia(1.0000)		0	90	382	0	24	14	0	0	0	0	27	34	7	3	5	74	86	7	0	0	3	0	0	0	1	0	0	0	0	0	0	0	0	0	0	0	21	0	0	1	0	0	0
640	MH815827	p:Proteobacteria	f:Bradyrhizobiaceae(1.0000)	g:Rhodopseudomonas(0.9400)	s:Rhodopseudomonas_harwoodiae(0.9100)		0	0	2	0	0	0	1	0	0	0	11	33	0	0	0	0	0	0	0	0	0	0	0	0	0	0	0	0	0	0	0	0	0	0	0	0	0	0	0	0	0	0	0
642	MH815828	p:Proteobacteria	f:Bdellovibrionaceae(0.3400)	g:Vampirovibrio(0.3400)	s:Vampirovibrio_chlorellavorus(0.3400)		0	0	0	0	0	0	0	0	0	0	0	46	0	0	0	0	0	0	0	0	0	0	0	0	0	0	0	0	0	0	0	0	0	0	0	0	0	0	0	0	0	0	0
643	MH815829	p:Proteobacteria	f:Ectothiorhodospiraceae(0.7400)	g:Arhodomonas(0.6000)	s:Arhodomonas_recens(0.5800)		0	0	0	0	0	0	7	0	0	0	0	0	0	0	0	0	0	0	0	0	0	0	0	0	0	0	0	0	0	0	0	0	0	0	0	0	0	0	0	0	0	0	0
644	MH815830	p:Bacteroidetes	f:Cytophagaceae(1.0000)	g:Cytophaga(1.0000)	s:Cytophaga_hutchinsonii(0.5600)		0	0	2	0	0	0	0	4	0	0	0	0	0	0	0	0	0	0	0	0	0	0	0	0	0	0	0	0	0	0	0	0	0	0	0	0	0	0	0	0	0	0	0
645	MH815831	p:Firmicutes	f:Peptoniphilaceae(1.0000)	g:Ezakiella(1.0000)	s:Ezakiella_peruensis(1.0000)		0	0	0	0	0	0	0	0	0	0	0	0	0	0	0	0	0	8	0	0	0	0	0	0	0	0	0	0	0	0	0	0	0	0	0	0	0	0	0	0	0	0	0
646	MH815832	p:Bacteroidetes	f:Sphingobacteriaceae(1.0000)	g:Pedobacter(0.7100)	s:Pedobacter_arcticus(0.6500)		0	0	10	0	0	0	0	0	3	0	0	0	0	0	0	0	9	2	0	0	0	0	0	0	0	0	0	0	0	0	0	0	0	0	0	0	0	0	0	0	0	0	0
648	MH815833	p:Proteobacteria	f:Bacteriovoracaceae(1.0000)	g:Peredibacter(1.0000)	s:Peredibacter_starrii(1.0000)		0	0	0	0	0	0	0	0	0	0	0	40	0	0	0	0	0	0	0	0	0	0	0	0	0	0	0	0	0	0	0	0	0	0	0	0	0	0	0	0	0	0	0
649	MH815834	p:Firmicutes	f:Clostridiaceae(0.4200)	g:Clostridium(0.4000)	s:Clostridium_aldenense(0.2900)		0	0	0	0	0	0	3	0	0	0	0	0	0	0	0	0	0	0	0	0	0	0	0	0	0	0	0	0	0	0	0	0	0	0	0	0	0	0	0	0	0	0	0
651	MH815835	p:Actinobacteria	f:Actinomycetaceae(0.4900)	g:Arcanobacterium(0.1900)	s:Actinobaculum_suis(0.0900)		0	0	0	0	0	0	1	0	0	0	0	0	0	0	0	0	0	0	0	0	0	0	0	0	0	0	0	0	0	19	0	0	0	0	0	0	0	0	1	0	0	0	0
652	MH815836	p:Proteobacteria	f:Armatimonadaceae(0.3900)	g:Armatimonas(0.3900)	s:Armatimonas_rosea(0.3900)		0	0	0	0	0	0	9	0	0	0	0	0	0	0	0	0	0	0	0	0	0	0	0	0	0	0	0	0	0	0	0	0	0	0	0	0	0	0	0	0	0	0	0
654	MH815837	p:Bacteroidetes	f:Sphingobacteriaceae(1.0000)	g:Mucilaginibacter(1.0000)	s:Mucilaginibacter_rigui(0.9800)		0	5	22	0	0	0	0	0	0	0	0	0	0	0	0	0	0	0	0	0	0	0	0	0	0	0	0	0	0	0	0	0	0	0	0	0	0	0	0	0	0	0	0
655	MH815838	p:Firmicutes	f:Clostridiaceae(0.9500)	g:Clostridium(0.9500)	s:Clostridium_cocleatum(0.8700)		0	0	0	0	0	9	2	0	0	0	0	0	0	0	0	0	0	0	0	0	0	0	0	0	0	0	0	0	0	0	0	0	0	0	0	0	0	0	0	0	0	0	0
656	MH815839	p:Firmicutes	f:Ruminococcaceae(0.5100)	g:Clostridium(0.2900)	s:Anaerotruncus_colihominis(0.2800)		0	0	0	0	0	0	21	0	0	0	0	0	0	0	0	0	0	0	0	0	0	0	0	0	0	0	0	0	0	0	0	0	0	0	0	0	0	0	0	0	0	0	0
658	MH815840	p:Bacteroidetes	f:Flavobacteriaceae(1.0000)	g:Flavobacterium(0.9900)	s:Flavobacterium_lindanitolerans(0.9000)		0	0	3	0	0	0	4	0	0	0	22	0	3	0	0	0	0	6	0	0	0	0	0	0	0	0	0	0	0	0	0	0	0	0	0	0	0	0	0	0	0	0	0
660	MH815841	p:Bacteroidetes	f:Flavobacteriaceae(1.0000)	g:Chryseobacterium(0.7100)	s:Chryseobacterium_taklimakanense(0.3100)		0	0	0	0	0	30	0	0	0	0	0	0	0	0	0	0	0	0	0	0	0	0	0	0	0	0	0	0	0	0	0	0	0	0	0	0	0	0	0	0	0	0	0
661	MH815842	p:Bacteroidetes	f:Flavobacteriaceae(1.0000)	g:Capnocytophaga(1.0000)	s:Capnocytophaga_gingivalis(0.6600)		0	0	0	0	0	0	0	0	0	0	32	0	0	0	0	0	0	0	0	0	0	0	0	0	0	0	0	0	0	0	0	0	0	0	0	0	0	0	0	0	0	0	0
662	MH815843	p:Proteobacteria	f:Rhodospirillaceae(0.8000)	g:Aestuariispira(0.4800)	s:Aestuariispira_insulae(0.4800)		0	0	0	0	0	0	4	0	0	0	0	0	0	0	0	0	0	0	0	0	0	0	0	0	0	0	0	0	0	0	0	0	0	0	0	0	0	0	0	0	0	0	0
663	MH815844	p:Firmicutes	f:Leuconostocaceae(0.1700)	g:Oenococcus(0.1600)	s:Eubacterium_yurii_subsp._margaretiae(0.0900)		0	0	0	0	0	0	0	0	0	0	0	0	0	0	10	0	0	19	0	0	0	0	0	0	0	0	0	0	0	0	0	0	0	0	0	0	0	0	0	0	0	0	0
664	MH815845	p:Firmicutes	f:Bacillaceae(0.4200)	g:Bacillus(0.3700)	s:Bacillus_endoradicis(0.2300)		0	0	5	0	0	0	0	0	0	0	0	0	7	1	0	0	0	4	0	0	0	0	0	0	0	0	0	0	0	0	0	0	0	0	0	0	0	0	0	0	0	0	0
665	MH815846	p:Proteobacteria	f:Desulfovibrionaceae(0.2000)	g:Desulfovibrio(0.2000)	s:Desulfovibrio_tunisiensis(0.1300)		0	0	0	0	0	2	0	0	0	0	0	0	0	0	0	0	0	0	0	0	0	0	0	0	0	0	0	0	0	0	0	0	0	0	0	0	0	0	0	0	0	0	0
667	MH815847	p:Proteobacteria	f:Desulfohalobiaceae(0.0900)	g:Clostridium(0.0700)	s:Desulfonatronospira_thiodismutans(0.0600)		0	0	2	0	0	0	0	0	0	37	4	0	0	0	0	0	0	0	0	0	0	0	0	0	0	0	0	0	0	0	0	0	0	0	0	0	0	0	0	0	0	0	0
670	MH815848	p:Proteobacteria	f:Xanthobacteraceae(0.7100)	g:Pseudolabrys(0.7000)	s:Pseudolabrys_taiwanensis(0.7000)		0	0	2	0	8	0	0	1	0	0	0	0	0	0	4	0	0	0	0	0	0	0	0	0	0	0	0	0	0	0	0	0	0	0	0	0	0	0	0	0	0	0	0
671	MH815849	p:Bacteroidetes	f:Porphyromonadaceae(0.8800)	g:Dysgonomonas(0.5800)	s:Dysgonomonas_macrotermitis(0.3500)		0	0	0	0	0	0	0	0	5	0	0	0	0	1	0	0	16	0	0	0	0	0	0	0	0	0	0	0	0	0	0	0	0	0	0	0	0	0	0	0	0	0	0
672	MH815850	p:Bacteroidetes	f:Flavobacteriaceae(0.2200)	g:Carboxylicivirga(0.1500)	s:Carboxylicivirga_mesophila(0.1500)		0	0	0	0	0	0	10	0	0	0	0	0	0	0	0	0	0	0	0	0	0	0	0	0	0	0	0	0	0	0	0	0	0	0	0	0	0	0	0	0	0	0	0
674	MH815851	p:Actinobacteria	f:Microbacteriaceae(0.2600)	g:Demequina(0.2500)	s:Alpinimonas_psychrophila(0.1700)		0	0	0	0	0	0	0	0	0	0	4	0	5	0	0	0	0	0	0	0	0	0	0	0	0	0	0	0	0	5	0	0	0	0	0	0	0	0	1	0	0	0	0
675	MH815852	p:Acidobacteria	f:Acidobacteriaceae(1.0000)	g:Acidobacterium(0.9100)	s:Acidobacterium_capsulatum(0.9100)		0	0	0	0	18	0	1	0	0	0	0	0	0	0	0	0	0	0	0	0	0	0	0	0	0	0	0	0	0	0	0	0	0	0	0	0	0	0	0	0	0	0	0
676	MH815853	p:Proteobacteria	f:Pseudomonadaceae(1.0000)	g:Cellvibrio(1.0000)	s:Cellvibrio_gandavensis(1.0000)		0	0	0	0	0	0	0	0	6	0	0	32	0	0	0	0	0	0	0	0	0	0	0	0	0	0	0	0	0	0	0	0	0	0	0	0	0	0	0	0	0	0	0
679	MH815854	p:Firmicutes	f:Lachnospiraceae(0.7300)	g:Moryella(0.3900)	s:Moryella_indoligenes(0.3900)		0	0	0	0	0	0	0	0	0	26	0	0	0	0	0	0	0	0	0	0	0	0	0	0	0	0	0	0	0	0	0	0	0	0	0	0	0	0	0	0	0	0	0
680	MH815855	p:Tenericutes	f:Entomoplasmataceae(0.2400)	g:Entomoplasma(0.2100)	s:Entomoplasma_freundtii(0.2000)		0	0	0	0	0	0	0	0	0	0	0	38	0	0	0	0	0	0	0	0	0	0	0	0	0	0	0	0	0	0	0	0	0	0	0	0	0	0	0	0	0	0	0
681	MH815856	p:Actinobacteria	f:Nocardiaceae(1.0000)	g:Nocardia(1.0000)	s:Nocardia_aobensis(0.6000)		0	0	0	0	0	0	12	0	0	0	0	0	0	0	0	0	0	0	0	0	0	0	0	0	0	0	0	0	0	0	0	0	0	0	0	0	0	0	0	0	0	0	0
683	MH815857	p:Proteobacteria	f:Rhodobacteraceae(0.9600)	g:Citreicella(0.2100)	s:Citreicella_marina(0.2000)		0	0	0	0	0	6	0	0	0	0	0	0	0	0	7	0	9	0	0	0	0	0	0	0	0	0	0	0	0	0	0	0	0	0	0	0	0	0	0	0	0	0	0
685	MH815858	p:Bacteroidetes	f:Bacteroidaceae(0.1800)	g:Bacteroides(0.1400)	s:Bacteroides_coagulans(0.1400)		0	0	0	0	0	0	0	0	0	0	0	0	0	2	0	0	28	0	0	0	0	0	0	0	0	0	0	0	0	0	0	0	0	0	0	0	0	0	0	0	0	0	0
686	MH815859	p:Proteobacteria	f:Rhodobacteraceae(0.5100)	g:Ahrensia(0.3900)	s:Ahrensia_kielensis(0.3900)		0	0	0	0	0	0	0	0	0	0	5	0	0	2	0	20	0	0	0	0	0	0	0	0	0	0	0	0	0	0	0	0	0	0	0	0	0	0	0	0	0	0	0
690	MH815860	p:Actinobacteria	f:Conexibacteraceae(0.3300)	g:Conexibacter(0.3300)	s:Conexibacter_arvalis(0.2400)		0	0	0	0	0	0	0	0	0	34	0	0	0	0	0	0	0	0	0	0	0	0	0	0	0	0	0	0	0	0	0	0	0	0	0	0	0	0	0	0	0	0	0
691	MH815861	p:Bacteroidetes	f:Chitinophagaceae(0.9700)	g:Taibaiella(0.3300)	s:Taibaiella_koreensis(0.3300)		0	2	18	0	0	0	0	0	14	0	0	0	0	0	0	0	9	0	0	0	0	0	0	0	0	0	0	0	0	0	0	0	0	0	0	0	0	0	0	0	0	0	0
692	MH815862	p:Proteobacteria	f:Rhodanobacteraceae(0.1500)	g:Bacillus(0.0800)	s:Bacillus_aquimaris(0.0600)		0	0	0	0	0	0	0	0	0	0	0	32	0	0	0	0	0	0	0	0	0	0	0	0	0	0	0	0	0	0	0	0	0	0	0	0	0	0	0	0	0	0	0
693	MH815863	p:Proteobacteria	f:Burkholderiaceae(1.0000)	g:Burkholderia(1.0000)	s:Burkholderia_cordobensis(0.4300)		0	0	0	0	0	0	0	0	0	32	0	0	0	0	0	0	0	0	0	0	0	0	0	0	0	0	0	0	0	0	0	0	0	0	0	0	0	0	0	0	0	0	0
694	MH815864	p:Proteobacteria	f:Rhizobiaceae(0.7800)	g:Rhizobium(0.7800)	s:Rhizobium_mesoamericanum(0.3800)		0	6	13	0	0	0	0	0	8	0	0	0	0	0	0	0	0	0	0	0	0	0	2	0	0	0	0	0	0	0	0	0	0	0	0	0	0	0	0	0	0	0	0
696	MH815865	p:Verrucomicrobia	f:Unclassified_Spartobacteria(0.4700)	g:Limisphaera(0.4700)	s:Limisphaera_ngatamarikiensis(0.4700)		0	0	0	0	0	0	6	0	0	0	0	0	0	0	0	0	0	0	0	0	0	0	0	0	0	0	0	0	0	0	0	0	0	0	0	0	0	0	0	0	0	0	0
697	MH815866	p:Proteobacteria	f:Sphingomonadaceae(1.0000)	g:Novosphingobium(0.3400)	s:Sphingomonas_aestuarii(0.1800)		0	0	0	0	0	0	0	0	0	29	0	0	0	0	0	0	0	0	0	0	0	0	0	0	0	0	0	0	0	0	0	0	0	0	0	0	0	0	0	0	0	0	0
698	MH815867	p:Acidobacteria	f:Acidobacteriaceae(1.0000)	g:Bryocella(0.6700)	s:Bryocella_elongata(0.6700)		0	0	0	0	0	0	10	0	0	0	0	0	0	0	0	0	0	0	0	0	0	0	0	0	0	0	0	0	0	0	0	0	0	0	0	0	0	0	0	0	0	0	0
699	MH815868	p:Actinobacteria	f:Nocardiaceae(1.0000)	g:Nocardia(1.0000)	s:Nocardia_coeliaca(1.0000)		0	1	0	0	0	4	0	0	0	0	0	0	0	0	0	0	35	0	0	0	0	0	0	0	1	0	1	0	0	3	0	0	0	0	0	0	0	0	0	0	0	0	0
700	MH815869	p:Firmicutes	f:Clostridiaceae(0.6600)	g:Lutispora(0.4000)	s:Lutispora_thermophila(0.4000)		0	0	0	0	0	0	0	0	0	0	0	0	0	0	0	0	0	0	0	0	0	0	0	0	0	0	0	0	0	0	0	0	0	0	0	0	24	0	0	0	0	0	0
701	MH815870	p:Firmicutes	f:Paenibacillaceae(0.1700)	g:Paenibacillus(0.1500)	s:Dethiobacter_alkaliphilus(0.1000)		0	0	0	0	0	0	0	0	0	32	13	0	0	0	0	0	0	0	0	0	0	0	0	0	0	0	0	0	0	0	0	0	0	0	0	0	0	0	0	0	0	0	0
702	MH815871	p:Proteobacteria	f:Caulobacteraceae(0.9600)	g:Brevundimonas(0.7300)	s:Brevundimonas_abyssalis(0.6800)		0	0	0	0	0	0	5	0	0	0	0	0	0	0	0	0	0	0	0	0	0	0	0	0	0	0	0	0	0	0	0	0	0	0	0	0	0	0	0	0	0	0	0
703	MH815872	p:Proteobacteria	f:Burkholderiaceae(0.9400)	g:Limnobacter(0.9200)	s:Limnobacter_thiooxidans(0.9200)		0	0	0	0	0	0	0	0	0	0	0	18	0	0	0	0	0	3	0	0	0	0	0	0	0	0	0	0	0	0	0	1	0	0	0	0	0	0	0	0	0	0	0
704	MH815873	p:Chlamydiae	f:Parachlamydiaceae(0.7300)	g:Parachlamydia(0.5300)	s:Parachlamydia_acanthamoebae(0.5300)		0	0	0	0	0	0	0	0	0	0	0	21	0	3	0	0	0	0	0	0	0	0	0	0	0	0	0	0	0	0	0	0	0	0	0	0	0	0	0	0	0	0	0
707	MH815874	p:Actinobacteria	f:Cellulomonadaceae(0.3300)	g:Actinotalea(0.3100)	s:Actinotalea_fermentans(0.2900)		0	0	0	0	0	14	0	0	0	0	0	0	0	0	0	0	0	0	0	0	0	0	0	0	0	0	0	0	0	0	0	0	0	0	0	0	0	0	0	0	0	0	0
708	MH815875	p:Planctomycetes	f:Planctomycetaceae(1.0000)	g:Blastopirellula(0.6900)	s:Blastopirellula_cremea(0.6400)		0	0	0	0	0	0	0	0	0	0	0	0	0	0	0	0	24	0	0	0	0	0	0	0	0	0	0	0	0	0	0	0	0	0	0	0	0	0	0	0	0	0	0
710	MH815876	p:Firmicutes	f:Ruminococcaceae(0.4500)	g:Clostridium(0.3600)	s:Anaerotruncus_colihominis(0.2300)		0	0	0	0	0	0	10	0	0	0	0	0	0	0	0	0	0	0	0	0	0	0	0	0	0	0	0	0	0	0	0	0	0	0	0	0	0	0	0	0	0	1	0
711	MH815877	p:Proteobacteria	f:Hyphomicrobiaceae(0.3300)	g:Blastochloris(0.3100)	s:Martelella_mangrovi(0.2000)		0	2	15	0	12	0	0	0	11	0	0	0	0	0	0	0	0	3	0	0	0	0	0	0	0	0	0	0	0	0	0	0	0	0	0	0	0	0	0	0	0	0	0
712	MH815878	p:Planctomycetes	f:Planctomycetaceae(0.9000)	g:Blastopirellula(0.5100)	s:Blastopirellula_cremea(0.4700)		0	0	0	0	0	0	0	0	0	0	0	0	0	0	0	0	0	0	0	0	0	0	0	0	0	0	0	0	0	0	0	0	0	0	0	0	36	0	0	0	0	0	0
714	MH815879	p:Actinobacteria	f:Brevibacteriaceae(1.0000)	g:Brevibacterium(1.0000)	s:Brevibacterium_avium(0.8400)		0	0	0	0	0	0	2	0	0	0	0	0	0	0	0	0	0	0	0	0	0	0	0	0	0	0	0	0	0	0	0	0	0	0	0	0	0	0	0	0	0	0	0
715	MH815880	p:Proteobacteria	f:Halomonadaceae(1.0000)	g:Zymobacter(0.9900)	s:Zymobacter_palmae(0.9900)		0	0	0	0	0	0	3	0	0	0	0	0	0	0	0	0	0	0	0	0	0	0	0	0	0	0	0	0	0	0	0	0	0	0	0	0	0	0	0	0	0	0	0
716	MH815881	p:Firmicutes	f:Clostridiaceae(0.0700)	g:Aureispira(0.0700)	s:Aureispira_marina(0.0700)		0	0	1	0	0	0	0	0	0	37	0	0	0	0	0	0	0	0	0	0	0	0	0	0	0	0	0	0	0	0	0	0	0	0	0	0	0	0	0	0	0	0	0
717	MH815882	p:Bacteroidetes	f:Rikenellaceae(0.8800)	g:Alistipes(0.8800)	s:Alistipes_finegoldii(0.4700)		0	0	0	0	0	0	4	0	0	0	0	0	0	0	0	0	0	0	0	0	0	0	0	0	0	0	0	0	0	0	0	0	0	0	0	0	0	0	0	0	0	0	0
718	MH815883	p:Actinobacteria	f:Nocardiaceae(1.0000)	g:Rhodococcus(1.0000)	s:Rhodococcus_cerastii(1.0000)		0	0	0	0	15	0	1	0	0	18	0	0	0	0	0	0	0	0	0	0	0	0	0	0	0	0	1	0	0	0	0	0	0	0	0	0	0	0	0	0	0	0	0
719	MH815884	p:Tenericutes	f:Mycoplasmataceae(0.1900)	g:Mycoplasma(0.1900)	s:Bifidobacterium_biavatii(0.0500)		0	0	0	0	0	0	0	0	0	35	0	0	0	0	0	0	0	0	0	0	0	0	0	0	0	0	0	0	0	0	0	0	0	0	0	0	0	0	0	0	0	0	0
720	MH815885	p:Bacteroidetes	f:Flavobacteriaceae(0.1700)	g:Flavobacterium(0.0900)	s:Flavobacterium_ponti(0.0500)		0	0	0	0	0	0	0	0	0	33	0	0	0	0	0	0	0	0	0	0	0	0	0	0	0	0	0	0	0	0	0	0	0	0	0	0	0	0	0	0	0	0	0
721	MH815886	p:Proteobacteria	f:Legionellaceae(0.7800)	g:Legionella(0.7800)	s:Legionella_drancourtii(0.5000)		0	0	0	0	0	0	0	0	0	27	0	0	0	0	0	0	0	0	0	0	0	0	0	0	0	0	0	0	0	0	0	0	0	0	0	0	0	0	0	0	0	0	0
722	MH815887	p:Actinobacteria	f:Geodermatophilaceae(0.9900)	g:Modestobacter(0.5500)	s:Modestobacter_multiseptatus(0.5500)		0	0	0	0	13	0	0	0	5	0	0	0	0	0	10	0	0	0	0	0	0	0	0	0	0	0	0	0	0	0	0	0	0	0	0	0	0	0	0	0	0	0	0
724	MH815888	p:Actinobacteria	f:Nakamurellaceae(0.9900)	g:Nakamurella(0.9900)	s:Nakamurella_flavida(0.7800)		0	0	0	0	0	0	0	0	0	29	0	0	0	0	0	0	12	0	0	0	0	1	0	0	0	0	0	0	0	0	0	0	0	0	0	0	0	0	0	0	0	0	0
725	MH815889	p:Firmicutes	f:Clostridiaceae(0.9900)	g:Tepidimicrobium(0.9400)	s:Tepidimicrobium_xylanilyticum(0.8900)		0	0	0	0	0	0	0	0	0	0	22	0	0	0	0	0	0	0	0	0	0	0	0	0	0	0	0	0	0	0	0	0	0	1	0	0	0	0	0	0	0	0	0
726	MH815890	p:Firmicutes	f:Paenibacillaceae(0.7200)	g:Brevibacillus(0.4600)	s:Brevibacillus_aydinogluensis(0.4100)		0	0	0	0	0	8	0	0	0	28	11	0	0	0	0	0	0	0	0	0	0	0	0	0	0	0	0	0	0	0	0	0	0	0	0	0	0	0	0	0	0	0	0
727	MH815891	p:Proteobacteria	f:Hyphomicrobiaceae(0.4800)	g:Blastochloris(0.4700)	s:Blastochloris_sulfoviridis(0.3200)		0	0	0	0	0	0	0	1	0	28	0	0	0	0	0	0	15	2	0	0	0	0	0	0	0	0	0	0	0	0	0	0	0	0	0	0	0	0	0	0	0	0	0
728	MH815892	p:Proteobacteria	f:Burkholderiaceae(0.4900)	g:Burkholderia(0.2800)	s:Burkholderia_ferrariae(0.1900)		0	0	0	0	0	0	0	0	0	32	0	0	0	0	0	0	0	0	0	0	0	0	0	0	0	0	0	0	0	0	0	0	0	0	0	0	0	0	0	0	0	0	0
729	MH815893	p:Firmicutes	f:Lactobacillaceae(1.0000)	g:Lactobacillus(1.0000)	s:Lactobacillus_crustorum(0.9500)		0	0	0	0	0	0	2	0	0	0	0	0	0	0	0	0	0	0	0	0	0	0	0	0	0	0	0	0	0	0	0	0	0	0	0	0	0	0	0	0	0	0	0
730	MH815894	p:Verrucomicrobia	f:Opitutaceae(0.7800)	g:Alterococcus(0.5200)	s:Alterococcus_agarolyticus(0.5200)		0	8	15	0	5	0	0	0	0	0	0	0	2	0	2	0	0	9	0	0	0	0	0	0	0	0	0	0	0	0	0	0	0	0	0	0	0	0	0	0	0	0	0
731	MH815895	p:Firmicutes	f:Paenibacillaceae(1.0000)	g:Paenibacillus(0.9900)	s:Paenibacillus_agarexedens(0.9900)		0	0	0	0	0	0	0	0	0	24	0	42	0	0	0	0	0	0	0	0	0	1	0	0	0	0	0	0	0	0	0	0	0	0	0	0	0	0	0	0	0	0	0
734	MH815896	p:Actinobacteria	f:Corynebacteriaceae(1.0000)	g:Corynebacterium(1.0000)	s:Corynebacterium_sundsvallense(0.8100)		0	0	0	0	0	0	0	0	0	0	0	0	0	0	0	0	0	0	0	0	2	0	0	0	0	0	0	0	0	0	0	0	1	0	0	0	0	0	0	0	0	0	0
735	MH815897	p:Proteobacteria	f:Ectothiorhodospiraceae(0.3500)	g:Alkalilimnicola(0.2600)	s:Alkalilimnicola_ehrlichii(0.2600)		0	0	0	0	0	0	0	0	0	0	0	0	0	0	0	0	28	0	0	0	0	0	0	0	0	0	0	0	0	0	0	0	0	0	0	0	0	0	0	0	0	0	0
736	MH815898	p:Bacteroidetes	f:Porphyromonadaceae(1.0000)	g:Paludibacter(1.0000)	s:Paludibacter_propionicigenes(1.0000)		0	0	0	0	0	0	0	0	0	0	0	26	0	0	0	0	0	0	0	0	0	0	0	0	0	0	0	0	0	0	0	0	0	0	0	0	0	0	0	0	0	0	0
737	MH815899	p:Bacteroidetes	f:Cytophagaceae(0.4400)	g:Runella(0.2000)	s:Runella_limosa(0.2000)		0	0	0	0	22	0	0	0	0	0	0	0	0	0	0	0	0	0	0	0	0	0	0	0	0	0	0	0	0	0	0	0	0	0	0	0	0	0	0	0	0	0	0
738	MH815900	p:Firmicutes	f:Clostridiaceae(0.4200)	g:Clostridium(0.3700)	s:Clostridium_methylpentosum(0.2300)		0	0	0	0	0	0	13	0	0	0	0	0	0	0	0	0	0	0	0	0	0	0	0	0	0	0	0	0	0	0	0	0	0	0	0	0	0	0	0	0	0	0	0
739	MH815901	p:Firmicutes	f:Streptococcaceae(1.0000)	g:Lactococcus(1.0000)	s:Lactococcus_lactis_subsp._cremoris(1.0000)	Firm-S	0	0	0	0	25	0	14	0	0	0	0	36	0	0	0	85	0	0	0	0	0	0	0	0	0	0	0	0	0	0	0	0	0	1	0	0	0	0	0	0	0	0	1
740	MH815902	p:Bacteroidetes	f:Rikenellaceae(1.0000)	g:Acetobacteroides(1.0000)	s:Acetobacteroides_hydrogenigenes(1.0000)		0	0	0	0	0	0	0	0	0	0	0	0	0	0	0	23	0	0	0	0	0	0	0	0	0	0	0	0	0	0	0	0	0	0	0	0	0	0	0	0	0	0	0
742	MH815903	p:Proteobacteria	f:Polyangiaceae(0.5400)	g:Chondromyces(0.3100)	s:Jahnella_thaxteri(0.1800)		0	0	0	0	0	0	0	0	0	0	0	0	0	0	0	30	0	0	0	0	0	0	0	0	0	0	0	0	0	0	0	0	0	0	0	0	0	0	0	0	0	0	0
744	MH815904	p:Bacteroidetes	f:Flavobacteriaceae(1.0000)	g:Flavobacterium(1.0000)	s:Flavobacterium_suzhouense(0.7000)		0	4	9	0	0	0	1	0	3	0	0	0	0	0	0	0	23	0	1	0	0	0	0	0	0	0	0	0	0	0	0	0	0	0	0	0	0	0	0	0	0	0	0
745	MH815905	p:Bacteroidetes	f:Chitinophagaceae(1.0000)	g:Sediminibacterium(1.0000)	s:Sediminibacterium_goheungense(0.9700)		0	0	1	0	0	0	1	1	0	51	0	0	0	5	0	0	23	0	0	0	0	0	0	0	0	0	0	0	0	30	0	0	0	0	0	0	0	0	0	0	0	0	0
748	MH815906	p:Bacteroidetes	f:Chitinophagaceae(1.0000)	g:Niabella(1.0000)	s:Niabella_tibetensis(0.4500)		0	0	0	0	0	0	10	0	0	0	0	0	0	0	0	0	0	0	0	0	0	0	0	0	0	0	0	0	0	0	0	0	0	0	0	0	0	0	0	0	0	0	0
749	MH815907	p:Proteobacteria	f:Helicobacteraceae(0.8600)	g:Sulfurimonas(0.8200)	s:Sulfurimonas_gotlandica(0.5700)		0	0	0	0	0	0	0	0	0	0	0	0	0	0	0	0	0	0	0	0	0	0	0	0	0	0	0	0	0	3	0	0	0	0	0	0	0	0	0	0	0	0	0
751	MH815908	p:Fusobacteria	f:Fusobacteriaceae(0.9500)	g:Fusobacterium(0.7000)	s:Fusobacterium_varium(0.2100)		0	0	0	0	0	0	0	0	0	0	0	0	0	0	0	0	0	0	0	0	0	0	0	0	0	0	0	0	0	0	0	0	0	0	0	0	20	0	0	0	0	0	0
753	MH815909	p:Proteobacteria	f:Xanthobacteraceae(1.0000)	g:Ancylobacter(1.0000)	s:Ancylobacter_polymorphus(0.9000)		0	0	5	0	0	0	0	0	0	0	0	0	0	0	0	0	0	0	0	0	0	0	0	0	0	0	0	0	0	0	0	0	0	0	0	0	0	0	0	0	0	0	0
754	MH815910	p:Chlamydiae	f:Parachlamydiaceae(0.9900)	g:Neochlamydia(0.5400)	s:Neochlamydia_hartmannellae(0.5400)		0	0	0	0	0	0	0	0	0	27	0	0	0	0	0	0	3	0	0	0	0	0	0	0	0	0	0	0	0	0	0	0	0	0	0	0	0	0	0	0	0	0	0
755	MH815911	p:Bacteroidetes	f:Flavobacteriaceae(1.0000)	g:Flavobacterium(1.0000)	s:Flavobacterium_aquidurense(0.7400)		0	0	0	0	21	0	0	0	0	0	0	0	0	0	0	0	0	0	0	0	0	0	0	0	0	0	0	0	0	0	0	0	0	0	0	0	0	0	0	0	0	0	0
756	MH815912	p:Planctomycetes	f:Planctomycetaceae(0.9700)	g:Blastopirellula(0.7600)	s:Blastopirellula_cremea(0.4800)		0	0	0	0	9	9	0	0	0	0	0	0	5	0	0	0	15	0	0	0	0	0	0	0	0	0	0	0	0	0	0	0	0	0	0	0	0	0	0	0	0	0	0
757	MH815913	p:Firmicutes	f:Bacillaceae(0.2600)	g:Caldalkalibacillus(0.1800)	s:Caldalkalibacillus_thermarum(0.1800)		0	0	0	0	0	0	0	0	4	0	0	29	0	0	0	0	0	0	0	0	0	0	0	0	0	0	0	0	0	0	0	0	0	0	0	0	0	0	0	0	0	0	0
758	MH815914	p:Planctomycetes	f:Planctomycetaceae(0.4500)	g:Planctopirus(0.1200)	s:Planctopirus_limnophila(0.1200)		0	0	0	0	0	0	0	0	0	0	0	0	0	0	0	28	0	0	0	0	0	0	0	0	0	0	0	0	0	0	0	0	0	0	0	0	0	0	0	0	0	0	0
759	MH815915	p:Firmicutes	f:Clostridiaceae(0.9200)	g:Clostridium(0.8000)	s:Clostridium_asparagiforme(0.6700)		0	0	0	0	0	0	4	0	0	0	0	0	0	0	0	0	0	0	0	0	0	0	0	0	0	0	0	0	0	0	0	0	0	0	0	0	0	0	0	0	0	0	0
760	MH815916	p:Proteobacteria	f:Lysobacteraceae(0.8400)	g:Chiayiivirga(0.7800)	s:Chiayiivirga_flava(0.7800)		0	0	0	0	0	4	0	0	7	32	0	0	0	0	0	0	14	0	2	0	0	0	0	0	0	0	0	0	0	0	0	0	0	0	0	0	0	0	0	0	0	0	0
763	MH815917	p:Proteobacteria	f:Lysobacteraceae(0.7600)	g:Stenotrophomonas(0.7400)	s:Stenotrophomonas_rhizophila(0.7100)		0	0	2	0	0	18	2	1	12	101	13	0	7	0	0	21	24	3	0	0	0	0	0	0	0	0	0	0	0	0	0	0	0	0	0	0	0	0	0	0	0	0	0
764	MH815918	p:Proteobacteria	f:Neisseriaceae(0.5000)	g:Burkholderia(0.2100)	s:Burkholderia_diffusa(0.1300)		0	0	0	0	0	0	12	0	0	0	0	0	0	0	0	0	0	0	0	0	0	0	0	0	0	0	0	0	0	0	0	0	0	0	0	0	0	0	0	0	0	0	0
765	MH815919	p:Proteobacteria	f:Legionellaceae(1.0000)	g:Legionella(1.0000)	s:Legionella_erythra(0.4400)		0	0	0	0	0	0	0	0	0	0	21	0	0	0	0	0	0	0	0	0	0	0	0	0	0	0	0	0	0	0	0	0	0	0	0	0	0	0	0	0	0	0	0
766	MH815920	p:Firmicutes	f:Clostridiaceae(0.9100)	g:Clostridium(0.9100)	s:Clostridium_colinum(0.7200)		0	0	0	0	0	0	3	0	0	0	0	0	0	0	0	0	0	0	0	0	0	0	0	0	0	0	0	0	0	0	0	0	0	0	0	0	0	0	0	0	0	0	0
767	MH815921	p:Spirochaetes	f:Leptospiraceae(0.1500)	g:Leptospira(0.1500)	s:Leptospira_biflexa(0.1200)		0	0	0	0	0	0	0	0	0	0	0	0	0	0	0	0	0	0	0	0	0	0	0	0	0	0	0	0	0	0	0	0	0	0	0	0	0	0	0	0	0	0	0
768	MH815922	p:Firmicutes	f:Lachnospiraceae(1.0000)	g:Lachnoanaerobaculum(1.0000)	s:Lachnoanaerobaculum_umeaense(0.8800)		0	0	0	0	21	0	1	0	0	0	0	0	0	0	0	0	0	0	0	0	0	0	0	0	0	0	0	0	0	0	0	0	0	0	0	0	0	0	0	0	0	0	0
770	MH815923	p:Gemmatimonadetes	f:Gemmatimonadaceae(0.2500)	g:Gemmatimonas(0.2500)	s:Gemmatimonas_aurantiaca(0.2500)		0	0	0	0	0	0	0	0	0	0	17	0	0	0	0	0	0	0	0	0	0	0	0	0	0	0	0	0	0	0	0	0	0	0	0	0	0	0	0	0	0	0	0
771	MH815924	p:Bacteroidetes	f:Porphyromonadaceae(1.0000)	g:Parabacteroides(0.9300)	s:Parabacteroides_chinchillae(0.7100)		0	0	0	0	0	0	18	0	0	0	0	0	0	0	0	0	0	0	0	0	0	0	0	0	0	0	0	0	0	0	0	0	0	0	0	0	0	0	0	0	0	0	0
772	MH815925	p:Firmicutes	f:Clostridiaceae(0.1700)	g:Clostridium(0.1500)	s:Exilispira_thermophila(0.0300)		0	0	0	0	0	0	0	0	0	0	0	0	0	0	0	17	0	0	0	0	0	0	0	0	0	0	0	0	0	0	0	0	0	0	0	0	0	0	0	0	0	0	0
773	MH815926	p:Proteobacteria	f:Bdellovibrionaceae(1.0000)	g:Bdellovibrio(1.0000)	s:Bdellovibrio_bacteriovorus(0.9600)		0	0	5	0	0	0	0	0	7	0	0	0	0	0	0	0	0	0	0	0	0	0	0	0	0	0	0	0	0	0	0	0	0	0	0	0	0	0	0	0	0	0	0
774	MH815927	p:Firmicutes	f:Clostridiaceae(0.1300)	g:Clostridium(0.0900)	s:Leptospira_biflexa(0.0600)		0	0	0	0	0	0	0	0	0	32	0	0	0	0	0	0	0	0	0	0	0	0	0	0	0	0	0	0	0	0	0	0	0	0	0	0	0	0	0	0	0	0	0
779	MH815928	p:Bacteroidetes	f:Marinilabiliaceae(0.7700)	g:Alkalitalea(0.5000)	s:Alkalitalea_saponilacus(0.5000)		0	0	0	0	0	0	7	0	0	0	0	0	0	0	0	0	0	0	0	0	0	0	0	0	0	0	0	0	0	0	0	0	0	0	0	0	0	0	0	0	0	0	0
781	MH815929	p:Bacteroidetes	f:Chitinophagaceae(1.0000)	g:Terrimonas(0.9900)	s:Terrimonas_lutea(0.6400)		2	11	38	0	1	11	2	0	2	0	24	34	12	1	0	104	0	0	0	0	0	0	0	0	0	0	0	0	0	0	0	0	0	0	0	0	0	0	0	0	0	0	0
782	MH815930	p:Verrucomicrobia	f:Opitutaceae(1.0000)	g:Opitutus(0.9800)	s:Opitutus_terrae(0.9800)		0	2	9	0	0	0	0	1	0	0	0	0	0	0	0	0	32	0	0	0	0	0	0	0	0	0	0	0	0	0	0	0	0	0	0	0	0	0	0	0	0	0	0
783	MH815931	p:Proteobacteria	f:Nevskiaceae(1.0000)	g:Nevskia(1.0000)	s:Nevskia_persephonica(0.5300)		0	2	9	0	0	0	0	0	0	0	0	0	7	0	0	0	0	0	0	0	0	0	0	0	0	0	0	0	0	0	0	0	0	0	0	0	0	0	0	0	0	0	0
785	MH815932	p:Bacteroidetes	f:Flavobacteriaceae(1.0000)	g:Psychroflexus(1.0000)	s:Psychroflexus_halocasei(1.0000)		0	0	0	0	32	0	0	0	0	0	0	0	0	0	0	0	0	0	0	0	0	0	0	0	0	0	0	0	0	0	0	0	0	0	0	0	0	0	0	0	0	0	0
786	MH815933	p:Actinobacteria	f:Bifidobacteriaceae(1.0000)	g:Bifidobacterium(1.0000)	s:Bifidobacterium_actinocoloniiforme(1.0000)	Bifido-1	0	0	0	0	0	0	0	26	0	0	0	0	0	0	0	0	0	0	0	0	0	0	0	0	0	0	0	0	0	0	0	0	0	0	0	0	0	0	0	0	0	0	0
787	MH815934	p:Proteobacteria	f:Comamonadaceae(0.9900)	g:Comamonas(0.9200)	s:Comamonas_composti(0.4800)		0	31	126	0	0	1	3	0	0	0	0	0	0	0	8	19	10	1	0	1	2	0	0	0	0	0	0	0	0	0	0	0	0	0	0	1	0	0	0	0	0	0	0
788	MH815935	p:Bacteroidetes	f:Sphingobacteriaceae(1.0000)	g:Sphingobacterium(1.0000)	s:Sphingobacterium_caeni(0.3100)		0	4	10	0	0	0	5	0	0	0	35	0	0	0	0	0	5	0	0	0	0	0	0	0	0	0	0	0	0	0	0	0	0	0	0	0	0	0	0	0	0	0	0
789	MH815936	p:Actinobacteria	f:Thermomonosporaceae(0.9900)	g:Actinoallomurus(0.9400)	s:Actinoallomurus_acanthiterrae(0.3300)		0	0	0	0	0	0	5	0	0	0	0	0	0	0	0	0	0	0	0	0	0	0	0	0	0	0	0	0	0	0	0	0	0	0	0	0	0	0	0	0	0	0	0
790	MH815937	p:Firmicutes	f:Clostridiaceae(1.0000)	g:Clostridium(1.0000)	s:Clostridium_lactatifermentans(1.0000)		0	0	0	0	0	0	2	0	0	0	0	0	0	0	0	0	0	0	0	0	0	0	0	0	0	0	0	0	0	0	0	0	0	0	0	0	0	0	0	0	0	0	0
791	MH815938	p:Firmicutes	f:Clostridiaceae(0.3300)	g:Clostridium(0.2900)	s:Clostridium_lactatifermentans(0.1200)		0	0	0	0	0	0	5	0	0	0	0	0	0	0	0	0	0	0	0	0	0	0	0	0	0	0	0	0	0	0	0	0	0	0	0	0	0	0	0	0	0	0	0
792	MH815939	p:Actinobacteria	f:Nocardioidaceae(1.0000)	g:Aeromicrobium(1.0000)	s:Aeromicrobium_erythreum(0.9600)		0	0	0	0	2	14	0	0	0	0	0	0	0	0	10	0	0	0	0	1	0	0	0	0	0	0	0	0	0	0	0	0	0	0	0	0	0	0	0	0	0	0	0
793	MH815940	p:Actinobacteria	f:Acidimicrobiaceae(0.8300)	g:Ilumatobacter(0.8300)	s:Ilumatobacter_fluminis(0.4300)		0	0	0	0	0	0	0	0	0	0	0	0	0	0	0	0	25	0	0	0	0	0	0	0	0	0	0	0	0	0	0	0	0	0	0	0	0	0	1	0	0	0	0
797	MH815941	p:Bacteroidetes	f:Prevotellaceae(1.0000)	g:Prevotella(1.0000)	s:Prevotella_paludivivens(1.0000)		0	0	0	0	0	0	5	0	0	0	0	0	0	0	0	0	0	0	0	0	0	0	0	0	0	0	0	0	0	0	0	0	0	0	0	0	0	0	0	0	0	0	0
798	MH815942	p:Bacteroidetes	f:Rikenellaceae(0.9400)	g:Alistipes(0.7900)	s:Alistipes_onderdonkii(0.3800)		0	0	0	0	0	0	16	0	0	0	0	0	0	0	0	29	0	0	0	0	0	0	0	0	0	0	0	0	0	0	0	0	0	0	0	0	0	0	0	0	0	0	0
799	MH815943	p:Actinobacteria	f:Acidimicrobiaceae(0.5600)	g:Ilumatobacter(0.5600)	s:Ilumatobacter_fluminis(0.5000)		0	0	0	0	0	0	0	0	0	0	0	0	0	0	0	0	26	0	0	0	0	0	0	0	0	0	0	0	0	0	0	0	0	0	0	0	0	0	0	0	0	0	0
800	MH815944	p:Bacteroidetes	f:Chitinophagaceae(1.0000)	g:Asinibacterium(0.9900)	s:Asinibacterium_lactis(0.9900)		0	0	0	0	0	0	1	0	3	0	0	0	0	0	0	0	0	0	0	0	0	0	0	0	0	0	0	0	0	0	0	0	0	0	0	0	0	0	0	0	0	0	0
801	MH815945	p:Proteobacteria	f:Brucellaceae(0.7600)	g:Pseudochrobactrum(0.7500)	s:Pseudochrobactrum_asaccharolyticum(0.7500)		1	61	257	0	27	3	5	0	10	0	10	60	6	6	1	44	37	0	0	0	1	0	0	1	0	0	0	0	0	0	0	0	0	0	0	0	16	0	0	0	0	0	0
803	MH815946	p:Firmicutes	f:Enterococcaceae(0.9300)	g:Enterococcus(0.9200)	s:Enterococcus_canintestini(0.3100)		0	0	0	0	2	1	21	0	0	0	0	17	0	2	0	0	0	0	0	0	0	1	0	0	0	0	0	0	0	0	0	0	0	0	0	0	0	0	0	0	0	0	0
804	MH815947	p:Verrucomicrobia	f:Opitutaceae(0.7700)	g:Opitutus(0.6800)	s:Opitutus_terrae(0.6800)		0	0	0	0	8	8	0	0	0	0	0	0	0	0	0	0	0	0	0	0	0	0	0	0	0	0	0	0	0	0	0	0	0	0	0	0	0	0	0	0	0	0	0
806	MH815948	p:Proteobacteria	f:Hyphomonadaceae(0.1000)	g:Alicyclobacillus(0.1000)	s:Altererythrobacter_namhicola(0.1000)		0	0	0	0	0	0	0	0	0	22	0	0	0	0	0	0	0	0	0	0	0	0	0	0	0	0	0	0	0	0	0	0	0	0	0	0	0	0	0	0	0	0	0
807	MH815949	p:Actinobacteria	f:Micromonosporaceae(0.7800)	g:Actinoplanes(0.5700)	s:Actinoplanes_durhamensis(0.1700)		0	0	0	0	0	0	0	0	0	0	0	0	0	0	0	0	20	0	0	0	0	0	0	0	0	0	0	0	0	0	0	0	0	0	0	0	0	0	0	0	0	0	0
808	MH815950	p:Bacteroidetes	f:Flammeovirgaceae(0.6600)	g:Fulvivirga(0.5000)	s:Fulvivirga_kasyanovii(0.4800)		0	1	1	0	0	0	0	0	0	0	0	0	0	0	0	0	0	0	0	0	0	0	0	0	0	0	0	0	0	14	0	0	0	0	0	0	0	0	0	0	0	0	0
809	MH815951	p:Firmicutes	f:Ruminococcaceae(0.7300)	g:Anaerotruncus(0.6400)	s:Anaerotruncus_colihominis(0.6400)		0	0	0	0	0	0	6	0	0	0	0	0	0	0	0	0	0	0	0	0	0	0	0	0	0	0	0	0	0	0	0	0	0	0	0	0	0	0	0	0	0	0	0
810	MH815952	p:Proteobacteria	f:Coxiellaceae(0.9900)	g:Aquicella(0.9900)	s:Aquicella_siphonis(0.9800)		0	0	0	0	0	0	0	0	0	0	41	0	0	0	0	0	0	0	0	0	0	0	0	0	0	0	0	0	0	0	0	0	0	0	0	0	0	0	0	0	0	0	0
812	MH815953	p:Proteobacteria	f:Desulfobacteraceae(0.3100)	g:Desulfosarcina(0.1900)	s:Desulfosarcina_cetonica(0.1900)		0	1	3	0	0	3	0	0	0	0	0	4	0	0	0	0	16	0	0	0	0	0	0	0	0	0	0	0	0	0	0	0	0	0	0	0	0	0	0	0	0	0	0
813	MH815954	p:Proteobacteria	f:Sulfuricellaceae(1.0000)	g:Sulfuriferula(1.0000)	s:Sulfuriferula_plumbophilus(0.6500)		0	0	0	0	0	0	6	0	0	0	0	0	0	0	0	0	0	0	0	0	0	0	0	0	0	0	0	0	0	0	0	0	0	0	0	0	0	0	0	0	0	0	0
814	MH815955	p:Proteobacteria	f:Alcaligenaceae(0.9900)	g:Castellaniella(0.7000)	s:Castellaniella_caeni(0.7000)		0	0	0	0	0	0	0	0	0	24	0	0	0	0	0	0	0	0	0	0	0	0	0	0	0	0	0	0	0	0	0	0	0	0	0	0	0	0	0	0	0	0	0
815	MH815956	p:Acidobacteria	f:Acidobacteriaceae(1.0000)	g:Granulicella(0.9700)	s:Granulicella_mallensis(0.9200)		0	0	0	0	0	0	6	0	0	0	0	0	0	0	0	0	0	0	0	0	0	0	0	0	0	0	0	0	0	0	0	0	0	0	0	0	0	0	0	0	0	0	0
816	MH815957	p:Proteobacteria	f:Rhodocyclaceae(0.5300)	g:Ferriphaselus(0.4100)	s:Ferriphaselus_amnicola(0.4100)		0	0	0	0	0	0	0	0	0	0	0	0	0	0	0	0	0	0	0	0	0	0	0	0	0	0	0	0	0	8	0	0	0	0	0	0	0	0	4	0	0	0	0
817	MH815958	p:Proteobacteria	f:Sphingomonadaceae(0.8500)	g:Sandaracinobacter(0.3800)	s:Sandaracinobacter_sibiricus(0.3800)		0	0	0	0	0	0	0	0	0	0	0	0	2	0	0	0	0	0	0	0	0	0	0	0	0	0	0	0	0	0	0	0	0	0	0	0	0	0	0	0	0	0	0
819	MH815959	p:Firmicutes	f:Erysipelotrichaceae(0.9200)	g:Holdemania(0.9200)	s:Holdemania_filiformis(0.9200)		0	0	0	0	0	0	4	0	0	0	0	0	0	0	0	0	0	0	0	0	0	0	0	0	0	0	0	0	0	0	0	0	0	0	0	0	0	0	0	0	0	0	0
820	MH815960	p:Proteobacteria	f:Rhodospirillaceae(0.1900)	g:Desulfovibrio(0.0800)	s:Magnetovibrio_blakemorei(0.0700)		0	0	0	0	24	0	0	0	0	0	0	0	0	0	0	0	0	0	0	0	0	0	0	0	0	0	0	0	0	0	0	0	0	0	0	0	0	0	0	0	0	0	0
821	MH815961	p:Firmicutes	f:Unclassified_Clostridiales(0.1000)	g:Geobacter(0.1000)	s:Orientia_tsutsugamushi(0.0700)		0	0	0	0	27	0	0	0	0	0	0	0	0	0	0	0	0	0	0	0	0	0	0	0	0	0	0	0	0	0	0	0	0	0	0	0	0	0	0	0	0	0	0
822	MH815962	p:Proteobacteria	f:Rhodospirillaceae(0.2900)	g:Azospirillum(0.1500)	s:Azospirillum_irakense(0.0800)		0	0	0	0	0	0	0	0	0	0	0	0	0	0	0	0	0	0	0	0	0	0	0	0	0	0	0	0	0	3	0	0	0	0	0	0	0	0	0	0	0	0	0
823	MH815963	p:Proteobacteria	f:Caulobacteraceae(1.0000)	g:Asticcacaulis(0.8800)	s:Asticcacaulis_benevestitus(0.6300)		0	0	0	0	0	0	0	0	0	0	0	0	0	0	0	0	0	0	0	0	0	0	0	0	0	0	0	0	0	0	0	0	0	0	0	0	0	0	0	0	0	0	0
824	MH815964	p:Bacteroidetes	f:Porphyromonadaceae(1.0000)	g:Porphyromonas(1.0000)	s:Porphyromonas_catoniae(1.0000)		0	0	0	0	6	0	1	0	0	0	0	0	0	0	0	0	0	5	0	0	0	0	0	0	0	0	0	0	0	0	0	0	0	0	0	0	3	0	0	0	0	0	0
825	MH815965	p:Proteobacteria	f:Sneathiellaceae(1.0000)	g:Taonella(1.0000)	s:Taonella_mepensis(1.0000)		0	0	1	0	0	0	0	0	0	29	0	0	0	4	0	0	11	0	0	0	0	0	0	0	0	0	0	0	0	0	0	0	0	0	0	0	0	0	0	0	0	0	0
826	MH815966	p:Proteobacteria	f:Methylophilaceae(0.6600)	g:Methylophilus(0.3200)	s:Methylophilus_methylotrophus(0.2600)		0	0	0	0	0	0	3	0	0	0	0	0	0	0	0	0	0	0	0	0	0	0	0	0	0	0	0	0	0	0	0	0	0	0	0	0	0	0	0	0	0	0	0
828	MH815967	p:Actinobacteria	f:Acidomicrobiaceae(0.5400)	g:Aciditerrimonas(0.5400)	s:Aciditerrimonas_ferrireducens(0.5400)		0	0	0	0	0	0	10	0	0	0	0	0	0	0	0	0	0	0	0	0	0	0	0	0	0	0	0	0	0	0	0	0	0	0	0	0	0	0	0	0	0	0	0
829	MH815968	p:Proteobacteria	f:Desulfobacteraceae(0.2300)	g:Desulfatitalea(0.0900)	s:Desulfatitalea_tepidiphila(0.0900)		0	0	0	0	0	0	0	0	0	0	0	0	0	0	0	18	0	0	0	0	0	0	0	0	0	0	0	0	0	0	0	0	0	0	0	0	0	0	0	0	0	0	0
830	MH815969	p:Firmicutes	f:Lachnospiraceae(1.0000)	g:Oribacterium(1.0000)	s:Oribacterium_sinus(0.9100)		0	0	0	0	6	0	1	0	0	0	0	0	0	0	0	0	0	0	0	0	0	0	0	0	0	0	0	0	0	0	0	0	0	0	0	0	0	0	0	0	0	0	0
834	MH815970	p:Acidobacteria	f:Acidobacteriaceae(1.0000)	g:Terriglobus(0.4800)	s:Terriglobus_saanensis(0.3900)		0	0	0	0	0	7	3	0	0	0	0	0	0	0	0	0	0	0	0	0	0	0	0	0	0	0	0	0	0	0	0	0	0	0	0	0	0	0	0	0	0	0	0
835	MH815971	p:Firmicutes	f:Thermoanaerobacteraceae(0.4200)	g:Carboxydothermus(0.2900)	s:Carboxydothermus_pertinax(0.1600)		0	0	0	0	0	0	0	0	0	0	0	0	0	0	0	0	21	0	0	0	0	0	0	0	0	0	0	0	0	0	0	0	0	0	0	0	0	0	0	0	0	0	0
836	MH815972	p:Firmicutes	f:Clostridiaceae(0.4000)	g:Blautia(0.2400)	s:Lactonifactor_longoviformis(0.2400)		0	0	0	0	0	0	8	0	0	0	0	0	0	0	0	0	0	0	0	0	0	0	0	0	0	0	0	0	0	0	0	0	0	0	0	0	0	0	0	0	0	0	0
837	MH815973	p:Bacteroidetes	f:Sphingobacteriaceae(1.0000)	g:Pedobacter(0.9900)	s:Pedobacter_nutrimenti(0.5600)		0	1	4	0	24	14	10	0	0	0	14	0	7	0	2	0	19	0	0	0	0	0	0	0	0	0	0	0	0	0	0	0	0	0	0	0	0	0	0	0	0	0	0
838	MH815974	p:Firmicutes	f:Unclassified_Clostridiales(1.0000)	g:Anaerovorax(0.9900)	s:Anaerovorax_odorimutans(0.9900)		0	0	0	0	0	0	4	0	0	0	0	0	0	0	0	0	0	0	0	0	0	0	0	0	0	0	0	0	0	0	0	0	0	0	0	0	0	0	0	0	0	0	0
839	MH815975	p:Firmicutes	f:Streptococcaceae(1.0000)	g:Lactococcus(1.0000)	s:Lactococcus_chungangensis(1.0000)		0	0	0	0	0	0	1	0	7	0	0	0	0	0	0	0	0	3	0	0	0	0	2	0	0	0	0	0	0	0	0	0	0	0	0	0	0	0	0	0	0	0	0
840	MH815976	p:Bacteroidetes	f:Unclassified_Cytophagales(0.6500)	g:Chryseolinea(0.5900)	s:Chryseolinea_serpens(0.5900)		0	0	0	0	0	0	0	0	0	0	0	0	0	0	0	0	20	0	0	0	0	0	0	0	0	0	0	0	0	0	0	0	0	0	0	0	0	0	0	0	0	0	0
841	MH815977	p:Bacteroidetes	f:Chitinophagaceae(1.0000)	g:Taibaiella(1.0000)	s:Taibaiella_koreensis(0.3700)		0	0	0	0	25	0	0	0	0	0	0	0	0	0	0	0	0	0	0	0	0	0	0	0	0	0	0	0	0	0	0	0	0	0	0	0	0	0	0	0	0	0	0
843	MH815978	p:Firmicutes	f:Ruminococcaceae(0.8900)	g:Anaerotruncus(0.3700)	s:Anaerotruncus_colihominis(0.3700)		0	0	0	0	0	0	7	0	0	0	0	0	0	0	0	0	0	0	0	0	0	0	0	0	0	0	0	0	0	0	0	0	0	0	0	0	0	0	0	0	0	0	0
846	MH815979	p:Proteobacteria	f:Syntrophobacteraceae(0.1800)	g:Desulfosoma(0.1700)	s:Desulfosoma_profundi(0.1700)		0	0	0	0	0	16	0	0	0	0	0	0	0	0	0	0	0	0	0	0	0	0	0	0	0	0	0	0	0	0	0	0	0	0	0	0	0	0	0	0	0	0	0
847	MH815980	p:Proteobacteria	f:Halomonadaceae(1.0000)	g:Halomonas(0.9900)	s:Halomonas_campaniensis(0.3500)		0	0	0	0	34	0	0	0	0	0	2	0	0	0	0	0	0	0	0	0	0	0	0	0	0	0	0	0	0	0	0	0	0	0	0	1	0	0	0	1	0	0	0
849	MH815981	p:Bacteroidetes	f:Flavobacteriaceae(1.0000)	g:Chryseobacterium(1.0000)	s:Chryseobacterium_hispanicum(0.9900)		0	0	0	0	0	19	0	0	0	0	0	89	0	0	0	0	0	0	0	0	0	0	0	0	0	0	0	0	0	0	0	0	0	0	0	0	0	0	0	0	0	0	0
851	MH815982	p:Proteobacteria	f:Oceanospirillaceae(1.0000)	g:Marinomonas(1.0000)	s:Marinomonas_arctica(0.8400)		0	0	0	0	0	0	0	0	0	0	0	0	0	0	0	0	0	0	0	0	0	0	0	0	0	0	1	0	0	0	0	0	0	0	0	1	0	0	0	0	0	0	0
852	MH815983	p:Firmicutes	f:Unclassified_Clostridiales(0.4800)	g:Tissierella(0.4100)	s:Tissierella_creatinophila(0.2200)		0	0	0	0	18	0	0	0	0	0	0	0	0	0	0	0	0	0	0	0	0	0	0	0	0	0	0	0	0	0	0	0	0	0	0	0	0	0	0	0	0	0	0
853	MH815984	p:Planctomycetes	f:Planctomycetaceae(0.1200)	g:Tepidisphaera(0.0900)	s:Tepidisphaera_mucosa(0.0900)		0	0	0	0	0	0	0	0	0	28	0	0	0	0	0	0	0	0	0	0	0	0	0	0	0	0	0	0	0	0	0	0	0	0	0	0	0	0	0	0	0	0	0
854	MH815985	p:Tenericutes	f:Mycoplasmataceae(0.4700)	g:Mycoplasma(0.4700)	s:Mycoplasma_alligatoris(0.1800)		0	0	0	0	0	0	0	0	0	0	0	0	0	0	0	23	0	0	0	0	0	0	0	0	0	0	0	0	0	0	0	0	0	0	0	0	0	0	0	0	0	0	0
856	MH815986	p:Firmicutes	f:Unclassified_Clostridiales(0.0900)	g:Bacteroides(0.0600)	s:Borrelia_coriaceae(0.0400)		0	0	0	0	0	0	0	0	0	0	0	0	0	0	0	0	0	0	0	0	0	0	0	0	0	0	0	0	0	3	0	0	0	0	0	0	0	0	0	0	0	0	0
858	MH815987	p:Bacteroidetes	f:Flavobacteriaceae(0.8500)	g:Chryseobacterium(0.3200)	s:Spongiimonas_flava(0.1700)		0	0	0	0	0	0	0	0	0	0	0	0	0	0	0	0	0	0	0	0	0	0	0	0	0	0	0	0	0	10	0	0	0	0	0	0	0	0	0	0	0	0	0
859	MH815988	p:Proteobacteria	f:Oligoflexaceae(1.0000)	g:Oligoflexus(1.0000)	s:Oligoflexus_tunisiensis(1.0000)		0	2	1	0	0	0	0	0	0	0	19	0	7	0	0	0	22	0	0	0	0	0	0	0	0	0	0	0	0	0	0	0	0	0	0	0	0	0	0	0	0	0	0
860	MH815989	p:Proteobacteria	f:Pseudomonadaceae(0.1900)	g:Coxiella(0.1400)	s:Coxiella_burnetii(0.1400)		0	0	1	0	0	10	0	0	0	0	0	0	0	0	0	0	5	0	0	0	0	0	1	0	0	0	0	0	0	0	0	0	0	0	0	0	0	0	0	0	0	0	0
861	MH815990	p:Planctomycetes	f:Planctomycetaceae(0.7700)	g:Blastopirellula(0.1900)	s:Blastopirellula_cremea(0.1800)		0	0	0	0	0	0	0	0	0	25	0	0	0	0	0	0	0	0	0	0	0	0	0	0	0	0	0	0	0	0	0	0	0	0	0	0	0	0	0	0	0	0	0
862	MH815991	p:Proteobacteria	f:Sphingomonadaceae(0.2100)	g:Sphingomonas(0.2000)	s:Sphingomonas_aestuarii(0.1700)		0	0	0	0	0	0	0	0	0	22	0	0	0	0	0	0	0	0	0	0	0	0	0	0	0	0	0	0	0	0	0	0	0	0	0	0	0	0	0	0	0	0	0
863	MH815992	p:Proteobacteria	f:Pseudomonadaceae(1.0000)	g:Cellvibrio(1.0000)	s:Cellvibrio_fibrivorans(0.4900)		1	24	103	0	36	12	0	0	8	52	12	0	10	3	3	31	43	4	0	0	1	0	0	0	0	0	0	0	0	0	0	0	0	0	0	0	0	0	0	0	0	0	0
865	MH815993	p:Bacteroidetes	f:Sphingobacteriaceae(0.4400)	g:Solitalea(0.2300)	s:Solitalea_canadensis(0.2000)		0	1	2	0	0	0	0	0	0	0	0	0	0	0	0	16	0	0	0	0	0	0	0	0	0	0	0	0	0	0	0	0	0	0	0	0	0	0	0	0	0	0	0
866	MH815994	p:Verrucomicrobia	f:Unclassified_Spartobacteria(0.8300)	g:Limisphaera(0.8300)	s:Limisphaera_ngatamarikiensis(0.8300)		0	0	0	0	0	0	0	0	0	0	17	0	7	0	0	0	0	0	0	0	0	0	0	0	0	0	0	0	0	0	0	0	0	0	0	0	0	0	0	0	0	0	0
867	MH815995	p:Proteobacteria	f:Rhodospirillaceae(0.4600)	g:Constrictibacter(0.1400)	s:Constrictibacter_antarcticus(0.1400)		0	0	0	0	0	0	0	0	0	0	17	0	0	0	0	0	0	0	0	0	0	0	0	0	0	0	0	0	0	0	0	0	0	0	0	0	0	0	0	0	0	0	0
868	MH815996	p:Verrucomicrobia	f:Unclassified_Spartobacteria(0.7900)	g:Limisphaera(0.7900)	s:Limisphaera_ngatamarikiensis(0.7900)		0	0	0	0	0	0	0	2	5	9	17	0	0	0	0	0	0	0	0	0	0	0	0	0	0	0	0	0	0	0	0	0	0	0	0	0	0	0	0	0	0	0	0
869	MH815997	p:Firmicutes	f:Ruminococcaceae(0.5700)	g:Clostridium(0.3700)	s:Anaerotruncus_colihominis(0.3100)		0	0	0	0	0	0	12	0	0	0	0	0	0	0	0	0	0	0	0	0	0	0	0	0	0	0	0	0	0	0	0	0	0	0	0	0	0	0	0	0	0	0	0
871	MH815998	p:Proteobacteria	f:Rhodospirillaceae(0.1000)	g:Acetobacter(0.0700)	s:Acetobacter_aceti(0.0700)		0	0	0	0	0	0	1	0	1	0	0	0	6	0	0	0	12	0	0	0	0	0	0	0	0	0	0	0	0	0	0	0	0	0	0	0	0	0	0	0	0	0	0
872	MH815999	p:Proteobacteria	f:Alteromonadaceae(0.2800)	g:Marinobacterium(0.2300)	s:Marinobacterium_coralli(0.1800)		0	3	18	0	0	0	0	0	0	0	0	0	0	0	0	0	0	0	0	0	0	0	0	0	0	0	0	0	0	0	0	0	0	0	0	0	0	0	0	0	0	0	0
873	MH816000	p:Firmicutes	f:Staphylococcaceae(1.0000)	g:Salinicoccus(0.9600)	s:Salinicoccus_alkaliphilus(0.5300)		0	0	0	0	0	0	11	0	0	0	31	56	0	0	0	0	0	0	0	147	164	62	110	14	160	17	2	0	0	0	3	0	0	0	0	0	0	0	0	0	0	0	0
874	MH816001	p:Bacteroidetes	f:Rikenellaceae(0.9000)	g:Alistipes(0.8000)	s:Alistipes_finegoldii(0.5900)		0	0	0	0	0	0	3	0	0	0	0	0	0	0	0	0	0	0	0	0	0	0	0	0	0	0	0	0	0	0	0	0	0	0	0	0	0	0	0	0	0	0	0
876	MH816002	p:Planctomycetes	f:Planctomycetaceae(1.0000)	g:Schlesneria(0.7800)	s:Schlesneria_paludicola(0.7800)		0	0	2	0	0	6	0	0	0	0	0	0	0	0	0	0	0	0	0	0	0	0	0	0	0	0	0	0	0	0	0	0	0	0	0	0	0	0	0	0	0	0	0
877	MH816003	p:Verrucomicrobia	f:Opitutaceae(0.9300)	g:Opitutus(0.8900)	s:Opitutus_terrae(0.8900)		0	0	1	0	0	7	1	0	0	0	0	0	8	0	5	0	41	0	0	0	0	0	0	0	0	0	0	0	0	0	0	0	0	0	0	0	0	0	0	0	0	0	0
878	MH816004	p:Actinobacteria	f:Microbacteriaceae(0.9300)	g:Leucobacter(0.6200)	s:Leucobacter_chromiireducens_subsp._chromiireducens(0.3200)		0	0	0	0	0	0	0	0	0	0	0	0	0	0	0	0	17	0	0	0	0	0	0	0	0	0	0	0	0	0	0	0	0	0	0	0	0	0	0	0	0	0	0
879	MH816005	p:Chloroflexi	f:Chloroflexaceae(0.5200)	g:Chloroflexus(0.5200)	s:Chloroflexus_aggregans(0.4800)		0	0	0	0	20	0	0	0	0	0	0	0	0	0	0	0	0	0	0	0	0	0	0	0	0	0	0	0	0	0	0	0	0	0	0	0	0	0	0	0	0	0	0
880	MH816006	p:Proteobacteria	f:Rhizobiaceae(0.4700)	g:Rhizobium(0.4700)	s:Rhizobium_borbori(0.2200)		0	26	82	0	25	2	1	0	11	3	24	49	0	0	1	15	18	4	0	0	0	0	0	0	0	0	0	0	0	1	1	1	0	0	0	0	0	0	0	0	0	0	0
881	MH816007	p:Deinococcus-Thermus	f:Deinococcaceae(1.0000)	g:Deinococcus(1.0000)	s:Deinococcus_antarcticus(0.4500)		0	0	0	0	0	15	0	0	0	0	0	0	0	0	0	0	0	0	0	0	0	0	0	0	0	0	0	0	0	0	0	0	0	0	0	0	0	0	0	0	0	0	0
883	MH816008	p:Proteobacteria	f:Rhodobacteraceae(0.1800)	g:Arthrobacter(0.0800)	s:Arthrobacter_viscosus(0.0800)		0	0	0	0	0	0	0	0	0	0	0	0	4	0	0	0	0	8	0	0	0	0	0	0	0	0	0	0	0	0	0	0	0	0	0	0	0	0	0	0	0	0	0
884	MH816009	p:Proteobacteria	f:Rhodospirillaceae(0.1300)	g:Cucumibacter(0.0500)	s:Cucumibacter_marinus(0.0500)		0	0	0	0	15	0	0	0	0	0	0	0	0	0	0	0	13	0	0	0	0	0	0	0	0	0	0	0	0	0	0	0	0	0	0	0	0	0	0	0	0	0	0
885	MH816010	p:Proteobacteria	f:Campylobacteraceae(1.0000)	g:Campylobacter(1.0000)	s:Campylobacter_ureolyticus(1.0000)		0	0	0	0	17	0	3	0	0	0	0	0	0	0	0	0	0	0	0	0	0	0	0	0	0	0	0	0	0	0	0	0	0	0	0	0	0	0	0	0	0	0	0
886	MH816011	p:Chloroflexi	f:Sphaerobacteraceae(0.8700)	g:Nitrolancea(0.7800)	s:Nitrolancea_hollandica(0.7800)		0	0	0	0	20	0	0	0	0	0	0	0	0	0	0	0	0	3	0	0	0	0	0	0	0	0	0	0	0	0	0	0	0	0	0	0	0	0	0	0	0	0	0
887	MH816012	p:Proteobacteria	f:Burkholderiaceae(1.0000)	g:Polynucleobacter(0.9900)	s:Polynucleobacter_acidiphobus(0.9900)		0	0	0	0	13	0	0	0	2	0	0	0	0	0	0	0	0	0	0	0	0	0	0	0	0	0	0	0	0	0	0	0	0	0	0	0	0	0	1	0	0	0	0
889	MH816013	p:Actinobacteria	f:Thermomonosporaceae(0.1000)	g:Rubrobacter(0.1000)	s:Rubrobacter_bracarensis(0.0800)		0	0	0	0	0	0	0	0	0	0	0	0	0	0	0	0	16	0	0	0	0	0	0	0	0	0	0	0	0	0	0	0	0	0	0	0	0	0	0	0	0	0	0
890	MH816014	p:Firmicutes	f:Paenibacillaceae(1.0000)	g:Paenibacillus(1.0000)	s:Paenibacillus_aestuarii(0.4200)		0	0	0	0	0	0	0	0	2	0	0	0	0	0	0	0	0	3	0	0	0	0	0	0	0	0	0	0	0	0	0	0	0	0	0	0	0	0	0	0	0	0	0
891	MH816015	p:Proteobacteria	f:Lysobacteraceae(1.0000)	g:Lysobacter(0.8800)	s:Lysobacter_mobilis(0.4600)		0	0	0	0	0	0	0	0	0	0	0	0	0	0	0	0	22	0	0	0	0	0	0	0	0	0	0	0	0	0	0	0	0	0	0	0	0	0	0	0	0	0	0
892	MH816016	p:Proteobacteria	f:Rhodospirillaceae(0.2700)	g:Geminicoccus(0.2100)	s:Geminicoccus_roseus(0.2100)		0	0	0	0	0	13	0	0	0	0	0	0	0	0	0	0	0	0	0	0	0	0	0	0	0	0	0	0	0	0	0	0	0	0	0	0	0	0	0	0	0	0	0
894	MH816017	p:Proteobacteria	f:Micropepsaceae	g:Rhizomicrobium(0.5300)	s:Rhizomicrobium_electricum(0.4700)		0	0	2	0	0	0	0	0	0	0	0	0	0	0	0	0	0	0	0	0	0	0	0	0	0	0	0	0	0	0	0	0	0	0	0	0	0	0	0	0	0	0	0
895	MH816018	p:Proteobacteria	f:Hydrogenophilaceae(1.0000)	g:Hydrogenophilus(1.0000)	s:Hydrogenophilus_hirschii(1.0000)		0	0	0	0	0	0	4	0	0	0	0	0	0	0	0	0	0	0	0	0	0	0	0	0	0	0	0	0	0	1	0	0	0	0	0	0	0	0	0	0	0	0	0
896	MH816019	p:Actinobacteria	f:Actinomycetaceae(1.0000)	g:Mobiluncus(1.0000)	s:Mobiluncus_curtisii_subsp._curtisii(1.0000)		0	0	0	0	0	0	0	0	0	0	0	0	0	0	0	0	0	0	0	0	0	0	0	0	0	0	0	0	0	0	0	0	0	0	0	0	0	0	0	0	0	0	0
897	MH816020	p:Bacteroidetes	f:Chitinophagaceae(0.9200)	g:Chitinophaga(0.2400)	s:Sediminibacterium_ginsengisoli(0.1600)		0	5	8	0	0	14	0	0	0	0	0	0	0	0	0	0	0	4	0	0	1	0	0	0	0	0	0	0	0	0	0	0	0	0	0	0	0	0	0	0	0	0	0
898	MH816021	p:Firmicutes	f:Clostridiaceae(0.1200)	g:Clostridium(0.1100)	s:Acholeplasma_hippikon(0.0400)		0	0	0	0	0	0	0	0	0	0	16	0	0	0	0	0	0	0	0	0	0	0	0	0	0	0	0	0	0	0	0	0	0	0	0	0	0	0	0	0	0	0	0
900	MH816022	p:Bacteroidetes	f:Rikenellaceae(0.9700)	g:Alistipes(0.9700)	s:Alistipes_finegoldii(0.7500)		0	0	0	0	0	0	10	0	0	0	0	0	0	0	0	0	0	0	0	0	0	0	0	0	0	0	0	0	0	0	0	0	0	0	0	0	0	0	0	0	0	0	0
901	MH816023	p:Proteobacteria	f:Moraxellaceae(1.0000)	g:Psychrobacter(0.9900)	s:Psychrobacter_celer(0.5000)		0	0	0	0	0	4	0	0	0	0	12	0	0	0	0	0	0	0	0	0	0	1	0	0	2	0	0	0	0	0	0	0	0	0	0	0	0	0	1	0	0	2	0
902	MH816024	p:Verrucomicrobia	f:Unclassified_Spartobacteria(0.9400)	g:Limisphaera(0.9400)	s:Limisphaera_ngatamarikiensis(0.9400)		0	0	0	0	0	5	0	0	0	0	14	0	2	0	0	0	12	6	0	0	0	0	0	0	0	0	0	0	0	0	0	0	0	0	0	0	0	0	0	0	0	0	0
903	MH816025	p:Firmicutes	f:Clostridiaceae(0.9900)	g:Clostridium(0.9900)	s:Clostridium_neopropionicum(0.9600)		0	0	0	0	0	0	4	0	0	0	0	0	0	0	0	0	0	0	0	0	0	0	0	0	0	0	0	0	0	0	0	0	0	0	0	0	0	0	0	0	0	0	0
904	MH816026	p:Proteobacteria	f:Desulfobacteraceae(0.1300)	g:Acholeplasma(0.0800)	s:Acholeplasma_equifetale(0.0700)		0	0	0	0	0	0	0	0	0	0	0	0	0	0	0	0	18	0	0	0	0	0	0	0	0	0	0	0	0	0	0	0	0	0	0	0	0	0	0	0	0	0	0
905	MH816027	p:Bacteroidetes	f:Cryomorphaceae(0.5600)	g:Phaeocystidibacter(0.4900)	s:Phaeocystidibacter_luteus(0.4900)		0	0	0	0	0	0	0	0	0	0	0	0	0	0	3	0	19	0	0	0	0	0	0	0	0	0	0	0	0	0	0	0	0	0	0	0	0	0	0	0	0	0	0
906	MH816028	p:Bacteroidetes	f:Flavobacteriaceae(1.0000)	g:Flavobacterium(1.0000)	s:Flavobacterium_ginsenosidimutans(0.6300)		0	4	19	0	0	0	0	0	4	18	6	0	0	0	0	0	39	10	0	1	0	0	1	0	0	0	0	0	0	0	0	0	0	0	0	0	0	0	0	0	0	0	0
909	MH816029	p:Bacteroidetes	f:Cytophagaceae(1.0000)	g:Runella(1.0000)	s:Runella_slithyformis(0.9300)		0	0	7	0	0	0	0	0	0	0	0	0	0	0	0	0	0	0	0	0	0	0	0	0	0	0	0	0	0	0	0	0	0	0	0	0	0	0	0	0	0	0	0
910	MH816030	p:Proteobacteria	f:Rhodanobacteraceae(0.3700)	g:Dokdonella(0.1800)	s:Dokdonella_ginsengisoli(0.1700)		0	0	0	0	0	0	0	0	0	0	15	0	0	0	0	0	0	0	0	0	0	0	0	0	0	0	0	0	0	2	0	0	0	0	0	0	0	0	0	0	0	0	0
911	MH816031	p:Firmicutes	f:Unclassified_Clostridiales(0.6500)	g:Natranaerovirga(0.6300)	s:Natranaerovirga_pectinivora(0.4700)		0	0	0	0	0	0	4	0	0	0	0	0	0	0	0	0	0	0	0	0	0	0	0	0	0	0	0	0	0	0	0	0	0	0	0	0	0	0	0	0	0	0	0
912	MH816032	p:Proteobacteria	f:Xanthobacteraceae(1.0000)	g:Xanthobacter(0.9700)	s:Xanthobacter_aminoxidans(0.8800)		0	1	6	0	0	0	0	0	0	0	0	0	0	0	0	0	0	0	0	0	0	0	0	0	0	0	0	0	0	0	0	0	0	0	0	0	0	0	0	0	0	0	0
913	MH816033	p:Tenericutes	f:Mycoplasmataceae(0.2200)	g:Mycoplasma(0.2200)	s:Mycoplasma_collis(0.1000)		0	0	0	0	0	0	0	0	7	29	0	0	5	0	1	0	24	0	0	0	0	0	0	0	0	0	0	0	0	0	0	0	0	0	0	0	0	0	0	0	0	0	0
915	MH816034	p:Verrucomicrobia	f:Opitutaceae(0.9300)	g:Alterococcus(0.6000)	s:Alterococcus_agarolyticus(0.6000)		0	0	0	0	0	0	0	0	3	0	0	0	0	2	0	0	13	0	0	0	0	0	0	0	0	0	0	0	0	0	0	0	0	0	0	0	0	0	0	0	0	0	0
916	MH816035	p:Bacteroidetes	f:Flammeovirgaceae(0.3500)	g:Fabibacter(0.2700)	s:Fabibacter_halotolerans(0.1400)		0	0	1	0	0	0	0	0	0	0	0	18	0	0	0	0	14	0	0	0	0	0	0	0	0	0	0	0	0	0	0	0	0	0	0	0	0	0	0	0	0	0	0
917	MH816036	p:Firmicutes	f:Streptococcaceae(1.0000)	g:Streptococcus(1.0000)	s:Streptococcus_canis(0.2200)		0	0	0	0	0	0	0	0	0	17	0	0	0	0	0	0	0	0	0	0	0	0	0	0	0	0	0	0	0	0	0	0	0	0	0	0	0	0	0	0	0	0	0
918	MH816037	p:Firmicutes	f:Clostridiaceae(0.1500)	g:Clostridium(0.1000)	s:Algibacter_aestuarii(0.0700)		0	0	0	0	0	0	0	0	0	0	17	0	0	0	0	0	0	0	0	0	0	0	0	0	0	0	0	0	0	0	0	0	0	0	0	0	0	0	0	0	0	0	0
920	MH816038	p:Firmicutes	f:Aerococcaceae(0.9200)	g:Facklamia(0.8000)	s:Facklamia_hominis(0.6300)		0	0	0	0	17	0	0	0	0	0	0	0	0	0	0	0	0	9	0	0	0	0	0	0	0	0	0	0	0	0	0	0	0	0	0	0	0	0	0	0	0	0	0
921	MH816039	p:Actinobacteria	f:Micromonosporaceae(0.3000)	g:Aciditerrimonas(0.2800)	s:Aciditerrimonas_ferrireducens(0.2800)		0	0	0	0	0	0	0	0	0	0	15	0	0	0	0	0	0	0	0	0	0	0	0	0	0	0	0	0	0	0	0	0	0	0	0	0	0	0	0	0	0	0	0
922	MH816040	p:Actinobacteria	f:Microbacteriaceae(0.9600)	g:Pseudoclavibacter(0.4700)	s:Pseudoclavibacter_helvolus(0.4400)		0	0	0	0	0	0	0	0	0	0	0	0	0	0	0	0	0	0	0	0	0	0	0	0	0	0	0	0	0	4	0	0	0	0	0	0	0	0	0	0	0	0	0
923	MH816041	p:Proteobacteria	f:Lysobacteraceae(0.1900)	g:Arenimonas(0.1000)	s:Arenimonas_daejeonensis(0.0700)		0	0	0	0	0	0	0	0	0	0	18	0	0	0	0	0	0	0	0	0	0	0	0	0	0	0	0	0	0	0	0	0	0	0	0	0	0	0	0	0	0	0	0
924	MH816042	p:Proteobacteria	f:Sphingomonadaceae(1.0000)	g:Sphingomonas(0.4800)	s:Sphingomonas_aestuarii(0.2100)		0	0	0	0	0	0	0	0	0	0	0	0	0	0	0	0	0	0	0	0	0	0	0	0	0	0	0	0	0	2	0	0	0	0	0	0	0	0	1	0	0	0	0
925	MH816043	p:Proteobacteria	f:Oxalobacteraceae(0.9700)	g:Massilia(0.9700)	s:Massilia_aerilata(0.9700)		0	0	5	0	0	0	23	0	0	0	0	0	0	0	0	0	0	0	0	0	0	0	0	0	0	0	0	0	0	2	0	0	0	0	0	0	0	0	0	0	0	2	0
927	MH816044	p:Proteobacteria	f:Rhodocyclaceae(1.0000)	g:Uliginosibacterium(0.6400)	s:Uliginosibacterium_gangwonense(0.6400)		0	0	0	0	0	0	0	0	0	15	0	0	0	0	0	0	0	0	0	0	0	0	0	0	0	0	0	0	0	0	0	0	0	0	0	0	0	0	0	0	0	0	0
928	MH816045	p:Firmicutes	f:Clostridiaceae(0.5900)	g:Clostridium(0.5400)	s:Clostridium_viride(0.5200)		0	0	0	0	0	0	4	0	0	0	0	0	0	0	0	0	0	0	0	0	0	0	0	0	0	0	0	0	0	0	0	0	0	0	0	0	0	0	0	0	0	0	0
929	MH816046	p:Proteobacteria	f:Campylobacteraceae(0.0800)	g:Campylobacter(0.0600)	s:Aureispira_marina(0.0400)		0	0	0	0	0	0	0	0	0	0	0	0	0	0	0	0	13	0	0	0	0	0	0	0	0	0	0	0	0	0	0	0	0	0	0	0	0	0	0	0	0	0	0
930	MH816047	p:Proteobacteria	f:Desulfovibrionaceae(0.4100)	g:Desulfovibrio(0.4100)	s:Desulfovibrio_tunisiensis(0.2300)		0	0	0	0	0	0	0	0	0	0	0	0	0	0	0	0	22	0	0	0	0	0	0	0	0	0	0	0	0	0	0	0	0	0	0	0	0	0	0	0	0	0	0
931	MH816048	p:Tenericutes	f:Mycoplasmataceae(1.0000)	g:Mycoplasma(1.0000)	s:Mycoplasma_falconis(0.5600)		0	0	0	0	0	17	0	0	0	0	0	0	0	0	0	0	0	0	0	0	0	0	0	0	0	0	0	0	0	0	0	0	0	0	0	0	0	0	0	0	0	0	0
933	MH816049	p:Verrucomicrobia	f:Unclassified_Spartobacteria(0.4200)	g:Limisphaera(0.4200)	s:Limisphaera_ngatamarikiensis(0.4200)		0	0	0	0	0	0	0	0	0	0	0	0	0	0	0	0	16	0	0	0	0	0	0	0	0	0	0	0	0	0	0	0	0	0	0	0	0	0	0	0	0	0	0
934	MH816050	p:Firmicutes	f:Lactobacillaceae(1.0000)	g:Pediococcus(0.9900)	s:Pediococcus_pentosaceus(0.5500)		0	0	0	0	63	28	15	0	0	0	12	0	10	10	6	89	29	1	0	0	0	1	0	0	0	0	0	0	0	0	0	0	0	0	0	0	0	0	0	0	0	0	0
935	MH816051	p:Firmicutes	f:Lachnospiraceae(1.0000)	g:Stomatobaculum(1.0000)	s:Stomatobaculum_longum(1.0000)		0	0	0	0	0	0	0	0	0	0	0	0	0	0	0	0	0	0	0	0	0	0	0	0	0	0	0	0	0	0	0	0	0	0	0	0	20	0	0	0	0	0	0
936	MH816052	p:Bacteroidetes	f:Cytophagaceae(0.6900)	g:Cytophaga(0.4100)	s:Cesiribacter_roseus(0.2200)		0	0	0	0	0	0	0	0	0	0	12	0	0	0	0	0	0	0	0	0	0	0	0	0	0	0	0	0	0	0	0	0	0	0	0	0	0	0	0	0	0	0	0
938	MH816053	p:Actinobacteria	f:Cellulomonadaceae(0.9200)	g:Oerskovia(0.9000)	s:Oerskovia_jenensis(0.5700)		0	0	0	0	0	0	1	11	6	0	0	0	0	0	0	0	0	0	0	0	0	0	0	0	0	0	0	0	0	0	0	0	0	0	0	0	0	0	0	0	0	0	0
940	MH816054	p:Firmicutes	f:Clostridiaceae(0.8800)	g:Clostridium(0.8800)	s:Clostridium_methylpentosum(0.8800)		0	0	0	0	0	0	5	0	0	0	0	0	0	0	0	0	0	0	0	0	0	0	0	0	0	0	0	0	0	0	0	0	0	0	0	0	0	0	0	0	0	0	0
943	MH816055	p:Bacteroidetes	f:Chitinophagaceae(0.3500)	g:Flavobacterium(0.1100)	s:Hydrotalea_sandarakina(0.1100)		0	0	0	0	24	0	0	0	0	0	0	0	0	0	0	0	0	0	0	0	0	0	0	0	0	0	0	0	0	0	0	0	0	0	0	0	0	0	0	0	0	0	0
945	MH816056	p:Planctomycetes	f:Planctomycetaceae(1.0000)	g:Planctomicrobium(1.0000)	s:Planctomicrobium_piriforme(1.0000)		0	0	0	0	0	0	0	0	0	0	15	0	0	0	0	0	0	0	0	0	0	0	0	0	0	0	0	0	0	0	0	0	0	0	0	0	0	0	0	0	0	0	0
947	MH816057	p:Proteobacteria	f:Beijerinckiaceae(0.9900)	g:Beijerinckia(0.9900)	s:Beijerinckia_fluminensis(0.9900)		0	1	5	0	2	0	0	0	0	27	1	2	0	1	0	0	0	0	0	0	0	0	0	0	0	0	0	0	0	0	1	2	0	0	0	0	0	0	0	0	0	0	0
948	MH816058	p:Verrucomicrobia	f:Puniceicoccaceae(0.7400)	g:Cerasicoccus(0.6000)	s:Cerasicoccus_arenae(0.6000)		0	0	0	0	0	0	0	0	0	0	0	0	0	0	0	0	0	0	0	0	0	0	0	0	0	0	0	0	0	2	0	0	0	0	0	1	0	0	0	0	0	0	0
949	MH816059	p:Planctomycetes	f:Planctomycetaceae(1.0000)	g:Aquisphaera(0.5600)	s:Aquisphaera_giovannonii(0.5600)		0	0	0	0	12	0	0	0	0	0	0	0	0	0	0	0	0	0	0	0	0	0	0	0	0	0	0	0	0	0	0	0	0	0	0	0	0	0	0	0	0	0	0
951	MH816060	p:Chlamydiae	f:Parachlamydiaceae(0.8300)	g:Parachlamydia(0.5800)	s:Parachlamydia_acanthamoebae(0.5800)		0	0	0	0	0	9	0	0	0	0	0	0	0	0	0	0	9	0	0	0	0	0	0	0	0	0	0	0	0	0	0	0	0	0	0	0	0	0	0	0	0	0	0
952	MH816061	p:Firmicutes	f:Clostridiaceae(0.6900)	g:Clostridium(0.6900)	s:Clostridium_methylpentosum(0.6900)		0	0	0	0	0	0	6	0	0	0	0	0	0	0	0	0	0	0	0	0	0	0	0	0	0	0	0	0	0	0	0	0	0	0	0	0	0	0	0	0	0	0	0
953	MH816062	p:Proteobacteria	f:Bdellovibrionaceae(0.9800)	g:Vampirovibrio(0.9800)	s:Vampirovibrio_chlorellavorus(0.9800)		0	11	4	0	0	0	0	0	0	0	0	0	0	0	0	0	31	0	0	0	0	0	0	0	0	0	0	0	0	0	0	0	0	0	0	0	0	0	0	0	0	0	0
954	MH816063	p:Actinobacteria	f:Iamiaceae(0.9300)	g:Aquihabitans(0.8900)	s:Aquihabitans_daechungensis(0.8900)		0	0	0	0	0	0	0	0	0	0	0	0	0	0	0	0	0	0	0	0	0	0	0	0	0	0	0	0	0	0	0	0	0	0	0	0	0	0	0	0	0	0	0
955	MH816064	p:Proteobacteria	f:Sutterellaceae(0.2500)	g:Sutterella(0.2500)	s:Sutterella_stercoricanis(0.1200)		0	0	0	0	20	0	0	0	0	0	0	0	0	0	0	0	0	0	0	0	0	0	0	0	0	0	0	0	0	0	0	0	0	0	0	0	0	0	0	0	0	0	0
956	MH816065	p:Verrucomicrobia	f:Verrucomicrobiaceae(1.0000)	g:Prosthecobacter(0.9600)	s:Prosthecobacter_vanneervenii(0.7000)		0	0	0	0	0	0	0	0	0	0	0	0	0	0	0	0	0	0	0	0	0	0	0	0	0	0	0	0	0	6	0	0	0	0	0	0	0	0	0	0	0	0	0
957	MH816066	p:Actinobacteria	f:Micrococcaceae(1.0000)	g:Rothia(1.0000)	s:Rothia_dentocariosa(0.9500)		0	0	0	0	0	7	7	0	2	0	0	0	4	10	3	0	22	39	0	0	0	0	0	0	0	0	0	0	0	5	0	0	1	0	0	2	0	0	0	0	0	0	0
959	MH816067	p:Proteobacteria	f:Rhodospirillaceae(0.9200)	g:Aestuariispira(0.8300)	s:Aestuariispira_insulae(0.8300)		0	0	0	0	0	0	3	0	0	0	0	0	0	0	0	0	0	0	0	0	0	0	0	0	0	0	0	0	0	0	0	0	0	0	0	0	0	0	0	0	0	0	0
960	MH816068	p:Proteobacteria	f:Xanthobacteraceae(0.4400)	g:Variibacter(0.2100)	s:Variibacter_gotjawalensis(0.2100)		0	0	0	0	0	13	0	0	0	0	0	0	0	0	0	0	0	0	0	0	0	0	0	0	0	0	0	0	0	0	0	0	0	0	0	0	0	0	0	0	0	0	0
961	MH816069	p:Bacteroidetes	f:Cryomorphaceae(0.6200)	g:Fluviicola(0.5800)	s:Fluviicola_hefeinensis(0.4600)		0	0	0	0	0	6	0	0	0	0	0	0	0	0	0	0	19	0	0	0	0	0	0	0	0	0	0	0	0	0	0	0	0	0	0	0	0	0	0	0	0	0	0
962	MH816070	p:Proteobacteria	f:Caulobacteraceae(0.9900)	g:Phenylobacterium(0.8600)	s:Phenylobacterium_composti(0.4800)		0	0	0	0	0	0	4	0	0	0	0	0	0	0	0	0	0	0	0	0	0	0	0	0	0	0	0	0	0	0	0	0	0	0	0	0	0	0	0	0	0	0	0
963	MH816071	p:Bacteroidetes	f:Chitinophagaceae(0.5700)	g:Ferruginibacter(0.1500)	s:Ferruginibacter_lapsinanis(0.1500)		0	0	0	0	0	0	0	0	0	0	0	0	0	0	0	0	12	0	0	0	0	0	0	0	0	0	0	0	0	0	0	0	0	0	0	0	0	0	0	0	0	0	0
964	MH816072	p:Proteobacteria	f:Micropepsaceae	g:Rhizomicrobium(0.6500)	s:Rhizomicrobium_electricum(0.5500)		0	1	1	0	0	0	14	1	0	0	0	0	0	2	0	0	16	7	0	0	0	0	0	0	0	0	0	0	0	0	0	0	0	0	0	0	0	0	0	0	0	0	0
965	MH816073	p:Firmicutes	f:Clostridiaceae(0.9900)	g:Clostridium(0.9900)	s:Clostridium_cocleatum(0.9900)		0	0	0	0	0	0	5	0	0	0	0	0	0	0	0	0	0	0	0	0	0	0	0	0	0	0	0	0	0	0	0	0	0	0	0	0	0	0	0	0	0	0	0
966	MH816074	p:Firmicutes	f:Acholeplasmataceae(0.3500)	g:Acholeplasma(0.3500)	s:Acholeplasma_brassicae(0.2500)		0	0	0	0	0	0	7	0	0	0	0	0	0	0	0	0	0	0	0	0	0	0	0	0	0	0	0	0	0	0	0	0	0	0	0	0	0	0	0	0	0	0	0
967	MH816075	p:Proteobacteria	f:Burkholderiaceae(0.9900)	g:Cupriavidus(0.9900)	s:Cupriavidus_campinensis(0.7200)		0	0	1	0	39	13	10	0	0	30	23	25	14	0	3	0	12	5	0	0	0	0	0	0	0	1	1	0	0	3	0	0	0	0	0	0	0	0	0	0	0	0	0
968	MH816076	p:Chlamydiae	f:Parachlamydiaceae(0.8900)	g:Neochlamydia(0.6700)	s:Neochlamydia_hartmannellae(0.6700)		0	3	15	0	0	0	0	0	0	0	0	0	0	0	0	0	4	0	0	0	0	0	0	0	0	0	0	0	0	0	0	0	0	0	0	0	0	0	0	0	0	0	0
969	MH816077	p:Proteobacteria	f:Pasteurellaceae(0.0900)	g:Selenihalanaerobacter(0.0500)	s:Selenihalanaerobacter_shriftii(0.0500)		0	0	0	0	0	0	0	0	0	0	0	0	0	0	0	0	6	0	0	0	0	0	0	0	0	0	0	0	0	0	0	0	0	0	0	0	0	0	0	0	0	0	0
970	MH816078	p:Actinobacteria	f:Beutenbergiaceae(0.3700)	g:Georgenia(0.1800)	s:Serinibacter_salmoneus(0.1700)		0	0	0	0	0	0	0	0	0	0	17	0	0	0	0	0	0	0	0	0	0	0	0	0	0	0	0	0	0	0	0	0	0	0	0	0	0	0	0	0	0	0	0
971	MH816079	p:Actinobacteria	f:Nocardioidaceae(1.0000)	g:Nocardioides(1.0000)	s:Nocardioides_panacisoli(0.3700)		0	0	0	0	0	8	0	0	0	0	0	0	0	0	0	0	13	0	0	0	0	0	0	0	0	0	0	0	0	0	0	0	0	0	0	0	0	0	0	0	0	0	0
972	MH816080	p:Bacteroidetes	f:Flammeovirgaceae(0.2500)	g:Solitalea(0.1500)	s:Solitalea_koreensis(0.1500)		0	0	0	0	12	0	0	0	0	0	0	0	0	6	3	0	2	0	0	0	0	0	0	0	0	0	0	0	0	0	0	0	0	0	0	0	0	0	0	0	0	0	0
973	MH816081	p:Firmicutes	f:Paenibacillaceae(1.0000)	g:Paenibacillus(0.9900)	s:Paenibacillus_lautus(0.8000)		0	0	0	0	0	5	0	0	0	0	17	0	0	0	0	0	0	0	0	0	0	0	0	0	0	0	0	0	0	0	0	0	0	0	0	0	0	0	0	0	0	0	0
974	MH816082	p:Proteobacteria	f:Campylobacteraceae(0.2400)	g:Arcobacter(0.1300)	s:Campylobacter_sputorum_subsp._bubulus(0.0800)		0	0	0	0	0	7	0	0	0	0	8	0	0	0	0	0	0	0	0	0	0	0	0	0	0	0	0	0	0	0	0	0	0	0	0	0	0	0	0	0	0	0	0
975	MH816083	p:Planctomycetes	f:Planctomycetaceae(0.8900)	g:Planctopirus(0.3200)	s:Planctopirus_limnophila(0.3200)		0	0	0	0	0	0	0	0	0	0	0	0	0	0	0	0	0	0	0	0	0	0	0	0	0	0	0	0	0	0	0	0	0	0	0	0	0	0	0	0	0	0	0
976	MH816084	p:Bacteroidetes	f:Sphingobacteriaceae(1.0000)	g:Sphingobacterium(1.0000)	s:Sphingobacterium_anhuiense(1.0000)		0	0	0	0	0	0	4	0	0	0	0	0	0	0	0	0	0	5	0	0	0	0	0	0	0	0	0	0	0	0	0	0	0	0	0	0	0	0	0	0	0	0	0
979	MH816085	p:Bacteroidetes	f:Cytophagaceae(0.9100)	g:Persicitalea(0.4100)	s:Persicitalea_jodogahamensis(0.4100)		0	0	0	0	0	0	0	0	0	22	0	0	0	0	0	0	0	0	0	0	0	0	0	0	0	0	0	0	0	0	0	0	0	0	0	0	0	0	0	0	0	0	0
981	MH816086	p:Actinobacteria	f:Geodermatophilaceae(1.0000)	g:Geodermatophilus(1.0000)	s:Geodermatophilus_brasiliensis(0.9700)		0	0	0	0	0	0	1	0	0	0	0	0	0	0	0	0	0	0	0	0	0	0	0	0	0	0	0	0	0	0	1	0	0	0	0	0	0	0	0	0	0	0	0
982	MH816087	p:Spirochaetes	f:Spirochaetaceae(1.0000)	g:Treponema(1.0000)	s:Treponema_socranskii_subsp._buccale(1.0000)		0	0	0	0	0	14	0	0	0	0	0	0	0	0	0	0	0	0	0	0	0	0	0	0	0	0	0	0	0	3	0	0	0	0	0	0	0	0	0	0	0	0	0
983	MH816088	p:Bacteroidetes	f:Chitinophagaceae(0.2900)	g:Paludibacter(0.1400)	s:Paludibacter_propionicigenes(0.1400)		0	0	0	0	0	11	0	0	5	0	0	0	0	0	0	0	0	0	0	0	0	0	0	0	0	0	0	0	0	0	0	0	0	0	0	0	0	0	0	0	0	0	0
984	MH816089	p:Bacteroidetes	f:Flavobacteriaceae(0.2900)	g:Flavobacterium(0.0600)	s:Muricauda_antarctica(0.0400)		0	0	0	0	0	0	0	0	0	23	0	0	0	0	0	0	0	0	0	0	0	0	0	0	0	0	0	0	0	0	0	0	0	0	0	0	0	0	0	0	0	0	0
985	MH816090	p:Proteobacteria	f:Burkholderiaceae(0.4400)	g:Burkholderia(0.3000)	s:Azonexus_caeni(0.2300)		0	0	0	0	0	0	0	0	0	0	0	0	0	0	0	0	0	0	0	0	0	0	0	0	0	0	0	0	0	3	0	0	0	0	0	0	0	0	0	0	0	0	0
986	MH816091	p:Verrucomicrobia	f:Verrucomicrobiaceae(1.0000)	g:Luteolibacter(0.8900)	s:Luteolibacter_cuticulihirudinis(0.8100)		0	0	8	0	0	0	0	0	0	0	0	0	0	0	0	0	0	0	0	0	0	0	0	0	0	0	0	0	0	0	0	0	0	0	0	0	0	0	0	0	0	0	0
988	MH816092	p:Proteobacteria	f:Enterobacteriaceae(1.0000)	g:Erwinia(0.2400)	s:Citrobacter_youngae(0.1700)		0	0	0	0	0	0	0	0	0	0	15	0	0	0	0	0	0	0	0	4	0	0	1	0	6	1	0	0	0	0	0	0	0	0	0	0	0	0	0	0	0	0	0
989	MH816093	p:Proteobacteria	f:Moraxellaceae(1.0000)	g:Acinetobacter(1.0000)	s:Acinetobacter_bohemicus(0.8600)		0	0	0	0	0	0	2	0	0	0	0	0	0	0	0	0	0	5	0	0	0	0	0	0	0	0	0	0	0	0	0	0	0	0	0	0	0	0	0	0	0	0	0
990	MH816094	p:Proteobacteria	f:Rhodocyclaceae(0.1300)	g:Rhodomicrobium(0.1000)	s:Rhodomicrobium_udaipurense(0.0700)		0	0	0	0	0	0	0	0	0	15	0	0	0	0	0	0	0	0	0	0	0	0	0	0	0	0	0	0	0	0	0	0	0	0	0	0	0	0	0	0	0	0	0
991	MH816095	p:Bacteroidetes	f:Cyclobacteriaceae(1.0000)	g:Algoriphagus(1.0000)	s:Algoriphagus_aquatilis(0.7800)		0	0	0	0	0	0	0	0	0	0	0	0	0	0	0	0	0	0	0	0	0	0	0	0	0	0	0	0	0	5	0	0	0	0	0	0	0	0	0	0	0	0	0
992	MH816096	p:Bacteroidetes	f:Cytophagaceae(0.4800)	g:Algoriphagus(0.1200)	s:Siphonobacter_aquaeclarae(0.0600)		0	0	0	0	0	0	0	0	0	0	0	32	0	0	0	0	0	0	0	0	0	0	0	0	0	0	0	0	0	0	0	0	0	0	0	0	0	0	0	0	0	0	0
994	MH816097	p:Actinobacteria	f:Conexibacteraceae(0.9700)	g:Conexibacter(0.9700)	s:Conexibacter_woesei(0.8600)		0	0	0	0	0	0	11	0	0	0	0	0	0	0	0	0	0	0	1	0	0	0	0	0	0	0	0	0	0	0	0	0	0	0	0	0	0	0	0	0	0	0	0
996	MH816098	p:Proteobacteria	f:Unclassified_Thiotrichales(0.2600)	g:Caedibacter(0.2600)	s:Caedibacter_caryophilus(0.2600)		0	0	0	0	11	0	0	0	0	0	0	0	0	0	0	0	0	0	0	0	0	0	0	0	0	0	0	0	0	0	0	0	0	0	0	0	0	0	0	0	0	0	0
997	MH816099	p:Firmicutes	f:Unclassified_Clostridiales(0.4100)	g:Anaerovorax(0.4100)	s:Anaerovorax_odorimutans(0.4100)		0	0	0	0	0	0	7	0	0	0	0	0	0	0	0	0	0	0	0	0	0	0	0	0	0	0	0	0	0	0	0	0	0	0	0	0	0	0	0	0	0	0	0
998	MH816100	p:Actinobacteria	f:Solirubrobacteraceae(1.0000)	g:Solirubrobacter(1.0000)	s:Solirubrobacter_ginsenosidimutans(1.0000)		0	0	0	0	0	0	0	0	11	0	0	0	0	0	0	0	0	0	0	0	0	0	0	0	0	0	0	0	0	0	0	0	0	0	0	0	0	0	0	0	0	0	0
999	MH816101	p:Proteobacteria	f:Acetobacteraceae(1.0000)	g:Acidisoma(0.5400)	s:Acidisoma_sibiricum(0.4500)		0	0	0	0	0	0	3	0	0	0	0	0	0	0	0	0	0	0	0	0	0	0	0	0	0	0	0	0	0	0	0	0	0	0	0	0	0	0	0	0	0	0	0
1002	MH816102	p:Acidobacteria	f:Unclassified_Elusimicrobia(1.0000)	g:Aridibacter(0.6900)	s:Aridibacter_famidurans(0.6900)		0	0	0	0	0	0	4	0	0	0	0	0	0	0	0	0	0	0	0	0	0	0	0	0	0	0	0	0	0	0	0	0	0	0	0	0	0	0	0	0	0	0	0
1003	MH816103	p:Acidobacteria	f:Unclassified_Elusimicrobia(0.3400)	g:Aridibacter(0.3200)	s:Aridibacter_famidurans(0.1600)		0	0	0	0	0	0	0	0	0	0	0	0	0	0	0	15	0	0	0	0	0	0	0	0	0	0	0	0	0	0	0	0	0	0	0	0	0	0	0	0	0	0	0
1004	MH816104	p:Proteobacteria	f:Rhodobiaceae(0.3500)	g:Anderseniella(0.1700)	s:Anderseniella_baltica(0.1700)		0	0	0	0	0	0	0	0	0	0	0	0	0	0	0	0	13	0	0	0	0	0	0	0	0	0	0	0	0	0	0	0	0	0	0	0	0	0	0	0	0	0	0
1005	MH816105	p:Proteobacteria	f:Rhodobacteraceae(0.4100)	g:Sandarakinorhabdus(0.1500)	s:Sandarakinorhabdus_limnophila(0.1500)		0	1	9	0	10	0	0	0	0	0	0	0	0	0	0	0	0	1	0	0	0	0	0	0	0	0	0	0	0	0	0	0	0	0	0	0	0	0	0	0	0	0	0
1006	MH816106	p:Proteobacteria	f:Unclassified_Lysobacteriales(0.5100)	g:Povalibacter(0.5100)	s:Povalibacter_uvarum(0.5100)		0	0	0	0	0	0	0	0	11	0	0	0	0	0	0	0	0	0	0	0	0	0	0	0	0	0	0	0	0	0	0	0	0	0	0	0	0	0	0	0	0	0	0
1007	MH816107	p:Bacteroidetes	f:Rikenellaceae(0.8600)	g:Alistipes(0.8500)	s:Alistipes_finegoldii(0.5200)		0	0	0	0	0	0	4	0	0	0	0	0	0	0	0	0	0	0	0	0	0	0	0	0	0	0	0	0	0	0	0	0	0	0	0	0	0	0	0	0	0	0	0
1008	MH816108	p:Fusobacteria	f:Leptotrichiaceae(1.0000)	g:Leptotrichia(1.0000)	s:Leptotrichia_shahii(0.4000)		0	0	0	0	18	0	0	0	0	0	0	0	0	0	0	0	0	0	0	0	0	0	0	0	0	0	0	0	0	0	0	0	0	0	0	0	0	0	0	0	0	0	0
1009	MH816109	p:Firmicutes	f:Clostridiaceae(0.7900)	g:Alkaliphilus(0.7400)	s:Alkaliphilus_crotonatoxidans(0.7400)		0	0	0	0	0	0	4	0	0	0	0	0	0	0	0	0	0	0	0	0	0	0	0	0	0	0	0	0	0	0	0	0	0	0	0	0	0	0	0	0	0	0	0
1010	MH816110	p:Firmicutes	f:Bacillaceae(0.1900)	g:Sulfobacillus(0.0800)	s:Sulfobacillus_acidophilus(0.0700)		0	0	0	0	0	7	0	0	0	0	0	0	0	0	2	0	0	0	0	0	0	0	0	0	0	0	0	0	0	0	0	0	0	0	0	0	0	0	0	0	0	0	0
1014	MH816111	p:Firmicutes	f:Clostridiaceae(0.4400)	g:Alkaliphilus(0.2700)	s:Alkaliphilus_crotonatoxidans(0.2700)		0	0	0	0	0	13	0	0	0	0	0	0	0	0	0	0	0	0	0	0	0	0	0	0	0	0	0	0	0	0	0	0	0	0	0	0	0	0	0	0	0	0	0
1015	MH816112	p:Proteobacteria	f:Rhodospirillaceae(0.9600)	g:Nitrospirillum(0.7900)	s:Nitrospirillum_amazonense(0.7900)		0	0	0	0	0	0	2	0	0	0	0	0	0	0	0	0	0	0	0	0	0	0	0	0	0	0	0	0	0	0	0	0	0	0	0	0	0	0	0	0	0	0	0
1016	MH816113	p:Firmicutes	f:Lachnospiraceae(0.6700)	g:Roseburia(0.6700)	s:Roseburia_faecis(0.6300)		0	0	0	0	0	0	1	0	5	0	0	0	0	0	0	0	0	0	0	0	0	0	0	0	0	0	0	0	0	0	0	0	0	0	0	0	0	0	0	0	0	0	0
1017	MH816114	p:Tenericutes	f:Mycoplasmataceae(0.3600)	g:Mycoplasma(0.3600)	s:Mycoplasma_leonicaptivi(0.0800)		0	0	0	0	0	0	0	0	0	0	0	0	0	0	0	0	0	0	0	0	0	0	0	0	0	0	0	0	0	3	0	0	0	0	0	0	0	0	0	0	0	0	0
1021	MH816115	p:Proteobacteria	f:Xanthobacteraceae(0.7600)	g:Pseudolabrys(0.7300)	s:Pseudolabrys_taiwanensis(0.7300)		1	0	0	0	0	0	0	0	0	0	13	0	0	0	0	0	0	0	0	0	0	0	0	0	0	0	0	0	0	0	0	0	0	0	0	0	0	0	0	0	0	0	0
1024	MH816116	p:Proteobacteria	f:Methylophilaceae(0.9900)	g:Methylophilus(0.9900)	s:Methylophilus_flavus(0.9600)		0	0	0	0	0	0	0	0	0	0	0	0	0	0	0	0	0	0	0	0	0	0	0	0	0	0	0	0	0	9	0	0	0	0	0	0	0	0	1	0	0	0	0
1026	MH816117	p:Bacteroidetes	f:Flavobacteriaceae(0.0900)	g:Bacteroides(0.0400)	s:Aquimonas_voraii(0.0300)		0	0	0	0	0	0	0	0	0	0	3	0	0	0	0	0	6	1	0	0	0	0	0	0	0	0	0	0	0	0	0	0	0	0	0	0	0	0	0	0	0	0	0
1027	MH816118	p:Planctomycetes	f:Planctomycetaceae(1.0000)	g:Singulisphaera(0.6400)	s:Singulisphaera_acidiphila(0.4900)		0	0	0	0	0	15	0	0	0	0	0	0	0	0	0	0	0	0	0	0	0	0	0	0	0	0	0	0	0	0	0	0	0	0	0	0	0	0	0	0	0	0	0
1028	MH816119	p:Firmicutes	f:Clostridiaceae(0.6600)	g:Alkaliphilus(0.4300)	s:Alkaliphilus_crotonatoxidans(0.4300)		0	0	0	0	0	0	5	0	0	0	0	0	0	0	0	0	0	0	0	0	0	0	0	0	0	0	0	0	0	0	0	0	0	0	0	0	0	0	0	0	0	0	0
1032	MH816120	p:Bacteroidetes	f:Flavobacteriaceae(0.0600)	g:Luteimonas(0.0300)	s:Bartonella_acomydis(0.0200)		0	0	0	0	0	0	0	0	0	0	0	0	0	0	0	0	0	0	0	0	0	0	0	0	0	0	0	0	0	0	0	12	0	0	0	0	0	0	0	0	0	0	9
1033	MH816121	p:Actinobacteria	f:Actinomycetaceae(1.0000)	g:Actinomyces(1.0000)	s:Actinomyces_dentalis(1.0000)		0	0	0	0	0	0	0	0	0	0	11	0	0	0	0	0	0	0	0	0	0	0	0	0	0	0	0	0	0	2	0	0	0	0	0	0	1	0	0	0	0	0	0
1035	MH816122	p:Bacteroidetes	f:Porphyromonadaceae(1.0000)	g:Petrimonas(1.0000)	s:Petrimonas_sulfuriphila(1.0000)		0	0	0	0	17	0	0	0	0	0	0	0	0	0	0	0	0	0	0	0	0	0	0	0	0	0	0	0	0	0	0	0	0	0	0	0	0	0	0	0	0	0	0
1038	MH816123	p:Bacteroidetes	f:Prevotellaceae(1.0000)	g:Prevotella(0.9600)	s:Prevotella_denticola(0.5300)		0	0	0	0	0	13	0	0	0	0	0	0	0	0	0	0	0	0	0	0	0	0	0	0	0	0	0	0	0	0	0	0	0	0	0	0	0	0	0	0	0	0	0
1039	MH816124	p:Proteobacteria	f:Rhodocyclaceae(1.0000)	g:Azospira(1.0000)	s:Azospira_oryzae(1.0000)		0	0	2	0	0	0	4	0	0	0	0	0	0	0	0	0	0	0	0	0	0	0	0	0	0	0	0	0	0	0	0	0	0	0	0	0	0	0	0	0	0	0	0
1040	MH816125	p:Planctomycetes	f:Planctomycetaceae(1.0000)	g:Pirellula(0.9700)	s:Pirellula_staleyi(0.9700)		0	0	0	0	0	11	0	0	0	0	0	0	0	0	0	0	0	0	0	0	0	0	0	0	0	0	0	0	0	0	0	0	0	0	0	0	0	0	0	0	0	0	0
1041	MH816126	p:Proteobacteria	f:Caulobacteraceae(0.2100)	g:Caulobacter(0.1900)	s:Caulobacter_profundus(0.1900)		0	0	0	0	4	9	0	0	0	0	0	0	0	0	0	0	0	0	0	0	0	0	0	0	0	0	0	0	0	0	0	0	0	0	0	0	0	0	0	0	0	0	0
1042	MH816127	p:Proteobacteria	f:Pseudomonadaceae(1.0000)	g:Pseudomonas(1.0000)	s:Pseudomonas_lini(0.6600)		0	1	0	0	2	0	35	0	32	1	67	23	23	1	0	0	31	1	0	0	0	0	0	0	0	0	0	1	0	0	0	0	0	0	1	2	45	0	574	0	12	0	233
1043	MH816128	p:Proteobacteria	f:Bdellovibrionaceae(0.9700)	g:Bdellovibrio(0.9700)	s:Bdellovibrio_bacteriovorus(0.9600)		0	0	0	0	0	17	0	0	0	0	0	0	0	0	0	0	0	0	0	0	0	0	0	0	0	0	0	0	0	0	0	0	0	0	0	0	0	0	0	0	0	0	0
1044	MH816129	p:Actinobacteria	f:Iamiaceae(1.0000)	g:Aquihabitans(1.0000)	s:Aquihabitans_daechungensis(1.0000)		0	4	3	0	0	0	0	0	15	0	0	0	0	0	0	0	14	0	0	0	0	0	0	0	0	0	0	0	0	0	0	0	0	0	0	0	0	0	0	0	0	0	0
1045	MH816130	p:Bacteroidetes	f:Unclassified_Cytophagales(0.9100)	g:Ohtaekwangia(0.6700)	s:Ohtaekwangia_koreensis(0.6700)		0	0	0	0	0	0	0	0	0	0	0	0	0	0	0	0	18	0	0	0	0	0	0	0	0	0	0	0	0	0	0	0	0	0	0	0	0	0	0	0	0	0	0
1046	MH816131	p:Firmicutes	f:Ruminococcaceae(0.6000)	g:Anaerotruncus(0.3600)	s:Anaerotruncus_colihominis(0.3600)		0	0	0	0	0	0	3	0	0	0	0	0	0	0	0	0	0	0	0	0	0	0	0	0	0	0	0	0	0	0	0	0	0	0	0	0	0	0	0	0	0	0	0
1047	MH816132	p:Proteobacteria	f:Rhodospirillaceae(0.3500)	g:Tistrella(0.1500)	s:Tistrella_bauzanensis(0.1400)		0	4	8	0	0	0	0	0	0	0	0	0	0	0	0	0	0	0	0	0	0	0	0	0	0	0	0	0	0	0	0	0	0	0	0	0	0	0	0	0	0	0	0
1048	MH816133	p:Bacteroidetes	f:Porphyromonadaceae(0.1800)	g:Clostridium(0.1000)	s:Porphyromonas_asaccharolytica(0.0500)		0	0	0	0	0	0	0	0	0	14	0	0	0	0	0	0	0	0	0	0	0	0	0	0	0	0	0	0	0	0	0	0	0	0	0	0	0	0	0	0	0	0	0
1050	MH816134	p:Cyanobacteria	f:Oscillatoriales(0.5100)	g:Halospirulina(0.3600)	s:Halospirulina_tapeticola(0.3600)		0	0	0	0	0	0	0	0	0	0	0	0	0	0	0	0	15	4	0	0	0	0	0	0	0	0	0	0	0	0	0	0	0	0	0	0	0	0	0	0	0	0	0
1052	MH816135	p:Planctomycetes	f:Planctomycetaceae(1.0000)	g:Singulisphaera(0.5200)	s:Singulisphaera_acidiphila(0.5000)		0	0	2	0	0	1	0	0	0	4	0	0	0	0	0	9	3	0	0	0	0	0	0	0	0	0	0	0	0	0	0	0	0	0	0	0	0	0	0	0	0	0	0
1053	MH816136	p:Chloroflexi	f:Sphaerobacteraceae(0.5800)	g:Nitrolancea(0.5100)	s:Nitrolancea_hollandica(0.5100)		0	0	0	0	0	0	0	0	0	0	0	0	0	0	0	0	10	0	0	0	0	0	0	0	0	0	0	0	0	0	0	0	0	0	0	0	0	0	0	0	0	0	0
1054	MH816137	p:Actinobacteria	f:Acidimicrobiaceae(0.8600)	g:Ilumatobacter(0.8600)	s:Ilumatobacter_fluminis(0.8500)		0	0	0	0	13	0	0	0	0	0	0	0	0	0	0	0	0	0	0	0	0	0	0	0	0	0	0	0	0	0	0	0	0	0	0	0	0	0	0	0	0	0	0
1055	MH816138	p:Proteobacteria	f:Piscirickettsiaceae(0.2100)	g:Piscirickettsia(0.1900)	s:Piscirickettsia_salmonis(0.1900)		0	0	0	0	0	0	0	0	0	0	0	0	0	0	0	0	19	0	0	0	0	0	0	0	0	0	0	0	0	0	0	0	0	0	0	0	0	0	0	0	0	0	0
1056	MH816139	p:Firmicutes	f:Clostridiaceae(0.7900)	g:Clostridium(0.7600)	s:Clostridium_ganghwense(0.2700)		0	0	0	0	0	0	0	0	0	0	0	0	0	0	0	0	13	0	0	0	0	0	0	0	0	0	0	0	0	0	0	0	0	0	0	0	0	0	0	0	0	0	0
1057	MH816140	p:Proteobacteria	f:Rhodospirillaceae(0.2000)	g:Fodinicurvata(0.2000)	s:Fodinicurvata_fenggangensis(0.1200)		0	0	0	0	13	0	0	0	0	0	0	0	0	0	0	0	0	0	0	0	0	0	0	0	0	0	0	0	0	0	0	0	0	0	0	0	0	0	0	0	0	0	0
1058	MH816141	p:Firmicutes	f:Ruminococcaceae(0.7100)	g:Sporobacter(0.4100)	s:Sporobacter_termitidis(0.4100)		0	0	0	0	0	0	2	0	0	0	0	0	0	0	0	0	0	0	0	0	0	0	0	0	0	0	0	0	0	0	0	0	0	0	0	0	0	0	0	0	0	0	0
1059	MH816142	p:Firmicutes	f:Unclassified_Clostridiales(0.1000)	g:Carboxydothermus(0.0900)	s:Carboxydothermus_hydrogenoformans(0.0500)		0	2	13	0	0	0	0	0	0	0	0	0	0	0	0	0	0	0	0	0	0	0	0	0	0	0	0	0	0	0	0	0	0	0	0	0	0	0	0	0	0	0	0
1060	MH816143	p:Bacteroidetes	f:Flavobacteriaceae(1.0000)	g:Flavobacterium(1.0000)	s:Flavobacterium_hauense(0.7000)		0	0	0	0	0	0	0	5	0	0	18	0	0	0	6	0	0	0	0	0	0	0	0	0	0	0	0	0	0	0	0	0	0	0	0	0	0	0	0	0	0	0	0
1063	MH816144	p:Proteobacteria	f:Rhodospirillaceae(0.5700)	g:Ferrovibrio(0.4700)	s:Ferrovibrio_denitrificans(0.4700)		0	0	0	0	23	0	0	0	0	0	0	0	0	0	0	0	0	0	0	0	0	0	0	0	0	0	0	0	0	0	0	0	0	0	0	0	0	0	0	0	0	0	0
1066	MH816145	p:Actinobacteria	f:Pseudonocardiaceae(0.9800)	g:Amycolatopsis(0.4200)	s:Amycolatopsis_benzoatilytica(0.3400)		0	0	0	0	0	0	0	0	0	0	0	0	9	0	0	0	0	0	0	0	0	0	0	0	0	0	0	0	0	0	0	0	0	0	0	0	0	0	0	0	0	0	0
1068	MH816146	p:Firmicutes	f:Unclassified_Clostridiales(0.8200)	g:Anaerovorax(0.7500)	s:Anaerovorax_odorimutans(0.7500)		0	0	0	0	0	0	4	0	0	0	0	0	0	0	0	0	0	0	0	0	0	0	0	0	0	0	0	0	0	0	0	0	0	0	0	0	0	0	0	0	0	0	0
1070	MH816147	p:Planctomycetes	f:Planctomycetaceae(0.9500)	g:Rhodopirellula(0.9000)	s:Rhodopirellula_baltica(0.5700)		0	0	0	0	0	6	0	0	3	0	7	0	0	0	0	0	0	0	0	0	0	0	0	0	0	0	0	0	0	0	0	0	0	0	0	0	0	0	0	0	0	0	0
1071	MH816148	p:Proteobacteria	f:Hyphomicrobiaceae(0.3100)	g:Anderseniella(0.2000)	s:Anderseniella_baltica(0.2000)		0	0	0	0	0	0	0	0	0	0	0	0	0	0	0	0	17	0	0	0	0	0	0	0	0	0	0	0	0	0	0	0	0	0	0	0	0	0	0	0	0	0	0
1073	MH816149	p:Proteobacteria	f:Nannocystaceae(1.0000)	g:Nannocystis(1.0000)	s:Nannocystis_exedens(1.0000)		0	0	0	0	20	0	0	0	0	0	0	0	0	0	0	0	0	0	0	0	0	0	0	0	0	0	0	0	0	0	0	0	0	0	0	0	0	0	0	0	0	0	0
1074	MH816150	p:Firmicutes	f:Ruminococcaceae(0.4300)	g:Clostridium(0.2600)	s:Anaerotruncus_colihominis(0.1100)		0	0	0	0	0	0	3	0	0	0	0	0	0	0	0	0	0	0	0	0	0	0	0	0	0	0	0	0	0	0	0	0	0	0	0	0	0	0	0	0	0	0	0
1077	MH816151	p:Proteobacteria	f:Rhodobacteraceae(0.9900)	g:Rhodobacter(0.8100)	s:Rhodobacter_blasticus(0.7400)		0	0	0	0	0	15	0	0	0	0	11	0	0	0	0	0	12	0	0	0	0	0	0	0	0	0	0	0	0	0	0	0	0	0	0	0	0	0	0	0	0	0	0
1078	MH816152	p:Bacteroidetes	f:Chitinophagaceae(0.9700)	g:Taibaiella(0.6100)	s:Taibaiella_koreensis(0.4500)		0	0	0	0	0	0	0	0	0	0	0	0	0	0	0	0	0	0	0	0	0	0	0	0	0	0	0	0	0	0	0	0	0	0	0	0	0	0	0	0	0	0	0
1079	MH816153	p:Actinobacteria	f:Acidimicrobiaceae(1.0000)	g:Ilumatobacter(1.0000)	s:Ilumatobacter_fluminis(0.7400)		0	0	0	0	0	11	0	0	3	0	0	0	0	0	0	0	0	0	0	0	0	0	0	0	0	0	0	0	0	0	0	0	0	0	0	0	0	0	0	0	0	0	0
1080	MH816154	p:Bacteroidetes	f:Flavobacteriaceae(1.0000)	g:Chryseobacterium(1.0000)	s:Chryseobacterium_arachidis(0.3600)		0	0	2	0	0	13	0	0	0	4	0	0	0	0	2	89	14	8	0	0	0	0	0	0	0	0	0	0	0	0	0	0	0	0	0	0	0	0	0	0	0	0	0
1081	MH816155	p:Acidobacteria	f:Acidobacteriaceae(0.4200)	g:Chloracidobacterium(0.4000)	s:Chloracidobacterium_thermophilum(0.4000)		0	0	0	0	11	0	0	0	0	0	0	0	0	0	0	0	0	0	0	0	0	0	0	0	0	0	0	0	0	0	0	0	0	0	0	0	0	0	0	0	0	0	0
1082	MH816156	p:Bacteroidetes	f:Flavobacteriaceae(1.0000)	g:Flavobacterium(1.0000)	s:Flavobacterium_terrigena(0.9900)		0	0	2	0	0	0	0	0	0	0	0	0	0	0	0	0	0	0	0	0	0	0	0	0	0	0	0	0	0	0	0	0	0	0	0	0	0	0	0	0	0	0	0
1083	MH816157	p:Bacteroidetes	f:Porphyromonadaceae(0.8700)	g:Odoribacter(0.8600)	s:Odoribacter_denticanis(0.5400)		0	0	0	0	0	0	7	0	0	0	0	0	0	0	0	0	0	0	0	0	0	0	0	0	0	0	0	0	0	0	0	0	0	0	0	0	0	0	0	0	0	0	0
1085	MH816158	p:Proteobacteria	f:Oxalobacteraceae(0.6300)	g:Herbaspirillum(0.5400)	s:Herbaspirillum_massiliense(0.4900)		0	3	3	0	0	1	0	0	1	0	12	0	0	0	0	0	22	0	0	0	0	0	0	0	0	0	0	0	0	0	0	0	0	0	0	0	0	0	0	0	0	0	0
1086	MH816159	p:Acidobacteria	f:Acidobacteriaceae(1.0000)	g:Granulicella(0.9900)	s:Granulicella_sapmiensis(0.8000)		0	0	0	0	0	0	5	0	0	0	0	0	0	0	0	0	0	0	0	0	0	0	0	0	0	0	0	0	0	0	0	0	0	0	0	0	0	0	0	0	0	0	0
1087	MH816160	p:Proteobacteria	f:Nevskiaceae(0.9300)	g:Steroidobacter(0.9300)	s:Steroidobacter_denitrificans(0.7900)		0	0	0	0	0	0	0	0	4	0	0	0	0	0	0	0	0	0	0	0	0	0	0	0	0	0	0	0	0	0	0	0	0	0	0	0	0	0	0	0	0	0	0
1088	MH816161	p:Proteobacteria	f:Desulfobulbaceae(0.2300)	g:Desulfoprunum(0.1300)	s:Desulfoprunum_benzoelyticum(0.1300)		0	1	1	0	0	0	0	0	0	0	0	0	0	0	0	0	10	0	0	0	0	0	0	0	0	0	0	0	0	0	0	0	0	0	0	0	0	0	0	0	0	0	0
1089	MH816162	p:Fusobacteria	f:Leptotrichiaceae(1.0000)	g:Leptotrichia(0.7600)	s:Leptotrichia_goodfellowii(0.4400)		0	0	0	0	0	0	3	0	0	0	0	0	0	0	0	0	0	0	0	0	0	0	0	0	0	0	0	0	0	0	0	0	0	0	0	0	0	0	0	0	0	0	0
1090	MH816163	p:Planctomycetes	f:Planctomycetaceae(1.0000)	g:Planctopirus(0.7100)	s:Planctopirus_limnophila(0.7100)		0	0	0	0	0	13	0	0	0	0	0	0	0	0	0	0	0	0	0	0	0	0	0	0	0	0	0	0	0	0	0	0	0	0	0	0	0	0	0	0	0	0	0
1091	MH816164	p:Firmicutes	f:Eubacteriaceae(0.1200)	g:Eubacterium(0.1100)	s:Eubacterium_brachy(0.0800)		0	0	0	0	0	0	0	0	0	0	0	0	0	0	0	0	7	0	0	0	0	0	0	0	0	0	0	0	0	0	0	0	0	0	0	0	0	0	0	0	0	0	0
1093	MH816165	p:Firmicutes	f:Streptococcaceae(0.3400)	g:Lactococcus(0.2400)	s:Lactococcus_piscium(0.1300)		0	0	0	0	0	15	0	0	0	0	0	0	0	0	0	0	0	0	0	0	0	0	0	0	0	0	0	0	0	0	0	0	0	0	0	0	0	0	0	0	0	0	0
1094	MH816166	p:Cyanobacteria	f:Chroococcales(0.3300)	g:Chalicogloea(0.3300)	s:Chalicogloea_cavernicola(0.3300)		0	0	0	0	0	0	0	0	0	0	0	0	0	9	0	0	0	0	0	0	0	0	0	0	0	0	0	0	0	0	0	0	0	0	0	0	0	0	0	0	0	0	0
1097	MH816167	p:Chlamydiae	f:Parachlamydiaceae(0.9900)	g:Parachlamydia(0.9100)	s:Parachlamydia_acanthamoebae(0.9100)		0	0	0	0	0	0	0	0	0	0	0	0	0	0	0	0	0	8	0	0	0	0	0	0	0	0	0	0	0	0	0	0	0	0	0	0	0	0	0	0	0	0	0
1098	MH816168	p:Proteobacteria	f:Sphingomonadaceae(0.9900)	g:Novosphingobium(0.9900)	s:Novosphingobium_arabidopsis(0.7600)		0	1	1	0	0	0	0	0	0	0	0	74	3	0	0	0	30	0	0	0	0	0	0	0	0	0	0	0	0	0	0	0	0	0	0	0	0	0	0	0	0	0	0
1100	MH816169	p:Firmicutes	f:Ruminococcaceae(1.0000)	g:Ruminococcus(1.0000)	s:Ruminococcus_bromii(1.0000)		0	0	0	0	0	0	3	0	0	0	0	0	0	0	0	0	0	0	0	0	0	0	0	0	0	0	0	0	0	0	0	0	0	0	0	0	0	0	0	0	0	0	0
1101	MH816170	p:Acidobacteria	f:Acidobacteriaceae(1.0000)	g:Granulicella(0.8800)	s:Granulicella_aggregans(0.3600)		0	0	0	0	0	0	3	0	0	0	0	0	0	0	0	0	0	0	0	0	0	0	0	0	0	0	0	0	0	0	0	0	0	0	0	0	0	0	0	0	0	0	0
1103	MH816171	p:Proteobacteria	f:Acetobacteraceae(1.0000)	g:Roseomonas(1.0000)	s:Roseomonas_gilardii_subsp._gilardii(1.0000)		0	0	0	0	0	0	0	0	0	0	15	0	0	0	0	0	0	0	0	0	0	0	0	0	0	0	0	0	0	0	0	0	0	0	0	0	0	0	0	0	0	0	0
1104	MH816172	p:Fusobacteria	f:Leptotrichiaceae(1.0000)	g:Leptotrichia(1.0000)	s:Leptotrichia_hofstadii(0.9100)		0	0	0	0	0	6	0	0	0	0	14	0	0	0	0	0	0	0	0	0	0	0	0	0	0	0	0	0	0	6	0	0	0	0	0	0	0	0	0	0	0	0	0
1105	MH816173	p:Actinobacteria	f:Solirubrobacteraceae(0.5100)	g:Solirubrobacter(0.5100)	s:Solirubrobacter_ginsenosidimutans(0.3100)		0	0	0	0	0	0	6	0	0	0	0	0	0	0	0	0	0	0	0	0	0	0	0	0	0	0	0	0	0	0	0	0	0	0	0	0	0	0	0	0	0	0	0
1107	MH816174	p:Spirochaetes	f:Leptospiraceae(0.1500)	g:Leptospira(0.1500)	s:Constrictibacter_antarcticus(0.0800)		1	0	7	0	0	5	1	0	0	0	0	0	0	0	0	0	0	0	0	0	0	0	0	0	0	0	0	0	0	0	0	0	0	0	0	0	0	0	0	0	0	0	0
1108	MH816175	p:Firmicutes	f:Ruminococcaceae(0.6100)	g:Ruminococcus(0.2500)	s:Faecalibacterium_prausnitzii(0.1500)		0	0	0	0	0	0	2	0	0	0	0	0	0	0	0	0	0	0	0	0	0	0	0	0	0	0	0	0	0	0	0	0	0	0	0	0	0	0	0	0	0	0	0
1109	MH816176	p:Firmicutes	f:Unclassified_Clostridiales(1.0000)	g:Anaerococcus(1.0000)	s:Anaerococcus_octavius(0.8500)		0	0	0	0	0	0	5	0	0	0	0	0	0	7	0	0	0	0	0	0	0	0	0	0	0	0	0	0	0	0	0	0	0	0	0	0	0	0	0	0	0	0	0
1110	MH816177	p:Firmicutes	f:Lachnospiraceae(1.0000)	g:Oribacterium(1.0000)	s:Oribacterium_sinus(0.5000)		0	0	0	0	0	0	0	0	0	0	0	0	0	0	0	0	0	0	0	0	0	0	0	0	0	0	0	0	0	0	0	0	0	0	0	0	0	0	0	0	0	0	0
1111	MH816178	p:Bacteroidetes	f:Sphingobacteriaceae(1.0000)	g:Pedobacter(0.9700)	s:Pedobacter_silvilitoris(0.7000)		0	0	0	0	0	0	0	0	0	0	0	0	0	0	0	0	12	0	0	0	0	0	0	0	0	0	0	0	0	0	0	0	0	0	0	0	8	0	0	0	0	0	0
1112	MH816179	p:Proteobacteria	f:Comamonadaceae(0.0800)	g:Spiroplasma(0.0700)	s:Cardiobacterium_hominis(0.0500)		0	0	0	0	0	0	0	0	0	0	0	0	0	0	0	0	11	0	0	0	0	0	0	0	0	0	0	0	0	0	0	0	0	0	0	0	0	0	0	0	0	0	0
1114	MH816180	p:Actinobacteria	f:Nocardiaceae(0.9400)	g:Smaragdicoccus(0.9300)	s:Smaragdicoccus_niigatensis(0.9300)		0	0	0	0	0	0	0	0	0	0	0	0	0	0	7	0	0	0	0	0	0	0	0	0	0	0	0	0	0	0	0	3	0	0	0	0	0	0	0	0	0	0	0
1115	MH816181	p:Actinobacteria	f:Dermacoccaceae(0.9900)	g:Kytococcus(0.9900)	s:Kytococcus_sedentarius(0.8800)		0	0	0	0	0	0	2	0	0	0	0	0	0	0	0	0	0	0	0	0	0	0	0	0	0	0	0	0	0	0	0	0	0	0	0	0	0	0	0	0	0	0	0
1116	MH816182	p:Firmicutes	f:Eubacteriaceae(0.8400)	g:Anaerofustis(0.7500)	s:Anaerofustis_stercorihominis(0.7500)		0	0	0	0	0	0	4	0	0	0	0	0	0	0	0	0	0	0	0	0	0	0	0	0	0	0	0	0	0	0	0	0	0	0	0	0	0	0	0	0	0	0	0
1117	MH816183	p:Nitrospirae	f:Nitrospiraceae(0.1800)	g:Leptospirillum(0.1600)	s:Leptospirillum_ferriphilum(0.1400)		0	0	0	0	0	0	0	0	0	0	0	0	9	0	0	0	0	0	0	0	0	0	0	0	0	0	0	0	0	0	0	0	0	0	0	0	0	0	0	0	0	0	0
1118	MH816184	p:Proteobacteria	f:Hyphomicrobiaceae(0.1800)	g:Rhodomicrobium(0.1500)	s:Rhodomicrobium_udaipurense(0.1300)		0	0	0	0	0	0	0	0	0	0	0	0	0	0	0	0	0	0	0	0	0	0	0	0	0	0	0	0	0	0	0	0	0	0	0	0	0	0	0	0	0	0	0
1119	MH816185	p:Proteobacteria	f:Rhodospirillaceae(0.6000)	g:Fodinicurvata(0.2100)	s:Fodinicurvata_halophila(0.1600)		0	0	0	0	0	0	0	0	0	0	0	0	0	0	0	0	11	0	0	0	0	0	0	0	0	0	0	0	0	0	0	0	0	0	0	0	0	0	0	0	0	0	0
1121	MH816186	p:Proteobacteria	f:Caulobacteraceae(1.0000)	g:Caulobacter(1.0000)	s:Caulobacter_profundus(0.9600)		0	3	0	0	0	0	2	0	0	0	0	0	0	0	0	0	0	0	0	0	0	0	0	0	0	0	0	0	0	0	0	0	0	0	0	0	0	0	0	0	0	0	0
1123	MH816187	p:Actinobacteria	f:Nocardioidaceae(1.0000)	g:Nocardioides(0.9800)	s:Nocardioides_endophyticus(0.7500)		0	1	1	0	0	0	2	0	0	0	0	0	0	2	0	0	0	0	0	0	0	0	0	0	0	0	0	0	0	0	0	0	0	0	0	0	0	0	0	0	0	0	0
1124	MH816188	p:Actinobacteria	f:Iamiaceae(0.5600)	g:Aquihabitans(0.5300)	s:Aquihabitans_daechungensis(0.5300)		0	0	0	0	0	0	0	0	0	0	0	0	0	0	0	0	0	0	0	0	0	0	0	0	0	0	0	0	0	0	0	0	0	0	0	0	0	0	0	0	0	0	0
1125	MH816189	p:Actinobacteria	f:Conexibacteraceae(0.9400)	g:Conexibacter(0.9400)	s:Conexibacter_arvalis(0.7300)		0	0	0	0	0	0	2	0	0	0	0	0	0	0	0	0	0	0	0	0	0	0	0	0	0	0	0	0	0	0	0	0	0	0	0	0	0	0	0	0	0	0	0
1126	MH816190	p:Proteobacteria	f:Rhodospirillaceae(0.8800)	g:Magnetospirillum(0.5600)	s:Magnetospirillum_gryphiswaldense(0.4700)		0	0	0	0	0	0	2	0	0	0	0	0	0	0	0	0	0	0	0	0	0	0	0	0	0	0	0	0	0	0	0	0	0	0	0	0	0	0	0	0	0	0	0
1128	MH816191	p:Actinobacteria	f:Microbacteriaceae(1.0000)	g:Gryllotalpicola(1.0000)	s:Gryllotalpicola_daejeonensis(1.0000)		0	0	0	0	0	0	3	0	0	0	0	0	0	0	0	0	0	0	0	0	0	0	0	0	0	0	0	0	0	0	0	0	0	0	0	0	0	0	0	0	0	0	0
1129	MH816192	p:Proteobacteria	f:Unclassified_Rhodospirillales(1.0000)	g:Reyranella(1.0000)	s:Reyranella_graminifolii(0.8500)		0	0	0	0	0	0	0	0	0	0	0	0	0	0	0	11	0	0	0	0	0	0	0	0	0	0	0	0	0	0	0	0	0	0	0	0	0	0	0	0	0	0	0
1130	MH816193	p:Bacteroidetes	f:Flavobacteriaceae(0.8100)	g:Flavobacterium(0.6700)	s:Flavobacterium_spartansii(0.1600)		0	0	0	0	0	0	0	0	0	0	0	0	0	0	0	0	25	0	0	0	0	0	0	0	0	0	0	0	0	0	0	0	0	0	0	0	0	0	0	0	0	0	0
1131	MH816194	p:Chlamydiae	f:Simkaniaceae(0.5600)	g:Simkania(0.5600)	s:Simkania_negevensis(0.5600)		0	0	0	0	0	0	0	0	0	0	0	0	0	9	0	0	0	0	0	0	0	0	0	0	0	0	0	0	0	0	0	0	0	0	0	0	0	0	0	0	0	0	0
1132	MH816195	p:Actinobacteria	f:Eggerthellaceae(0.3900)	g:Atopobium(0.2400)	s:Atopobium_deltae(0.1900)		0	0	0	0	0	0	0	0	0	0	0	0	0	0	0	0	0	0	0	0	0	0	0	0	0	0	0	0	0	0	0	0	0	0	0	0	0	0	0	0	0	0	0
1133	MH816196	p:Chlamydiae	f:Parachlamydiaceae(0.6600)	g:Neochlamydia(0.3500)	s:Neochlamydia_hartmannellae(0.3500)		0	0	0	0	0	0	0	0	0	0	0	0	0	0	8	0	0	0	0	0	0	0	0	0	0	0	0	0	0	0	0	0	0	0	0	0	0	0	0	0	0	0	0
1135	MH816197	p:Proteobacteria	f:Rhodospirillaceae(0.5400)	g:Stella(0.3800)	s:Stella_humosa(0.3400)		0	0	0	0	0	0	0	0	0	0	0	0	0	0	0	0	0	0	0	0	0	0	0	0	0	0	0	0	0	0	0	0	0	0	0	0	0	0	0	0	0	0	0
1137	MH816198	p:Proteobacteria	f:Neisseriaceae(0.1600)	g:Aquaspirillum(0.1600)	s:Aquaspirillum_polymorphum(0.1600)		0	0	0	0	0	0	0	0	0	0	0	0	0	0	0	0	24	0	0	0	0	0	0	0	0	0	0	0	0	0	0	0	0	0	0	0	0	0	0	0	0	0	0
1138	MH816199	p:Proteobacteria	f:Halomonadaceae(0.0800)	g:Desulfovibrio(0.0500)	s:Desulfovibrio_oxyclinae(0.0300)		0	0	0	0	0	0	6	0	0	0	0	0	0	0	0	0	0	0	0	0	0	0	0	0	0	0	0	0	0	0	0	0	0	0	0	0	0	0	0	0	0	0	0
1140	MH816200	p:Actinobacteria	f:Brevibacteriaceae(1.0000)	g:Brevibacterium(1.0000)	s:Brevibacterium_paucivorans(0.5200)		0	0	0	0	0	0	2	0	0	0	0	0	0	0	0	0	0	0	0	0	0	0	0	0	0	0	0	0	0	0	0	0	0	0	0	0	0	0	0	0	0	0	0
1141	MH816201	p:Proteobacteria	f:Nevskiaceae(0.9800)	g:Alkanibacter(0.5700)	s:Alkanibacter_difficilis(0.5700)		0	4	9	0	0	13	0	0	0	0	0	0	7	0	0	0	0	0	0	0	0	0	0	0	0	0	0	0	0	0	0	0	0	0	0	0	0	0	0	0	0	0	0
1142	MH816202	p:Actinobacteria	f:Iamiaceae(0.6400)	g:Iamia(0.4700)	s:Iamia_majanohamensis(0.4700)		0	0	0	0	0	0	0	0	0	0	0	0	0	0	8	0	0	0	0	0	0	0	0	0	0	0	0	0	0	0	0	0	0	0	0	0	0	0	0	0	0	0	0
1144	MH816203	p:Proteobacteria	f:Rhodospirillaceae(1.0000)	g:Skermanella(1.0000)	s:Skermanella_aerolata(1.0000)		0	0	0	0	0	0	0	0	0	0	0	0	0	0	8	0	0	0	0	0	0	0	0	0	0	0	0	0	0	0	0	0	0	0	0	0	0	0	0	0	0	0	0
1146	MH816204	p:Bacteroidetes	f:Porphyromonadaceae(0.8300)	g:Dysgonomonas(0.6900)	s:Dysgonomonas_macrotermitis(0.5300)		0	0	0	0	0	0	2	0	0	0	0	0	0	0	0	0	0	0	0	0	0	0	0	0	0	0	0	0	0	0	0	0	0	0	0	0	0	0	0	0	0	0	0
1147	MH816205	p:Firmicutes	f:Unclassified_Clostridiales(0.4300)	g:Blautia(0.4300)	s:Blautia_glucerasea(0.2600)		0	0	0	0	0	0	4	0	0	0	0	0	0	0	0	0	0	0	0	0	0	0	0	0	0	0	0	0	0	0	0	0	0	0	0	0	0	0	0	0	0	0	0
1148	MH816206	p:Proteobacteria	f:Oxalobacteraceae(0.9000)	g:Janthinobacterium(0.5700)	s:Janthinobacterium_agaricidamnosum(0.5700)		0	0	0	0	0	0	0	0	0	15	0	0	0	0	0	0	0	0	0	0	0	0	0	0	0	0	0	0	0	0	0	0	0	0	0	0	0	0	0	0	0	0	0
1149	MH816207	p:Actinobacteria	f:Nocardioidaceae(1.0000)	g:Marmoricola(0.8200)	s:Marmoricola_aequoreus(0.7200)		0	0	0	0	0	0	3	0	0	0	2	0	10	0	6	0	0	0	0	0	0	0	0	0	0	0	0	0	0	0	0	0	0	0	0	0	0	0	0	0	0	0	0
1151	MH816208	p:Firmicutes	f:Bacillaceae(0.1000)	g:Bacillus(0.0700)	s:Alkalibacterium_olivapovliticus(0.0200)		0	0	0	0	0	0	0	0	0	0	9	0	0	0	0	0	0	0	0	0	0	0	0	0	0	0	0	0	0	0	0	0	0	0	0	0	0	0	0	0	0	0	0
1152	MH816209	p:Proteobacteria	f:Polyangiaceae(0.2900)	g:Chondromyces(0.0900)	s:Labilithrix_luteola(0.0900)		0	0	0	0	0	8	0	0	0	0	0	0	0	0	0	0	0	0	0	0	0	0	0	0	0	0	0	0	0	0	0	0	0	0	0	0	0	0	0	0	0	0	0
1157	MH816210	p:Firmicutes	f:Bacillaceae(1.0000)	g:Geobacillus(0.9900)	s:Geobacillus_stearothermophilus(0.9700)		0	0	0	0	0	0	3	0	0	0	0	0	0	0	0	0	0	0	0	0	0	0	0	0	0	0	0	0	0	0	0	0	0	0	0	0	0	0	0	0	0	0	0
1158	MH816211	p:Bacteroidetes	f:Saprospiraceae(0.7400)	g:Lewinella(0.4400)	s:Haliscomenobacter_hydrossis(0.2500)		0	0	0	0	0	0	0	0	13	0	0	0	0	0	0	0	0	0	0	0	0	0	0	0	0	0	0	0	0	0	0	0	0	0	0	0	0	0	0	0	0	0	0
1159	MH816212	p:Actinobacteria	f:Nakamurellaceae(0.3400)	g:Nakamurella(0.3400)	s:Acidothermus_cellulolyticus(0.1700)		0	0	0	0	0	0	0	0	0	0	0	0	0	0	0	0	0	0	0	0	0	0	0	0	1	0	0	0	0	0	0	0	0	0	0	0	0	0	0	0	0	0	0
1161	MH816213	p:Proteobacteria	f:Comamonadaceae(0.4900)	g:Leptothrix(0.2700)	s:Leptothrix_mobilis(0.2700)		0	0	0	0	0	0	0	0	0	0	10	2	0	0	0	0	0	0	0	0	0	0	0	0	0	0	0	0	0	0	0	0	0	0	0	0	0	0	0	0	0	0	0
1163	MH816214	p:Planctomycetes	f:Planctomycetaceae(1.0000)	g:Singulisphaera(0.4500)	s:Singulisphaera_rosea(0.4500)		0	0	0	0	0	0	0	0	7	0	0	0	0	0	0	0	0	0	0	0	0	0	0	0	0	0	0	0	0	0	0	0	0	0	0	0	0	0	0	0	0	0	0
1166	MH816215	p:Actinobacteria	f:Corynebacteriaceae(1.0000)	g:Corynebacterium(1.0000)	s:Corynebacterium_auriscanis(1.0000)		0	0	0	0	0	0	0	0	0	0	0	0	0	0	0	0	0	0	0	0	0	0	0	0	0	0	0	0	0	0	0	0	0	0	0	0	0	0	0	0	0	0	0
1167	MH816216	p:Firmicutes	f:Clostridiaceae(0.1900)	g:Clostridium(0.1800)	s:Clostridium_bifermentans(0.1200)		0	0	1	0	0	0	0	0	0	0	0	0	0	0	0	0	11	0	0	0	0	0	0	0	0	0	0	0	0	0	0	0	0	0	0	0	0	0	0	0	0	0	0
1169	MH816217	p:Proteobacteria	f:Ectothiorhodospiraceae(0.3400)	g:Marinobacterium(0.1800)	s:Marinobacterium_coralli(0.1800)		0	0	0	0	19	0	0	0	0	0	0	0	0	0	0	0	0	0	0	0	0	0	0	0	0	0	0	0	0	0	0	0	0	0	0	0	0	0	0	0	0	0	0
1170	MH816218	p:Firmicutes	f:Veillonellaceae(0.9900)	g:Propionispira(0.3100)	s:Mitsuokella_jalaludinii(0.2600)		0	0	0	0	0	0	2	0	0	0	0	0	0	0	0	0	0	0	0	0	0	0	0	0	0	0	0	0	0	0	0	0	0	0	0	0	0	0	0	0	0	0	0
1171	MH816219	p:Proteobacteria	f:Sphingomonadaceae(1.0000)	g:Novosphingobium(1.0000)	s:Novosphingobium_fuchskuhlense(1.0000)		0	0	9	0	0	0	3	0	0	0	0	0	0	0	0	0	0	0	0	0	0	0	0	0	0	0	0	0	0	0	0	0	0	0	0	0	0	0	0	0	0	0	0
1172	MH816220	p:Firmicutes	f:Clostridiaceae(0.2800)	g:Clostridium(0.2100)	s:Clostridium_chartatabidum(0.0700)		0	0	0	0	0	0	0	0	0	0	0	0	0	0	0	0	15	0	0	0	0	0	0	0	0	0	0	0	0	0	0	0	0	0	0	0	0	0	0	0	0	0	0
1173	MH816221	p:Proteobacteria	f:Bradyrhizobiaceae(0.3500)	g:Rhodoplanes(0.3200)	s:Rhodoplanes_piscinae(0.2000)		0	0	0	0	0	8	1	0	0	0	0	0	0	0	0	0	10	4	0	0	0	0	0	0	0	0	0	0	0	0	0	0	0	0	0	0	0	0	0	0	0	0	0
1174	MH816222	p:Planctomycetes	f:Planctomycetaceae(0.9900)	g:Rhodopirellula(0.5200)	s:Pirellula_staleyi(0.2900)		0	0	0	0	0	0	0	0	0	0	0	0	0	0	0	0	12	4	0	0	0	0	0	0	0	0	0	0	0	0	0	0	0	0	0	0	0	0	0	0	0	0	0
1175	MH816223	p:Bacteroidetes	f:Sphingobacteriaceae(0.4000)	g:Solitalea(0.3800)	s:Solitalea_koreensis(0.3700)		0	0	0	0	0	13	0	0	0	0	0	0	0	0	0	0	0	0	0	0	0	0	0	0	0	0	0	0	0	0	0	0	0	0	0	0	0	0	0	0	0	0	0
1176	MH816224	p:Proteobacteria	f:Succinivibrionaceae(0.1300)	g:Anaerobiospirillum(0.1000)	s:Anaerobiospirillum_thomasii(0.1000)		0	0	0	0	0	0	0	0	7	0	0	0	0	0	0	0	0	0	0	0	0	0	0	0	0	0	0	0	0	0	0	0	0	0	0	0	0	0	0	0	0	0	0
1177	MH816225	p:Bacteroidetes	f:Bacteroidaceae(0.1100)	g:Bacteroides(0.1100)	s:Bacteroides_cellulosilyticus(0.0600)		0	0	0	0	0	0	0	0	0	0	0	0	0	0	0	0	9	0	0	0	0	0	0	0	0	0	0	0	0	0	0	0	0	0	0	0	0	0	0	0	0	0	0
1178	MH816226	p:Planctomycetes	f:Planctomycetaceae(1.0000)	g:Planctopirus(0.4000)	s:Planctopirus_limnophila(0.4000)		0	0	0	0	0	0	0	0	0	11	0	0	0	0	0	0	0	0	0	0	0	0	0	0	0	0	0	0	0	0	0	0	0	0	0	0	0	0	0	0	0	0	0
1179	MH816227	p:Acidobacteria	f:Acidobacteriaceae(1.0000)	g:Acidobacterium(0.6600)	s:Acidobacterium_capsulatum(0.6600)		0	0	0	0	9	0	1	0	0	0	0	0	0	0	0	0	0	0	0	0	0	0	0	0	0	0	0	0	0	0	0	0	0	0	0	0	0	0	0	0	0	0	0
1180	MH816228	p:Proteobacteria	f:Rhodospirillaceae(0.6500)	g:Roseomonas(0.2600)	s:Roseomonas_aestuarii(0.2600)		0	0	0	0	0	0	0	0	0	0	0	0	0	0	0	0	0	8	0	0	0	0	0	0	0	0	0	0	0	0	0	0	0	0	0	0	0	0	0	0	0	0	0
1181	MH816229	p:Bacteroidetes	f:Sphingobacteriaceae(0.9900)	g:Pedobacter(0.7400)	s:Pedobacter_hartonius(0.4400)		0	0	0	0	0	0	0	0	0	0	0	0	0	0	0	0	0	5	0	0	0	0	0	0	0	0	0	0	0	0	0	0	0	0	0	0	0	0	0	0	0	0	0
1182	MH816230	p:Proteobacteria	f:Xanthobacteraceae(0.9500)	g:Starkeya(0.6900)	s:Starkeya_koreensis(0.6900)		0	0	5	0	0	0	0	0	0	0	0	0	0	0	0	0	0	0	0	0	0	0	0	0	0	0	0	0	0	0	0	0	0	0	0	0	0	0	0	0	0	0	0
1183	MH816231	p:Actinobacteria	f:Coriobacteriaceae(1.0000)	g:Collinsella(1.0000)	s:Collinsella_aerofaciens(0.9700)		0	0	0	0	0	0	0	0	0	0	0	0	6	0	0	0	0	0	0	0	0	0	0	0	0	0	0	0	0	0	0	0	0	0	0	0	0	0	0	0	0	0	0
1184	MH816232	p:Proteobacteria	f:Halomonadaceae(1.0000)	g:Cobetia(1.0000)	s:Cobetia_amphilecti(1.0000)		0	0	0	0	0	0	0	0	0	0	0	0	0	0	0	0	11	0	0	0	0	0	0	0	0	0	0	0	0	0	0	0	0	0	0	0	0	0	0	0	0	0	0
1187	MH816233	p:Proteobacteria	f:Alcaligenaceae(0.1500)	g:Achromobacter(0.1400)	s:Achromobacter_aegrifaciens(0.0900)		0	0	0	0	0	0	0	0	0	0	0	0	11	0	0	0	0	0	0	0	0	0	0	0	0	0	0	0	0	0	0	0	0	0	0	0	0	0	0	0	0	0	0
1189	MH816234	p:Proteobacteria	f:Comamonadaceae(0.7200)	g:Curvibacter(0.4100)	s:Curvibacter_fontanus(0.4100)		0	0	0	0	0	5	0	0	12	0	0	0	0	0	0	0	5	0	0	1	0	0	0	0	0	0	0	0	0	0	0	0	0	0	0	0	0	0	0	0	0	0	0
1190	MH816235	p:Firmicutes	f:Paenibacillaceae(1.0000)	g:Paenibacillus(1.0000)	s:Paenibacillus_alvei(0.9900)		0	0	0	0	0	0	3	0	0	0	0	0	0	0	0	0	0	0	0	0	0	0	0	0	0	0	0	0	0	0	0	0	0	0	0	0	0	0	0	0	0	0	0
1191	MH816236	p:Firmicutes	f:Unclassified_Clostridiales(0.4500)	g:Tissierella(0.4000)	s:Tissierella_carlieri(0.4000)		0	0	0	0	0	6	0	0	0	0	0	0	0	0	0	0	0	0	0	0	0	0	0	0	0	0	0	0	0	0	0	0	0	0	0	0	0	0	0	0	0	0	0
1192	MH816237	p:Firmicutes	f:Veillonellaceae(0.9900)	g:Dialister(0.9500)	s:Dialister_invisus(0.7300)		0	0	0	0	0	0	0	0	0	0	0	0	0	0	0	0	0	13	0	0	0	0	0	0	0	0	0	0	0	0	0	0	0	0	0	0	0	0	0	0	0	0	0
1196	MH816238	p:Firmicutes	f:Ruminococcaceae(0.4000)	g:Acetivibrio(0.2200)	s:Acetivibrio_cellulolyticus(0.2200)		0	0	0	0	0	0	2	0	0	0	0	0	0	0	0	0	0	0	0	0	0	0	0	0	0	0	0	0	0	0	0	0	0	0	0	0	0	0	0	0	0	0	0
1197	MH816239	p:Proteobacteria	f:Rhodospirillaceae(0.3600)	g:Anderseniella(0.1900)	s:Anderseniella_baltica(0.1900)		0	0	0	0	0	10	0	0	0	0	0	0	0	0	0	0	0	0	0	0	0	0	0	0	0	0	0	0	0	0	0	0	0	0	0	0	0	0	0	0	0	0	0
1198	MH816240	p:Proteobacteria	f:Caulobacteraceae(0.8300)	g:Caulobacter(0.3200)	s:Caulobacter_daechungensis(0.1900)		0	0	0	0	0	0	3	0	0	0	0	0	0	0	0	0	0	0	0	0	0	0	0	0	0	0	0	0	0	0	0	0	0	0	0	0	0	0	0	0	0	0	0
1200	MH816241	p:Gemmatimonadetes	f:Gemmatimonadaceae(1.0000)	g:Gemmatimonas(1.0000)	s:Gemmatimonas_aurantiaca(1.0000)		0	0	0	0	0	0	0	0	0	0	7	0	0	0	0	0	0	0	0	0	0	0	0	0	0	0	0	0	0	0	0	0	0	0	0	0	0	0	0	0	0	0	0
1201	MH816242	p:Proteobacteria	f:Rhodanobacteraceae(0.6200)	g:Rudaea(0.6100)	s:Rudaea_cellulosilytica(0.6100)		0	0	0	0	0	0	0	0	0	0	11	0	0	1	0	0	0	0	0	0	0	0	0	0	0	0	0	0	0	0	0	0	0	0	0	0	0	0	0	0	0	0	0
1203	MH816243	p:Proteobacteria	f:Alcaligenaceae(0.1500)	g:Basilea(0.0500)	s:Basilea_psittacipulmonis(0.0500)		0	0	0	0	0	0	0	0	0	0	7	0	0	0	0	0	0	0	0	0	0	0	0	0	0	0	0	0	0	0	0	0	0	0	0	0	0	0	0	0	0	0	0
1205	MH816244	p:Firmicutes	f:Unclassified_Clostridiales(0.1400)	g:Fusibacter(0.1200)	s:Fusibacter_tunisiensis(0.0900)		0	3	6	0	0	0	0	0	0	0	0	0	0	0	0	0	0	0	0	0	0	0	0	0	0	0	0	0	0	0	0	0	0	0	0	0	0	0	0	0	0	0	0
1206	MH816245	p:Firmicutes	f:Bacillaceae(0.3100)	g:Bacillus(0.2600)	s:Bacillus_beveridgei(0.0600)		0	0	0	0	0	0	0	0	0	0	0	0	0	8	0	0	0	0	0	0	0	0	0	0	0	0	0	0	0	0	0	0	0	0	0	0	0	0	0	0	0	0	0
1208	MH816246	p:Bacteroidetes	f:Flavobacteriaceae(1.0000)	g:Vitellibacter(0.9500)	s:Vitellibacter_nionensis(0.9500)		0	0	0	0	12	0	0	0	0	0	0	0	4	0	0	0	0	0	0	0	0	0	0	0	0	0	0	0	0	0	0	0	0	0	0	0	0	0	0	0	0	0	0
1210	MH816247	p:Bacteroidetes	f:Chitinophagaceae(0.5200)	g:Asinibacterium(0.2500)	s:Asinibacterium_lactis(0.2500)		0	0	0	0	0	0	0	0	0	0	0	0	0	0	7	0	0	0	0	0	0	0	0	0	0	0	0	0	0	0	0	0	0	0	0	0	0	0	0	0	0	0	0
1211	MH816248	p:Proteobacteria	f:Comamonadaceae(0.9900)	g:Acidovorax(0.7400)	s:Acidovorax_delafieldii(0.4800)		0	0	0	0	0	0	0	0	0	0	0	0	0	0	0	0	19	0	0	0	0	0	0	0	0	0	0	0	0	0	0	0	0	0	0	0	0	0	0	0	0	0	0
1212	MH816249	p:Actinobacteria	f:Iamiaceae(0.9900)	g:Aquihabitans(0.9900)	s:Aquihabitans_daechungensis(0.9900)		0	0	0	0	0	0	0	0	0	0	0	0	0	0	5	0	0	0	0	0	0	0	0	0	0	0	0	0	0	0	0	0	0	0	0	0	0	0	0	0	0	0	0
1213	MH816250	p:Firmicutes	f:Eubacteriaceae(1.0000)	g:Eubacterium(1.0000)	s:Eubacterium_infirmum(1.0000)		0	0	0	0	0	0	3	0	0	0	0	0	0	0	0	0	0	0	0	0	0	0	0	0	0	0	0	0	0	0	0	0	0	0	0	0	0	0	0	0	0	0	0
1214	MH816251	p:Bacteroidetes	f:Bacteroidaceae(1.0000)	g:Bacteroides(1.0000)	s:Bacteroides_cellulosilyticus(0.4100)		0	0	0	0	0	0	3	0	0	0	0	0	0	0	0	0	0	0	0	0	0	0	0	0	0	0	0	0	0	0	0	0	0	0	0	0	0	0	0	0	0	0	0
1219	MH816252	p:Bacteroidetes	f:Chitinophagaceae(1.0000)	g:Flavisolibacter(0.4700)	s:Flavisolibacter_ginsengisoli(0.3300)		0	0	0	0	0	0	0	0	0	0	0	0	0	0	6	0	0	0	0	0	0	0	0	0	0	0	0	0	0	0	0	0	0	0	0	0	0	0	0	0	0	0	0
1220	MH816253	p:Bacteroidetes	f:Cytophagaceae(1.0000)	g:Hymenobacter(1.0000)	s:Hymenobacter_ocellatus(0.7400)		0	0	0	0	0	0	0	0	0	0	0	0	0	6	0	0	0	0	0	0	0	0	0	0	0	0	0	0	0	0	0	0	0	0	0	0	0	0	0	0	0	0	0
1222	MH816254	p:Gemmatimonadetes	f:Gemmatimonadaceae(0.9900)	g:Gemmatimonas(0.9900)	s:Gemmatimonas_aurantiaca(0.9900)		0	0	0	0	0	0	0	0	0	0	0	0	0	0	0	0	11	0	0	0	0	0	0	0	0	0	0	0	0	0	0	0	0	0	0	0	0	0	0	0	0	0	0
1223	MH816255	p:Verrucomicrobia	f:Unclassified_Spartobacteria(0.3300)	g:Limisphaera(0.3300)	s:Limisphaera_ngatamarikiensis(0.3300)		0	0	0	0	0	0	5	0	0	0	0	0	0	0	0	0	0	0	0	0	0	0	0	0	0	0	0	0	0	0	0	0	0	0	0	0	0	0	0	0	0	0	0
1224	MH816256	p:Bacteroidetes	f:Porphyromonadaceae(0.9400)	g:Parabacteroides(0.7300)	s:Parabacteroides_faecis(0.4100)		0	0	0	0	0	0	4	0	0	0	0	0	0	0	0	0	0	0	0	0	0	0	0	0	0	0	0	0	0	0	0	0	0	0	0	0	0	0	0	0	0	0	0
1226	MH816257	p:Acidobacteria	f:Bryobacteraceae	g:Paludibaculum(0.4000)	s:Paludibaculum_fermentans(0.4000)		0	0	0	0	0	0	0	0	0	0	0	0	0	0	0	0	0	0	0	0	0	0	0	0	0	0	0	0	0	0	0	0	0	0	0	0	0	0	0	0	0	0	0
1228	MH816258	p:Bacteroidetes	f:Chitinophagaceae(1.0000)	g:Chitinophaga(0.6900)	s:Sediminibacterium_ginsengisoli(0.2200)		0	0	0	0	0	0	0	0	0	0	0	0	0	0	0	0	0	0	0	0	0	0	0	0	0	0	0	0	0	0	0	0	0	0	0	0	0	0	0	0	0	0	0
1229	MH816259	p:Bacteroidetes	f:Porphyromonadaceae(0.9600)	g:Parabacteroides(0.8700)	s:Parabacteroides_chinchillae(0.6200)		0	0	0	0	0	0	74	0	0	0	0	0	0	0	0	0	0	0	0	0	0	0	0	0	0	0	0	0	0	0	0	0	0	0	0	0	0	0	0	0	0	0	0
1230	MH816260	p:Firmicutes	f:Thermodesulfobiaceae(1.0000)	g:Coprothermobacter(1.0000)	s:Coprothermobacter_proteolyticus(1.0000)		0	0	0	0	0	8	1	0	0	0	0	0	0	0	0	0	0	0	0	0	0	0	0	0	0	0	0	0	0	0	0	0	0	0	0	0	0	0	0	0	0	0	0
1231	MH816261	p:Proteobacteria	f:Neisseriaceae(0.0900)	g:Aquaspirillum(0.0900)	s:Aquaspirillum_putridiconchylium(0.0800)		0	0	0	0	0	0	0	0	0	0	0	0	9	0	0	0	0	0	0	0	0	0	0	0	0	0	0	0	0	0	0	0	0	0	0	0	0	0	0	0	0	0	0
1232	MH816262	p:Proteobacteria	f:Nitrosomonadaceae(0.4600)	g:Nitrosospira(0.4500)	s:Nitrosospira_multiformis(0.3100)		0	0	0	0	0	0	0	0	0	0	0	0	7	0	0	0	0	0	0	0	0	0	0	0	0	0	0	0	0	0	0	0	0	0	0	0	0	0	0	0	0	0	0
1233	MH816263	p:Firmicutes	f:Veillonellaceae(0.1400)	g:Carboxydothermus(0.1100)	s:Heliorestis_baculata(0.0700)		0	0	0	0	0	0	3	0	0	0	0	0	0	0	0	0	0	0	0	0	0	0	0	0	0	0	0	0	0	0	0	0	0	0	0	0	0	0	0	0	0	0	0
1239	MH816264	p:Chloroflexi	f:Caldilineaceae(0.8900)	g:Litorilinea(0.7800)	s:Litorilinea_aerophila(0.7800)		0	0	0	0	0	0	0	0	0	0	13	0	0	0	0	0	0	0	0	0	0	0	0	0	0	0	0	0	0	0	0	0	0	0	0	0	0	0	0	0	0	0	0
1240	MH816265	p:Proteobacteria	f:Methylococcaceae(1.0000)	g:Methylomonas(1.0000)	s:Methylomonas_methanica(0.9900)		0	0	0	0	0	0	0	0	0	0	0	0	0	0	0	0	0	0	0	0	0	0	0	0	0	0	0	0	0	3	0	0	0	0	0	0	0	0	0	0	0	0	0
1243	MH816266	p:Verrucomicrobia	f:Verrucomicrobiaceae(0.9000)	g:Haloferula(0.5400)	s:Haloferula_rosea(0.3300)		0	0	0	0	0	0	0	0	0	0	0	0	0	0	0	0	0	0	0	0	0	0	0	0	0	0	0	0	0	8	0	0	0	0	0	0	0	0	0	0	0	0	0
1244	MH816267	p:Bacteroidetes	f:Porphyromonadaceae(0.9800)	g:Parabacteroides(0.9300)	s:Parabacteroides_chinchillae(0.4900)		0	0	0	0	0	17	678	0	0	0	0	0	0	3	0	0	0	0	0	0	0	0	0	0	0	0	0	0	0	0	0	0	0	0	0	0	0	0	0	0	0	1	0
1245	MH816268	p:Proteobacteria	f:Rhodospirillaceae(0.1200)	g:Desertibacter(0.1200)	s:Dissulfuribacter_thermophilus(0.1200)		0	1	2	0	0	0	0	0	0	0	9	0	0	0	0	0	0	0	0	0	0	0	0	0	0	0	0	0	0	0	0	0	0	0	0	0	0	0	0	0	0	0	0
1246	MH816269	p:Bacteroidetes	f:Prolixibacteraceae(0.2600)	g:Mangrovibacterium(0.2100)	s:Mangrovibacterium_diazotrophicum(0.2100)		0	0	0	0	0	5	0	0	0	0	0	0	0	0	0	0	0	0	0	0	0	0	0	0	0	0	0	0	0	0	0	0	0	0	0	0	0	0	0	0	0	0	0
1247	MH816270	p:Proteobacteria	f:Moraxellaceae(0.3300)	g:Acinetobacter(0.3000)	s:Acinetobacter_rudis(0.0700)		0	0	0	0	0	0	0	0	0	0	15	0	0	0	0	0	0	0	0	0	0	0	0	0	0	0	0	0	0	0	0	0	0	0	0	0	0	0	0	0	0	0	0
1248	MH816271	p:Bacteroidetes	f:Chitinophagaceae(1.0000)	g:Flavisolibacter(0.4200)	s:Flavisolibacter_ginsengisoli(0.3000)		0	0	0	0	0	0	0	0	0	0	11	0	0	0	0	0	0	0	0	0	0	0	0	0	0	0	0	0	0	0	0	0	0	0	0	0	0	0	0	0	0	0	0
1249	MH816272	p:Proteobacteria	f:Hyphomicrobiaceae(1.0000)	g:Pelagibacterium(1.0000)	s:Pelagibacterium_halotolerans(1.0000)		0	0	0	0	0	0	0	0	0	0	0	0	0	0	5	0	0	0	0	0	0	0	0	0	0	0	0	0	0	0	0	0	0	0	0	0	0	0	0	0	0	0	0
1250	MH816273	p:Firmicutes	f:Eubacteriaceae(0.1100)	g:Eubacterium(0.1000)	s:Eubacterium_brachy(0.0700)		0	0	0	0	0	0	0	0	4	0	0	0	0	0	0	0	15	0	0	0	0	0	0	0	0	0	0	0	0	0	0	0	0	0	0	0	0	0	0	0	0	0	0
1252	MH816274	p:Proteobacteria	f:Idiomarinaceae(0.3000)	g:Idiomarina(0.2900)	s:Idiomarina_abyssalis(0.1800)		0	0	0	0	0	0	4	0	0	0	0	0	0	0	0	0	0	0	0	0	0	0	0	0	0	0	0	0	0	0	0	0	0	0	0	0	0	0	0	0	0	0	0
1253	MH816275	p:Proteobacteria	f:Brucellaceae(1.0000)	g:Ochrobactrum(0.9600)	s:Ochrobactrum_daejeonense(0.4500)		0	0	0	0	0	0	3	0	0	0	0	0	0	0	0	0	0	0	0	0	2	0	0	0	0	0	0	0	0	0	0	0	0	0	0	0	0	0	0	0	0	0	0
1254	MH816276	p:Bacteroidetes	f:Rikenellaceae(0.8500)	g:Alistipes(0.7200)	s:Alistipes_finegoldii(0.4200)		0	0	0	0	0	0	3	0	0	0	0	0	0	0	0	0	0	0	0	0	0	0	0	0	0	0	0	0	0	0	0	0	0	0	0	0	0	0	0	0	0	0	0
1255	MH816277	p:Proteobacteria	f:Aeromonadaceae(0.2500)	g:Aeromonas(0.1600)	s:Aeromonas_aquariorum(0.0800)		0	0	0	0	0	0	0	0	0	0	14	0	0	0	0	0	0	0	0	0	0	0	0	0	0	0	0	0	0	0	0	0	0	0	0	0	0	0	0	0	0	0	0
1256	MH816278	p:Firmicutes	f:Eubacteriaceae(0.1500)	g:Aminicella(0.1000)	s:Aminicella_lysinilytica(0.1000)		0	0	0	0	10	0	3	0	0	0	0	0	0	0	0	0	0	0	0	0	0	0	0	0	0	0	0	0	0	0	0	0	0	0	0	0	0	0	0	0	0	0	0
1258	MH816279	p:Planctomycetes	f:Tepidisphaeraceae(0.5300)	g:Tepidisphaera(0.5300)	s:Tepidisphaera_mucosa(0.5300)		0	0	0	0	0	8	0	0	0	0	0	0	0	0	0	0	0	6	0	0	0	0	0	0	0	0	0	0	0	0	0	0	0	0	0	0	0	0	0	0	0	0	0
1261	MH816280	p:Planctomycetes	f:Planctomycetaceae(0.9900)	g:Aquisphaera(0.6200)	s:Aquisphaera_giovannonii(0.6200)		0	0	0	0	0	0	0	0	0	0	9	0	0	0	0	0	0	0	0	0	0	0	0	0	0	0	0	0	0	0	0	0	0	0	0	0	0	0	0	0	0	0	0
1264	MH816281	p:Planctomycetes	f:Planctomycetaceae(1.0000)	g:Aquisphaera(0.9700)	s:Aquisphaera_giovannonii(0.9700)		0	1	2	1	0	0	0	0	0	0	0	0	0	0	0	0	0	0	0	0	0	0	0	0	0	0	0	0	0	0	0	0	0	0	0	0	0	0	0	0	0	0	0
1265	MH816282	p:Proteobacteria	f:Beijerinckiaceae(0.9900)	g:Camelimonas(0.9900)	s:Camelimonas_lactis(0.7100)		0	1	0	0	0	0	0	0	0	9	0	0	0	0	0	0	0	0	0	0	0	0	0	0	0	0	0	0	0	0	0	0	0	0	0	0	0	0	0	0	0	0	0
1266	MH816283	p:Bacteroidetes	f:Chitinophagaceae(1.0000)	g:Terrimonas(0.4200)	s:Terrimonas_lutea(0.2200)		0	0	0	0	0	0	0	0	0	0	11	0	0	0	0	0	0	0	0	0	0	0	0	0	0	0	0	0	0	0	0	0	0	0	0	0	0	0	0	0	0	0	0
1267	MH816284	p:Cyanobacteria	f:Nostocales(0.9600)	g:Halotia(0.9600)	s:Halotia_branconii(0.8200)		0	0	0	0	0	0	0	0	0	0	10	0	0	0	0	0	0	0	0	0	0	0	0	0	0	0	0	0	0	0	0	0	0	0	0	0	0	0	0	0	0	0	0
1269	MH816285	p:Proteobacteria	f:Legionellaceae(0.5300)	g:Legionella(0.5300)	s:Legionella_adelaidensis(0.1900)		0	0	0	0	0	7	0	0	0	0	0	0	0	0	0	0	0	0	0	0	0	0	0	0	0	0	0	0	0	0	0	0	0	0	0	0	0	0	0	0	0	0	0
1271	MH816286	p:Bacteroidetes	f:Cytophagaceae(0.8800)	g:Hymenobacter(0.4400)	s:Hymenobacter_antarcticus(0.1900)		0	0	0	0	0	0	0	0	0	0	0	0	0	0	7	0	0	0	0	0	0	0	0	0	0	0	0	0	0	0	0	0	0	0	0	0	0	0	0	0	0	0	0
1273	MH816287	p:Firmicutes	f:Unclassified_Clostridiales(0.1300)	g:Desulfovibrio(0.0800)	s:Aquiflexum_balticum(0.0600)		0	0	0	0	0	9	0	0	0	0	0	0	0	0	0	0	0	0	0	0	0	0	0	0	0	0	0	0	0	0	0	0	0	0	0	0	0	0	0	0	0	0	0
1274	MH816288	p:Firmicutes	f:Alicyclobacillaceae(0.1100)	g:Alicyclobacillus(0.1100)	s:Cardiobacterium_hominis(0.1100)		0	0	0	0	0	0	0	0	7	0	0	0	0	0	0	0	0	0	0	0	0	0	0	0	0	0	0	0	0	0	0	0	0	0	0	0	0	0	0	0	0	0	0
1275	MH816289	p:Planctomycetes	f:Tepidisphaeraceae(0.8500)	g:Tepidisphaera(0.8500)	s:Tepidisphaera_mucosa(0.8500)		0	0	0	0	0	0	0	0	8	0	0	0	0	0	0	0	0	0	0	0	0	0	0	0	0	0	0	0	0	0	0	0	0	0	0	0	0	0	0	0	0	0	0
1276	MH816290	p:Bacteroidetes	f:Cytophagaceae(1.0000)	g:Hymenobacter(1.0000)	s:Hymenobacter_arcticus(0.8000)		0	0	0	0	0	0	6	0	0	0	0	0	0	0	0	0	0	0	0	0	0	0	0	0	0	0	0	0	0	0	0	0	0	0	0	0	0	0	0	2	0	0	0
1277	MH816291	p:Firmicutes	f:Clostridiaceae(0.6300)	g:Clostridium(0.5400)	s:Clostridium_lactatifermentans(0.2400)		0	0	0	0	0	0	2	0	0	0	0	0	0	0	0	0	0	0	0	0	0	0	0	0	0	0	0	0	0	0	0	0	0	0	0	0	0	0	0	0	0	0	0
1281	MH816292	p:Bacteroidetes	f:Chitinophagaceae(1.0000)	g:Chitinophaga(1.0000)	s:Chitinophaga_arvensicola(0.4000)		0	0	0	0	0	0	2	0	0	0	0	0	0	0	0	0	0	0	0	0	0	0	0	0	0	0	0	0	0	0	0	0	0	0	0	0	0	0	0	0	0	0	0
1284	MH816293	p:Firmicutes	f:Bacillaceae(0.1900)	g:Bacillus(0.0900)	s:Desulfonema_limicola(0.0700)		0	0	0	0	0	0	0	0	0	0	0	0	0	0	0	0	0	0	0	0	0	0	0	0	0	0	0	0	0	0	0	0	0	0	0	0	0	0	0	0	0	0	0
1285	MH816294	p:Crenarchaeota	f:Sulfolobaceae(0.0700)	g:Aeromicrobium(0.0500)	s:Acidilobus_aceticus(0.0400)		0	0	0	0	0	0	0	0	0	0	0	0	0	0	0	0	0	0	0	0	0	0	0	0	0	0	0	0	0	0	0	5	0	0	0	0	0	0	0	0	0	0	0
1286	MH816295	p:Proteobacteria	f:Rhizobiaceae(1.0000)	g:Rhizobium(1.0000)	s:Rhizobium_herbae(0.6300)		0	2	6	0	0	0	0	0	0	0	0	0	3	0	0	0	0	0	0	0	0	0	0	0	0	0	0	0	0	4	0	0	0	0	0	0	0	0	0	0	0	0	0
1288	MH816296	p:Firmicutes	f:Eubacteriaceae(0.1300)	g:Geobacter(0.1200)	s:Aminicella_lysinilytica(0.0800)		0	0	0	0	0	0	0	0	0	0	0	0	0	0	0	0	7	0	0	0	0	0	0	0	0	0	0	0	0	0	0	0	0	0	0	0	0	0	0	0	0	0	0
1294	MH816297	p:Proteobacteria	f:Rhodobacteraceae(0.9900)	g:Gemmobacter(0.6000)	s:Gemmobacter_aquaticus(0.2700)		0	0	0	0	0	0	0	0	0	0	0	0	0	0	0	0	0	0	0	0	0	0	0	0	0	0	0	0	0	0	0	0	0	0	0	0	0	0	0	0	0	0	0
1296	MH816298	p:Proteobacteria	f:Erythrobacteraceae(0.9900)	g:Porphyrobacter(0.7500)	s:Porphyrobacter_colymbi(0.7500)		0	0	0	0	0	0	0	0	0	0	0	0	0	0	0	0	7	0	0	0	0	0	0	0	0	0	0	0	0	0	0	0	0	0	0	0	0	0	0	0	0	0	0
1297	MH816299	p:Deinococcus-Thermus	f:Deinococcaceae(0.1400)	g:Deinococcus(0.1400)	s:Aureimonas_frigidaquae(0.1100)		0	0	0	0	0	0	0	0	3	0	0	0	0	0	0	0	0	0	0	0	1	0	0	0	0	0	0	0	0	0	0	0	0	0	0	0	0	0	0	0	0	0	0
1298	MH816300	p:Firmicutes	f:Eubacteriaceae(0.9100)	g:Eubacterium(0.9100)	s:Eubacterium_dolichum(0.9100)		0	0	0	0	0	0	0	0	0	0	0	0	12	0	0	0	0	0	0	0	0	0	0	0	0	0	0	0	0	0	0	0	0	0	0	0	0	0	0	0	0	0	0
1299	MH816301	p:Actinobacteria	f:Tsukamurellaceae(1.0000)	g:Tsukamurella(1.0000)	s:Tsukamurella_inchonensis(0.6200)		0	0	0	0	0	0	3	0	0	0	0	0	0	0	0	0	0	0	0	0	0	0	0	0	0	0	0	0	0	0	0	0	0	0	0	0	0	0	0	0	0	0	0
1302	MH816302	p:Actinobacteria	f:Corynebacteriaceae(1.0000)	g:Corynebacterium(1.0000)	s:Corynebacterium_matruchotii(0.7900)		0	0	0	0	87	3	1	0	0	0	0	1	0	0	0	0	0	0	0	0	0	0	0	0	1	0	0	0	0	0	0	0	0	0	0	0	0	0	0	0	0	0	0
1303	MH816303	p:Firmicutes	f:Leuconostocaceae(1.0000)	g:Leuconostoc(0.8800)	s:Leuconostoc_mesenteroides_subsp._cremoris(0.4700)		0	0	0	0	0	0	2	0	0	0	0	1	0	0	0	0	0	0	0	0	0	0	0	0	0	0	0	0	0	0	0	0	0	0	0	0	0	0	0	0	0	0	0
1304	MH816304	p:Firmicutes	f:Lactobacillaceae(1.0000)	g:Lactobacillus(1.0000)	s:Lactobacillus_delbrueckii_subsp._bulgaricus(1.0000)		0	0	0	0	0	0	10	0	0	0	0	0	0	1	0	0	0	0	0	0	0	0	0	0	0	0	0	0	0	0	0	0	0	0	0	0	0	0	0	1	0	0	0
1305	MH816305	p:Cyanobacteria	f:Oscillatoriales(0.5600)	g:Halospirulina(0.4900)	s:Halospirulina_tapeticola(0.4900)		0	0	0	0	0	0	2	0	0	0	0	0	0	0	0	0	0	0	0	0	0	0	0	0	0	0	0	0	0	0	0	0	0	0	0	0	0	0	0	0	0	0	0
1306	MH816306	p:Proteobacteria	f:Rhodocyclaceae(0.4600)	g:Azoarcus(0.3700)	s:Azoarcus_communis(0.3300)		0	0	0	0	0	0	2	0	0	0	0	0	0	0	0	0	0	0	0	0	0	0	0	0	0	0	0	0	0	0	0	0	0	0	0	0	0	0	0	0	0	0	0
1308	MH816307	p:Proteobacteria	f:Vibrionaceae(1.0000)	g:Photobacterium(0.9800)	s:Photobacterium_aquimaris(0.6200)		0	0	0	0	0	0	3	0	0	0	0	0	0	0	0	0	0	0	0	0	0	0	0	0	0	0	0	0	0	0	0	0	0	0	0	0	0	0	0	0	0	0	0
1309	MH816308	p:Proteobacteria	f:Ectothiorhodospiraceae(0.4900)	g:Thioalkalivibrio(0.3900)	s:Thioalkalivibrio_versutus(0.1900)		0	0	4	0	0	0	0	0	0	0	0	0	0	0	0	0	0	0	0	0	0	0	0	0	0	0	0	0	0	0	0	0	0	0	0	0	0	0	0	0	0	0	0
1311	MH816309	p:Proteobacteria	f:Aeromonadaceae(0.4400)	g:Aeromonas(0.4100)	s:Aeromonas_aquariorum(0.2100)		0	0	0	0	0	0	2	0	0	0	0	0	0	0	0	0	0	0	0	0	0	0	0	0	0	0	0	0	0	0	0	0	0	0	0	0	0	0	0	0	0	0	0
1312	MH816310	p:Proteobacteria	f:Rhodobacteraceae(0.3600)	g:Parvularcula(0.1200)	s:Parvularcula_lutaonensis(0.1100)		0	0	0	0	0	0	0	0	6	0	0	0	0	0	0	0	0	0	0	0	0	0	0	0	0	0	0	0	0	0	0	0	0	0	0	0	0	0	0	0	0	0	0
1313	MH816311	p:Firmicutes	f:Clostridiaceae(0.8000)	g:Clostridium(0.7600)	s:Clostridium_sporosphaeroides(0.5800)		0	0	0	0	0	0	2	0	0	0	0	0	0	0	0	0	0	0	0	0	0	0	0	0	0	0	0	0	0	0	0	0	0	0	0	0	0	0	0	0	0	0	0
1314	MH816312	p:Firmicutes	f:Peptococcaceae(0.1300)	g:Desulfotomaculum(0.1300)	s:Abiotrophia_defectiva(0.1000)		0	0	0	0	0	0	0	0	0	0	0	0	0	0	0	0	0	0	0	0	0	0	0	0	0	0	0	0	0	8	0	0	0	0	0	0	0	0	0	0	0	0	0
1315	MH816313	p:Firmicutes	f:Ruminococcaceae(0.7900)	g:Anaerotruncus(0.4900)	s:Anaerotruncus_colihominis(0.4900)		0	0	0	0	0	0	2	0	0	0	0	0	0	0	0	0	0	0	0	0	0	0	0	0	0	0	0	0	0	0	0	0	0	0	0	0	0	0	0	0	0	0	0
1317	MH816314	p:Proteobacteria	f:Sphingomonadaceae(0.9900)	g:Novosphingobium(0.9600)	s:Novosphingobium_taihuense(0.6800)		0	5	10	0	0	0	0	0	0	0	0	0	0	0	0	0	0	0	0	0	1	0	0	0	0	0	0	0	0	0	0	0	0	0	0	0	0	0	0	0	0	0	0
1319	MH816315	p:Proteobacteria	f:Moraxellaceae(1.0000)	g:Acinetobacter(1.0000)	s:Acinetobacter_calcoaceticus(0.9800)		0	1	0	0	0	0	14	0	0	28	0	0	12	0	0	0	137	0	0	1	0	1	2	0	0	0	0	0	0	0	0	0	0	0	0	0	0	0	0	0	0	0	0
1320	MH816316	p:Bacteroidetes	f:Chitinophagaceae(1.0000)	g:Flavitalea(0.4100)	s:Flavitalea_gansuensis(0.3600)		0	0	0	0	0	0	0	0	0	0	0	0	0	4	0	0	0	0	0	0	0	0	0	0	0	0	0	0	0	0	0	0	0	0	0	0	0	0	0	0	0	0	0
1322	MH816317	p:Bacteroidetes	f:Flavobacteriaceae(0.1400)	g:Flavobacterium(0.0700)	s:Chrysiogenes_arsenatis(0.0300)		0	0	0	0	0	0	0	0	0	0	0	8	0	0	0	0	0	0	0	0	0	0	0	0	0	0	0	0	0	0	0	0	0	0	0	0	0	0	0	0	0	0	0
1324	MH816318	p:Proteobacteria	f:Desulfonatronaceae(0.4700)	g:Desulfonatronum(0.4700)	s:Desulfonatronum_cooperativum(0.2600)		0	0	0	0	0	0	0	0	0	0	0	0	0	0	0	0	0	0	0	0	0	0	0	0	0	0	0	0	0	7	0	0	0	0	0	0	0	0	0	0	0	0	0
1325	MH816319	p:Spirochaetes	f:Leptospiraceae(0.1000)	g:Leptospira(0.1000)	s:Leptospira_biflexa(0.0800)		0	0	0	0	0	0	0	0	0	0	0	0	0	0	0	0	0	0	0	0	0	0	0	0	0	0	0	0	0	5	0	0	0	0	0	0	0	0	0	0	0	0	0
1326	MH816320	p:Firmicutes	f:Clostridiaceae(0.2300)	g:Eubacterium(0.1900)	s:Eubacterium_yurii_subsp._margaretiae(0.1800)		0	0	0	0	0	0	0	0	0	0	0	0	0	0	0	0	0	0	0	0	0	0	0	0	0	0	0	0	0	6	0	0	0	0	0	0	0	0	0	0	0	0	0
1328	MH816321	p:Proteobacteria	f:Halothiobacillaceae(0.1700)	g:Halothiobacillus(0.1700)	s:Halothiobacillus_kellyi(0.1700)		0	0	0	0	0	0	3	0	0	0	0	0	0	0	0	0	0	0	0	0	0	0	0	0	0	0	0	0	0	0	0	0	0	0	0	0	0	0	0	0	0	0	0
1329	MH816322	p:Deinococcus-Thermus	f:Deinococcaceae(1.0000)	g:Deinococcus(1.0000)	s:Deinococcus_apachensis(0.6800)		0	0	0	0	13	0	0	0	0	0	0	0	0	0	0	0	0	0	0	0	0	0	0	0	0	0	0	0	0	0	0	0	0	0	0	0	0	0	0	0	0	0	0
1332	MH816323	p:Firmicutes	f:Unclassified_Clostridiales(0.2600)	g:Acetoanaerobium(0.2300)	s:Acetoanaerobium_noterae(0.2300)		0	0	0	0	0	0	2	0	0	0	0	0	0	0	0	0	0	0	0	0	0	0	0	0	0	0	0	0	0	0	0	0	0	0	0	0	0	0	0	0	0	0	0
1333	MH816324	p:Proteobacteria	f:Idiomarinaceae(0.1100)	g:Aliidiomarina(0.1100)	s:Aliidiomarina_shirensis(0.1100)		0	0	0	0	13	0	0	0	0	0	0	0	0	0	0	0	0	0	0	0	0	0	0	0	0	0	0	0	0	0	0	0	0	0	0	0	0	0	0	0	0	0	0
1334	MH816325	p:Proteobacteria	f:Halobacteriovoracaceae(0.7900)	g:Halobacteriovorax(0.7900)	s:Halobacteriovorax_litoralis(0.6700)		0	0	0	0	0	5	0	0	0	0	0	0	0	0	0	0	0	0	0	0	0	0	0	0	0	0	0	0	0	0	0	0	0	0	0	0	0	0	0	0	0	0	0
1335	MH816326	p:Proteobacteria	f:Sphingomonadaceae(0.2500)	g:Altererythrobacter(0.1900)	s:Altererythrobacter_namhicola(0.0800)		0	0	0	0	0	4	0	0	0	0	0	0	0	0	0	0	0	0	0	0	0	0	0	0	1	0	0	0	0	0	0	0	0	0	0	0	0	0	0	0	0	0	0
1337	MH816327	p:Bacteroidetes	f:Porphyromonadaceae(0.9600)	g:Porphyromonas(0.6500)	s:Porphyromonas_catoniae(0.5100)		0	0	0	0	0	0	0	0	0	0	0	0	0	0	0	0	0	4	0	1	0	0	0	0	0	0	0	0	0	0	0	0	0	0	0	0	0	0	0	0	0	0	0
1339	MH816328	p:Actinobacteria	f:Microbacteriaceae(0.2300)	g:Streptomyces(0.1100)	s:Amycolatopsis_cihanbeyliensis(0.0500)		0	0	0	0	0	0	2	0	0	0	0	0	0	0	0	0	0	0	0	0	0	0	0	0	0	0	0	0	0	0	0	0	0	0	0	0	0	0	0	0	0	0	0
1341	MH816329	p:Bacteroidetes	f:Chitinophagaceae(1.0000)	g:Hydrotalea(0.4200)	s:Hydrotalea_flava(0.4200)		0	0	0	0	0	0	0	0	4	0	0	0	0	0	0	0	0	0	0	0	0	0	0	0	0	0	0	0	0	0	0	0	0	0	0	0	0	0	0	0	0	0	0
1343	MH816330	p:Actinobacteria	f:Microbacteriaceae(0.2400)	g:Iamia(0.2300)	s:Iamia_majanohamensis(0.2300)		0	0	0	0	0	0	3	0	0	0	0	0	0	0	0	0	0	0	0	0	0	0	0	0	0	0	0	0	0	0	0	0	0	0	0	0	0	0	0	0	0	0	0
1347	MH816331	p:Actinobacteria	f:Actinomycetaceae(1.0000)	g:Actinomyces(1.0000)	s:Actinomyces_odontolyticus(0.9000)		0	0	0	0	29	0	6	0	0	0	14	0	0	0	0	0	22	0	0	0	0	0	0	0	0	0	0	0	0	0	0	0	0	1	0	0	0	0	0	0	0	0	0
1348	MH816332	p:Proteobacteria	f:Nevskiaceae(1.0000)	g:Hydrocarboniphaga(1.0000)	s:Hydrocarboniphaga_effusa(1.0000)		0	0	0	0	0	0	0	0	0	0	8	0	0	0	0	0	0	0	0	0	0	0	0	0	0	0	0	0	0	0	0	0	0	0	0	0	0	0	0	0	0	0	0
1349	MH816333	p:Firmicutes	f:Eubacteriaceae(0.1200)	g:Eubacterium(0.0800)	s:Corynebacterium_caspium(0.0500)		0	0	0	0	0	0	0	0	5	0	0	0	0	0	0	0	0	0	0	0	0	0	0	0	0	0	0	0	0	0	0	0	0	0	0	0	0	0	0	0	0	0	0
1350	MH816334	p:Firmicutes	f:Paenibacillaceae(1.0000)	g:Cohnella(1.0000)	s:Cohnella_damuensis(0.5400)		0	0	0	0	0	0	4	0	0	0	0	0	0	0	0	0	0	0	0	1	0	0	0	0	0	0	0	0	0	0	0	0	0	0	0	0	0	0	0	0	0	0	0
1351	MH816335	p:Acidobacteria	f:Unclassified_Elusimicrobia(0.5200)	g:Aridibacter(0.3500)	s:Aridibacter_famidurans(0.3500)		0	0	0	0	0	0	0	0	0	4	0	0	0	0	0	0	0	0	0	0	0	0	0	0	0	0	0	0	0	0	0	0	0	0	0	0	0	0	0	0	0	0	0
1352	MH816336	p:Proteobacteria	f:Bdellovibrionaceae(0.2800)	g:Vampirovibrio(0.2800)	s:Vampirovibrio_chlorellavorus(0.2800)		0	0	0	0	0	0	0	0	10	0	0	0	0	0	0	0	0	0	0	0	0	0	0	0	0	0	0	0	0	0	0	0	0	0	0	0	0	0	0	0	0	0	0
1353	MH816337	p:Planctomycetes	f:Planctomycetaceae(0.9900)	g:Gemmata(0.8600)	s:Gemmata_obscuriglobus(0.8600)		0	0	0	0	0	0	0	0	6	0	0	0	0	0	0	0	0	0	0	0	0	0	0	0	0	0	0	0	0	0	0	0	0	0	0	0	0	0	0	0	0	0	0
1354	MH816338	p:Actinobacteria	f:Streptomycetaceae(1.0000)	g:Streptomyces(0.9700)	s:Streptomyces_achromogenes_subsp._achromogenes(0.9700)		0	0	0	0	0	0	0	0	7	0	0	0	0	0	0	0	0	0	0	0	0	0	0	0	0	0	0	0	0	0	0	0	0	0	0	0	0	0	0	0	0	0	0
1356	MH816339	p:Acidobacteria	f:Acidobacteriaceae(1.0000)	g:Granulicella(0.4800)	s:Granulicella_cerasi(0.4700)		0	0	0	0	0	0	6	0	0	0	0	0	0	0	0	0	0	0	0	0	0	0	0	0	0	0	0	0	0	0	0	0	0	0	0	0	0	0	0	0	0	0	0
1358	MH816340	p:Actinobacteria	f:Corynebacteriaceae(0.3300)	g:Corynebacterium(0.3300)	s:Fimbriimonas_ginsengisoli(0.3200)		0	3	6	0	0	0	0	0	0	0	0	0	0	0	0	0	0	3	0	0	0	0	0	0	0	0	0	0	0	0	0	0	0	0	0	0	0	0	0	0	0	0	0
1359	MH816341	p:Actinobacteria	f:Conexibacteraceae(0.7200)	g:Conexibacter(0.7200)	s:Conexibacter_woesei(0.4600)		0	0	0	0	0	0	0	0	0	0	0	0	0	0	0	0	0	0	0	0	0	0	0	0	0	0	0	0	0	0	0	0	0	0	0	0	0	0	0	0	0	0	0
1360	MH816342	p:Bacteroidetes	f:Sphingobacteriaceae(1.0000)	g:Sphingobacterium(1.0000)	s:Sphingobacterium_nematocida(0.7900)		0	0	0	0	2	0	0	0	0	0	0	0	0	0	0	0	0	0	0	0	0	0	0	1	0	0	0	0	0	0	0	0	0	0	0	0	0	0	0	0	0	0	0
1361	MH816343	p:Proteobacteria	f:Desulfovibrionaceae(0.1100)	g:Desulfovibrio(0.1100)	s:Desulfovibrio_intestinalis(0.1000)		0	0	0	0	0	0	0	0	0	0	0	0	4	0	0	0	0	0	0	0	0	0	0	0	0	0	0	0	0	0	0	0	0	0	0	0	0	0	0	0	0	0	0
1362	MH816344	p:Firmicutes	f:Unclassified_Clostridiales(0.0800)	g:Desulfovibrio(0.0800)	s:Advenella_faeciporci(0.0500)		0	0	0	0	0	0	0	0	0	0	0	0	0	0	0	0	8	0	0	0	0	0	0	0	0	0	0	0	0	0	0	0	0	0	0	0	0	0	0	0	0	0	0
1363	MH816345	p:Firmicutes	f:Thermoanaerobacteraceae(0.2600)	g:Carboxydothermus(0.1500)	s:Syntrophomonas_zehnderi(0.0800)		0	0	0	0	0	10	0	0	0	0	0	0	0	0	0	0	0	0	0	0	0	0	0	0	0	0	0	0	0	0	0	0	0	0	0	0	0	0	0	0	0	0	0
1364	MH816346	p:Proteobacteria	f:Vulgatibacteraceae(0.2300)	g:Vulgatibacter(0.2300)	s:Vulgatibacter_incomptus(0.2300)		0	0	0	0	0	0	0	0	0	0	0	0	0	0	0	0	0	0	0	0	0	0	0	0	0	0	0	0	0	0	0	0	0	0	0	0	0	0	0	0	0	0	0
1366	MH816347	p:Proteobacteria	f:Rhodanobacteraceae(1.0000)	g:Rudaea(1.0000)	s:Rudaea_cellulosilytica(1.0000)		0	0	0	0	0	0	2	0	0	0	0	0	0	0	0	0	0	1	0	0	0	0	0	0	0	0	0	0	0	0	0	0	0	0	0	0	0	0	0	0	0	0	0
1367	MH816348	p:Acidobacteria	f:Bryobacteraceae	g:Paludibaculum(0.8800)	s:Paludibaculum_fermentans(0.8800)		0	0	0	0	0	0	0	0	14	0	0	0	0	0	0	0	0	0	0	0	0	0	0	0	0	0	0	0	0	0	0	0	0	0	0	0	0	0	0	0	0	0	0
1368	MH816349	p:Bacteroidetes	f:Flavobacteriaceae(1.0000)	g:Flavobacterium(1.0000)	s:Flavobacterium_psychrolimnae(0.4900)		0	1	0	0	0	1	0	0	0	0	0	0	0	0	0	0	9	0	0	0	0	0	0	0	0	0	0	0	0	0	0	0	0	0	0	0	0	0	1	0	0	0	0
1373	MH816350	p:Actinobacteria	f:Conexibacteraceae(0.5900)	g:Conexibacter(0.5900)	s:Conexibacter_arvalis(0.4300)		0	0	0	0	0	0	0	0	0	0	0	0	0	0	0	0	0	4	0	0	0	0	0	0	1	0	0	0	0	0	0	0	0	0	0	0	0	0	0	0	0	0	0
1374	MH816351	p:Bacteroidetes	f:Flavobacteriaceae(1.0000)	g:Flavobacterium(0.9900)	s:Flavobacterium_chungnamense(0.1700)		0	2	4	0	0	0	0	0	0	0	0	0	0	0	0	0	0	0	0	0	0	0	0	0	0	0	0	0	0	0	0	0	0	0	0	0	0	0	0	0	0	0	0
1375	MH816352	p:Firmicutes	f:Clostridiaceae(0.5500)	g:Clostridium(0.2900)	s:Lactonifactor_longoviformis(0.2600)		0	0	0	0	0	0	5	0	0	0	0	0	0	0	0	0	0	0	0	0	0	0	0	0	0	0	0	0	0	0	0	0	0	0	0	0	0	0	0	0	0	0	0
1376	MH816353	p:Actinobacteria	f:Mycobacteriaceae(1.0000)	g:Mycobacterium(1.0000)	s:Mycobacterium_florentinum(0.5200)		0	0	0	0	0	0	1	0	0	0	0	0	0	0	0	0	0	4	0	0	0	0	0	0	0	0	0	0	0	0	0	0	0	0	0	0	0	0	0	0	0	0	0
1377	MH816354	p:Proteobacteria	f:Rhodospirillaceae(0.1500)	g:Desulfomonile(0.1000)	s:Aggregicoccus_edonensis(0.0700)		0	0	0	0	0	0	0	0	0	0	0	0	0	0	0	0	0	0	0	0	0	0	0	0	0	0	0	0	0	4	0	0	0	0	0	0	0	0	0	0	0	0	0
1378	MH816355	p:Firmicutes	f:Unclassified_Thermoanaerobacterales(0.1400)	g:Caldicellulosiruptor(0.1300)	s:Abiotrophia_defectiva(0.0900)		0	0	0	0	0	0	0	0	0	0	0	0	0	0	0	0	0	0	0	0	0	0	0	0	0	0	0	0	0	7	0	0	0	0	0	0	0	0	0	0	0	0	0
1379	MH816356	p:Proteobacteria	f:Vibrionaceae(0.2900)	g:Ferrimonas(0.2700)	s:Ferrimonas_gelatinilytica(0.1400)		0	0	0	0	10	0	0	0	0	0	0	0	0	0	0	0	0	0	0	0	0	0	0	0	0	0	0	0	0	0	0	0	0	0	0	0	0	0	0	0	0	0	0
1380	MH816357	p:Proteobacteria	f:Coxiellaceae(1.0000)	g:Diplorickettsia(1.0000)	s:Diplorickettsia_massiliensis(1.0000)		0	0	0	0	0	0	0	0	0	0	0	0	0	0	6	0	0	11	0	0	0	0	0	0	1	0	0	0	0	0	0	0	0	0	0	0	0	0	0	0	0	0	0
1381	MH816358	p:Firmicutes	f:Lachnospiraceae(0.4200)	g:Anaerostipes(0.4200)	s:Natranaerovirga_pectinivora(0.2700)		0	0	0	0	0	0	2	0	0	0	0	0	0	0	0	0	0	0	0	0	0	0	0	0	0	0	0	0	0	0	0	0	0	0	0	0	0	0	0	0	0	0	0
1382	MH816359	p:Proteobacteria	f:Unclassified_Rhodospirillales(1.0000)	g:Reyranella(1.0000)	s:Reyranella_soli(1.0000)		0	0	0	0	0	0	0	0	4	0	0	0	0	0	0	0	0	0	0	0	0	0	0	0	0	0	0	0	0	0	0	0	0	0	0	0	0	0	0	0	0	0	0
1383	MH816360	p:Actinobacteria	f:Dermacoccaceae(0.1000)	g:Branchiibius(0.0900)	s:Branchiibius_cervicis(0.0500)		0	0	0	0	0	0	0	0	0	0	0	0	0	0	0	0	0	0	0	0	0	0	0	0	0	0	0	0	0	5	0	0	0	0	0	0	0	0	1	0	0	0	0
1386	MH816361	p:Bacteroidetes	f:Porphyromonadaceae(1.0000)	g:Porphyromonas(1.0000)	s:Porphyromonas_bennonis(1.0000)		0	0	0	0	0	0	1	0	0	0	0	0	0	0	0	0	0	0	0	0	0	0	0	0	0	0	0	0	0	0	0	0	0	0	1	0	0	0	0	0	0	0	0
1387	MH816362	p:Proteobacteria	f:Succinivibrionaceae(0.1300)	g:Anaerobiospirillum(0.1300)	s:Anaerobiospirillum_succiniciproducens(0.1100)		0	0	0	0	0	0	0	0	2	0	0	0	0	0	0	0	0	2	0	0	0	0	0	0	0	0	0	0	0	0	0	0	0	0	0	0	0	0	0	0	0	0	0
1388	MH816363	p:Proteobacteria	f:Comamonadaceae(1.0000)	g:Variovorax(0.8600)	s:Variovorax_paradoxus(0.5900)		0	5	10	0	0	15	0	0	0	34	10	0	0	0	0	48	0	0	1	0	0	0	0	0	0	0	1	0	0	0	0	1	0	0	0	0	0	0	0	0	0	0	0
1389	MH816364	p:Actinobacteria	f:Microbacteriaceae(0.2500)	g:Agromyces(0.2400)	s:Agromyces_tropicus(0.1400)		0	0	0	0	0	7	0	0	0	0	0	0	0	0	0	0	0	0	0	0	0	0	0	0	0	0	0	0	0	4	0	0	0	0	0	0	0	0	0	0	0	0	0
1390	MH816365	p:Bacteroidetes	f:Flavobacteriaceae(1.0000)	g:Flavobacterium(1.0000)	s:Flavobacterium_ummariense(0.8900)		0	8	27	0	0	0	0	0	0	0	0	0	0	0	0	0	0	0	0	0	0	0	0	0	0	0	0	0	0	0	0	0	0	0	0	0	0	0	0	0	0	0	0
1392	MH816366	p:Proteobacteria	f:Unclassified_Rhizobiales(0.2900)	g:Amorphus(0.2900)	s:Amorphus_suaedae(0.2900)		0	0	0	0	0	0	0	0	0	0	0	0	0	0	0	0	8	0	0	0	0	0	0	0	0	0	0	0	0	0	0	0	0	0	0	0	0	0	0	0	0	0	0
1393	MH816367	p:Proteobacteria	f:Comamonadaceae(0.9800)	g:Pseudorhodoferax(0.9400)	s:Pseudorhodoferax_aquiterrae(0.9400)		0	2	33	0	29	22	1	0	0	0	0	11	0	0	0	0	25	2	0	0	0	0	0	0	0	0	0	0	0	0	0	0	0	0	0	0	0	0	0	0	0	0	0
1394	MH816368	p:Verrucomicrobia	f:Unclassified_Spartobacteria(0.6600)	g:Limisphaera(0.6600)	s:Limisphaera_ngatamarikiensis(0.6600)		0	0	9	0	0	0	0	0	0	0	0	0	0	0	0	0	0	0	0	0	0	0	0	0	0	0	0	0	0	0	0	0	0	0	0	0	0	0	0	0	0	0	0
1395	MH816369	p:Proteobacteria	f:Unclassified_Burkholderiales(0.0600)	g:Aquabacterium(0.0600)	s:Aquabacterium_commune(0.0400)		0	0	0	0	0	0	0	0	5	0	0	0	0	0	0	0	0	0	0	0	0	0	0	0	0	0	0	0	0	0	0	0	0	0	0	0	0	0	0	0	0	0	0
1398	MH816370	p:Firmicutes	f:Leuconostocaceae(0.0800)	g:Mycoplasma(0.0600)	s:Halothiobacillus_halophilus(0.0500)		0	0	0	0	0	0	0	0	0	0	0	0	4	0	0	0	0	0	0	0	0	0	0	0	0	0	0	0	0	0	0	0	0	0	0	0	0	0	0	0	0	0	0
1399	MH816371	p:Chlamydiae	f:Parachlamydiaceae(0.3500)	g:Neochlamydia(0.2800)	s:Neochlamydia_hartmannellae(0.2800)		0	0	0	0	0	0	0	0	0	0	0	0	0	0	0	0	0	0	0	0	0	0	0	0	0	0	0	0	0	6	0	0	0	0	0	0	0	0	0	0	0	0	0
1400	MH816372	p:Planctomycetes	f:Planctomycetaceae(1.0000)	g:Gemmata(1.0000)	s:Gemmata_obscuriglobus(1.0000)		0	0	0	0	0	0	0	0	0	0	0	0	0	0	0	0	0	4	0	0	0	0	0	0	0	0	0	0	0	0	0	0	0	0	0	0	0	0	0	0	0	0	0
1401	MH816373	p:Proteobacteria	f:Vulgatibacteraceae(0.3400)	g:Vulgatibacter(0.3400)	s:Vulgatibacter_incomptus(0.3400)		0	0	0	0	0	0	0	0	0	0	0	0	0	0	0	0	5	0	0	0	0	0	0	0	0	0	0	0	0	0	0	0	0	0	0	0	0	0	0	0	0	0	0
1402	MH816374	p:Bacteroidetes	f:Porphyromonadaceae(0.7300)	g:Butyricimonas(0.7200)	s:Butyricimonas_faecihominis(0.4600)		0	0	0	0	0	0	1	0	0	0	0	0	4	0	0	0	0	0	0	0	0	0	0	0	0	0	0	0	0	0	0	0	0	0	0	0	0	0	0	0	0	0	0
1404	MH816375	p:Firmicutes	f:Clostridiaceae(0.2100)	g:Clostridiisalibacter(0.1100)	s:Clostridiisalibacter_paucivorans(0.1100)		0	0	0	0	0	0	0	0	0	0	0	0	0	0	0	0	0	0	0	0	0	0	0	0	0	0	1	0	0	7	0	0	0	0	0	0	0	0	0	0	0	0	0
1405	MH816376	p:Proteobacteria	f:Rickettsiaceae(0.2200)	g:Rickettsia(0.2200)	s:Rickettsia_aeschlimannii(0.1500)		0	0	0	0	0	0	0	0	0	0	0	0	0	3	0	0	0	0	0	0	0	0	0	0	0	0	0	0	0	0	0	0	0	0	0	0	0	0	0	0	0	0	0
1407	MH816377	p:Bacteroidetes	f:Rikenellaceae(0.8300)	g:Alistipes(0.8100)	s:Alistipes_finegoldii(0.6600)		0	0	0	0	0	0	23	0	0	0	0	0	0	0	0	0	0	0	0	0	0	0	0	0	0	0	0	0	0	0	0	0	0	0	0	0	0	0	0	0	0	0	0
1409	MH816378	p:Bacteroidetes	f:Porphyromonadaceae(0.9500)	g:Parabacteroides(0.7700)	s:Parabacteroides_johnsonii(0.4900)		0	0	0	0	0	5	346	0	0	25	0	0	0	3	0	0	0	0	0	0	0	0	0	0	0	0	0	0	0	0	0	0	0	0	0	0	0	0	0	0	0	0	0
1412	MH816379	p:Proteobacteria	f:Rhodobiaceae(0.7800)	g:Parvibaculum(0.7800)	s:Parvibaculum_lavamentivorans(0.5400)		0	0	0	0	0	0	0	0	4	0	0	0	0	0	0	0	0	0	0	0	0	0	0	0	0	0	0	0	0	0	0	0	0	0	0	0	0	0	0	0	0	0	0
1413	MH816380	p:Bacteroidetes	f:Flavobacteriaceae(1.0000)	g:Flavobacterium(1.0000)	s:Flavobacterium_soli(0.8700)		0	1	3	0	0	0	0	0	4	0	0	0	0	0	0	0	3	0	0	0	0	0	0	0	0	0	0	0	0	0	0	0	0	0	0	0	0	0	0	0	0	0	0
1414	MH816381	p:Firmicutes	f:Lachnospiraceae(0.3700)	g:Blautia(0.1800)	s:Acetitomaculum_ruminis(0.1200)		0	0	0	0	0	0	4	0	0	0	0	0	0	0	0	0	0	0	0	0	0	0	0	0	0	0	0	0	0	0	0	0	0	0	0	0	0	0	0	0	0	0	0
1415	MH816382	p:Chlamydiae	f:Simkaniaceae(0.5200)	g:Simkania(0.5200)	s:Simkania_negevensis(0.5200)		0	0	0	0	0	0	0	0	3	0	0	0	0	0	2	0	0	0	0	0	0	0	0	0	0	0	0	0	0	0	0	0	0	0	0	0	0	0	0	0	0	0	0
1416	MH816383	p:Actinobacteria	f:Nocardiopsaceae(1.0000)	g:Nocardiopsis(0.9900)	s:Nocardiopsis_baichengensis(0.4100)		0	0	0	0	0	0	2	0	0	0	0	0	0	0	0	0	0	0	0	0	0	0	0	0	0	0	0	0	0	0	0	0	0	0	0	0	0	0	0	0	0	0	0
1420	MH816384	p:Proteobacteria	f:Arenicellaceae(0.2700)	g:Arenicella(0.2700)	s:Arenicella_chitinivorans(0.1600)		0	0	0	0	0	0	2	0	0	0	0	0	0	0	0	0	0	0	0	0	0	0	0	0	0	0	0	0	0	0	0	0	0	0	0	0	0	0	0	0	0	0	0
1421	MH816385	p:Firmicutes	f:Clostridiaceae(0.5700)	g:Clostridium(0.2500)	s:Clostridium_purinilyticum(0.2200)		0	0	0	0	0	0	4	0	0	0	0	0	0	0	0	0	0	0	0	0	0	0	0	0	0	0	0	0	0	0	0	0	0	0	0	0	0	0	0	0	0	0	0
1422	MH816386	p:Firmicutes	f:Ruminococcaceae(0.5900)	g:Anaerotruncus(0.5100)	s:Anaerotruncus_colihominis(0.5100)		0	0	0	0	0	0	2	0	0	0	0	0	0	0	0	0	0	0	0	0	0	0	0	0	0	0	0	0	0	0	0	0	0	0	0	0	0	0	0	0	0	0	0
1423	MH816387	p:Firmicutes	f:Peptoniphilaceae(1.0000)	g:Peptoniphilus(1.0000)	s:Peptoniphilus_duerdenii(1.0000)		0	0	0	0	0	0	2	0	0	0	0	0	0	0	0	0	0	0	0	0	0	0	0	0	0	0	0	0	0	0	0	0	0	0	0	0	0	0	0	0	0	0	0
1425	MH816388	p:Proteobacteria	f:Vibrionaceae(0.0600)	g:Enterovibrio(0.0400)	s:Acidiphilium_acidophilum(0.0200)		0	0	0	0	0	0	0	0	0	0	0	0	0	0	0	0	0	0	0	0	0	0	0	0	0	0	0	0	0	0	0	3	0	0	0	0	0	0	0	0	0	0	0
1426	MH816389	p:Proteobacteria	f:Alcanivoracaceae(1.0000)	g:Alcanivorax(1.0000)	s:Alcanivorax_dieselolei(0.7500)		0	0	0	0	0	0	0	0	0	0	0	0	0	0	0	0	12	0	0	0	0	0	0	0	0	0	0	0	0	0	0	0	0	0	0	0	0	0	0	0	0	0	0
1427	MH816390	p:Proteobacteria	f:Sphingomonadaceae(0.8500)	g:Novosphingobium(0.4100)	s:Novosphingobium_hassiacum(0.3300)		0	0	0	0	0	0	0	0	0	0	0	0	0	10	0	0	0	0	0	0	0	0	0	0	0	0	0	0	0	0	0	0	0	0	0	0	0	0	0	0	0	0	0
1429	MH816391	p:Firmicutes	f:Eubacteriaceae(1.0000)	g:Eubacterium(1.0000)	s:Eubacterium_brachy(1.0000)		0	0	0	0	0	0	0	0	0	0	0	0	0	0	0	0	0	0	0	0	0	0	0	0	0	0	0	0	0	0	0	0	0	0	0	0	0	0	0	0	0	0	0
1430	MH816392	p:Proteobacteria	f:Legionellaceae(1.0000)	g:Legionella(1.0000)	s:Legionella_cincinnatiensis(0.3900)		0	0	0	0	39	0	0	0	0	0	0	0	0	0	0	0	4	0	0	0	0	0	0	0	0	0	0	0	0	0	0	0	0	0	0	0	0	0	0	0	0	1	0
1431	MH816393	p:Bacteroidetes	f:Porphyromonadaceae(0.9200)	g:Parabacteroides(0.7900)	s:Parabacteroides_chinchillae(0.5900)		0	0	0	0	0	0	5	0	0	0	0	0	0	0	0	0	0	0	0	0	0	0	0	0	0	0	0	0	0	0	0	0	0	0	0	0	0	0	0	0	0	0	0
1432	MH816394	p:Proteobacteria	f:Bradyrhizobiaceae(1.0000)	g:Tardiphaga(0.6900)	s:Tardiphaga_robiniae(0.6900)		0	1	2	0	0	0	0	0	0	0	12	0	0	0	0	0	0	0	3	0	0	0	0	0	1	1	0	0	0	0	0	0	0	0	0	0	0	0	0	0	0	0	0
1433	MH816395	p:Bacteroidetes	f:Chitinophagaceae(0.2600)	g:Chitinophaga(0.2200)	s:Mariniphaga_anaerophila(0.1300)		0	0	0	0	0	5	0	0	0	0	0	0	0	0	0	0	0	0	0	0	0	0	0	0	0	0	0	0	0	0	0	0	0	0	0	0	0	0	0	0	0	0	0
1438	MH816396	p:Proteobacteria	f:Pseudomonadaceae(1.0000)	g:Pseudomonas(0.9700)	s:Pseudomonas_anguilliseptica(0.9300)		1	163	572	0	131	22	0	3	10	111	28	176	0	2	6	0	33	5	2	1	1	0	0	0	1	0	0	0	0	3	0	0	0	0	0	0	0	0	0	0	0	0	0
1439	MH816397	p:Proteobacteria	f:Nautiliaceae(0.1900)	g:Caminibacter(0.1100)	s:Aquaspirillum_putridiconchylium(0.0800)		0	0	0	0	0	0	0	0	4	0	0	0	0	0	0	0	0	0	0	0	0	0	0	0	0	0	0	0	0	0	0	0	0	0	0	0	0	0	0	0	0	0	0
1440	MH816398	p:Actinobacteria	f:Corynebacteriaceae(1.0000)	g:Corynebacterium(1.0000)	s:Corynebacterium_appendicis(0.7000)		0	0	0	0	37	0	5	21	0	61	0	0	0	2	0	0	0	0	0	0	1	0	0	0	1	0	0	0	0	0	0	0	0	0	0	0	0	0	0	0	0	0	0
1441	MH816399	p:Actinobacteria	f:Intrasporangiaceae(0.2200)	g:Agromyces(0.1700)	s:Actinotalea_suaedae(0.1400)		0	0	0	0	0	0	0	0	0	0	22	0	0	0	0	0	0	0	0	0	0	0	0	0	0	0	0	0	0	0	0	0	0	0	0	0	0	0	2	0	0	0	0
1443	MH816400	p:Deinococcus-Thermus	f:Deinococcaceae(0.1600)	g:Deinococcus(0.1400)	s:Gemmatimonas_aurantiaca(0.1100)		0	0	0	0	0	0	0	0	0	0	0	0	0	0	0	0	0	0	0	0	0	0	0	0	0	0	0	0	0	3	0	0	0	0	0	0	0	0	0	0	0	0	0
1445	MH816401	p:Bacteroidetes	f:Porphyromonadaceae(0.8800)	g:Parabacteroides(0.5700)	s:Parabacteroides_johnsonii(0.3600)		0	0	0	0	0	0	16	0	0	0	0	0	0	0	0	0	0	0	0	0	0	0	0	0	0	0	0	0	0	0	0	0	0	0	0	0	0	0	0	0	0	0	0
1448	MH816402	p:Proteobacteria	f:Micropepsaceae	g:Rhizomicrobium(0.2200)	s:Rhizomicrobium_electricum(0.2200)		0	0	0	0	0	6	0	0	0	0	0	0	0	0	0	0	0	0	0	0	0	0	0	0	0	0	0	0	0	0	0	0	0	0	0	0	0	0	0	0	0	0	0
1451	MH816403	p:Actinobacteria	f:Actinomycetaceae(1.0000)	g:Actinomyces(1.0000)	s:Actinomyces_bowdenii(0.6700)		0	0	0	0	23	0	0	0	0	0	0	0	0	0	0	0	0	0	0	0	0	0	0	0	0	0	0	0	0	0	0	0	0	0	0	0	0	0	0	0	0	0	0
1453	MH816404	p:Tenericutes	f:Mycoplasmataceae(0.3000)	g:Mycoplasma(0.3000)	s:Mycoplasma_verecundum(0.0700)		0	0	0	0	7	0	0	0	0	0	0	0	0	0	0	0	0	0	0	0	0	0	0	0	0	0	0	0	0	0	0	0	0	0	0	0	0	0	0	0	0	0	0
1454	MH816405	p:Actinobacteria	f:Thermomonosporaceae(0.1800)	g:Aciditerrimonas(0.1700)	s:Aciditerrimonas_ferrireducens(0.1700)		0	0	0	0	8	0	0	0	0	0	0	0	0	0	0	0	0	0	0	0	0	0	0	0	0	0	0	0	0	0	0	0	0	0	0	0	0	0	0	0	0	0	0
1455	MH816406	p:Proteobacteria	f:Caulobacteraceae(1.0000)	g:Caulobacter(0.9800)	s:Caulobacter_segnis(0.8800)		1	4	13	0	22	0	0	2	0	0	0	47	0	0	0	49	22	0	0	0	0	0	0	0	0	0	0	0	0	1	0	0	0	0	0	0	22	0	0	0	0	0	0
1456	MH816407	p:Bacteroidetes	f:Flavobacteriaceae(0.3000)	g:Flavobacterium(0.1700)	s:Fluviicola_hefeinensis(0.1300)		0	0	0	0	0	0	0	0	4	0	0	0	0	0	0	0	0	0	0	0	0	0	0	0	0	0	0	0	0	0	0	0	0	0	0	0	0	0	0	0	0	0	0
1457	MH816408	p:Tenericutes	f:Mycoplasmataceae(0.2500)	g:Mycoplasma(0.2500)	s:Catabacter_hongkongensis(0.0300)		0	0	0	0	0	0	0	0	0	0	0	0	0	0	0	0	0	0	0	0	0	0	0	0	0	0	0	0	0	0	0	0	0	0	0	0	0	0	0	0	0	0	0
1458	MH816409	p:Firmicutes	f:Unclassified_Thermoanaerobacterales(0.1600)	g:Caldicellulosiruptor(0.1200)	s:Gelria_glutamica(0.0800)		0	0	0	0	0	0	0	0	0	0	0	0	0	0	0	0	0	0	0	0	0	0	0	0	0	0	0	0	0	4	0	0	0	0	0	0	0	0	0	0	0	0	0
1459	MH816410	p:Bacteroidetes	f:Flavobacteriaceae(1.0000)	g:Empedobacter(1.0000)	s:Empedobacter_falsenii(1.0000)		0	0	0	0	0	0	4	0	0	0	0	0	0	0	0	0	0	0	0	0	0	0	0	0	0	0	0	0	0	0	0	0	0	0	0	0	0	0	0	0	0	0	0
1460	MH816411	p:Firmicutes	f:Lachnospiraceae(1.0000)	g:Lachnoanaerobaculum(1.0000)	s:Lachnoanaerobaculum_saburreum(0.5700)		0	0	0	0	0	0	2	0	0	0	0	0	0	0	0	0	0	0	1	0	0	0	0	0	0	0	0	0	0	0	0	0	0	0	0	0	0	0	0	0	0	0	0
1461	MH816412	p:Proteobacteria	f:Rhodanobacteraceae(1.0000)	g:Dyella(0.9300)	s:Dyella_ginsengisoli(0.4500)		1	4	12	0	0	5	5	2	0	0	0	0	3	0	2	0	1	0	0	0	0	0	0	0	0	0	0	0	0	0	0	0	0	0	0	0	0	0	0	0	0	0	0
1463	MH816413	p:Proteobacteria	f:Ectothiorhodospiraceae(0.1700)	g:Desulfovibrio(0.1700)	s:Desulfovibrio_hydrothermalis(0.0900)		0	0	0	0	0	0	0	0	0	0	0	0	5	0	0	0	0	0	0	0	0	0	0	0	0	0	0	0	0	0	0	0	0	0	0	0	0	0	0	0	0	0	0
1464	MH816414	p:Planctomycetes	f:Planctomycetaceae(1.0000)	g:Zavarzinella(0.8300)	s:Zavarzinella_formosa(0.8300)		0	0	0	0	0	0	0	4	0	0	0	0	0	0	0	0	0	0	0	0	0	0	0	0	0	0	0	0	0	0	0	0	0	0	0	0	0	0	0	0	0	0	0
1465	MH816415	p:Fusobacteria	f:Leptotrichiaceae(1.0000)	g:Leptotrichia(1.0000)	s:Leptotrichia_hongkongensis(1.0000)		0	0	0	0	0	0	1	1	0	0	0	0	0	0	0	0	0	0	0	0	0	0	0	0	0	0	0	0	0	0	0	0	0	0	0	0	0	0	0	0	0	0	0
1466	MH816416	p:Bacteroidetes	f:Rikenellaceae(0.9600)	g:Alistipes(0.9600)	s:Alistipes_shahii(0.4500)		0	0	0	0	0	0	11	0	0	0	0	0	0	0	0	0	0	0	0	0	0	0	0	0	0	0	0	0	0	0	0	0	0	0	0	0	0	0	0	0	0	0	0
1467	MH816417	p:Proteobacteria	f:Moraxellaceae(1.0000)	g:Acinetobacter(1.0000)	s:Acinetobacter_baumannii(0.8200)		0	0	0	0	0	0	3	0	0	0	0	0	0	0	0	0	0	0	0	0	0	0	0	0	0	0	0	0	0	0	0	3	0	0	0	0	0	0	0	0	0	0	0
1470	MH816418	p:Proteobacteria	f:Bdellovibrionaceae(0.3800)	g:Bdellovibrio(0.3800)	s:Bdellovibrio_bacteriovorus(0.3300)		0	0	0	0	0	0	3	0	0	0	0	0	0	0	0	0	0	0	0	0	0	0	0	0	0	0	0	0	0	0	0	0	0	0	0	0	0	0	0	0	0	0	0
1471	MH816419	p:Proteobacteria	f:Rhodanobacteraceae(0.9600)	g:Rhodanobacter(0.9500)	s:Rhodanobacter_thiooxydans(0.4000)		0	0	0	0	0	0	3	0	0	0	0	0	0	0	0	0	0	0	0	0	0	0	0	0	0	0	0	0	0	0	0	0	0	0	0	0	0	0	0	0	0	0	0
1472	MH816420	p:Proteobacteria	f:Methylococcaceae(0.3100)	g:Methylocaldum(0.2700)	s:Methylocaldum_gracile(0.1600)		0	0	0	0	0	0	0	0	0	0	0	0	0	0	5	0	0	0	0	0	0	0	0	0	0	0	0	0	0	0	0	0	0	0	0	0	0	0	0	0	0	0	0
1475	MH816421	p:Firmicutes	f:Clostridiaceae(0.4400)	g:Clostridium(0.3600)	s:Natranaerovirga_hydrolytica(0.2500)		0	0	0	0	0	0	2	0	0	0	0	0	0	0	0	0	0	0	0	0	0	0	0	0	0	0	0	0	0	0	0	0	0	0	0	0	0	0	0	0	0	0	0
1477	MH816422	p:Firmicutes	f:Eubacteriaceae(0.8200)	g:Eubacterium(0.8200)	s:Eubacterium_coprostanoligenes(0.8200)		0	0	0	0	0	0	3	0	0	0	0	0	0	0	0	0	0	0	0	0	0	0	0	0	0	0	0	0	0	0	0	0	0	0	0	0	0	0	0	0	0	0	0
1478	MH816423	p:Planctomycetes	f:Planctomycetaceae(1.0000)	g:Planctopirus(0.9000)	s:Planctopirus_limnophila(0.9000)		0	0	0	0	0	0	0	0	0	0	0	8	0	0	0	0	0	0	0	0	0	0	0	0	0	0	0	0	0	0	0	0	0	0	0	0	0	0	0	0	0	0	0
1479	MH816424	p:Bacteroidetes	f:Flavobacteriaceae(1.0000)	g:Epilithonimonas(0.9400)	s:Epilithonimonas_lactis(0.9000)		0	0	0	0	0	0	2	0	0	0	0	0	0	0	0	0	0	0	0	0	0	0	0	0	0	0	0	0	0	0	0	0	0	0	0	0	0	0	0	0	0	0	0
1482	MH816425	p:Bacteroidetes	f:Rikenellaceae(0.9800)	g:Alistipes(0.8700)	s:Alistipes_indistinctus(0.8600)		0	0	0	0	0	0	2	0	0	0	0	0	0	0	0	0	0	0	0	0	0	0	0	0	0	0	0	0	0	0	0	0	0	0	0	0	0	0	0	0	0	0	0
1488	MH816426	p:Proteobacteria	f:Burkholderiaceae(0.5700)	g:Polynucleobacter(0.5600)	s:Polynucleobacter_cosmopolitanus(0.5400)		0	0	0	0	0	0	0	0	0	0	0	0	0	0	0	0	0	0	0	0	0	0	0	0	0	0	0	0	0	3	0	0	0	0	0	0	0	0	0	0	0	0	0
1489	MH816427	p:Proteobacteria	f:Polyangiaceae(0.6400)	g:Chondromyces(0.3800)	s:Chondromyces_crocatus(0.3100)		0	0	0	0	0	0	2	0	0	0	0	0	0	0	0	0	0	0	0	0	0	0	0	0	0	0	0	0	0	0	0	0	0	0	0	0	0	0	0	0	0	0	0
1491	MH816428	p:Proteobacteria	f:Caulobacteraceae(0.8900)	g:Brevundimonas(0.5500)	s:Brevundimonas_aveniformis(0.2300)		0	0	0	0	0	0	0	0	0	0	0	0	0	0	0	0	0	2	0	0	0	0	0	0	0	0	0	0	0	0	0	0	0	0	0	0	0	0	0	0	0	0	0
1493	MH816429	p:Proteobacteria	f:Desulfobacteraceae(0.2000)	g:Acidaminococcus(0.1000)	s:Acidaminococcus_fermentans(0.0900)		0	0	0	0	0	0	0	0	0	0	0	0	0	0	0	0	0	0	0	0	0	0	0	0	0	0	0	0	0	3	0	0	0	0	0	0	0	0	0	0	0	0	0
1496	MH816430	p:Chlamydiae	f:Simkaniaceae(0.1700)	g:Simkania(0.1700)	s:Simkania_negevensis(0.1700)		0	0	0	0	0	0	0	0	0	0	0	0	0	0	0	0	0	6	0	0	0	0	0	0	0	0	0	0	0	0	0	0	0	0	0	0	0	0	0	0	0	0	0
1497	MH816431	p:Acidobacteria	f:Bryobacteraceae	g:Paludibaculum(0.5000)	s:Paludibaculum_fermentans(0.5000)		0	0	0	0	0	0	2	0	0	0	0	0	0	0	0	0	0	0	0	0	0	0	0	0	0	0	0	0	0	0	0	0	0	0	0	0	0	0	0	0	0	0	0
1500	MH816432	p:Firmicutes	f:Enterococcaceae(0.9000)	g:Enterococcus(0.4700)	s:Enterococcus_asini(0.3200)		0	0	0	0	0	0	1	0	0	0	0	0	0	0	0	0	0	0	0	0	4	0	0	0	0	0	0	0	0	0	0	0	0	0	0	0	0	0	0	0	0	0	0
1501	MH816433	p:Firmicutes	f:Clostridiaceae(0.2000)	g:Blastopirellula(0.1300)	s:Blastopirellula_cremea(0.1200)		0	0	0	0	0	0	0	0	0	0	0	0	0	0	0	0	0	0	0	0	0	0	0	0	0	0	0	0	0	0	0	0	0	0	0	0	0	0	0	0	0	0	0
1504	MH816434	p:Planctomycetes	f:Planctomycetaceae(0.9900)	g:Blastopirellula(0.6300)	s:Blastopirellula_cremea(0.6000)		0	0	0	0	0	0	0	0	0	0	0	0	0	4	0	0	0	0	0	0	0	0	0	0	0	0	0	0	0	0	0	0	0	0	0	0	0	0	0	0	0	0	0
1506	MH816435	p:Proteobacteria	f:Pseudomonadaceae(0.9500)	g:Pseudomonas(0.9300)	s:Pseudomonas_alcaliphila(0.7000)		0	7	10	0	1	0	0	0	0	0	10	1	0	0	8	5	16	0	0	0	0	0	0	0	0	0	0	0	0	0	0	0	0	0	0	0	0	0	0	0	0	0	0
1508	MH816436	p:Bacteroidetes	f:Porphyromonadaceae(0.8500)	g:Parabacteroides(0.6500)	s:Parabacteroides_johnsonii(0.2300)		0	0	0	0	0	0	2	0	0	2	0	0	0	0	0	0	0	0	0	0	0	0	0	0	0	0	0	0	0	0	0	0	0	0	0	0	0	0	0	0	0	0	0
1509	MH816437	p:Proteobacteria	f:Rhodobacteraceae(0.1000)	g:Anaerococcus(0.0600)	s:Arcobacter_halophilus(0.0400)		0	0	2	0	0	0	0	0	0	0	0	0	0	2	0	0	1	0	0	0	0	0	0	0	0	0	0	0	0	0	0	0	0	0	0	0	0	0	0	0	0	0	0
1512	MH816438	p:Proteobacteria	f:Desulfovibrionaceae(0.3100)	g:Desulfovibrio(0.1600)	s:Bilophila_wadsworthia(0.1500)		0	0	0	0	0	4	0	0	0	0	0	0	0	0	0	0	0	0	0	0	0	0	0	0	0	0	0	0	0	0	0	0	0	0	0	0	0	0	0	0	0	0	0
1513	MH816439	p:Bacteroidetes	f:Flavobacteriaceae(0.1300)	g:Bacteroides(0.1200)	s:Actinoalloteichus_cyanogriseus(0.0500)		0	0	0	0	0	0	0	0	0	0	0	0	0	0	0	0	0	0	0	0	0	0	0	0	0	0	0	0	0	7	0	0	0	0	0	0	0	0	1	0	0	0	0
1515	MH816440	p:Firmicutes	f:Unclassified_Thermoanaerobacterales(0.1700)	g:Desulfotomaculum(0.1100)	s:Desulfotomaculum_kuznetsovii(0.1100)		0	0	0	0	0	0	0	0	0	0	0	0	0	0	0	0	0	0	0	0	0	0	0	0	0	0	0	0	0	5	0	0	0	0	0	0	0	0	0	0	0	0	0
1516	MH816441	p:Proteobacteria	f:Rhodospirillaceae(0.3700)	g:Dongia(0.3300)	s:Dongia_mobilis(0.3300)		0	0	0	0	0	0	0	0	0	0	0	0	3	0	0	0	0	0	0	0	0	0	0	0	0	0	0	0	0	0	0	0	0	0	0	0	0	0	0	0	0	0	0
1517	MH816442	p:Proteobacteria	f:Beijerinckiaceae(0.7800)	g:Beijerinckia(0.7800)	s:Beijerinckia_fluminensis(0.7800)		0	0	0	0	0	0	0	0	0	0	0	0	4	0	0	0	0	0	0	0	0	0	0	0	0	0	0	0	0	0	0	0	0	0	0	0	0	0	0	0	0	0	0
1522	MH816443	p:Firmicutes	f:Ruminococcaceae(0.7600)	g:Anaerotruncus(0.3800)	s:Anaerotruncus_colihominis(0.3800)		0	0	0	0	0	0	3	0	0	0	0	0	0	0	0	0	0	0	0	0	0	0	0	0	0	0	0	0	0	0	0	0	0	0	0	0	0	0	0	0	0	0	0
1523	MH816444	p:Proteobacteria	f:Nannocystaceae(0.9300)	g:Nannocystis(0.4200)	s:Nannocystis_exedens(0.4200)		0	0	0	0	0	0	0	0	0	0	0	0	0	0	0	0	0	0	0	0	0	0	0	0	0	0	0	0	0	0	0	0	0	0	0	0	0	0	0	0	0	0	0
1524	MH816445	p:Bacteroidetes	f:Rikenellaceae(1.0000)	g:Alistipes(1.0000)	s:Alistipes_finegoldii(1.0000)		0	0	0	0	0	0	4	0	0	0	0	0	0	0	0	0	0	0	0	0	0	0	0	0	0	0	0	0	0	0	0	0	0	0	0	0	0	0	0	0	0	0	0
1526	MH816446	p:Proteobacteria	f:Legionellaceae(0.5400)	g:Legionella(0.5400)	s:Legionella_londiniensis(0.1700)		0	0	0	0	0	0	0	0	0	0	0	0	5	0	0	0	0	0	0	0	0	0	0	0	0	0	0	0	0	0	0	0	0	0	0	0	0	0	0	0	0	0	0
1527	MH816447	p:Actinobacteria	f:Frankiaceae(0.7100)	g:Jatrophihabitans(0.7100)	s:Jatrophihabitans_endophyticus(0.7100)		0	0	0	0	0	0	0	0	0	0	0	0	0	0	0	0	0	0	0	0	0	0	0	0	0	0	0	0	0	0	0	0	0	0	0	0	0	0	0	0	0	0	0
1529	MH816448	p:Actinobacteria	f:Acidimicrobiaceae(0.3900)	g:Ferrimicrobium(0.1500)	s:Ferrimicrobium_acidiphilum(0.1500)		0	0	0	0	0	0	0	0	0	0	0	0	0	6	0	0	0	0	0	0	0	0	0	0	0	0	0	0	0	0	0	0	0	0	0	0	0	0	0	0	0	0	0
1530	MH816449	p:Firmicutes	f:Unclassified_Clostridiales(1.0000)	g:Blautia(1.0000)	s:Blautia_luti(0.9900)		0	0	0	0	0	0	2	0	0	0	0	0	0	0	0	0	0	0	0	0	0	0	0	0	0	0	0	0	0	0	0	0	0	0	0	0	0	0	0	0	0	0	0
1533	MH816450	p:Bacteroidetes	f:Chitinophagaceae(0.7900)	g:Chitinophaga(0.3500)	s:Arachidicoccus_rhizosphaerae(0.2400)		0	0	0	0	20	0	0	0	0	0	0	0	0	0	0	0	0	0	0	0	0	0	0	0	0	0	0	0	0	0	0	0	0	0	0	0	0	0	0	0	0	0	0
1535	MH816451	p:Firmicutes	f:Lachnospiraceae(1.0000)	g:Anaerostipes(1.0000)	s:Anaerostipes_hadrus(1.0000)		0	0	0	0	0	0	0	0	0	0	0	0	0	0	9	0	0	0	0	0	0	0	0	0	0	0	0	0	0	0	0	0	0	0	0	0	0	0	0	0	0	0	0
1536	MH816452	p:Proteobacteria	f:Rhodanobacteraceae(0.1300)	g:Legionella(0.1000)	s:Rudaea_cellulosilytica(0.0800)		0	0	0	0	0	0	0	0	0	0	0	0	0	0	0	0	4	0	0	0	0	0	0	0	0	0	0	0	0	0	0	0	0	0	0	0	0	0	0	0	0	0	0
1539	MH816453	p:Proteobacteria	f:Rhodospirillaceae(0.1400)	g:Alkalibacter(0.1200)	s:Alkalibacter_saccharofermentans(0.1200)		0	0	0	0	0	0	0	0	0	0	0	0	0	0	0	0	5	0	0	0	0	0	0	0	0	0	0	0	0	0	0	0	0	0	0	0	0	0	0	0	0	0	0
1540	MH816454	p:Bacteroidetes	f:Cryomorphaceae(0.9800)	g:Fluviicola(0.8400)	s:Fluviicola_hefeinensis(0.5600)		0	0	0	0	6	0	0	0	0	0	0	91	13	0	0	0	0	0	0	0	1	0	0	0	0	0	0	0	0	0	0	0	0	0	0	0	0	0	0	0	0	0	0
1541	MH816455	p:Proteobacteria	f:Micropepsaceae	g:Rhizomicrobium(0.1900)	s:Rhizomicrobium_electricum(0.1500)		0	0	0	0	0	0	0	0	0	0	7	0	0	0	0	0	0	0	0	0	0	0	0	0	0	0	0	0	0	0	0	0	0	0	0	0	0	0	0	0	0	0	0
1542	MH816456	p:Bacteroidetes	f:Prevotellaceae(1.0000)	g:Prevotella(1.0000)	s:Prevotella_oris(1.0000)		0	0	0	0	0	0	2	0	0	0	0	0	0	0	0	0	0	0	0	0	0	0	0	0	0	0	0	0	0	0	0	0	0	0	0	0	0	0	0	0	0	0	0
1544	MH816457	p:Proteobacteria	f:Rhodobacteraceae(0.4900)	g:Bartonella(0.3500)	s:Ahrensia_kielensis(0.2500)		0	0	0	0	0	0	7	0	0	0	0	0	0	0	0	0	0	0	0	0	0	0	0	0	0	0	0	0	0	0	0	0	0	0	0	0	0	0	0	0	0	0	0
1545	MH816458	p:Bacteroidetes	f:Bacteroidaceae(0.2500)	g:Acetomicrobium(0.2500)	s:Acetomicrobium_faecale(0.1900)		0	0	0	0	0	0	0	0	0	0	0	0	0	0	0	0	0	0	0	0	0	0	0	0	0	0	0	0	0	5	0	0	0	0	0	0	0	0	0	0	0	0	0
1546	MH816459	p:Bacteroidetes	f:Prevotellaceae(1.0000)	g:Alloprevotella(1.0000)	s:Alloprevotella_rava(1.0000)		0	0	0	0	0	0	0	0	0	0	0	0	0	0	0	0	0	0	0	0	0	0	0	0	0	0	0	0	0	0	0	0	4	0	0	0	0	0	0	0	0	0	0
1547	MH816460	p:Cyanobacteria	f:Nostocales(0.4100)	g:Halotia(0.4100)	s:Halotia_branconii(0.3700)		0	0	0	0	0	0	0	0	5	0	0	0	0	0	0	0	0	0	0	0	0	0	0	0	0	0	0	0	0	0	0	0	0	0	0	0	0	0	0	0	0	0	0
1549	MH816461	p:Bacteroidetes	f:Rikenellaceae(0.1500)	g:Luteivirga(0.1500)	s:Luteivirga_sdotyamensis(0.1500)		0	0	0	0	0	0	0	0	0	0	0	0	0	0	0	0	0	0	0	0	1	0	0	0	0	0	0	0	0	0	0	0	1	0	0	0	0	0	0	0	0	0	0
1550	MH816462	p:Bacteroidetes	f:Chitinophagaceae(1.0000)	g:Sediminibacterium(0.3900)	s:Parasegetibacter_terrae(0.3800)		0	0	0	0	0	0	0	0	0	0	0	0	0	0	0	0	18	0	0	0	0	0	0	0	0	0	0	0	0	0	0	0	0	0	0	0	0	0	0	0	0	0	0
1551	MH816463	p:Proteobacteria	f:Enterobacteriaceae(0.0700)	g:Psychromonas(0.0700)	s:Acetoanaerobium_noterae(0.0600)		0	2	2	0	0	0	0	0	0	0	0	0	0	0	0	0	0	0	0	0	0	0	0	0	0	0	0	0	0	0	0	0	0	0	0	0	0	0	0	0	0	0	0
1554	MH816464	p:Firmicutes	f:Bacillaceae(0.3600)	g:Staphylococcus(0.3300)	s:Bacillus_funiculus(0.1600)		0	0	0	0	0	0	0	0	0	0	6	0	0	0	0	0	0	0	0	0	0	0	1	0	4	1	0	0	0	0	0	0	0	0	0	0	0	0	0	0	0	0	0
1555	MH816465	p:Cyanobacteria	f:Oscillatoriales(0.2400)	g:Planktothricoides(0.1800)	s:Planktothricoides_raciborskii(0.1800)		0	0	0	0	0	0	0	0	3	0	0	0	0	0	0	0	0	0	0	0	0	0	0	0	0	0	0	0	0	0	0	0	0	0	0	0	0	0	0	0	0	0	0
1556	MH816466	p:Proteobacteria	f:Desulfobacteraceae(0.2700)	g:Desulfobacterium(0.1700)	s:Desulfobacterium_indolicum(0.1700)		0	0	0	0	0	0	0	0	5	0	0	0	0	0	0	0	0	0	0	0	0	0	0	0	0	0	0	0	0	0	0	0	0	0	0	0	0	0	0	0	0	0	0
1561	MH816467	p:Actinobacteria	f:Acidomicrobiaceae(0.8900)	g:Aciditerrimonas(0.8900)	s:Aciditerrimonas_ferrireducens(0.8900)		0	0	0	0	0	0	0	0	0	0	0	0	0	0	0	0	0	0	0	0	0	0	0	0	0	0	0	0	0	0	0	0	0	0	0	0	0	0	0	0	0	0	0
1562	MH816468	p:Firmicutes	f:Planococcaceae(0.8100)	g:Sporosarcina(0.8100)	s:Sporosarcina_pasteurii(0.5500)		10594	0	0	0	0	14	0	0	0	0	0	0	0	0	0	0	0	0	0	1	0	0	0	0	0	0	1	0	0	0	0	0	0	0	0	0	0	0	0	0	0	0	0
1563	MH816469	p:Proteobacteria	f:Campylobacteraceae(0.2700)	g:Arcobacter(0.1800)	s:Arcobacter_suis(0.1500)		0	0	0	0	0	0	0	0	0	0	0	0	0	0	0	0	0	0	0	0	0	0	0	0	0	0	0	0	0	3	0	0	0	0	0	0	0	0	0	0	0	0	0
1565	MH816470	p:Firmicutes	f:Enterococcaceae(0.9700)	g:Enterococcus(0.8800)	s:Enterococcus_canintestini(0.3800)		0	0	0	0	0	0	11	0	0	1	0	0	1	0	0	0	0	0	0	0	0	0	0	0	0	0	0	0	0	0	0	0	0	0	0	0	0	0	0	0	0	0	0
1566	MH816471	p:Bacteroidetes	f:Flavobacteriaceae(0.1000)	g:Chryseobacterium(0.0700)	s:Halopolyspora_alba(0.0700)		0	0	0	0	0	0	0	0	0	0	0	0	0	0	0	0	0	0	0	0	0	0	0	0	0	0	0	0	0	4	0	0	0	0	0	0	0	0	0	0	0	0	0
1568	MH816472	p:Proteobacteria	f:Ectothiorhodospiraceae(0.4800)	g:Acidiferrobacter(0.3100)	s:Acidiferrobacter_thiooxydans(0.3100)		0	0	0	0	0	0	0	0	0	0	0	0	0	0	0	0	0	0	0	0	0	0	0	0	0	0	0	0	0	3	0	0	0	0	0	0	0	0	0	0	0	0	0
1569	MH816473	p:Firmicutes	f:Thermoanaerobacteraceae(0.2100)	g:Ammoniphilus(0.1000)	s:Ammoniphilus_oxalaticus(0.0900)		0	0	0	0	0	0	0	0	0	0	0	0	0	0	0	0	0	0	0	0	0	0	0	0	0	0	0	0	0	3	0	0	0	0	0	0	0	0	0	0	0	0	0
1570	MH816474	p:Proteobacteria	f:Rhodospirillaceae(0.2700)	g:Desulfatiglans(0.2100)	s:Desulfatiglans_anilini(0.2100)		0	0	0	0	0	0	0	0	0	0	0	0	0	0	0	0	0	0	0	0	0	0	0	0	0	0	0	0	0	6	0	0	0	0	0	0	0	0	0	0	0	0	0
1571	MH816475	p:Actinobacteria	f:Microbacteriaceae(0.9900)	g:Chryseoglobus(0.4500)	s:Chryseoglobus_frigidaquae(0.4500)		0	5	9	0	0	0	0	0	2	28	8	0	0	0	0	68	25	2	0	0	1	0	0	0	2	0	0	0	0	0	0	0	0	0	0	0	0	0	0	1	0	0	0
1572	MH816476	p:Firmicutes	f:Lachnospiraceae(0.0600)	g:Cellvibrio(0.0600)	s:Cellvibrio_japonicus(0.0600)		0	0	0	0	0	2	0	2	1	4	2	16	1	0	0	0	4	1	0	0	0	0	0	0	0	0	0	0	0	0	0	0	0	0	0	0	0	0	0	0	0	0	0
1574	MH816477	p:Proteobacteria	f:Pseudomonadaceae(1.0000)	g:Pseudomonas(0.9900)	s:Pseudomonas_anguilliseptica(0.9700)		0	1	6	0	1	0	0	0	0	0	1	0	0	0	0	0	7	0	0	0	0	0	0	0	0	0	0	0	0	0	0	0	0	0	0	0	0	0	0	0	0	0	0
1575	MH816478	p:Bacteroidetes	f:Flavobacteriaceae(0.0800)	g:Peptoniphilus(0.0600)	s:Halomonas_alkaliphila(0.0400)		0	0	0	0	0	0	0	0	0	3	0	0	0	0	0	0	0	0	0	0	0	0	0	0	0	0	0	0	0	0	0	0	0	0	0	0	0	0	0	0	0	0	0
1578	MH816479	p:Bacteroidetes	f:Sphingobacteriaceae(1.0000)	g:Pedobacter(0.9500)	s:Pedobacter_jejuensis(0.4500)		0	0	0	0	0	0	14	0	0	0	0	0	0	0	0	0	0	0	0	0	0	0	0	0	0	0	0	0	0	0	0	0	0	0	0	0	0	0	0	0	0	0	0
1579	MH816480	p:Firmicutes	f:Clostridiaceae(0.8900)	g:Clostridium(0.7700)	s:Clostridium_algidixylanolyticum(0.1400)		0	0	0	0	0	0	4	0	0	0	0	0	0	0	0	0	0	0	0	0	0	0	0	0	0	0	0	0	0	0	0	0	0	0	0	0	0	0	0	0	0	0	0
1583	MH816481	p:Proteobacteria	f:Bradyrhizobiaceae(1.0000)	g:Bosea(1.0000)	s:Bosea_eneae(1.0000)		0	0	0	0	0	0	0	0	0	0	0	0	0	0	0	0	24	0	0	0	0	0	0	0	0	0	0	0	0	0	0	0	0	0	0	0	0	0	0	0	0	0	0
1586	MH816482	p:Proteobacteria	f:Rhodospirillaceae(0.3400)	g:Rhizomicrobium(0.3100)	s:Rhizomicrobium_electricum(0.2200)		0	0	0	0	0	0	3	0	0	0	0	0	0	0	0	0	0	0	0	0	0	0	0	0	0	0	0	0	0	0	0	0	0	0	0	0	0	0	0	0	0	0	0
1589	MH816483	p:Actinobacteria	f:Iamiaceae(0.0800)	g:Aquihabitans(0.0800)	s:Aquihabitans_daechungensis(0.0800)		0	0	0	0	0	0	0	0	0	0	0	0	0	0	0	0	0	0	0	0	0	0	0	0	0	0	0	0	0	3	0	0	0	0	0	0	0	0	0	0	0	0	0
1590	MH816484	p:Bacteroidetes	f:Chitinophagaceae(1.0000)	g:Terrimonas(0.7500)	s:Terrimonas_lutea(0.6900)		0	0	0	0	0	0	3	0	0	0	0	0	0	0	0	0	0	0	0	0	0	0	0	0	0	0	0	0	0	0	0	0	0	0	0	0	0	0	0	0	0	0	0
1591	MH816485	p:Proteobacteria	f:Enterobacteriaceae(0.9900)	g:Cronobacter(0.3400)	s:Pantoea_allii(0.3200)		0	9	14	0	0	1	6	0	2	0	680	0	0	0	0	0	35	2	0	0	0	0	0	0	0	0	0	0	0	0	0	0	0	0	0	0	0	0	0	0	0	0	0
1593	MH816486	p:Proteobacteria	f:Comamonadaceae(0.6900)	g:Acidovorax(0.1700)	s:Pelomonas_puraquae(0.1200)		0	0	0	0	0	0	0	0	3	0	0	0	0	0	0	0	17	0	0	0	0	0	0	0	0	0	0	0	0	0	0	0	0	0	0	0	0	0	0	0	0	0	0
1595	MH816487	p:Proteobacteria	f:Campylobacteraceae(1.0000)	g:Arcobacter(1.0000)	s:Arcobacter_butzleri(1.0000)		0	0	0	0	0	0	2	0	0	0	0	0	0	0	0	0	0	0	0	0	0	0	0	0	0	0	0	0	0	0	0	0	0	0	0	1	0	0	0	0	0	0	0
1598	MH816488	p:Bacteroidetes	f:Prevotellaceae(0.9300)	g:Prevotella(0.9300)	s:Prevotella_maculosa(0.3700)		0	0	0	0	0	0	3	0	0	0	0	0	0	0	0	0	0	0	0	0	0	0	0	0	0	0	0	0	0	0	0	0	0	0	0	0	0	0	0	0	0	0	0
1601	MH816489	p:Firmicutes	f:Lactobacillaceae(1.0000)	g:Lactobacillus(1.0000)	s:Lactobacillus_melliventris(0.4000)		0	0	0	0	0	0	0	0	0	0	0	0	0	0	0	0	0	0	0	0	0	1	0	0	0	0	0	0	0	0	0	0	1	0	0	0	14	0	0	0	11	0	0
1602	MH816490	p:Bacteroidetes	f:Flavobacteriaceae(1.0000)	g:Chryseobacterium(1.0000)	s:Chryseobacterium_camelliae(0.8400)		0	0	8	0	0	7	0	0	0	0	0	0	0	0	0	0	0	0	0	0	0	0	0	0	0	0	0	0	0	0	0	0	0	0	0	0	0	0	0	0	0	0	0
1603	MH816491	p:Proteobacteria	f:Unclassified_Lysobacteriales(0.1400)	g:Povalibacter(0.1400)	s:Povalibacter_uvarum(0.1400)		0	0	0	0	0	5	0	0	0	0	0	0	0	0	0	0	0	0	0	0	0	0	0	0	0	0	0	0	0	0	0	0	0	0	0	0	0	0	0	0	0	0	0
1608	MH816492	p:Actinobacteria	f:Propionibacteriaceae(1.0000)	g:Propionibacterium(1.0000)	s:Propionibacterium_granulosum(0.9300)		0	0	0	0	0	0	0	0	0	0	0	0	2	0	0	0	0	0	0	0	0	0	0	0	0	0	0	0	0	0	0	0	0	0	0	0	0	0	0	0	0	0	0
1610	MH816493	p:Acidobacteria	f:Bryobacteraceae	g:Paludibaculum(0.4000)	s:Paludibaculum_fermentans(0.4000)		0	0	0	0	0	0	0	0	0	0	0	0	2	0	0	0	0	0	0	0	0	0	0	0	0	0	0	0	0	0	0	0	0	0	0	0	0	0	0	0	0	0	0
1611	MH816494	p:Bacteroidetes	f:Ignavibacteriaceae(0.1700)	g:Ignavibacterium(0.1700)	s:Ignavibacterium_album(0.1700)		0	0	0	0	0	0	2	0	0	0	0	0	0	0	0	0	0	0	0	0	0	0	0	0	0	0	0	0	0	0	0	0	0	0	0	0	0	0	0	0	0	0	0
1614	MH816495	p:Proteobacteria	f:Enterobacteriaceae(0.6300)	g:Photorhabdus(0.2500)	s:Photorhabdus_asymbiotica_subsp._australis(0.1500)		0	0	0	0	0	0	2	0	0	0	0	0	0	0	0	0	0	0	0	0	0	0	0	0	0	0	0	0	0	0	0	0	0	0	0	0	0	0	0	0	0	0	0
1615	MH816496	p:Proteobacteria	f:Sphingomonadaceae(1.0000)	g:Sphingomonas(1.0000)	s:Sphingomonas_kaistensis(0.8700)		0	0	0	0	0	0	0	0	6	0	0	0	0	0	0	0	0	4	0	0	0	0	0	0	0	0	0	0	0	0	0	0	0	0	0	0	0	0	0	0	0	0	0
1616	MH816497	p:Proteobacteria	f:Enterobacteriaceae(1.0000)	g:Erwinia(0.7400)	s:Erwinia_oleae(0.7400)		0	0	0	0	30	0	2	0	0	0	6	0	0	0	0	2	0	0	0	0	0	0	0	0	0	0	0	0	0	0	0	0	0	0	0	0	0	0	0	0	0	0	0
1617	MH816498	p:Proteobacteria	f:Beijerinckiaceae(0.9900)	g:Methylovirgula(0.9700)	s:Methylovirgula_ligni(0.9700)		0	0	2	0	0	0	4	0	0	0	0	0	0	0	0	0	0	0	0	0	0	0	0	0	0	0	0	0	0	0	0	0	0	0	0	0	0	0	0	0	0	0	0
1620	MH816499	p:Proteobacteria	f:Oxalobacteraceae(1.0000)	g:Herminiimonas(0.9600)	s:Herminiimonas_arsenicoxydans(0.9500)		0	1	13	0	8	0	0	0	0	0	0	0	0	0	0	15	20	0	0	0	0	0	0	0	1	0	0	0	0	0	0	0	0	0	0	0	0	0	0	0	0	0	0
1625	MH816500	p:Actinobacteria	f:Actinomycetaceae(0.1000)	g:Actinomyces(0.1000)	s:Actinomyces_coleocanis(0.0800)		0	0	0	0	0	0	0	0	0	0	0	0	0	0	0	0	1	0	0	0	0	0	0	0	0	0	0	0	0	0	0	0	0	0	0	0	1	0	0	0	0	0	0
1626	MH816501	p:Bacteroidetes	f:Porphyromonadaceae(1.0000)	g:Proteiniphilum(0.8900)	s:Proteiniphilum_acetatigenes(0.8900)		0	0	0	0	0	0	0	0	0	0	0	0	0	0	0	0	0	3	0	0	0	0	0	0	0	0	0	0	0	0	0	0	0	0	0	0	0	0	0	0	0	0	0
1627	MH816502	p:Bacteroidetes	f:Saprospiraceae(0.8700)	g:Lewinella(0.8600)	s:Lewinella_marina(0.7000)		0	0	0	0	0	0	0	0	6	0	0	0	0	0	0	0	0	0	0	0	0	0	0	0	0	0	0	0	0	0	0	0	0	0	0	0	0	0	0	0	0	0	0
1629	MH816503	p:Firmicutes	f:Eubacteriaceae(0.7800)	g:Eubacterium(0.7800)	s:Eubacterium_eligens(0.7800)		0	0	0	0	0	0	2	0	0	0	0	0	0	0	0	0	0	0	0	0	0	0	0	0	0	0	0	0	0	0	0	0	0	0	0	0	0	0	0	0	0	0	0
1631	MH816504	p:Proteobacteria	f:Alcaligenaceae(0.9900)	g:Kerstersia(0.5400)	s:Kerstersia_similis(0.2900)		0	0	0	0	0	0	0	0	0	0	0	0	0	0	0	0	0	0	0	0	0	0	0	0	0	0	0	0	0	3	0	0	0	0	0	0	0	0	0	0	0	0	0
1632	MH816505	p:Bacteroidetes	f:Sphingobacteriaceae(1.0000)	g:Pedobacter(0.4500)	s:Pedobacter_bauzanensis(0.2400)		0	0	0	0	0	0	8	0	0	0	0	0	0	0	0	0	0	0	0	0	0	0	0	0	0	0	0	0	0	0	0	0	0	0	0	0	0	0	0	0	0	0	0
1634	MH816506	p:Chlamydiae	f:Parachlamydiaceae(0.9800)	g:Parachlamydia(0.5600)	s:Parachlamydia_acanthamoebae(0.5600)		0	0	1	0	0	0	0	0	0	31	0	28	0	4	2	0	0	0	0	0	0	0	0	0	0	0	0	0	0	0	0	0	0	0	0	0	0	0	0	0	0	0	0
1635	MH816507	p:Proteobacteria	f:Oxalobacteraceae(0.6000)	g:Undibacterium(0.3700)	s:Undibacterium_oligocarboniphilum(0.3700)		0	0	0	0	0	0	0	0	0	16	4	0	0	1	0	0	14	0	0	0	0	0	0	0	0	0	0	0	0	2	0	0	0	1	0	0	0	0	0	0	0	0	0
1636	MH816508	p:Acidobacteria	f:Acidobacteriaceae(1.0000)	g:Acidobacterium(0.7900)	s:Acidobacterium_capsulatum(0.7900)		0	0	0	0	0	0	5	0	0	0	0	0	0	0	0	0	0	0	0	0	0	0	0	0	0	0	0	0	0	0	0	0	0	0	0	0	0	0	0	0	0	0	0
1637	MH816509	p:Firmicutes	f:Thermoanaerobacteraceae(0.3900)	g:Brockia(0.2600)	s:Brockia_lithotrophica(0.2600)		0	0	0	0	0	5	0	0	0	0	0	0	0	0	0	0	0	0	0	0	0	0	0	0	0	0	0	0	0	0	0	0	0	0	0	0	0	0	0	0	0	0	0
1638	MH816510	p:Proteobacteria	f:Sphingomonadaceae(0.7600)	g:Sphingopyxis(0.7200)	s:Sphingopyxis_soli(0.4700)		0	22	103	0	6	10	1	0	1	0	0	1	0	0	0	0	0	0	0	0	0	0	0	0	0	0	0	0	0	0	0	0	0	0	0	0	0	0	0	0	0	0	0
1639	MH816511	p:Proteobacteria	f:Rhizobiaceae(1.0000)	g:Shinella(0.9700)	s:Shinella_granuli(0.9600)		0	0	2	0	0	0	0	0	0	0	1	0	0	0	0	0	0	0	0	0	0	0	0	0	0	0	0	0	0	0	0	0	0	0	0	0	0	0	0	0	0	0	0
1640	MH816512	p:Spirochaetes	f:Sporichthyaceae(0.4500)	g:Sporichthya(0.4500)	s:Sporichthya_brevicatena(0.4500)		0	0	2	0	0	0	0	0	0	0	0	0	0	0	0	0	0	0	0	0	0	0	0	0	0	0	0	0	0	0	0	0	0	0	0	0	0	0	0	0	0	0	0
1641	MH816513	p:Firmicutes	f:Clostridiaceae(0.1100)	g:Bacillus(0.0700)	s:Afipia_clevelandensis(0.0400)		0	0	0	0	0	0	0	0	0	3	0	0	0	0	0	0	0	0	0	0	0	0	0	0	0	0	0	0	0	0	0	0	0	0	0	0	0	0	0	0	0	0	0
1643	MH816514	p:Bacteroidetes	f:Chitinophagaceae(1.0000)	g:Sediminibacterium(0.3500)	s:Sediminibacterium_ginsengisoli(0.2500)		0	0	0	0	0	0	0	0	0	0	3	0	0	0	0	0	0	0	0	0	0	0	0	0	0	0	0	0	0	0	0	0	0	0	0	0	0	0	0	0	0	0	0
1644	MH816515	p:Firmicutes	f:Peptococcaceae(1.0000)	g:Peptococcus(1.0000)	s:Peptococcus_niger(1.0000)		0	0	0	0	0	0	2	0	0	0	0	0	0	0	0	0	0	0	0	0	0	0	0	0	0	0	0	0	0	0	0	0	0	0	0	0	0	0	0	0	0	0	0
1645	MH816516	p:Bacteroidetes	f:Flavobacteriaceae(1.0000)	g:Capnocytophaga(1.0000)	s:Capnocytophaga_sputigena(1.0000)		0	0	0	0	0	0	1	0	0	0	0	0	0	0	0	0	0	0	0	0	0	0	0	0	0	0	0	0	0	0	0	0	0	0	0	0	26	0	0	0	0	0	0
1646	MH816517	p:Proteobacteria	f:Pseudomonadaceae(0.3400)	g:Granulosicoccus(0.2900)	s:Simiduia_curdlanivorans(0.1700)		0	0	0	0	0	0	0	0	4	0	0	0	0	0	0	0	0	0	0	0	0	0	0	0	0	0	0	0	0	0	0	0	0	0	0	0	0	0	0	0	0	0	0
1648	MH816518	p:Bacteroidetes	f:Flavobacteriaceae(0.9900)	g:Moheibacter(0.6800)	s:Moheibacter_sediminis(0.6800)		0	0	0	0	0	0	0	0	0	0	0	0	0	0	0	0	0	0	0	0	0	0	0	0	0	0	0	0	0	0	0	0	0	0	0	0	0	0	0	0	0	0	0
1649	MH816519	p:Chloroflexi	f:Caldilineaceae(1.0000)	g:Litorilinea(0.9700)	s:Litorilinea_aerophila(0.9700)		0	0	0	0	0	0	0	0	0	0	0	0	0	0	0	0	0	0	0	0	0	0	0	0	0	0	0	0	0	0	0	0	0	0	0	0	0	0	0	0	0	0	0
1650	MH816520	p:Verrucomicrobia	f:Unclassified_Spartobacteria(0.9800)	g:Terrimicrobium(0.9800)	s:Terrimicrobium_sacchariphilum(0.9800)		0	0	0	0	0	0	0	0	0	0	0	0	0	0	0	0	0	0	0	0	0	0	0	0	0	0	0	0	0	0	0	0	0	0	0	0	0	0	0	0	0	0	0
1651	MH816521	p:Firmicutes	f:Ruminococcaceae(0.5200)	g:Clostridium(0.2900)	s:Hydrogenoanaerobacterium_saccharovorans(0.1500)		0	0	0	0	0	0	20	0	0	0	0	0	0	0	0	0	0	0	0	0	0	0	0	0	0	0	0	0	0	0	0	0	0	0	0	0	0	0	0	0	0	0	0
1652	MH816522	p:Firmicutes	f:Clostridiaceae(1.0000)	g:Fusicatenibacter(1.0000)	s:Fusicatenibacter_saccharivorans(1.0000)		0	0	0	0	0	0	2	0	0	0	0	0	0	0	0	0	0	0	0	0	0	0	0	0	0	0	0	0	0	0	0	0	0	0	0	0	0	0	0	0	0	0	0
1653	MH816523	p:Chloroflexi	f:Caldilineaceae(0.8600)	g:Litorilinea(0.8100)	s:Litorilinea_aerophila(0.8100)		0	0	0	0	0	0	0	0	6	0	0	0	0	0	0	0	0	0	0	0	0	0	0	0	0	0	0	0	0	0	0	0	0	0	0	0	0	0	0	0	0	0	0
1655	MH816524	p:Proteobacteria	f:Lysobacteraceae(0.1800)	g:Cardiobacterium(0.1000)	s:Cardiobacterium_hominis(0.0900)		0	0	0	0	0	0	0	0	5	0	0	0	0	0	0	0	0	0	0	0	0	0	0	0	0	0	0	0	0	0	0	0	0	0	0	0	0	0	0	0	0	0	0
1656	MH816525	p:Firmicutes	f:Veillonellaceae(1.0000)	g:Veillonella(1.0000)	s:Veillonella_atypica(1.0000)		0	0	0	0	0	62	5	0	8	0	0	0	0	0	0	0	0	0	0	0	0	0	0	0	0	0	0	0	0	0	0	0	0	0	0	0	0	0	0	0	0	0	0
1657	MH816526	p:Firmicutes	f:Ruminococcaceae(0.7900)	g:Anaerofilum(0.6600)	s:Anaerofilum_agile(0.6600)		0	0	0	0	0	0	2	0	0	0	0	0	0	0	0	0	0	0	0	0	0	0	0	0	0	0	0	0	0	0	0	0	0	0	0	0	0	0	0	0	0	0	0
1661	MH816527	p:Firmicutes	f:Ruminococcaceae(0.3900)	g:Clostridium(0.2600)	s:Anaerotruncus_colihominis(0.1300)		0	0	0	0	0	0	25	0	0	0	0	0	0	0	0	0	0	0	0	0	0	0	0	0	0	0	0	0	0	0	0	0	0	0	0	0	0	0	0	0	0	0	0
1663	MH816528	p:Proteobacteria	f:Enterobacteriaceae(1.0000)	g:Providencia(0.9700)	s:Providencia_alcalifaciens(0.9700)		0	0	0	0	0	0	11	0	0	0	0	0	0	0	0	0	0	0	0	3	1	2	2	0	1	0	0	0	0	0	0	0	0	0	0	0	0	0	0	0	0	0	0
1665	MH816529	p:Bacteroidetes	f:Rikenellaceae(0.5200)	g:Mucinivorans(0.2600)	s:Mucinivorans_hirudinis(0.2600)		0	0	0	0	0	0	19	0	0	0	0	0	0	0	0	0	0	0	0	0	0	0	0	0	0	0	0	0	0	0	0	0	0	0	0	0	0	0	0	0	0	0	0
1669	MH816530	p:Firmicutes	f:Bacillaceae(0.9100)	g:Bacillus(0.8800)	s:Bacillus_decisifrondis(0.7300)		0	0	0	0	0	0	46	0	0	0	0	0	13	0	0	0	0	0	0	0	0	0	0	0	0	0	0	0	0	2	0	0	0	0	0	0	0	0	0	0	0	0	0
1670	MH816531	p:Verrucomicrobia	f:Opitutaceae(0.7500)	g:Opitutus(0.5000)	s:Opitutus_terrae(0.5000)		0	2	2	0	0	0	0	0	4	0	33	0	1	0	0	29	35	0	0	0	0	0	0	0	0	0	0	0	0	0	0	0	0	0	0	0	0	0	0	0	0	0	0
1673	MH816532	p:Actinobacteria	f:Acidothermaceae(0.2600)	g:Acidothermus(0.2600)	s:Acidothermus_cellulolyticus(0.2600)		0	0	0	0	0	0	0	0	0	0	0	0	0	0	3	0	0	0	0	0	0	0	0	0	0	0	0	0	0	0	0	0	0	0	0	0	0	0	0	0	0	0	0
1674	MH816533	p:Proteobacteria	f:Bacteriovoracaceae(1.0000)	g:Peredibacter(1.0000)	s:Peredibacter_starrii(1.0000)		0	0	0	0	0	0	0	0	0	0	0	0	0	0	2	0	0	0	0	0	0	0	0	0	0	0	0	0	0	0	0	0	0	0	0	0	0	0	0	0	0	0	0
1675	MH816534	p:Firmicutes	f:Lachnospiraceae(0.1500)	g:Anaerostipes(0.0900)	s:Anaerostipes_caccae(0.0600)		0	0	0	0	0	0	0	0	0	0	0	0	0	0	3	0	0	0	0	0	0	0	0	0	0	0	0	0	0	0	0	0	0	0	0	0	0	0	0	0	0	0	0
1676	MH816535	p:Gemmatimonadetes	f:Gemmatimonadaceae(0.9300)	g:Gemmatimonas(0.9300)	s:Gemmatimonas_aurantiaca(0.9300)		0	0	0	0	0	0	0	0	0	0	0	0	0	0	6	0	0	0	0	0	0	0	0	0	0	0	0	0	0	0	0	0	0	0	0	0	0	0	0	0	0	0	0
1677	MH816536	p:Firmicutes	f:Enterococcaceae(0.9700)	g:Enterococcus(0.9500)	s:Enterococcus_canintestini(0.2900)		0	0	0	0	9	5	88	0	0	0	0	62	0	1	0	0	0	0	0	0	1	2	0	0	2	2	0	0	0	0	0	0	0	0	0	0	0	0	0	0	0	0	0
1678	MH816537	p:Proteobacteria	f:Rhodanobacteraceae(1.0000)	g:Rhodanobacter(0.7800)	s:Rhodanobacter_glycinis(0.3800)		0	0	1	0	0	0	36	0	0	0	0	0	0	0	0	0	0	4	0	0	0	0	0	0	0	0	0	0	0	0	0	0	0	0	0	0	0	0	0	0	0	0	0
1684	MH816538	p:Bacteroidetes	f:Bacteroidaceae(0.9300)	g:Bacteroides(0.9300)	s:Bacteroides_luti(0.3100)		0	0	0	0	0	0	2	0	0	0	0	0	0	0	0	0	0	0	0	0	0	0	0	0	0	0	0	0	0	0	0	0	0	0	0	0	0	0	0	0	0	0	0
1685	MH816539	p:Firmicutes	f:Clostridiaceae(0.7400)	g:Anaerosporobacter(0.3700)	s:Anaerosporobacter_mobilis(0.3700)		0	0	0	0	0	0	6	0	0	0	0	0	0	0	0	0	0	0	0	0	0	0	0	0	0	0	0	0	0	0	0	0	0	0	0	0	0	0	0	0	0	0	0
1690	MH816540	p:Proteobacteria	f:Rhodobacteraceae(1.0000)	g:Paracoccus(1.0000)	s:Paracoccus_sphaerophysae(0.8400)		0	0	0	0	0	0	9	0	0	0	0	55	0	0	0	0	0	0	0	0	0	0	0	0	0	1	0	0	0	5	0	3	0	0	0	0	0	0	0	0	0	0	0
1691	MH816541	p:Proteobacteria	f:Rhodobacteraceae(1.0000)	g:Frigidibacter(0.2700)	s:Frigidibacter_albus(0.2700)		0	0	0	0	0	0	0	0	0	0	0	38	0	0	0	0	0	0	0	0	0	0	0	0	0	0	0	0	0	0	0	0	0	0	0	0	0	0	0	0	0	0	0
1692	MH816542	p:Firmicutes	f:Streptococcaceae(1.0000)	g:Streptococcus(1.0000)	s:Streptococcus_equinus(0.6800)		0	0	0	0	0	0	12	0	0	0	0	0	0	0	0	0	0	0	0	0	0	0	0	0	0	0	0	0	0	0	0	0	0	0	0	0	0	0	0	0	0	0	0
1693	MH816543	p:Bacteroidetes	f:Porphyromonadaceae(0.7900)	g:Parabacteroides(0.4700)	s:Parabacteroides_johnsonii(0.2100)		0	0	0	0	0	0	13	0	0	0	0	0	0	0	0	0	0	0	0	0	0	0	0	0	0	0	0	0	0	0	0	0	0	0	0	0	0	0	0	0	0	0	0
1694	MH816544	p:Firmicutes	f:Clostridiaceae(0.6700)	g:Brassicibacter(0.3000)	s:Brassicibacter_mesophilus(0.3000)		0	0	0	0	0	0	3	0	0	0	0	0	0	0	0	0	0	0	0	0	0	0	0	0	0	0	0	0	0	0	0	0	0	0	0	0	0	0	0	0	0	0	0
1695	MH816545	p:Bacteroidetes	f:Saprospiraceae(0.6600)	g:Lewinella(0.3600)	s:Lewinella_nigricans(0.3500)		0	0	0	0	0	0	3	0	0	0	0	0	0	0	0	0	0	0	0	0	0	0	0	0	0	0	0	0	0	0	0	0	0	0	0	0	0	0	0	0	0	0	0
1696	MH816546	p:Bacteroidetes	f:Porphyromonadaceae(0.9100)	g:Parabacteroides(0.7000)	s:Parabacteroides_johnsonii(0.3800)		0	0	0	0	0	0	14	0	0	0	0	0	0	0	0	0	0	0	0	0	0	0	0	0	0	0	0	0	0	0	0	0	0	0	0	0	0	0	0	0	0	0	0
1697	MH816547	p:Firmicutes	f:Lactobacillaceae(1.0000)	g:Lactobacillus(1.0000)	s:Lactobacillus_fornicalis(1.0000)		0	0	0	0	17	0	0	0	0	0	0	0	0	0	0	0	0	0	0	0	0	0	0	0	0	0	0	0	0	0	0	0	0	0	0	0	0	0	0	0	0	0	0
1698	MH816548	p:Proteobacteria	f:Burkholderiaceae(1.0000)	g:Burkholderia(1.0000)	s:Burkholderia_heleia(0.4100)		0	0	0	0	0	0	33	0	0	0	0	0	0	0	0	0	0	0	0	0	2	0	0	0	0	0	0	0	0	0	0	0	0	0	0	0	0	0	0	0	0	0	0
1699	MH816549	p:Proteobacteria	f:Aurantimonadaceae(0.7000)	g:Aureimonas(0.6400)	s:Aureimonas_phyllosphaerae(0.3100)		1	6	14	0	0	0	0	0	3	0	0	0	0	0	1	0	0	0	0	0	0	0	0	0	0	0	0	0	0	0	0	0	0	0	0	0	0	0	0	0	0	0	0
1702	MH816550	p:Planctomycetes	f:Planctomycetaceae(0.9500)	g:Rubinisphaera(0.8900)	s:Rubinisphaera_brasiliensis(0.8900)		0	0	0	0	0	0	0	0	0	0	0	0	0	3	0	0	0	0	0	0	0	0	0	0	0	0	0	0	0	0	0	0	0	0	0	0	0	0	0	0	0	0	0
1703	MH816551	p:Proteobacteria	f:Burkholderiaceae(1.0000)	g:Burkholderia(1.0000)	s:Burkholderia_eburnea(0.4900)		0	0	0	0	0	0	8	0	0	0	0	0	0	0	0	0	0	0	0	0	0	0	0	0	0	0	0	0	0	0	0	0	0	0	0	0	0	0	0	0	0	0	0
1704	MH816552	p:Proteobacteria	f:Comamonadaceae(0.9100)	g:Comamonas(0.6300)	s:Comamonas_jiangduensis(0.6000)		0	0	0	0	16	0	9	0	0	0	0	0	0	0	0	0	0	0	0	0	0	0	0	0	0	0	0	0	0	0	0	0	0	0	0	0	0	0	0	0	0	0	0
1705	MH816553	p:Proteobacteria	f:Moraxellaceae(1.0000)	g:Acinetobacter(1.0000)	s:Acinetobacter_johnsonii(0.3500)		0	0	0	0	0	0	2	0	0	0	0	0	0	0	0	0	0	0	0	0	0	0	0	0	0	0	0	0	0	0	0	0	0	0	0	0	0	0	0	0	0	0	0
1706	MH816554	p:Proteobacteria	f:Unclassified_Gammaproteobacteria(0.3700)	g:Thiohalobacter(0.3400)	s:Thiohalobacter_thiocyanaticus(0.3400)		0	0	0	0	0	0	3	0	0	0	0	0	0	0	0	0	0	0	0	0	0	0	0	0	0	0	0	0	0	0	0	0	0	0	0	0	0	0	0	0	0	0	0
1707	MH816555	p:Bacteroidetes	f:Sphingobacteriaceae(1.0000)	g:Sphingobacterium(0.9900)	s:Sphingobacterium_spiritivorum(0.9800)		0	1	2	0	0	0	0	0	0	0	0	0	0	0	0	0	0	0	0	0	0	0	0	0	0	0	0	0	0	0	0	0	0	0	0	0	0	0	0	0	0	0	0
1708	MH816556	p:Planctomycetes	f:Planctomycetaceae(1.0000)	g:Aquisphaera(0.5900)	s:Aquisphaera_giovannonii(0.5900)		0	1	4	0	0	0	0	0	0	0	0	0	0	0	0	0	0	0	0	0	0	0	0	0	0	0	0	0	0	0	0	0	0	0	0	0	0	0	0	0	0	0	0
1709	MH816557	p:Firmicutes	f:Enterococcaceae(0.8200)	g:Enterococcus(0.8100)	s:Enterococcus_aquimarinus(0.1800)		0	0	0	0	0	0	3	0	0	0	0	1	0	0	0	0	0	0	0	0	0	0	0	0	0	0	0	0	0	0	0	0	0	0	0	0	0	0	0	0	0	0	0
1710	MH816558	p:Firmicutes	f:Clostridiaceae(0.1600)	g:Eubacterium(0.1200)	s:Eubacterium_yurii_subsp._margaretiae(0.1000)		0	0	0	0	0	0	2	0	0	0	0	0	0	0	0	0	0	0	0	0	0	0	0	0	0	0	0	0	0	0	0	0	0	0	0	0	0	0	0	0	0	0	0
1711	MH816559	p:Bacteroidetes	f:Porphyromonadaceae(0.8800)	g:Parabacteroides(0.7500)	s:Parabacteroides_johnsonii(0.4100)		0	0	0	0	0	1	4	0	0	0	0	0	0	0	0	0	0	0	0	0	0	0	0	0	0	0	0	0	0	0	0	0	0	0	0	0	0	0	0	0	0	0	0
1714	MH816560	p:Proteobacteria	f:Rhizobiaceae(0.9500)	g:Rhizobium(0.9500)	s:Rhizobium_calliandrae(0.9500)		0	1	1	0	1	0	0	0	0	0	0	0	0	0	0	0	0	0	0	0	0	0	0	0	0	0	0	0	0	0	0	0	0	0	0	0	0	0	0	0	0	0	0
1715	MH816561	p:Actinobacteria	f:Acidomicrobiaceae(0.7300)	g:Aciditerrimonas(0.7300)	s:Aciditerrimonas_ferrireducens(0.7300)		0	0	0	0	0	0	2	0	0	0	0	0	0	0	0	0	0	0	0	0	0	0	0	0	0	0	0	0	0	0	0	0	0	0	0	0	0	0	0	0	0	0	0
1716	MH816562	p:Bacteroidetes	f:Prevotellaceae(0.9900)	g:Alloprevotella(0.9400)	s:Alloprevotella_rava(0.7000)		0	0	0	0	0	0	2	0	0	0	0	0	0	0	0	0	0	0	0	0	0	0	0	0	0	0	0	0	0	0	0	0	0	0	0	0	0	0	0	0	0	0	0
1717	MH816563	p:Proteobacteria	f:Lysobacteraceae(0.9800)	g:Luteimonas(0.6500)	s:Luteimonas_abyssi(0.3500)		0	0	2	0	1	0	0	0	0	0	0	0	0	0	0	0	0	0	0	0	0	0	0	0	0	0	0	0	0	0	0	0	0	0	0	0	0	0	0	0	0	0	0
1718	MH816564	p:Proteobacteria	f:Haliangiaceae(0.9000)	g:Haliangium(0.9000)	s:Haliangium_ochraceum(0.8300)		0	0	0	0	0	0	0	0	0	0	0	0	0	5	0	0	0	0	0	0	0	0	0	0	0	0	0	0	0	0	0	0	0	0	0	0	0	0	0	0	0	0	0
1722	MH816565	p:Firmicutes	f:Eubacteriaceae(0.4700)	g:Eubacterium(0.4600)	s:Eubacterium_coprostanoligenes(0.4600)		0	0	0	0	0	0	3	0	0	0	0	0	0	0	0	0	0	0	0	0	0	0	0	0	0	0	0	0	0	0	0	0	0	0	0	0	0	0	0	0	0	0	0
1724	MH816566	p:Actinobacteria	f:Nocardioidaceae(1.0000)	g:Nocardioides(0.9800)	s:Nocardioides_hwasunensis(0.7300)		0	1	8	0	0	0	1	0	0	0	0	0	0	0	4	0	0	0	0	0	0	0	0	0	0	0	0	0	0	0	0	0	0	0	0	0	0	0	0	0	0	0	0
1726	MH816567	p:Firmicutes	f:Ruminococcaceae(0.6700)	g:Anaerofilum(0.4400)	s:Anaerofilum_agile(0.4400)		0	0	0	0	0	0	25	0	0	0	0	0	0	0	0	0	0	0	0	0	0	0	0	0	0	0	0	0	0	0	0	0	0	0	0	0	0	0	0	0	0	0	0
1735	MH816568	p:Firmicutes	f:Acholeplasmataceae(0.1200)	g:Acholeplasma(0.1200)	s:Acholeplasma_modicum(0.1000)		0	0	0	0	0	0	0	0	0	0	0	0	0	0	0	1	0	0	0	0	0	0	0	0	0	0	0	0	0	0	0	0	0	0	0	0	1	0	0	0	0	0	0
1736	MH816569	p:Proteobacteria	f:Pseudomonadaceae(1.0000)	g:Pseudomonas(0.9900)	s:Pseudomonas_asturiensis(0.7200)		0	0	0	0	0	0	2	0	0	0	0	0	0	0	0	0	0	0	0	0	0	0	0	0	0	0	0	0	0	0	0	0	0	0	0	0	0	0	0	0	0	0	0
1737	MH816570	p:Proteobacteria	f:Rhodanobacteraceae(0.9900)	g:Dokdonella(0.9900)	s:Dokdonella_immobilis(0.9000)		0	0	0	0	0	9	0	0	0	0	0	0	0	0	0	0	36	0	0	0	0	0	0	0	0	0	0	0	0	0	0	0	0	0	0	0	0	0	0	0	0	0	0
1739	MH816571	p:Bacteroidetes	f:Rikenellaceae(0.8400)	g:Alistipes(0.7400)	s:Alistipes_indistinctus(0.3100)		0	0	0	0	0	0	5	0	0	0	0	0	0	0	0	0	0	0	0	0	0	0	0	0	0	0	0	0	0	0	0	0	0	0	0	0	0	0	0	0	0	0	0
1740	MH816572	p:Planctomycetes	f:Planctomycetaceae(0.9500)	g:Rubinisphaera(0.5900)	s:Rubinisphaera_brasiliensis(0.5900)		0	0	0	0	0	0	0	4	0	0	0	0	0	0	0	0	0	0	0	0	0	0	0	0	0	0	0	0	0	0	0	0	0	0	0	0	0	0	0	0	0	0	0
1747	MH816573	p:Firmicutes	f:Bacillaceae(0.9800)	g:Bacillus(0.8900)	s:Bacillus_alkalitelluris(0.3300)		0	0	0	0	0	0	0	0	0	0	0	0	0	0	0	0	0	0	0	0	0	0	2	0	0	0	0	0	0	0	0	0	0	0	0	0	0	0	0	0	0	0	0
1748	MH816574	p:Proteobacteria	f:Pseudomonadaceae(1.0000)	g:Pseudomonas(0.8600)	s:Pseudomonas_alcaliphila(0.8600)		0	4	6	0	0	0	2	0	0	0	0	0	0	0	0	2	14	0	0	0	0	0	0	0	0	0	0	0	0	0	0	0	0	0	0	0	1	0	0	0	0	0	0
1749	MH816575	p:Proteobacteria	f:Legionellaceae(1.0000)	g:Legionella(1.0000)	s:Legionella_tunisiensis(0.1700)		0	0	0	0	0	0	0	0	0	0	0	0	5	0	0	0	0	0	0	0	0	0	0	0	0	0	0	0	0	0	0	0	0	0	0	0	0	0	0	0	0	0	0
1756	MH816576	p:Proteobacteria	f:Acetobacteraceae(0.9900)	g:Acidicaldus(0.2200)	s:Acidicaldus_organivorans(0.2200)		0	0	0	0	0	0	2	0	0	0	0	0	0	0	0	0	0	0	0	0	0	0	0	0	0	0	0	0	0	0	0	0	0	0	0	0	0	0	0	0	0	0	0
1757	MH816577	p:Firmicutes	f:Clostridiaceae(0.1900)	g:Clostridium(0.1500)	s:Alloprevotella_tannerae(0.0800)		0	0	0	0	0	0	0	0	0	0	0	0	0	0	0	0	0	0	0	0	0	0	0	0	0	0	0	0	0	0	0	3	0	0	0	0	0	0	0	0	0	0	0
1760	MH816578	p:Planctomycetes	f:Planctomycetaceae(1.0000)	g:Aquisphaera(1.0000)	s:Aquisphaera_giovannonii(1.0000)		0	0	0	0	0	0	2	0	0	0	0	0	0	0	0	0	0	0	0	0	0	0	0	0	0	0	0	0	0	0	0	0	0	0	0	0	0	0	0	0	0	0	0
1761	MH816579	p:Bacteroidetes	f:Rikenellaceae(0.5500)	g:Alistipes(0.3700)	s:Alistipes_indistinctus(0.3300)		0	0	0	0	0	0	2	0	0	0	0	0	0	0	0	0	0	0	0	0	0	0	0	0	0	0	0	0	0	0	0	0	0	0	0	0	0	0	0	0	0	0	0
1762	MH816580	p:Proteobacteria	f:Comamonadaceae(1.0000)	g:Comamonas(0.9200)	s:Comamonas_humi(0.7500)		0	0	0	0	0	3	9	1	0	3	1	0	0	0	0	0	0	0	0	0	0	0	0	0	0	0	0	0	0	0	0	0	0	0	0	0	0	0	0	0	0	0	0
1764	MH816581	p:Synergistetes	f:Synergistaceae(0.1600)	g:Vampirovibrio(0.1400)	s:Vampirovibrio_chlorellavorus(0.1400)		0	0	0	0	0	0	0	0	0	0	0	0	4	0	0	0	0	0	0	0	0	0	0	0	0	0	0	0	0	0	0	0	0	0	0	0	0	0	0	0	0	0	0
1766	MH816582	p:Firmicutes	f:Ruminococcaceae(0.4800)	g:Clostridium(0.3400)	s:Acetanaerobacterium_elongatum(0.2000)		0	0	0	0	0	0	3	0	0	0	0	0	0	0	0	0	0	0	0	0	0	0	0	0	0	0	0	0	0	0	0	0	0	0	0	0	0	0	0	0	0	0	0
1767	MH816583	p:Firmicutes	f:Enterococcaceae(0.9800)	g:Vagococcus(0.9400)	s:Vagococcus_fluvialis(0.7900)		0	0	0	0	0	0	3	0	0	0	0	0	0	0	0	0	0	0	0	0	0	0	0	0	0	0	0	0	0	0	0	0	0	0	0	0	0	0	0	0	0	0	0
1768	MH816584	p:Proteobacteria	f:Rhodospirillaceae(0.1700)	g:Anaeromyxobacter(0.1400)	s:Anaeromyxobacter_dehalogenans(0.1400)		0	0	0	0	0	0	0	2	0	0	0	0	0	0	0	0	0	0	0	0	0	0	0	0	0	0	0	0	0	0	0	0	0	0	0	0	0	0	0	0	0	0	0
1769	MH816585	p:Firmicutes	f:Bacillaceae(0.9600)	g:Bacillus(0.8400)	s:Bacillus_decisifrondis(0.7600)		5	0	0	0	0	0	1	0	0	0	0	0	0	0	0	0	0	0	0	0	0	0	0	0	0	0	0	0	0	0	0	0	0	0	0	0	0	0	0	0	0	0	0
1770	MH816586	p:Tenericutes	f:Mycoplasmataceae(0.2600)	g:Mycoplasma(0.2500)	s:Anaerobiospirillum_thomasii(0.1400)		0	0	0	0	0	0	0	0	4	0	0	0	0	0	0	0	0	0	0	0	0	0	0	0	0	0	0	0	0	0	0	0	0	0	0	0	0	0	0	0	0	0	0
1773	MH816587	p:Proteobacteria	f:Legionellaceae(1.0000)	g:Legionella(1.0000)	s:Legionella_adelaidensis(0.2900)		0	0	0	0	0	0	0	0	3	0	0	0	0	0	0	0	0	0	0	0	0	0	0	0	0	0	0	0	0	0	0	0	0	0	0	0	0	0	0	0	0	0	0
1775	MH816588	p:Bacteroidetes	f:Porphyromonadaceae(0.8900)	g:Parabacteroides(0.7000)	s:Parabacteroides_johnsonii(0.5600)		0	0	0	0	0	0	8	0	0	0	0	0	0	0	0	0	0	0	0	0	0	0	0	0	0	0	0	0	0	0	0	0	0	0	0	0	0	0	0	0	0	0	0
1780	MH816589	p:Acidobacteria	f:Bryobacteraceae	g:Paludibaculum(1.0000)	s:Paludibaculum_fermentans(1.0000)		0	1	2	0	0	0	0	0	0	0	0	0	0	0	0	0	0	0	0	0	0	0	0	0	0	0	0	0	0	0	0	0	0	0	0	0	0	0	0	0	0	0	0
1781	MH816590	p:Proteobacteria	f:Coxiellaceae(0.7600)	g:Coxiella(0.7600)	s:Coxiella_burnetii(0.7600)		0	0	0	0	0	0	2	0	0	0	0	0	0	0	0	0	0	0	0	0	0	0	0	0	0	0	0	0	0	0	0	0	0	0	0	0	0	0	0	0	0	0	0
1782	MH816591	p:Firmicutes	f:Clostridiaceae(0.1800)	g:Clostridium(0.1600)	s:Clostridium_cocleatum(0.1100)		0	0	0	0	0	0	0	0	0	0	0	0	0	0	0	0	0	0	0	0	0	0	0	0	0	0	0	0	0	4	0	0	0	0	0	0	0	0	0	1	0	0	0
1785	MH816592	p:Proteobacteria	f:Unclassified_Rhizobiales(0.9500)	g:Bauldia(0.9500)	s:Bauldia_consociata(0.9500)		0	0	2	0	0	0	0	0	0	0	0	0	0	0	0	0	0	4	0	0	0	0	0	0	0	0	0	0	0	0	0	0	0	0	0	0	0	0	0	0	0	0	0
1786	MH816593	p:Bacteroidetes	f:Porphyromonadaceae(0.8900)	g:Parabacteroides(0.7500)	s:Parabacteroides_faecis(0.3800)		0	0	0	0	0	1	10	0	0	0	0	0	0	0	0	0	0	0	0	0	0	0	0	0	0	0	0	0	0	0	0	0	0	0	0	0	0	0	0	0	0	0	0
1787	MH816594	p:Bacteroidetes	f:Porphyromonadaceae(0.9900)	g:Dysgonomonas(0.9900)	s:Dysgonomonas_hofstadii(0.4800)		0	0	0	0	0	0	5	0	0	0	0	0	0	0	0	0	0	0	0	0	0	0	0	0	0	0	0	0	0	0	0	0	0	0	0	0	0	0	0	0	0	0	0
1788	MH816595	p:Proteobacteria	f:Lysobacteraceae(0.6100)	g:Stenotrophomonas(0.6100)	s:Stenotrophomonas_acidaminiphila(0.6100)		0	11	32	0	29	5	1	0	0	0	0	0	0	0	0	0	10	7	0	0	0	0	0	0	0	0	0	0	0	0	0	0	0	0	0	0	0	0	0	0	0	0	0
1794	MH816596	p:Bacteroidetes	f:Unclassified_Cytophagales(1.0000)	g:Chryseolinea(0.9900)	s:Chryseolinea_serpens(0.9900)		0	1	3	0	0	0	0	0	0	0	0	0	0	0	0	0	0	0	0	0	0	0	0	0	0	0	0	0	0	0	0	0	0	0	0	0	0	0	0	0	0	0	0
1797	MH816597	p:Actinobacteria	f:Micrococcaceae(0.0600)	g:Deferrisoma(0.0500)	s:Deferrisoma_camini(0.0500)		0	0	0	0	0	0	0	0	0	0	0	0	0	4	0	0	0	0	0	0	0	0	0	0	0	0	0	0	0	0	0	0	0	0	0	0	0	0	0	0	0	0	0
1799	MH816598	p:Proteobacteria	f:Sphingomonadaceae(0.8100)	g:Sphingobium(0.3900)	s:Sphingobium_fontiphilum(0.2100)		0	1	2	0	0	0	0	0	0	0	0	0	0	0	0	0	0	0	0	0	0	0	0	0	0	0	0	0	0	0	0	0	0	0	0	0	0	0	0	0	0	0	0
1800	MH816599	p:Bacteroidetes	f:Chitinophagaceae(1.0000)	g:Ferruginibacter(0.3200)	s:Ferruginibacter_lapsinanis(0.2800)		0	0	1	0	0	0	0	0	0	0	0	0	0	3	0	0	4	0	0	0	0	0	0	0	0	0	0	0	0	0	0	0	0	0	0	0	0	0	0	0	0	0	0
1801	MH816600	p:Nitrospirae	f:Nitrospiraceae(0.4600)	g:Thermodesulfovibrio(0.4400)	s:Thermodesulfovibrio_aggregans(0.2100)		0	0	0	0	0	0	0	0	0	0	0	0	0	0	0	0	0	0	0	0	0	0	0	0	0	0	0	0	0	2	0	0	0	0	0	0	0	0	0	0	0	0	0
1805	MH816601	p:Firmicutes	f:Defluviitaleaceae(0.3300)	g:Defluviitalea(0.3300)	s:Defluviitalea_saccharophila(0.3300)		0	0	0	0	0	0	2	0	0	0	0	0	0	0	0	0	0	0	0	0	0	0	0	0	0	0	0	0	0	0	0	0	0	0	0	0	0	0	0	0	0	0	0
1808	MH816602	p:Proteobacteria	f:Ectothiorhodospiraceae(0.2000)	g:Aquisalimonas(0.1300)	s:Aquisalimonas_asiatica(0.1100)		0	5	2	0	0	0	0	0	0	0	0	0	0	0	0	0	0	0	0	0	0	0	0	0	0	0	0	0	0	0	0	0	0	0	0	0	0	0	0	0	0	0	0
1813	MH816603	p:Proteobacteria	f:Comamonadaceae(1.0000)	g:Acidovorax(1.0000)	s:Acidovorax_caeni(1.0000)		0	1	1	0	0	0	1	0	0	25	7	0	0	0	0	0	0	3	0	0	1	0	1	0	0	0	0	0	0	0	0	0	0	0	0	0	0	0	0	0	0	0	0
1814	MH816604	p:Bacteroidetes	f:Chitinophagaceae(1.0000)	g:Niabella(0.6800)	s:Niabella_soli(0.6500)		0	0	2	0	0	0	0	0	0	0	0	0	0	0	0	0	0	0	0	0	0	0	0	0	0	0	0	0	0	0	0	0	0	0	0	0	0	0	0	0	0	0	0
1815	MH816605	p:Proteobacteria	f:Rhodospirillaceae(0.2300)	g:Parvibaculum(0.0900)	s:Taonella_mepensis(0.0900)		0	0	2	0	0	0	0	0	0	0	0	0	0	0	0	0	0	0	0	0	0	0	0	0	0	0	0	0	0	0	0	0	0	0	0	0	0	0	0	0	0	0	0
1817	MH816606	p:Bacteroidetes	f:Porphyromonadaceae(0.9600)	g:Parabacteroides(0.8200)	s:Parabacteroides_johnsonii(0.3200)		0	0	0	0	0	0	16	0	0	0	0	0	0	0	0	0	0	0	0	0	2	0	0	0	0	0	0	0	0	0	0	0	0	0	0	0	0	0	0	0	0	0	0
1819	MH816607	p:Bacteroidetes	f:Flavobacteriaceae(0.2100)	g:Mycoplasma(0.0700)	s:Chrysiogenes_arsenatis(0.0400)		0	0	0	0	0	3	0	0	0	0	0	0	0	0	0	0	0	0	0	0	0	0	0	0	0	0	0	0	0	0	0	0	0	0	0	0	0	0	0	0	0	0	0
1826	MH816608	p:Proteobacteria	f:Halomonadaceae(0.2900)	g:Aidingimonas(0.1600)	s:Aidingimonas_halophila(0.1600)		0	0	0	0	0	0	2	0	0	0	0	0	0	0	0	0	0	0	0	0	0	0	0	0	0	0	0	0	0	0	0	0	0	0	0	0	0	0	0	0	0	0	0
1830	MH816609	p:Verrucomicrobia	f:Verrucomicrobiaceae(0.9800)	g:Haloferula(0.4900)	s:Luteolibacter_cuticulihirudinis(0.3600)		0	1	11	0	22	0	0	0	0	0	0	0	0	0	0	0	6	0	0	0	0	0	0	0	0	0	0	0	0	0	0	0	0	0	0	0	0	0	0	0	0	0	0
1833	MH816610	p:Proteobacteria	f:Acetobacteraceae(1.0000)	g:Acidisoma(1.0000)	s:Acidisoma_tundrae(0.6400)		0	0	0	0	0	0	2	0	0	0	0	0	0	0	0	0	0	0	0	0	0	0	0	0	0	0	0	0	0	0	0	0	0	0	0	0	0	0	0	0	0	0	0
1834	MH816611	p:Proteobacteria	f:Sphingomonadaceae(1.0000)	g:Sphingomonas(1.0000)	s:Sphingomonas_dokdonensis(0.4800)		0	9	16	0	0	0	1	0	3	0	0	0	0	0	0	0	33	0	0	0	0	0	0	0	0	0	0	0	0	0	0	0	0	0	0	0	0	0	0	0	0	0	0
1841	MH816612	p:Proteobacteria	f:Desulfovibrionaceae(0.3100)	g:Desulfovibrio(0.3100)	s:Desulfovibrio_tunisiensis(0.1500)		0	0	0	0	0	0	0	0	0	0	0	0	0	0	0	0	0	3	0	0	0	0	0	0	0	0	0	0	0	0	0	0	0	0	0	0	0	0	0	0	0	0	0
1842	MH816613	p:Proteobacteria	f:Campylobacteraceae(0.1500)	g:Campylobacter(0.1500)	s:Campylobacter_avium(0.0700)		0	0	0	0	0	0	0	0	0	0	0	0	0	0	0	0	0	0	0	0	0	0	0	0	0	0	0	0	0	3	0	0	0	0	0	0	0	0	0	0	0	0	0
1843	MH816614	p:Firmicutes	f:Peptococcaceae(0.1900)	g:Desulfotomaculum(0.1400)	s:Desulfotomaculum_australicum(0.0900)		0	0	0	0	0	0	0	0	0	0	0	0	0	0	0	0	4	0	0	0	0	0	0	0	0	0	0	0	0	0	0	0	0	0	0	0	0	0	0	0	0	0	0
1844	MH816615	p:Actinobacteria	f:Pseudonocardiaceae(0.3900)	g:Crossiella(0.2700)	s:Crossiella_cryophila(0.2700)		0	0	0	0	0	0	0	0	0	0	0	0	0	0	0	0	0	6	0	0	0	0	0	0	0	0	0	0	0	0	0	0	0	0	0	0	0	0	0	0	0	0	0
1845	MH816616	p:Proteobacteria	f:Ectothiorhodospiraceae(0.1100)	g:Cellvibrio(0.0800)	s:Cellvibrio_japonicus(0.0700)		0	0	0	0	0	0	0	0	0	0	0	0	0	0	0	0	0	2	0	0	0	0	0	0	0	0	0	0	0	0	0	0	0	0	0	0	0	0	0	0	0	0	0
1846	MH816617	p:Proteobacteria	f:Enterobacteriaceae(0.9800)	g:Serratia(0.6900)	s:Serratia_rubidaea(0.6300)		0	0	0	0	0	0	0	0	0	0	0	0	0	0	0	2	34	0	0	2	4	1	2	0	1	0	0	0	0	0	0	0	0	0	0	0	0	0	0	0	0	0	0
1849	MH816618	p:Proteobacteria	f:Desulfovibrionaceae(0.2100)	g:Desulfovibrio(0.2000)	s:Thermacetogenium_phaeum(0.1100)		0	0	0	0	0	0	0	0	0	0	0	0	0	0	0	0	2	0	0	0	0	0	0	0	0	0	0	0	0	0	0	0	0	0	0	0	0	0	0	0	0	0	0
1851	MH816619	p:Actinobacteria	f:Corynebacteriaceae(1.0000)	g:Corynebacterium(1.0000)	s:Corynebacterium_doosanense(0.9300)		0	0	0	0	0	0	0	0	0	0	0	0	0	0	0	124	0	0	0	0	0	0	0	0	0	0	0	0	0	0	0	0	0	0	0	0	0	0	0	0	0	0	0
1852	MH816620	p:Firmicutes	f:Ruminococcaceae(0.3600)	g:Clostridium(0.3000)	s:Anaerotruncus_colihominis(0.1500)		0	0	0	0	0	0	2	0	0	0	0	0	0	0	0	0	0	0	0	0	0	0	0	0	0	0	0	0	0	0	0	0	0	0	0	0	0	0	0	0	0	0	0
1854	MH816621	p:Proteobacteria	f:Rhodospirillaceae(0.5200)	g:Constrictibacter(0.3500)	s:Constrictibacter_antarcticus(0.3500)		0	0	0	0	0	0	0	0	0	0	0	0	0	0	4	0	0	0	0	0	0	0	0	0	0	0	0	0	0	0	0	0	0	0	0	0	0	0	0	0	0	0	0
1855	MH816622	p:Actinobacteria	f:Unclassified_Corynebacterineae(0.9800)	g:Tomitella(0.9800)	s:Tomitella_biformata(0.9800)		0	0	0	0	0	0	0	0	0	0	0	0	0	0	3	0	0	0	0	0	0	0	0	0	0	0	0	0	0	0	0	0	0	0	0	0	0	0	0	0	0	0	0
1856	MH816623	p:Bacteroidetes	f:Flavobacteriaceae(0.0800)	g:Acholeplasma(0.0400)	s:Actinomyces_hominis(0.0300)		0	0	0	0	0	0	0	0	0	0	0	0	5	0	0	0	9	4	0	0	0	0	0	0	0	0	0	0	0	0	0	0	0	0	0	0	0	0	0	0	0	0	0
1859	MH816624	p:Firmicutes	f:Unclassified_Thermoanaerobacterales(1.0000)	g:Thermoanaerobacterium(1.0000)	s:Thermoanaerobacterium_aotearoense(0.8800)		0	0	0	0	0	0	0	0	0	0	0	0	0	0	0	0	0	0	0	0	0	0	0	0	0	0	0	0	0	0	0	3	0	0	0	0	0	0	0	0	0	0	0
1860	MH816625	p:Chlamydiae	f:Parachlamydiaceae(0.3600)	g:Parachlamydia(0.3600)	s:Parachlamydia_acanthamoebae(0.3600)		0	0	0	0	0	0	0	0	0	0	0	0	0	0	4	0	0	0	0	0	0	0	0	0	0	0	0	0	0	0	0	0	0	0	0	0	0	0	0	0	0	0	0
1861	MH816626	p:Firmicutes	f:Ruminococcaceae(0.6400)	g:Anaerotruncus(0.2500)	s:Anaerotruncus_colihominis(0.2500)		0	0	0	0	0	0	2	0	0	0	0	0	0	0	0	0	0	0	0	0	0	0	0	0	0	0	0	0	0	0	0	0	0	0	0	0	0	0	0	0	0	0	0
1862	MH816627	p:Bacteroidetes	f:Flavobacteriaceae(0.1200)	g:Arenibacter(0.0600)	s:Arenibacter_nanhaiticus(0.0300)		0	0	0	0	0	0	0	0	0	0	0	0	0	0	0	0	0	0	0	0	0	0	0	0	0	0	0	0	0	0	0	4	0	0	0	0	0	0	0	0	0	0	0
1865	MH816628	p:Firmicutes	f:Veillonellaceae(1.0000)	g:Megasphaera(1.0000)	s:Megasphaera_micronuciformis(1.0000)		0	0	0	0	0	0	4	0	0	0	0	0	0	0	0	0	0	0	0	0	0	0	0	0	0	0	0	0	0	0	0	0	0	0	0	0	0	0	0	0	0	0	0
1868	MH816629	p:Bacteroidetes	f:Rikenellaceae(0.9300)	g:Alistipes(0.9100)	s:Alistipes_finegoldii(0.8700)		0	0	0	0	0	0	2	0	0	0	0	0	0	0	0	0	0	0	0	0	0	0	0	0	0	0	0	0	0	0	0	0	0	0	0	0	0	0	0	0	0	0	0
1869	MH816630	p:Bacteroidetes	f:Porphyromonadaceae(0.9700)	g:Parabacteroides(0.7900)	s:Parabacteroides_faecis(0.3000)		0	0	0	0	0	0	3	0	0	0	0	0	0	0	0	0	0	0	0	0	0	0	0	0	0	0	0	0	0	0	0	0	0	0	0	0	0	0	0	0	0	0	0
1874	MH816631	p:Proteobacteria	f:Rhodanobacteraceae(0.5700)	g:Dokdonella(0.5600)	s:Dokdonella_koreensis(0.4900)		0	0	0	0	0	0	2	0	0	0	0	0	0	0	0	0	0	0	0	0	0	0	0	0	0	0	0	0	0	0	0	0	0	0	0	0	0	0	0	0	0	0	0
1875	MH816632	p:Proteobacteria	f:Rickettsiaceae(0.9600)	g:Rickettsia(0.9200)	s:Rickettsia_aeschlimannii(0.9200)		0	0	0	0	0	0	2	0	0	0	0	0	0	0	0	0	0	0	0	0	0	0	0	0	0	0	0	0	0	0	0	0	0	0	0	0	0	0	0	0	0	0	0
1876	MH816633	p:Proteobacteria	f:Rhodobiaceae(0.5700)	g:Methyloligella(0.5000)	s:Methyloligella_halotolerans(0.5000)		0	0	0	0	0	0	0	0	3	0	0	0	0	0	0	0	0	0	0	0	0	0	0	0	0	0	0	0	0	0	0	0	0	0	0	0	0	0	0	0	0	0	0
1877	MH816634	p:Gemmatimonadetes	f:Gemmatimonadaceae(0.8000)	g:Gemmatimonas(0.8000)	s:Gemmatimonas_aurantiaca(0.8000)		0	0	0	0	0	0	0	0	4	0	0	0	0	0	0	0	0	0	0	0	0	0	0	0	0	0	0	0	0	0	0	0	0	0	0	0	0	0	0	0	0	0	0
1878	MH816635	p:Firmicutes	f:Clostridiaceae(0.1200)	g:Caloramator(0.0800)	s:Caloramator_proteoclasticus(0.0400)		0	0	0	0	0	0	0	0	2	0	0	0	0	0	0	0	0	0	0	0	0	0	0	0	0	0	0	0	0	0	0	0	0	0	0	0	0	0	0	0	0	0	0
1879	MH816636	p:Bacteroidetes	f:Cytophagaceae(1.0000)	g:Emticicia(1.0000)	s:Emticicia_ginsengisoli(0.5400)		0	2	0	0	0	0	0	0	0	0	0	0	0	0	0	0	0	0	0	0	0	0	0	0	0	0	0	0	0	0	0	0	0	0	0	0	0	0	0	0	0	0	0
1880	MH816637	p:Proteobacteria	f:Phyllobacteriaceae(0.4800)	g:Mesorhizobium(0.4800)	s:Mesorhizobium_abyssinicae(0.4600)		0	0	0	0	0	0	0	0	2	0	0	0	0	0	0	0	0	0	0	0	0	0	0	0	0	0	0	0	0	0	0	0	0	0	0	0	0	0	0	0	0	0	0
1881	MH816638	p:Proteobacteria	f:Desulfobacteraceae(0.2200)	g:Desulfonema(0.1500)	s:Desulfonema_ishimotonii(0.1500)		0	0	0	0	0	0	0	0	2	0	0	0	0	0	0	0	0	0	0	0	0	0	0	0	0	0	0	0	0	0	0	0	0	0	0	0	0	0	0	0	0	0	0
1882	MH816639	p:Bacteroidetes	f:Sphingobacteriaceae(1.0000)	g:Nubsella(0.9700)	s:Nubsella_zeaxanthinifaciens(0.9700)		0	6	7	0	0	0	0	0	0	0	0	0	7	0	11	0	0	0	0	0	0	0	0	0	0	0	0	0	0	0	0	0	0	0	0	0	14	0	0	0	0	0	0
1883	MH816640	p:Bacteroidetes	f:Chitinophagaceae(1.0000)	g:Parafilimonas(1.0000)	s:Parafilimonas_terrae(1.0000)		0	2	6	0	0	0	0	0	0	0	0	0	0	0	0	0	0	0	0	0	0	0	0	0	0	0	0	0	0	0	0	0	0	0	0	0	0	0	0	0	0	0	0
1884	MH816641	p:Actinobacteria	f:Conexibacteraceae(0.6500)	g:Conexibacter(0.6500)	s:Conexibacter_arvalis(0.4900)		0	0	0	0	0	0	6	0	0	0	0	0	0	0	0	0	0	0	0	0	0	0	0	0	0	0	0	0	0	0	0	0	0	0	0	0	0	0	0	0	0	0	0
1887	MH816642	p:Firmicutes	f:Paenibacillaceae(1.0000)	g:Paenibacillus(1.0000)	s:Paenibacillus_typhae(0.3500)		0	0	0	0	0	0	2	0	0	0	0	0	0	0	4	0	0	0	0	0	0	0	0	0	0	0	0	0	0	0	0	0	0	0	0	0	0	0	0	0	0	0	0
1888	MH816643	p:Firmicutes	f:Staphylococcaceae(1.0000)	g:Macrococcus(0.9600)	s:Macrococcus_caseolyticus(0.6700)		0	0	0	0	0	0	20	0	0	0	0	0	8	0	0	0	0	0	0	0	0	0	0	0	0	0	0	0	0	0	0	0	0	0	0	0	0	0	0	0	0	0	0
1889	MH816644	p:Proteobacteria	f:Rhodobacteraceae(0.2900)	g:Albimonas(0.1200)	s:Albimonas_pacifica(0.1200)		0	0	0	0	0	0	0	0	0	0	0	0	0	2	0	0	0	0	0	0	0	0	0	0	0	0	0	0	0	0	0	0	0	0	0	0	0	0	0	0	0	0	0
1891	MH816645	p:Proteobacteria	f:Legionellaceae(0.3000)	g:Legionella(0.3000)	s:Acidiferrobacter_thiooxydans(0.2100)		0	0	0	0	0	0	0	0	0	0	0	0	0	2	0	0	0	0	0	0	0	0	0	0	0	0	0	0	0	0	0	0	0	0	0	0	0	0	0	0	0	0	0
1896	MH816646	p:Bacteroidetes	f:Porphyromonadaceae(0.9800)	g:Parabacteroides(0.9600)	s:Parabacteroides_johnsonii(0.5800)		0	0	0	0	0	0	3	0	0	0	0	0	0	0	0	0	0	0	0	0	0	0	0	0	0	0	0	0	0	0	0	0	0	0	0	0	0	0	0	0	0	0	0
1902	MH816647	p:Chloroflexi	f:Caldilineaceae(0.6500)	g:Caldilinea(0.3500)	s:Caldilinea_aerophila(0.3500)		0	0	0	0	0	0	0	0	0	0	0	0	3	0	0	0	0	0	0	0	0	0	0	0	0	0	0	0	0	0	0	0	0	0	0	0	0	0	0	0	0	0	0
1903	MH816648	p:Firmicutes	f:Carnobacteriaceae(1.0000)	g:Alkalibacterium(1.0000)	s:Alkalibacterium_indicireducens(0.5800)		0	0	0	0	0	0	0	0	0	0	0	0	0	0	0	0	0	0	0	0	0	0	0	0	2	0	0	0	0	0	0	0	0	0	0	0	0	0	0	0	0	0	0
1904	MH816649	p:Verrucomicrobia	f:Unclassified_Spartobacteria(0.9300)	g:Terrimicrobium(0.9300)	s:Terrimicrobium_sacchariphilum(0.9300)		0	0	0	0	0	0	0	0	0	0	0	0	0	0	0	0	0	0	0	0	0	0	0	0	2	0	0	0	0	0	0	0	0	0	0	0	0	0	0	0	0	0	0
1907	MH816650	p:Actinobacteria	f:Conexibacteraceae(0.9000)	g:Conexibacter(0.9000)	s:Conexibacter_arvalis(0.5800)		0	0	0	0	0	0	2	0	0	0	0	0	0	0	0	0	0	0	0	0	0	0	0	0	0	0	0	0	0	0	0	0	0	0	0	0	0	0	0	0	0	0	0
1909	MH816651	p:Bacteroidetes	f:Porphyromonadaceae(0.9500)	g:Dysgonomonas(0.4900)	s:Dysgonomonas_gadei(0.3800)		0	0	0	0	0	0	10	0	0	0	0	0	0	0	0	0	0	0	0	0	0	0	0	0	0	0	0	0	0	0	0	0	0	0	0	0	0	0	0	0	0	0	0
1913	MH816652	p:Bacteroidetes	f:Flavobacteriaceae(0.1100)	g:Chitinophaga(0.0400)	s:Desulfotomaculum_defluvii(0.0400)		0	0	0	0	0	0	0	0	0	0	0	3	0	0	0	0	0	0	0	0	0	0	0	0	0	0	0	0	0	0	0	0	0	0	0	0	0	0	0	0	0	0	0
1914	MH816653	p:Proteobacteria	f:Moraxellaceae(1.0000)	g:Acinetobacter(1.0000)	s:Acinetobacter_apis(1.0000)		0	0	0	0	0	0	0	0	8	0	0	90	0	0	0	0	0	8	0	0	0	0	0	0	0	0	0	0	0	7	0	0	0	0	0	0	0	0	1	0	0	0	0
1915	MH816654	p:Firmicutes	f:Clostridiaceae(0.6900)	g:Lactonifactor(0.3800)	s:Lactonifactor_longoviformis(0.3800)		0	0	0	0	0	0	7	0	0	0	0	0	0	0	0	0	0	0	0	0	0	0	0	0	0	0	0	0	0	0	0	0	0	0	0	0	0	0	0	0	0	0	0
1921	MH816655	p:Proteobacteria	f:Acetobacteraceae(1.0000)	g:Acidiphilium(0.3200)	s:Rhodopila_globiformis(0.2900)		0	0	0	0	0	0	0	0	0	0	0	0	0	0	0	0	0	0	0	0	0	0	0	0	0	0	0	0	0	0	0	0	0	0	0	0	0	0	0	0	0	0	0
1922	MH816656	p:Proteobacteria	f:Aurantimonadaceae(0.4800)	g:Rhizobium(0.4700)	s:Martelella_mangrovi(0.3600)		0	0	0	0	0	0	0	0	0	0	0	0	0	0	0	0	44	0	0	0	0	0	0	0	0	0	0	0	0	0	0	0	0	0	0	0	0	0	0	0	0	0	0
1926	MH816657	p:Proteobacteria	f:Beijerinckiaceae(0.9900)	g:Beijerinckia(0.9000)	s:Beijerinckia_mobilis(0.7500)		0	0	0	0	0	0	0	0	0	0	0	0	0	0	0	0	0	0	0	0	0	0	0	0	0	0	0	0	0	0	0	0	0	0	0	0	0	0	0	0	0	0	0
1927	MH816658	p:Verrucomicrobia	f:Verrucomicrobiaceae(0.3500)	g:Prosthecobacter(0.3200)	s:Prosthecobacter_algae(0.2900)		0	0	0	0	0	0	0	0	0	0	0	0	0	0	0	0	0	0	0	0	2	0	0	0	0	0	0	0	0	0	0	0	0	0	0	0	0	0	0	0	0	0	0
1930	MH816659	p:Proteobacteria	f:Campylobacteraceae(0.2800)	g:Campylobacter(0.2100)	s:Campylobacter_sputorum_subsp._bubulus(0.1200)		0	0	0	0	0	0	0	0	0	0	0	0	0	0	0	0	0	0	0	0	0	0	0	0	0	0	0	0	0	0	0	0	0	0	0	0	0	0	0	0	0	0	2
1931	MH816660	p:Firmicutes	f:Bacillaceae(1.0000)	g:Bacillus(1.0000)	s:Bacillus_kokeshiiformis(0.8900)		0	0	0	0	0	0	0	0	0	2	0	0	0	0	0	0	0	0	0	0	0	0	0	0	0	0	0	0	0	0	0	0	0	0	0	0	0	0	0	0	0	0	0
1938	MH816661	p:Bacteroidetes	f:Flavobacteriaceae(1.0000)	g:Flavobacterium(1.0000)	s:Flavobacterium_ummariense(0.5400)		0	0	0	0	0	0	1	0	0	0	0	0	7	0	0	0	0	3	0	0	0	0	0	0	0	0	0	0	0	0	0	0	0	0	0	0	0	0	0	0	0	0	0
1941	MH816662	p:Firmicutes	f:Bacillaceae(0.7500)	g:Lysinibacillus(0.6800)	s:Lysinibacillus_fusiformis(0.6800)		1	0	0	0	0	0	2	0	0	0	0	0	0	0	0	0	0	0	0	0	0	0	0	0	4	0	0	0	0	0	0	0	0	0	0	0	0	0	0	0	0	0	0
1944	MH816663	p:Bacteroidetes	f:Cryomorphaceae(1.0000)	g:Fluviicola(0.9900)	s:Fluviicola_hefeinensis(0.9900)		0	0	0	0	0	0	0	0	0	0	0	0	0	0	0	0	0	0	0	0	0	0	0	0	0	0	0	0	0	1	0	0	0	0	0	0	0	0	1	0	0	0	0
1945	MH816664	p:Actinobacteria	f:Nocardiaceae(0.9900)	g:Gordonia(0.9900)	s:Gordonia_araii(0.8500)		0	0	0	0	0	0	0	0	0	2	0	0	0	0	0	0	0	0	0	5	2	4	2	0	6	0	0	0	0	0	0	0	0	0	0	0	0	0	0	0	0	0	0
1952	MH816665	p:Proteobacteria	f:Desulfuromonadaceae(0.2700)	g:Desulfuromonas(0.2200)	s:Spirochaeta_africana(0.1200)		0	0	0	0	0	0	0	0	0	0	0	0	0	0	0	0	0	0	0	0	0	0	0	0	0	0	0	0	0	2	0	0	0	0	0	0	0	0	0	0	0	0	0
1953	MH816666	p:Firmicutes	f:Peptococcaceae(0.2800)	g:Desulfotomaculum(0.2700)	s:Ammoniphilus_oxalivorans(0.0900)		0	0	0	0	0	0	0	0	0	0	0	0	0	0	0	0	0	0	0	0	0	0	0	0	0	0	0	0	0	3	0	0	0	0	0	0	0	0	0	0	0	0	0
1955	MH816667	p:Firmicutes	f:Veillonellaceae(1.0000)	g:Megamonas(1.0000)	s:Megamonas_hypermegale(1.0000)		0	0	0	0	0	0	0	0	0	0	0	0	0	0	0	0	0	0	0	0	0	0	0	0	0	0	0	0	0	3	0	0	0	0	0	0	0	0	0	0	0	0	0
1956	MH816668	p:Firmicutes	f:Bacillaceae(0.0800)	g:Bacillus(0.0600)	s:Geovibrio_ferrireducens(0.0500)		0	0	0	0	0	0	0	0	0	0	0	0	0	0	0	0	0	0	0	0	0	0	0	0	0	0	0	0	0	2	0	0	0	0	0	0	0	0	0	0	0	0	0
1957	MH816669	p:Proteobacteria	f:Alcaligenaceae(0.1500)	g:Mycoplasma(0.1500)	s:Alcaligenes_faecalis_subsp._faecalis(0.1100)		0	0	0	0	0	0	0	0	0	0	0	0	0	0	0	0	0	0	0	0	0	0	0	0	0	0	0	0	0	2	0	0	0	0	0	0	0	0	0	0	0	0	0
1958	MH816670	p:Bacteroidetes	f:Chitinophagaceae(1.0000)	g:Heliimonas(0.4800)	s:Heliimonas_saccharivorans(0.4800)		0	6	14	0	0	0	0	0	0	0	0	0	0	0	0	0	0	0	0	0	0	0	0	0	0	0	0	0	0	0	0	0	0	0	0	0	0	0	0	0	0	0	0
1959	MH816671	p:Bacteroidetes	f:Flavobacteriaceae(1.0000)	g:Flavobacterium(1.0000)	s:Flavobacterium_fluvii(0.7700)		0	1	0	0	0	0	0	0	0	0	0	0	0	0	0	0	19	1	0	0	0	0	0	0	0	0	0	0	0	0	0	0	0	0	0	0	0	0	0	0	0	0	0
1960	MH816672	p:Proteobacteria	f:Pseudomonadaceae(1.0000)	g:Pseudomonas(0.8900)	s:Pseudomonas_argentinensis(0.7900)		0	0	0	0	0	0	0	0	0	1	0	0	0	0	0	0	6	0	0	0	0	0	0	0	0	0	0	0	0	0	0	0	0	0	0	0	0	0	0	0	0	0	0
1961	MH816673	p:Proteobacteria	f:Comamonadaceae(0.5700)	g:Acidovorax(0.5400)	s:Acidovorax_avenae(0.4400)		0	0	0	0	0	6	0	0	0	0	0	0	0	0	0	0	0	0	0	0	0	0	0	0	0	0	0	0	0	0	0	0	1	0	0	0	0	0	0	0	0	0	0
1963	MH816674	p:Firmicutes	f:Enterococcaceae(0.9600)	g:Enterococcus(0.9600)	s:Enterococcus_canintestini(0.4000)		0	0	0	0	1	0	5	0	0	0	0	1	0	1	0	0	0	0	0	0	0	0	0	0	0	0	0	0	0	0	0	0	0	0	0	0	0	0	0	0	0	0	0
1967	MH816675	p:Firmicutes	f:Clostridiaceae(0.1800)	g:Acetoanaerobium(0.1000)	s:Acetoanaerobium_noterae(0.1000)		0	0	0	0	0	0	0	0	0	0	0	0	0	0	0	0	0	2	0	0	0	0	0	0	0	0	0	0	0	0	0	0	0	0	0	0	0	0	0	0	0	0	0
1970	MH816676	p:Proteobacteria	f:Ectothiorhodospiraceae(0.5000)	g:Arhodomonas(0.3700)	s:Arhodomonas_recens(0.3100)		0	0	0	0	0	0	0	0	0	0	0	0	0	0	0	0	0	2	0	0	0	0	0	0	0	0	0	0	0	0	0	0	0	0	0	0	0	0	0	0	0	0	0
1971	MH816677	p:Actinobacteria	f:Microbacteriaceae(0.9800)	g:Agrococcus(0.3900)	s:Agrococcus_terreus(0.2500)		0	0	0	0	0	0	0	0	0	0	0	0	0	0	0	0	5	0	0	0	0	0	0	0	0	0	0	0	0	0	0	0	0	0	0	0	0	0	0	0	0	0	0
1975	MH816678	p:Proteobacteria	f:Rhodanobacteraceae(1.0000)	g:Dyella(1.0000)	s:Dyella_thiooxydans(0.9900)		0	0	1	0	1	0	1	0	0	0	0	0	0	0	0	0	0	0	0	0	1	0	0	0	0	0	0	0	0	0	0	0	0	0	0	0	0	0	0	0	0	0	0
1977	MH816679	p:Actinobacteria	f:Nocardiaceae(0.9500)	g:Gordonia(0.9500)	s:Gordonia_araii(0.5200)		0	0	0	0	0	0	0	0	0	0	0	0	0	0	0	0	0	0	0	4	4	1	3	1	8	0	0	0	0	0	0	0	0	0	0	0	0	0	0	0	0	0	0
1979	MH816680	p:Firmicutes	f:Carnobacteriaceae(0.9700)	g:Granulicatella(0.9700)	s:Granulicatella_elegans(0.9300)		0	0	0	0	0	0	3	0	0	0	0	0	0	0	0	65	0	8	0	1	0	0	0	0	0	0	0	0	0	0	0	0	0	0	0	0	0	0	1	0	0	0	0
1980	MH816681	p:Actinobacteria	f:Microbacteriaceae(1.0000)	g:Frigoribacterium(0.7900)	s:Frigoribacterium_faeni(0.6300)		0	0	0	0	0	0	2	0	0	1	0	0	0	0	0	0	0	0	0	0	0	0	0	0	0	0	0	0	0	0	0	0	0	0	0	0	0	0	0	0	0	0	0
1982	MH816682	p:Actinobacteria	f:Dermabacteraceae(1.0000)	g:Brachybacterium(1.0000)	s:Brachybacterium_ginsengisoli(0.7100)		0	0	0	0	0	0	3	0	0	0	0	0	0	0	0	0	0	0	0	0	0	0	0	0	0	0	0	0	0	0	0	0	0	0	0	0	0	0	0	0	0	0	0
1992	MH816683	p:Proteobacteria	f:Caulobacteraceae(1.0000)	g:Brevundimonas(1.0000)	s:Brevundimonas_terrae(0.6800)		0	0	0	0	0	0	0	0	0	0	0	56	0	0	0	0	0	0	0	0	0	0	0	0	0	0	0	0	0	0	0	0	0	0	0	0	0	0	0	0	0	0	0
1993	MH816684	p:Proteobacteria	f:Micropepsaceae	g:Rhizomicrobium(0.4800)	s:Rhizomicrobium_electricum(0.4800)		0	0	0	0	0	0	3	0	0	0	0	0	0	0	0	0	0	0	0	0	0	0	0	0	0	0	0	0	0	0	0	0	0	0	0	0	0	0	0	0	0	0	0
1996	MH816685	p:Bacteroidetes	f:Porphyromonadaceae(0.9000)	g:Parabacteroides(0.7800)	s:Parabacteroides_chinchillae(0.3800)		0	0	0	0	0	0	2	0	0	0	0	0	0	0	0	0	0	0	0	0	0	0	0	0	0	0	0	0	0	0	0	0	0	0	0	0	0	0	0	0	0	0	0
1998	MH816686	p:Bacteroidetes	f:Rikenellaceae(0.8300)	g:Alistipes(0.8000)	s:Alistipes_finegoldii(0.5900)		0	0	0	0	0	0	2	0	0	0	0	0	0	0	0	0	0	0	0	0	0	0	0	0	0	0	0	0	0	0	0	0	0	0	0	0	0	0	0	0	0	0	0
2003	MH816687	p:Firmicutes	f:Unclassified_Clostridiales(0.2900)	g:Helcococcus(0.1300)	s:Helcococcus_ovis(0.1000)		0	0	2	0	0	0	0	0	0	0	0	0	0	0	0	0	0	0	0	0	0	0	0	0	0	0	0	0	0	0	0	0	0	0	0	0	0	0	0	0	0	0	0
2004	MH816688	p:Proteobacteria	f:Legionellaceae(0.7800)	g:Legionella(0.7800)	s:Legionella_brunensis(0.3800)		0	0	3	0	0	0	0	0	0	0	0	0	0	0	0	0	0	0	0	0	0	0	0	0	0	0	0	0	0	0	0	0	0	0	0	0	0	0	0	0	0	0	0
2005	MH816689	p:Bacteroidetes	f:Flavobacteriaceae(1.0000)	g:Soonwooa(1.0000)	s:Soonwooa_buanensis(1.0000)		0	0	0	0	0	0	3	0	0	0	0	0	0	0	0	0	0	0	0	0	0	0	0	0	0	0	0	0	0	0	0	0	0	0	0	0	0	0	0	0	0	0	0
2006	MH816690	p:Bacteroidetes	f:Chitinophagaceae(1.0000)	g:Flavitalea(0.9900)	s:Flavitalea_gansuensis(0.9900)		0	0	9	0	0	0	0	0	0	0	0	0	0	0	0	0	0	0	0	0	0	0	0	0	0	0	0	0	0	0	0	0	0	0	0	0	0	0	0	0	0	0	0
2007	MH816691	p:Bacteroidetes	f:Porphyromonadaceae(0.9700)	g:Parabacteroides(0.9100)	s:Parabacteroides_chinchillae(0.4600)		0	0	0	0	0	0	2	0	0	0	0	0	0	0	0	0	0	0	0	0	0	0	0	0	0	0	0	0	0	0	0	0	0	0	0	0	0	0	0	0	0	0	0
2009	MH816692	p:Verrucomicrobia	f:Verrucomicrobiaceae(1.0000)	g:Luteolibacter(0.6300)	s:Luteolibacter_cuticulihirudinis(0.3900)		0	0	0	0	0	0	0	1	0	0	0	0	0	0	0	0	0	0	0	0	0	0	0	0	0	0	0	0	0	2	0	0	0	0	0	0	0	0	0	0	0	0	0
2010	MH816693	p:Proteobacteria	f:Lysobacteraceae(1.0000)	g:Pseudoxanthomonas(1.0000)	s:Pseudoxanthomonas_gei(0.9500)		0	0	0	0	0	0	0	0	0	0	13	35	0	0	0	0	0	0	0	0	0	0	0	0	0	0	0	0	0	0	0	0	0	0	0	0	0	0	0	0	0	0	0
2011	MH816694	p:Proteobacteria	f:Burkholderiaceae(0.9900)	g:Burkholderia(0.9900)	s:Burkholderia_diazotrophica(0.8500)		0	0	0	0	0	0	14	0	0	0	0	0	0	0	0	0	0	0	0	0	0	0	0	0	0	0	0	0	0	0	0	0	0	0	0	0	0	0	0	0	0	0	0
2013	MH816695	p:Proteobacteria	f:Unclassified_Burkholderiales(0.6800)	g:Aquabacterium(0.4300)	s:Aquabacterium_limnoticum(0.3900)		0	0	0	0	14	0	0	0	0	0	0	0	0	0	0	0	0	0	0	0	0	0	0	0	0	0	0	0	0	0	0	0	0	0	0	0	0	0	0	0	0	0	0
2016	MH816696	p:Bacteroidetes	f:Porphyromonadaceae(0.9800)	g:Parabacteroides(0.9300)	s:Parabacteroides_chinchillae(0.6300)		0	0	0	0	0	0	6	0	0	0	0	0	0	0	0	0	0	0	0	0	0	0	0	0	0	0	0	0	0	0	0	0	0	0	0	0	0	0	0	0	0	0	0
2017	MH816697	p:Firmicutes	f:Ruminococcaceae(1.0000)	g:Faecalibacterium(1.0000)	s:Faecalibacterium_prausnitzii(1.0000)		0	0	0	0	16	0	1	0	0	0	0	0	0	0	0	0	0	0	0	0	0	0	0	0	0	0	0	0	0	0	0	0	0	0	0	0	0	0	0	0	0	0	0
2018	MH816698	p:Firmicutes	f:Veillonellaceae(1.0000)	g:Selenomonas(0.9900)	s:Selenomonas_artemidis(0.9600)		0	0	0	0	0	0	0	0	9	0	0	0	0	0	0	0	0	0	0	0	0	0	0	0	0	0	0	0	0	0	0	0	0	0	0	0	0	0	0	0	0	0	0
2019	MH816699	p:Bacteroidetes	f:Bacteroidaceae(1.0000)	g:Bacteroides(1.0000)	s:Bacteroides_eggerthii(0.9800)		0	0	0	0	0	0	2	0	0	0	0	0	0	0	0	0	0	0	0	0	0	0	0	0	0	0	0	0	0	0	0	0	0	0	0	0	0	0	0	0	0	0	0
2021	MH816700	p:Proteobacteria	f:Burkholderiaceae(1.0000)	g:Polynucleobacter(1.0000)	s:Polynucleobacter_difficilis(0.9900)		0	0	0	0	9	0	0	0	1	0	0	0	0	0	0	0	0	0	0	0	0	0	0	0	0	0	0	0	0	0	0	0	0	0	0	0	0	0	0	0	0	0	0
2023	MH816701	p:Proteobacteria	f:Halomonadaceae(0.1300)	g:Halomonas(0.1200)	s:Halomonas_andesensis(0.0500)		0	0	0	0	1	0	0	0	0	0	0	0	0	0	0	0	0	0	0	0	0	0	0	0	0	0	0	0	0	0	0	0	0	0	0	0	11	0	0	0	0	0	0
2028	MH816702	p:Firmicutes	f:Ruminococcaceae(0.6300)	g:Anaerotruncus(0.4000)	s:Anaerotruncus_colihominis(0.4000)		0	0	0	0	0	0	2	0	0	0	0	0	0	0	0	0	0	0	0	0	0	0	0	0	0	0	0	0	0	0	0	0	0	0	0	0	0	0	0	0	0	0	0
2029	MH816703	p:Firmicutes	f:Lactobacillaceae(1.0000)	g:Pediococcus(0.8200)	s:Pediococcus_damnosus(0.7200)		0	0	0	0	1	0	1	0	0	0	0	0	0	0	0	0	0	0	0	0	0	0	0	0	0	0	0	0	0	0	0	0	0	0	0	0	0	0	0	0	0	0	0
2034	MH816704	p:Proteobacteria	f:Methylophilaceae(0.9700)	g:Methylophilus(0.9600)	s:Methylophilus_methylotrophus(0.8700)		0	0	1	0	0	0	1	0	0	0	0	0	0	0	0	0	0	0	0	0	0	0	0	0	0	0	0	0	0	0	0	0	0	0	0	0	0	0	0	0	0	0	0
a Taxonomic assignment scores for family, genus and species are provided between brackets. In general, taxonomic assignments are considered reliable when bootstrap confidence values exceed 0.80.
b GenBank Accession N° for representative sequence (selected by UPARSE).
c Taxonomic assignment at phylum level was performed manually based on assigned family.
[truncated: 5 more columns]
